# Supplementary material for: A new computational approach redefines the subtelomeric vir superfamily of Plasmodium vivax
Source: PubMed Central journal article supplement (PMC3566924; doi:10.1186/1471-2164-14-8), 2013-01-16

## Comparison with OrthoMCL5

**Description:** newly defined *vir* subfamilies, as well as the new *Pvpir* families were compared with OrthoMCL5 groups. Venn diagrams show the number of genes in common, and those specific for each (sub)family and OrthoMCL5 groups. OrthoMCL5 groups are indicated with their OrthomCL5 id.

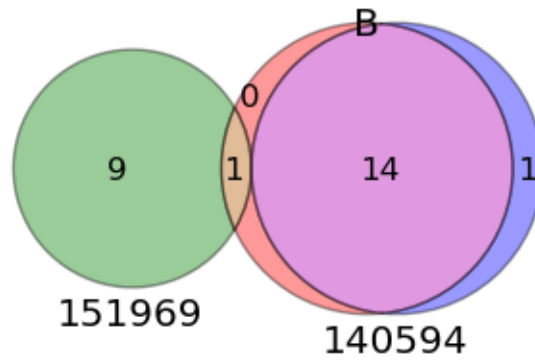

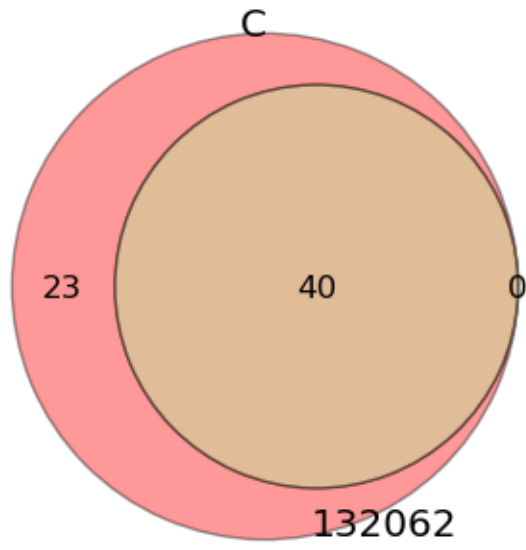

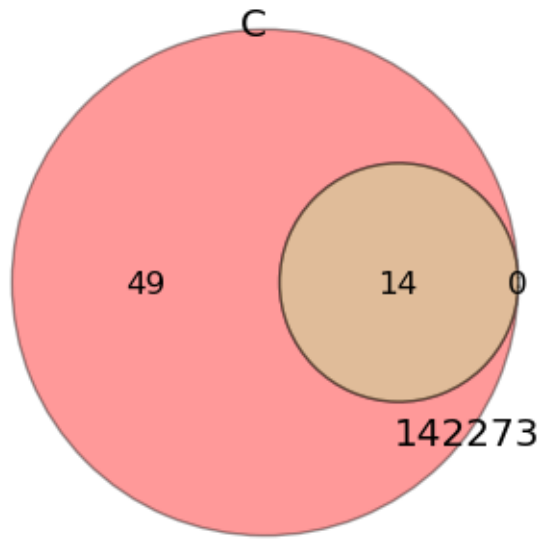

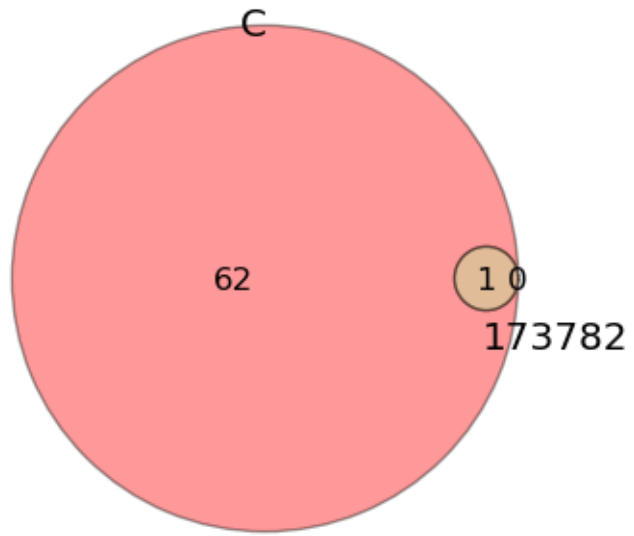

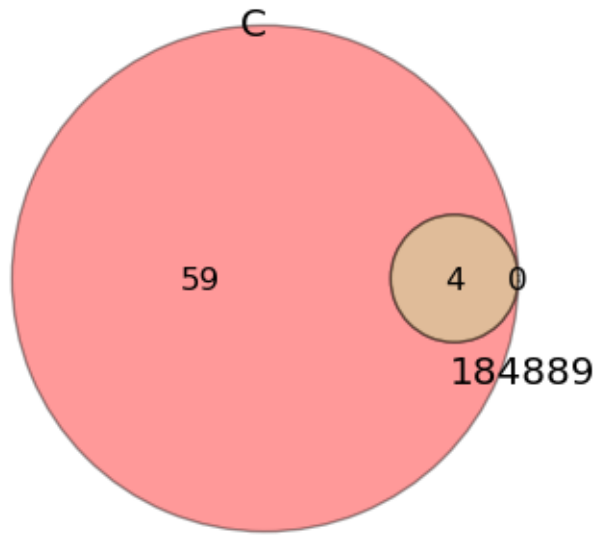

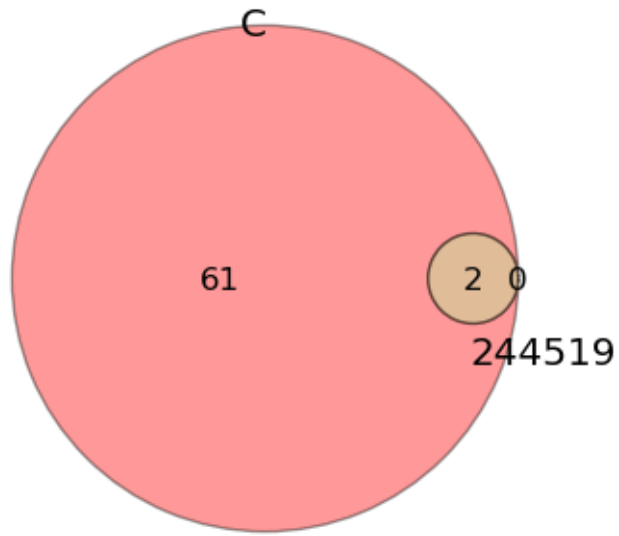

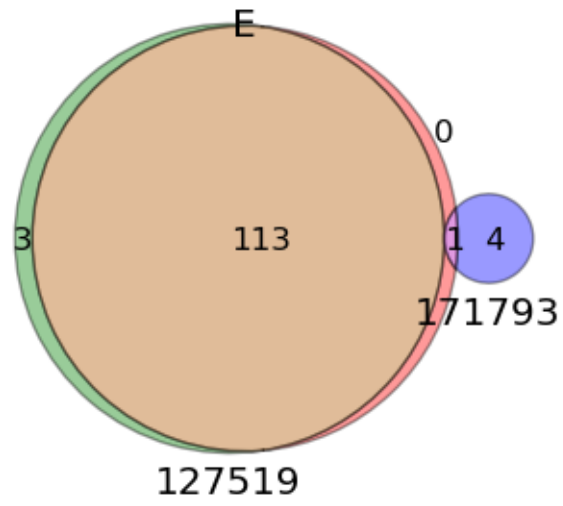

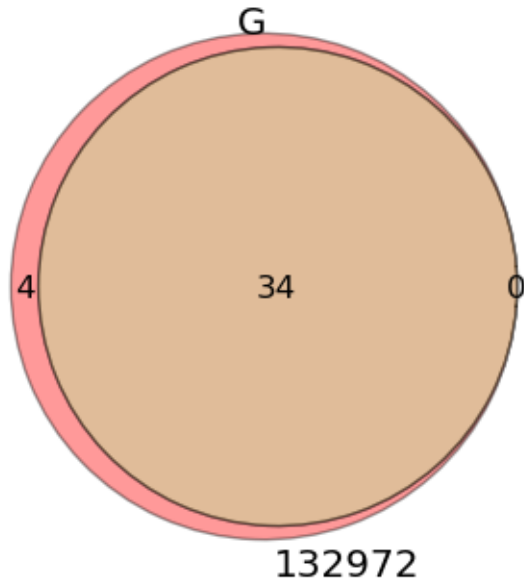



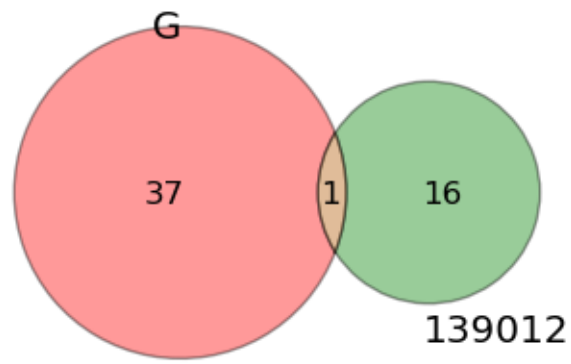

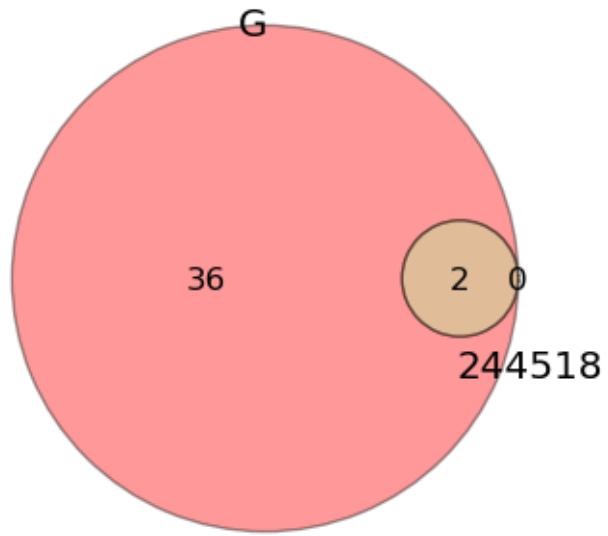

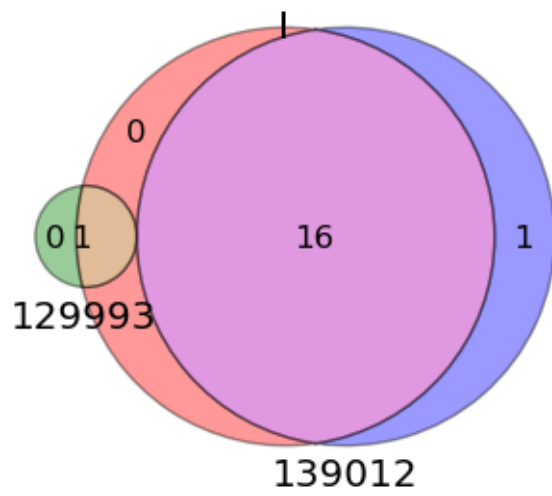

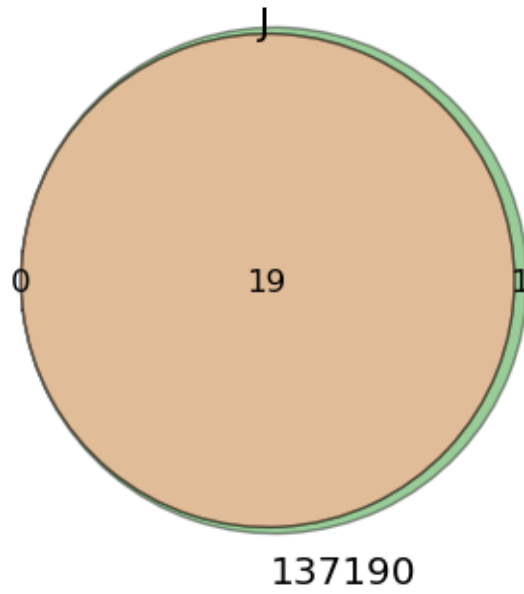

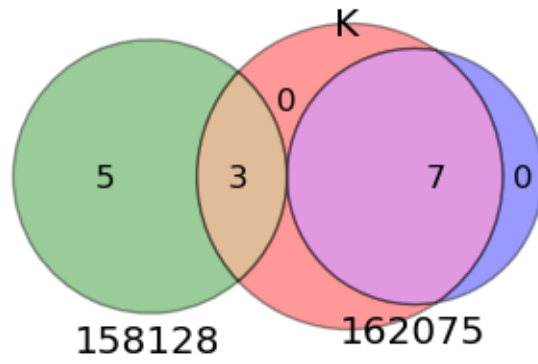

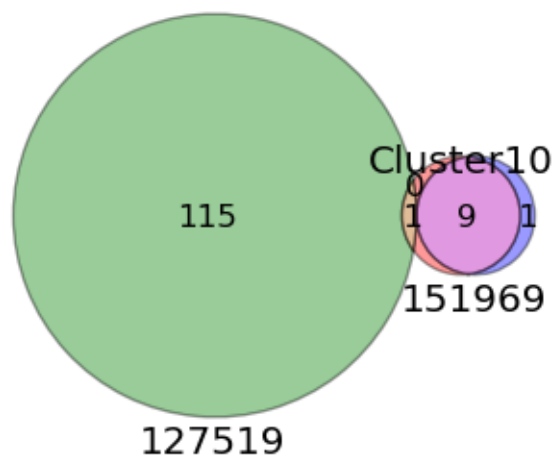

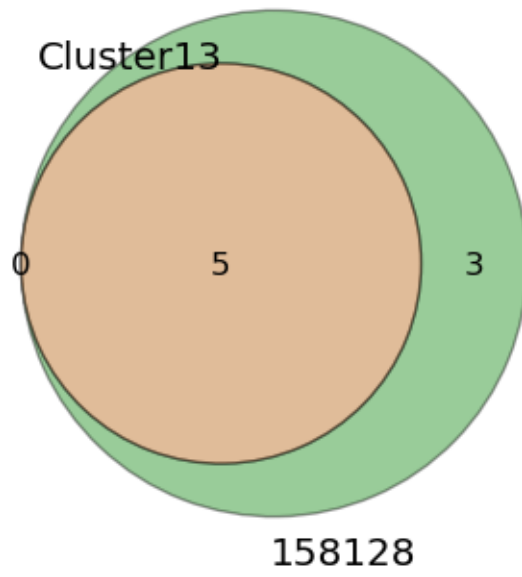

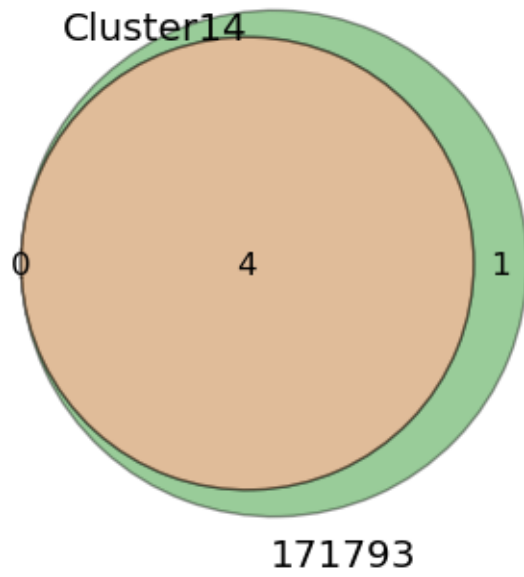



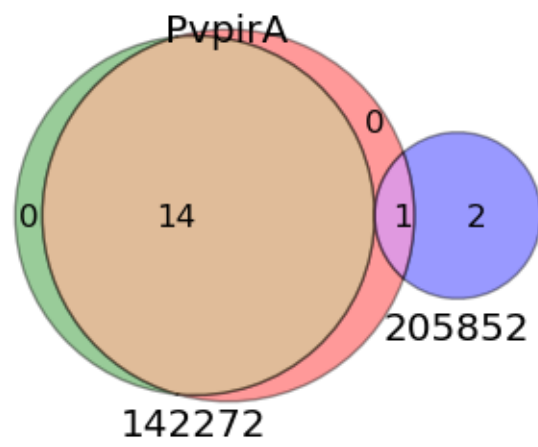

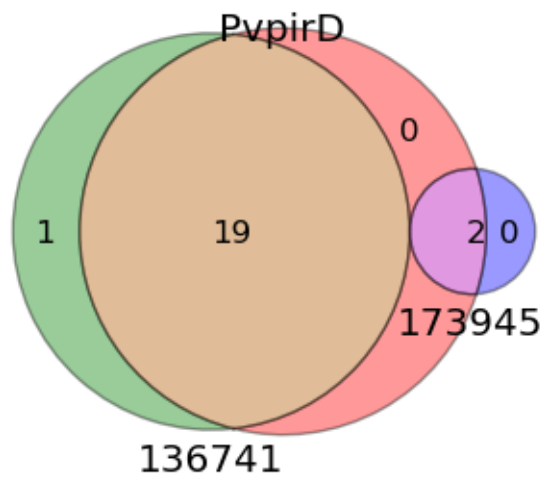

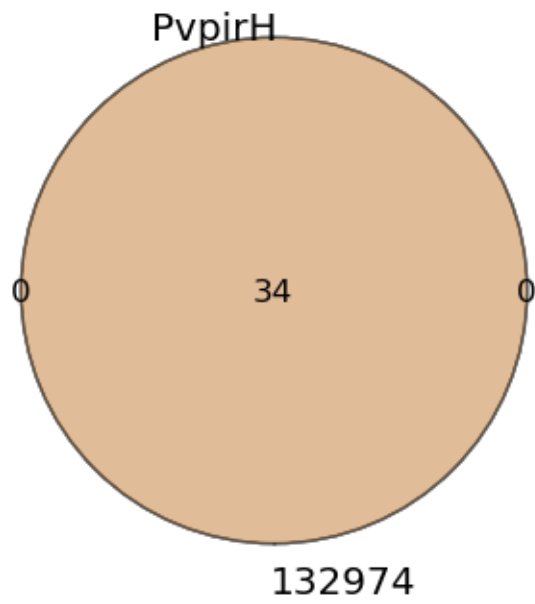

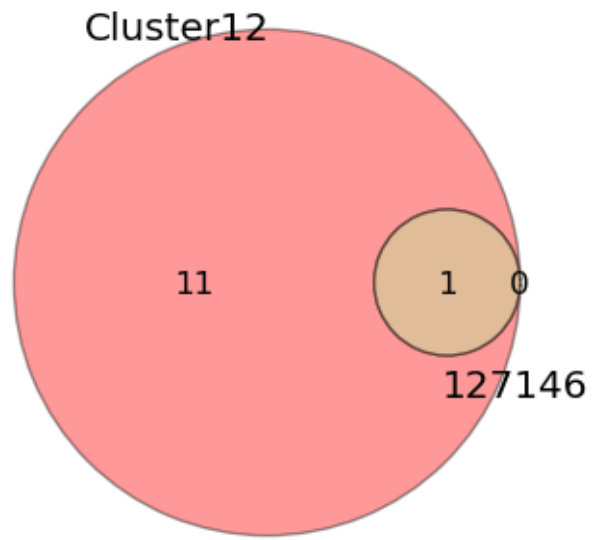

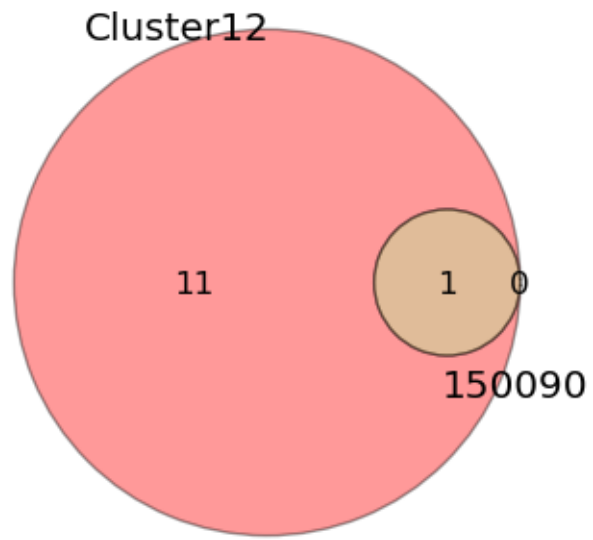

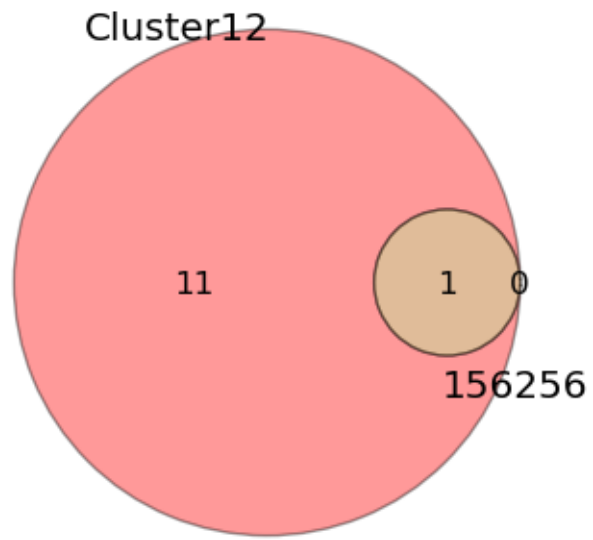

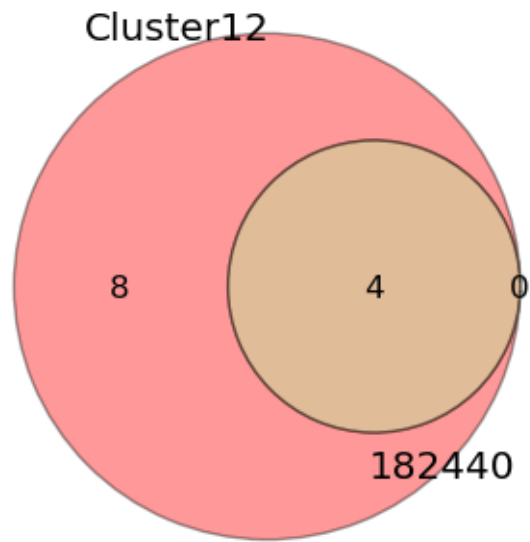

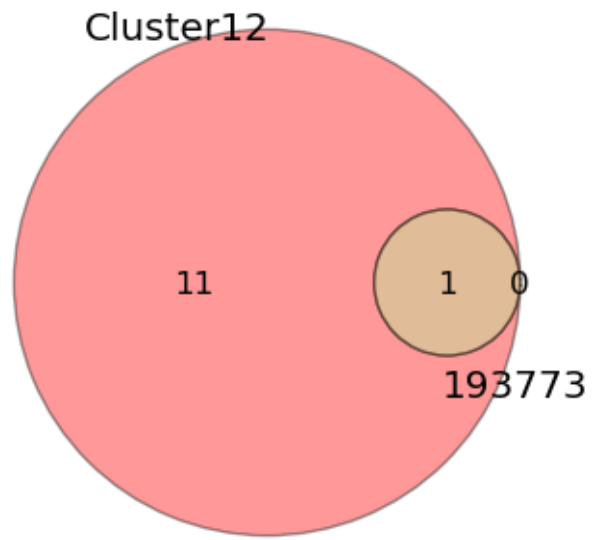



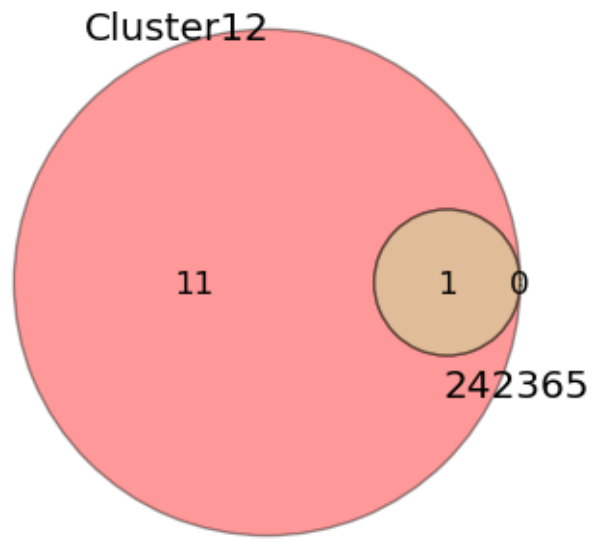

Supplement: 1471-2164-14-8-S7.pdf [file 1471-2164-14-8-S7.pdf]
