# Supplementary material for: A new computational approach redefines the subtelomeric vir superfamily of Plasmodium vivax
Source: PubMed Central journal article supplement (PMC3566924; doi:10.1186/1471-2164-14-8), 2013-01-16
Supplement: 1471-2164-14-8-S3.pdf [file 1471-2164-14-8-S3.pdf]

## vir chromosomal location

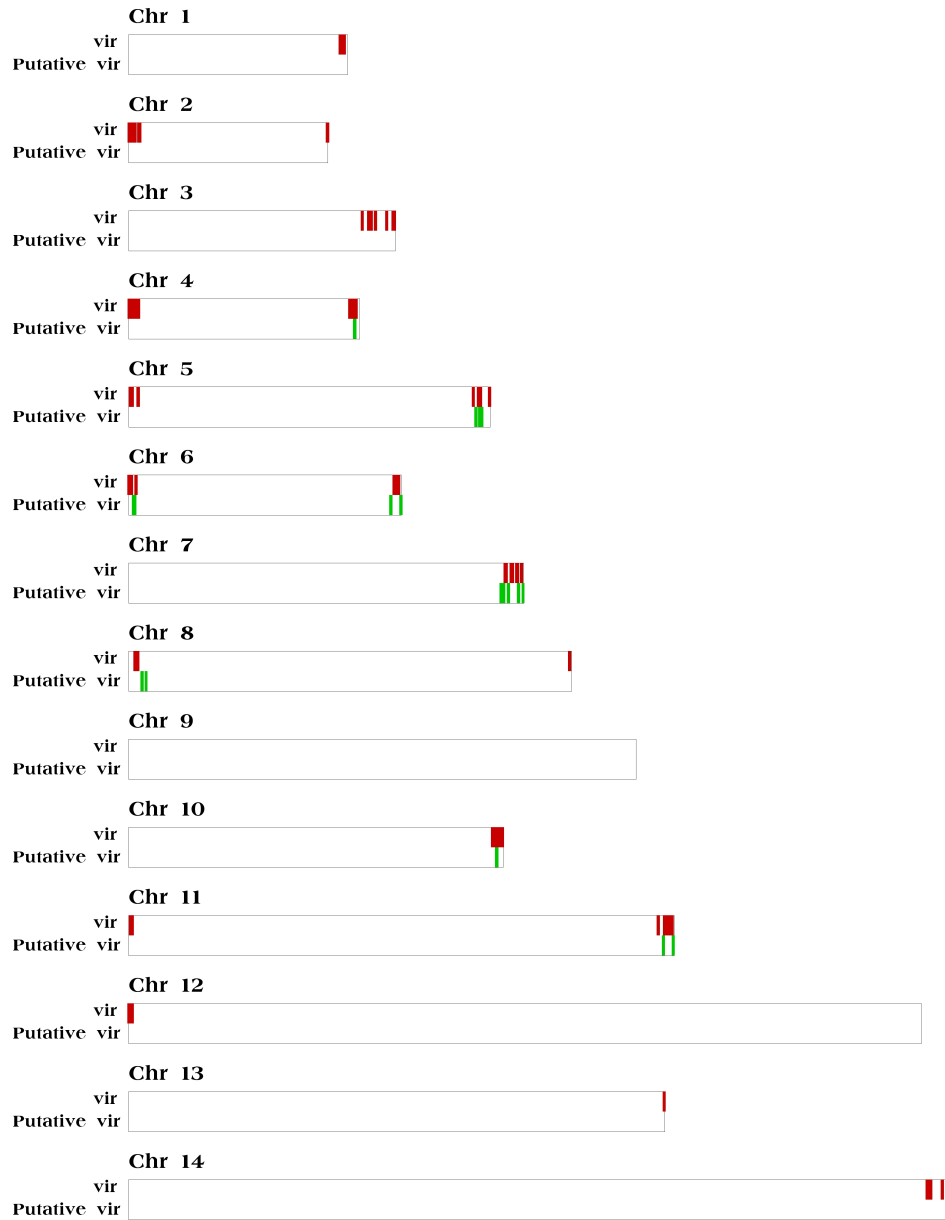

**Description:** For each chromosome, two rows of colored boxes are shown: one row illustrates the genomic location of the *vir* members (red) while the other illustrates the location of the putative *vir* (green) in that chromosome. Only genes annotated at specific chromosomes are shown.
