# Supplementary material for: A new computational approach redefines the subtelomeric vir superfamily of Plasmodium vivax
Source: PubMed Central journal article supplement (PMC3566924; doi:10.1186/1471-2164-14-8), 2013-01-16
Supplement: 1471-2164-14-8-S6.pdf [file 1471-2164-14-8-S6.pdf]

# Conserved motifs composition

## 1 InterProScan predictions

**Description:** tables below provide InterProScan predictions for each of the different (sub)families.

### 1.1 B

| #  | Gene ID    | Length | Match ID | Match Name     | DB Name | Start | End | Score   |
|----|------------|--------|----------|----------------|---------|-------|-----|---------|
| 1  | PVX_033190 | 357    | PF05795  | Plasmodium_Vir | PFAM    | 23    | 353 | 9.4E-25 |
| 2  | PVX_115480 | 276    | PF05795  | Plasmodium_Vir | PFAM    | 24    | 237 | 6.6e-23 |
|    |            |        | coil     | coiled-coil    | COIL    | 53    | 74  | NA      |
| 3  | PVX_025690 | 351    | PF05795  | Plasmodium_Vir | PFAM    | 24    | 348 | 2.8E-24 |
| 4  | PVX_058690 | 299    | PF05795  | Plasmodium_Vir | PFAM    | 27    | 295 | 2.1E-22 |
| 5  | PVX_062190 | 326    | PF05795  | Plasmodium_Vir | PFAM    | 1     | 322 | 8.6-17  |
| 6  | PVX_164265 | 362    | PF05795  | Plasmodium_Vir | PFAM    | 23    | 358 | 1.6E-21 |
| 7  | PVX_180275 | 236    | PF05795  | Plasmodium_Vir | PFAM    | 35    | 231 | 4.1E-17 |
| 8  | PVX_103680 | 361    | PF05795  | Plasmodium_Vir | PFAM    | 24    | 357 | 8.2-27  |
| 9  | PVX_108775 | 62     | PF05795  | Plasmodium_Vir | PFAM    | 1     | 57  | 9.5E-7  |
| 10 | PVX_110305 | 267    | PF05795  | Plasmodium_Vir | PFAM    | 24    | 239 | 1.0E-24 |
| 11 | PVX_088790 | 467    | PF05795  | Plasmodium_Vir | PFAM    | 28    | 206 | 9.6E-18 |
|    |            |        | PF05795  | Plasmodium_Vir | PFAM    | 236   | 452 | 1.3E-23 |
| 12 | PVX_096915 | 295    | PF05795  | Plasmodium_Vir | PFAM    | 62    | 268 | 5.5E-22 |
| 13 | PVX_075195 | 302    | PF05795  | Plasmodium_Vir | PFAM    | 24    | 242 | 5.1E-16 |
| 14 | PVX_086350 | 397    | PF05795  | Plasmodium_Vir | PFAM    | 25    | 396 | 3.7E-42 |
| 15 | PVX_059690 |        |          |                |         |       |     |         |

### 1.2 C

| #  | Gene ID    | Length | Match ID        | Match Name            | DB Name | Start | End | Score   |
|----|------------|--------|-----------------|-----------------------|---------|-------|-----|---------|
| 1  | PVX_004520 | 363    | PF05795         | Plasmodium_Vir        | PFAM    | 21    | 362 | 1.3E-65 |
| 2  | PVX_043690 | 85     | PF05795         | Plasmodium_Vir        | PFAM    | 6     | 85  | 1.2E-10 |
| 3  | PVX_088800 | 358    | PF05795         | Plasmodium_Vir        | PFAM    | 11    | 355 | 3.2E-67 |
| 4  | PVX_169270 | 346    | PF05795         | Plasmodium_Vir        | PFAM    | 21    | 346 | 2.2E-58 |
| 5  | PVX_003485 | 329    | PF05795         | Plasmodium_Vir        | PFAM    | 37    | 317 | 6.7E-54 |
| 6  | PVX_004510 | 353    | PF05795         | Plasmodium_Vir        | PFAM    | 9     | 326 | 2.7E-57 |
| 7  | PVX_044190 | 61     | PF05795         | Plasmodium_Vir        | PFAM    | 1     | 61  | 7.8E-8  |
| 8  | PVX_045690 | 140    | PF05795         | Plasmodium_Vir        | PFAM    | 21    | 137 | 9.1E-17 |
| 9  | PVX_175270 | 332    | PF05795         | Plasmodium_Vir        | PFAM    | 6     | 332 | 1.1E-60 |
| 10 | PVX_179275 | 238    | PF05795         | Plasmodium_Vir        | PFAM    | 15    | 215 | 4.6e-39 |
|    |            |        | seg             | seg                   | SEG     | 1     | 12  | NA      |
| 11 | PVX_184285 | 348    | SignalP-NN(euk) | signal-peptide        | SIGNALP | 22    | 348 | 7.2E-71 |
| 12 | PVX_105700 | 340    | PF05795         | Plasmodium_Vir        | PFAM    | 21    | 340 | 2.5E-63 |
| 13 | PVX_108770 | 409    | PF05795         | Plasmodium_Vir        | PFAM    | 33    | 405 | 4.9E-48 |
| 14 | PVX_113230 | 440    | PF05795         | Plasmodium_Vir        | PFAM    | 10    | 375 | 3E-49   |
| 15 | PVX_061190 | 342    | PF05795         | Plasmodium_Vir        | PFAM    | 21    | 342 | 1.6E-60 |
| 16 | PVX_066690 | 352    | PF05795         | Plasmodium_Vir        | PFAM    | 121   | 351 | 1.6e-20 |
|    |            |        | seg             | seg                   | SEG     | 286   | 300 | NA      |
| 17 | PVX_072690 | 324    | PF05795         | Plasmodium_Vir        | PFAM    | 3     | 324 | 8.9E-48 |
| 18 | PVX_029190 | 335    | PF05795         | Plasmodium_Vir        | PFAM    | 21    | 335 | 7.9E-61 |
| 19 | PVX_030190 | 325    | PF05795         | Plasmodium_Vir        | PFAM    | 2     | 325 | 2E-58   |
| 20 | PVX_034190 | 403    | PF05795         | Plasmodium_Vir        | PFAM    | 34    | 400 | 1.8E-58 |
| 21 | PVX_037190 | 404    | PF05795         | Plasmodium_Vir        | PFAM    | 34    | 400 | 6.2E-55 |
| 22 | PVX_021680 | 355    | PF05795         | Plasmodium_Vir        | PFAM    | 23    | 355 | 7.3E-71 |
| 23 | PVX_024690 | 343    | PF05795         | Plasmodium_Vir        | PFAM    | 21    | 340 | 5.6E-43 |
| 24 | PVX_026190 | 353    | PF05795         | Plasmodium_Vir        | PFAM    | 20    | 353 | 2.8E-55 |
| 25 | PVX_010610 | 315    | PF05795         | Plasmodium_Vir        | PFAM    | 24    | 315 | 5.3E-50 |
| 26 | PVX_016140 | 324    | PF05795         | Plasmodium_Vir        | PFAM    | 24    | 324 | 1.2E-53 |
| 27 | PVX_019670 | 172    | PF05795         | Plasmodium_Vir        | PFAM    | 34    | 172 | 3.4E-21 |
| 28 | PVX_127260 | 210    | PF05795         | Plasmodium_Vir        | PFAM    | 21    | 204 | 6.8E-35 |
| 29 | PVX_149260 | 270    | PF05795         | Plasmodium_Vir        | PFAM    | 2     | 269 | 2.4E-54 |
| 30 | PVX_159260 | 527    | PF05795         | Plasmodium_Vir        | PFAM    | 160   | 527 | 8.1e-56 |
|    |            |        | seg             | seg                   | SEG     | 69    | 81  | NA      |
|    |            |        | SignalP-NN(euk) | signal-peptide        | SIGNALP | 1     | 22  | NA      |
|    |            |        | tmhmm           | transmembrane_regions | TMHMM   | 24    | 44  | NA      |
|    |            |        | tmhmm           | transmembrane_regions | TMHMM   | 71    | 89  | NA      |
|    |            |        | tmhmm           | transmembrane_regions | TMHMM   | 116   | 136 | NA      |
| 31 | PVX_115475 | 229    | PF05795         | Plasmodium_Vir        | PFAM    | 14    | 212 | 2E-34   |
| 32 | PVX_120330 | 418    | PF05795         | Plasmodium_Vir        | PFAM    | 16    | 417 | 3.1E-56 |
| 33 | PVX_124700 | 255    | PF05795         | Plasmodium_Vir        | PFAM    | 24    | 219 | 3.2E-26 |
| 34 | PVX_124710 | 313    | PF05795         | Plasmodium_Vir        | PFAM    | 9     | 304 | 3.7E-51 |

|    |            |     |         |                       |       |     |     |         |
|----|------------|-----|---------|-----------------------|-------|-----|-----|---------|
| 35 | PVX_103665 | 290 | PF05795 | Plasmodium_Vir        | PFAM  | 8   | 289 | 9.5E-38 |
| 36 | PVX_104185 | 288 | PF05795 | Plasmodium_Vir        | PFAM  | 2   | 287 | 7.8E-24 |
| 37 | PVX_101615 | 361 | PF05795 | Plasmodium_Vir        | PFAM  | 9   | 319 | 1.7E-54 |
| 38 | PVX_102125 | 153 | PF05795 | Plasmodium_Vir        | PFAM  | 6   | 152 | 4.5E-16 |
| 39 | PVX_103660 | 360 | PF05795 | Plasmodium_Vir        | PFAM  | 34  | 348 | 3.4E-41 |
| 40 | PVX_096945 | 314 | PF05795 | Plasmodium_Vir        | PFAM  | 20  | 310 | 1.8E-31 |
| 41 | PVX_101560 | 302 | PF05795 | Plasmodium_Vir        | PFAM  | 6   | 201 | 3.5E-25 |
| 42 | PVX_101600 | 372 | PF05795 | Plasmodium_Vir        | PFAM  | 22  | 369 | 9.4E-48 |
| 43 | PVX_095995 | 315 | PF05795 | Plasmodium_Vir        | PFAM  | 18  | 310 | 2.7E-21 |
| 44 | PVX_096000 | 353 | PF05795 | Plasmodium_Vir        | PFAM  | 22  | 352 | 1.1E-58 |
| 45 | PVX_027690 | 315 | PF05795 | Plasmodium_Vir        | PFAM  | 15  | 315 | 2.3E-49 |
| 46 | PVX_028190 | 284 | PF05795 | Plasmodium_Vir        | PFAM  | 2   | 284 | 1.0E-48 |
| 47 | PVX_004525 | 353 | PF05795 | Plasmodium_Vir        | PFAM  | 20  | 352 | 1.4E-41 |
| 48 | PVX_045355 | 330 | PF05795 | Plasmodium_Vir        | PFAM  | 24  | 327 | 3.2E-31 |
| 49 | PVX_006580 | 351 | PF05795 | Plasmodium_Vir        | PFAM  | 23  | 351 | 1.0E-64 |
| 50 | PVX_008085 | 418 | PF05795 | Plasmodium_Vir        | PFAM  | 33  | 392 | 2.6E-54 |
| 51 | PVX_009090 | 337 | PF05795 | Plasmodium_Vir        | PFAM  | 10  | 337 | 8.4E-60 |
| 52 | PVX_051690 | 334 | PF05795 | Plasmodium_Vir        | PFAM  | 21  | 331 | 5.5E-60 |
| 53 | PVX_052190 | 360 | PF05795 | Plasmodium_Vir        | PFAM  | 146 | 288 | 3.5E-18 |
|    |            |     | seg     | seg                   | SEG   | 1   | 12  | NA      |
|    |            |     | tmhmm   | transmembrane_regions | TMHMM | 4   | 24  | NA      |
|    |            |     | tmhmm   | transmembrane_regions | TMHMM | 258 | 278 | NA      |
|    |            |     | tmhmm   | transmembrane_regions | TMHMM | 297 | 315 | NA      |
| 54 | PVX_052690 | 279 | PF05795 | Plasmodium_Vir        | PFAM  | 2   | 276 | 5.3E-39 |
| 55 | PVX_076895 | 325 | PF05795 | Plasmodium_Vir        | PFAM  | 11  | 325 | 4.7E-46 |
| 56 | PVX_086875 | 292 | PF05795 | Plasmodium_Vir        | PFAM  | 13  | 286 | 1.2E-29 |
| 57 | PVX_046190 | 320 | PF05795 | Plasmodium_Vir        | PFAM  | 118 | 237 | 1.8E-13 |
|    |            |     | seg     | seg                   | SEG   | 19  | 33  | NA      |
|    |            |     | seg     | seg                   | SEG   | 173 | 189 | NA      |
|    |            |     | seg     | seg                   | SEG   | 292 | 305 | NA      |
|    |            |     | tmhmm   | transmembrane_regions | TMHMM | 213 | 233 | NA      |
|    |            |     | tmhmm   | transmembrane_regions | TMHMM | 248 | 268 | NA      |
|    |            |     | tmhmm   | transmembrane_regions | TMHMM | 291 | 309 | NA      |
| 58 | PVX_050190 | 340 | PF05795 | Plasmodium_Vir        | PFAM  | 9   | 340 | 1.5E-71 |
| 59 | PVX_005065 | 198 | PF05795 | Plasmodium_Vir        | PFAM  | 18  | 175 | 2.2E-20 |
| 60 | PVX_005580 | 297 | PF05795 | Plasmodium_Vir        | PFAM  | 6   | 280 | 5.7E-53 |
| 61 | PVX_090320 | 212 | PF05795 | Plasmodium_Vir        | PFAM  | 21  | 210 | 3.1E-33 |
| 62 | PVX_094260 | 198 | PF05795 | Plasmodium_Vir        | PFAM  | 4   | 196 | 4.5E-20 |
| 63 | PVX_005575 |     |         |                       |       |     |     |         |

### 1.3 E

| #  | Gene ID    | Length | Match ID | Match Name     | DB Name | Start | End | Score    |
|----|------------|--------|----------|----------------|---------|-------|-----|----------|
| 1  | PVX_001615 | 366    | PF05795  | Plasmodium_Vir | PFAM    | 18    | 361 | 1.2E-61  |
| 2  | PVX_001645 | 529    | PF05795  | Plasmodium_Vir | PFAM    | 22    | 518 | 3.5E-46  |
| 3  | PVX_003510 | 453    | PF05795  | Plasmodium_Vir | PFAM    | 18    | 356 | 3.6E-52  |
| 4  | PVX_094240 | 443    | PF05795  | Plasmodium_Vir | PFAM    | 31    | 430 | 1.0E-75  |
| 5  | PVX_101620 | 594    | PF05795  | Plasmodium_Vir | PFAM    | 22    | 588 | 6.7E-64  |
| 6  | PVX_102640 | 441    | PF05795  | Plasmodium_Vir | PFAM    | 16    | 435 | 1.3E-95  |
| 7  | PVX_107235 | 582    | PF05795  | Plasmodium_Vir | PFAM    | 16    | 284 | 7.4E-71  |
| 8  | PVX_107735 | 362    | PF05795  | Plasmodium_Vir | PFAM    | 410   | 576 | 3.6E-28  |
| 9  | PVX_107740 | 304    | PF05795  | Plasmodium_Vir | PFAM    | 6     | 332 | 9.0E-49  |
| 10 | PVX_093710 | 488    | PF05795  | Plasmodium_Vir | PFAM    | 12    | 292 | 1.1E-48  |
| 11 | PVX_093720 | 496    | PF05795  | Plasmodium_Vir | PFAM    | 21    | 448 | 2.5E-62  |
| 12 | PVX_086860 | 447    | PF05795  | Plasmodium_Vir | PFAM    | 22    | 354 | 7.0E-61  |
| 13 | PVX_086865 | 576    | PF05795  | Plasmodium_Vir | PFAM    | 418   | 494 | 1.5E-8   |
| 14 | PVX_086895 | 553    | PF05795  | Plasmodium_Vir | PFAM    | 14    | 444 | 5.9E-64  |
| 15 | PVX_088780 | 446    | PF05795  | Plasmodium_Vir | PFAM    | 67    | 308 | 1.2E-19  |
| 16 | PVX_077695 | 545    | PF05795  | Plasmodium_Vir | PFAM    | 314   | 545 | 2.1E-49  |
| 17 | PVX_078195 | 569    | PF05795  | Plasmodium_Vir | PFAM    | 21    | 246 | 1.7E-10  |
| 18 | PVX_073690 | 433    | PF05795  | Plasmodium_Vir | PFAM    | 278   | 549 | 1.1E-46  |
| 19 | PVX_074190 | 323    | PF05795  | Plasmodium_Vir | PFAM    | 20    | 437 | 2.5E-49  |
| 20 | PVX_074690 | 427    | PF05795  | Plasmodium_Vir | PFAM    | 30    | 539 | 2.5E-87  |
| 21 | PVX_018660 | 493    | PF05795  | Plasmodium_Vir | PFAM    | 16    | 229 | 3.1E-58  |
| 22 | PVX_020170 | 333    | PF05795  | Plasmodium_Vir | PFAM    | 397   | 563 | 9.2E-27  |
| 23 | PVX_020680 | 581    | PF05795  | Plasmodium_Vir | PFAM    | 22    | 430 | 9.2E-80  |
| 24 | PVX_009595 | 392    | PF05795  | Plasmodium_Vir | PFAM    | 11    | 318 | 4.7E-53  |
| 25 | PVX_010105 | 421    | PF05795  | Plasmodium_Vir | PFAM    | 22    | 421 | 1.9E-77  |
| 26 | PVX_013620 | 537    | PF05795  | Plasmodium_Vir | PFAM    | 16    | 276 | 3.2E-64  |
| 27 | PVX_002480 | 616    | PF05795  | Plasmodium_Vir | PFAM    | 16    | 488 | 3.5E-60  |
| 28 | PVX_002485 | 276    | PF05795  | Plasmodium_Vir | PFAM    | 1     | 328 | 2.9E-57  |
| 29 | PVX_158260 | 287    | PF05795  | Plasmodium_Vir | PFAM    | 16    | 276 | 1.6E-69  |
| 30 | PVX_170270 | 332    | PF05795  | Plasmodium_Vir | PFAM    | 409   | 575 | 3.8E-27  |
| 31 | PVX_124712 | 400    | PF05795  | Plasmodium_Vir | PFAM    | 20    | 390 | 9.7E-72  |
| 32 | PVX_124715 | 528    | PF05795  | Plasmodium_Vir | PFAM    | 16    | 416 | 3.6E-88  |
| 33 | PVX_119210 | 540    | PF05795  | Plasmodium_Vir | PFAM    | 16    | 531 | 2.0E-86  |
| 34 | PVX_120340 | 452    | PF05795  | Plasmodium_Vir | PFAM    | 254   | 615 | 2.8E-82  |
| 35 | PVX_120845 | 587    | PF05795  | Plasmodium_Vir | PFAM    | 17    | 234 | 4.0E-42  |
| 36 | PVX_112630 | 650    | PF05795  | Plasmodium_Vir | PFAM    | 16    | 263 | 2.7E-65  |
| 37 | PVX_112720 | 505    | PF05795  | Plasmodium_Vir | PFAM    | 16    | 276 | 3.2E-64  |
| 38 | PVX_115485 | 302    | PF05795  | Plasmodium_Vir | PFAM    | 82    | 386 | 1.4E-20  |
| 39 | PVX_115985 | 574    | PF05795  | Plasmodium_Vir | PFAM    | 248   | 461 | 5.6E-49  |
| 40 | PVX_110295 | 553    | PF05795  | Plasmodium_Vir | PFAM    | 11    | 282 | 7.4E-14  |
| 41 | PVX_110300 | 359    | PF05795  | Plasmodium_Vir | PFAM    | 17    | 446 | 2.6E-94  |
| 42 | PVX_104190 | 426    | PF05795  | Plasmodium_Vir | PFAM    | 28    | 582 | 1.8E-67  |
| 43 | PVX_106220 | 481    | PF05795  | Plasmodium_Vir | PFAM    | 34    | 649 | 8.1E-47  |
| 44 | PVX_097540 | 668    | PF05795  | Plasmodium_Vir | PFAM    | 15    | 246 | 1.2E-37  |
| 45 | PVX_097542 | 560    | PF05795  | Plasmodium_Vir | PFAM    | 21    | 300 | 1.8E-61  |
| 46 | PVX_097545 | 451    | PF05795  | Plasmodium_Vir | PFAM    | 29    | 338 | 1.8E-52  |
| 47 | PVX_097555 | 516    | PF05795  | Plasmodium_Vir | PFAM    | 399   | 568 | 6.9E-23  |
| 48 | PVX_097525 | 508    | PF05795  | Plasmodium_Vir | PFAM    | 17    | 552 | 9.0E-55  |
| 49 | PVX_097530 | 524    | PF05795  | Plasmodium_Vir | PFAM    | 26    | 359 | 5.4E-75  |
| 50 | PVX_090315 | 487    | PF05795  | Plasmodium_Vir | PFAM    | 16    | 426 | 1.9E-67  |
| 51 | PVX_090335 | 435    | PF05795  | Plasmodium_Vir | PFAM    | 21    | 281 | 5.0E-70  |
|    |            |        |          |                |         | 385   | 474 | 1.2E-8   |
|    |            |        |          |                |         | 321   | 635 | 2.1E-77  |
|    |            |        |          |                |         | 244   | 558 | 2.6E-60  |
|    |            |        |          |                |         | 7     | 207 | 2.4E-30  |
|    |            |        |          |                |         | 16    | 225 | 9.3E-38  |
|    |            |        |          |                |         | 16    | 502 | 3.3E-92  |
|    |            |        |          |                |         | 36    | 352 | 1.6E-30  |
|    |            |        |          |                |         | 51    | 481 | 5.01E-82 |
|    |            |        |          |                |         | 19    | 427 | 9.1E-77  |

|     |            |     |         |                |      |     |     |          |
|-----|------------|-----|---------|----------------|------|-----|-----|----------|
| 52  | PVX_023185 | 476 | PF05795 | Plasmodium_Vir | PFAM | 19  | 471 | 1.7E-104 |
| 53  | PVX_024685 | 419 | PF05795 | Plasmodium_Vir | PFAM | 2   | 413 | 3.8E-82  |
| 54  | PVX_027190 | 200 | PF05795 | Plasmodium_Vir | PFAM | 19  | 194 | 3.9E-30  |
| 55  | PVX_004495 | 449 | PF05795 | Plasmodium_Vir | PFAM | 6   | 443 | 5.3E-46  |
| 56  | PVX_004537 | 466 | PF05795 | Plasmodium_Vir | PFAM | 16  | 371 | 1.3E-54  |
| 57  | PVX_005045 | 445 | PF05795 | Plasmodium_Vir | PFAM | 22  | 249 | 3.5E-54  |
| 58  | PVX_003495 | 635 | PF05795 | Plasmodium_Vir | PFAM | 7   | 229 | 8.0E-11  |
| 59  | PVX_003505 | 414 | PF05795 | Plasmodium_Vir | PFAM | 253 | 609 | 2.9E-87  |
| 60  | PVX_081850 | 608 | PF05795 | Plasmodium_Vir | PFAM | 140 | 358 | 1.1E-51  |
| 61  | PVX_083575 | 510 | PF05795 | Plasmodium_Vir | PFAM | 29  | 262 | 6.6E-14  |
| 62  | PVX_083580 | 575 | PF05795 | Plasmodium_Vir | PFAM | 288 | 608 | 6.0E-55  |
| 63  | PVX_083590 | 452 | PF05795 | Plasmodium_Vir | PFAM | 11  | 462 | 1.5E-64  |
| 64  | PVX_042190 | 450 | PF05795 | Plasmodium_Vir | PFAM | 23  | 235 | 2.0E-9   |
| 65  | PVX_049690 | 366 | PF05795 | Plasmodium_Vir | PFAM | 281 | 568 | 1.1E-63  |
| 66  | PVX_054190 | 396 | PF05795 | Plasmodium_Vir | PFAM | 23  | 452 | 2.1E-97  |
| 67  | PVX_061690 | 273 | PF05795 | Plasmodium_Vir | PFAM | 2   | 445 | 2.8E-92  |
| 68  | PVX_015635 | 529 | PF05795 | Plasmodium_Vir | PFAM | 124 | 360 | 2.6E-17  |
| 69  | PVX_017140 | 568 | PF05795 | Plasmodium_Vir | PFAM | 4   | 391 | 1.2E-86  |
| 70  | PVX_101565 | 473 | PF05795 | Plasmodium_Vir | PFAM | 28  | 268 | 3.3E-33  |
| 71  | PVX_106725 | 469 | PF05795 | Plasmodium_Vir | PFAM | 16  | 277 | 3.7E-71  |
| 72  | PVX_124705 | 449 | PF05795 | Plasmodium_Vir | PFAM | 411 | 528 | 9.5E-9   |
| 73  | PVX_103155 | 442 | PF05795 | Plasmodium_Vir | PFAM | 16  | 292 | 2.8E-69  |
| 74  | PVX_104180 | 386 | PF05795 | Plasmodium_Vir | PFAM | 386 | 562 | 2.4E-28  |
| 75  | PVX_094245 | 584 | PF05795 | Plasmodium_Vir | PFAM | 22  | 419 | 1.7E-57  |
| 76  | PVX_094250 | 525 | PF05795 | Plasmodium_Vir | PFAM | 18  | 257 | 5.2E-46  |
| 77  | PVX_090290 | 288 | PF05795 | Plasmodium_Vir | PFAM | 16  | 443 | 3.4E-89  |
| 78  | PVX_090295 | 542 | PF05795 | Plasmodium_Vir | PFAM | 22  | 436 | 2.1E-80  |
| 79  | PVX_090305 | 462 | PF05795 | Plasmodium_Vir | PFAM | 27  | 243 | 1.8E-29  |
| 80  | PVX_090310 | 449 | PF05795 | Plasmodium_Vir | PFAM | 18  | 578 | 3.5E-70  |
| 81  | PVX_172270 | 378 | PF05795 | Plasmodium_Vir | PFAM | 10  | 274 | 9.0E-16  |
| 82  | PVX_183280 | 443 | PF05795 | Plasmodium_Vir | PFAM | 2   | 280 | 2.2E-52  |
| 83  | PVX_214290 | 771 | PF05795 | Plasmodium_Vir | PFAM | 24  | 239 | 3.8E-11  |
| 84  | PVX_133260 | 268 | PF05795 | Plasmodium_Vir | PFAM | 269 | 536 | 6.4E-52  |
| 85  | PVX_134260 | 104 | PF05795 | Plasmodium_Vir | PFAM | 16  | 457 | 1.6E-63  |
| 86  | PVX_157260 | 315 | PF05795 | Plasmodium_Vir | PFAM | 2   | 210 | 6.42E-34 |
| 87  | PVX_096910 | 506 | PF05795 | Plasmodium_Vir | PFAM | 10  | 375 | 1.7E-64  |
| 88  | PVX_096920 | 491 | PF05795 | Plasmodium_Vir | PFAM | 2   | 437 | 2.9E-43  |
| 89  | PVX_088785 | 314 | PF05795 | Plasmodium_Vir | PFAM | 9   | 185 | 5.4E-6   |
| 90  | PVX_088805 | 358 | PF05795 | Plasmodium_Vir | PFAM | 203 | 319 | 5.0E-21  |
| 91  | PVX_107745 | 351 | PF05795 | Plasmodium_Vir | PFAM | 433 | 625 | 1.6E-23  |
| 92  | PVX_107755 | 657 | PF05795 | Plasmodium_Vir | PFAM | 17  | 259 | 3.5E-62  |
| 93  | PVX_063190 | 483 | PF05795 | Plasmodium_Vir | PFAM | 17  | 103 | 9.0E-21  |
| 94  | PVX_065690 | 394 | PF05795 | Plasmodium_Vir | PFAM | 3   | 173 | 1.5E-43  |
| 95  | PVX_037690 | 67  | PF05795 | Plasmodium_Vir | PFAM | 21  | 193 | 4.4E-11  |
| 96  | PVX_038190 | 58  | PF05795 | Plasmodium_Vir | PFAM | 174 | 464 | 7.4E-63  |
| 97  | PVX_041690 | 379 | PF05795 | Plasmodium_Vir | PFAM | 16  | 308 | 7.4E-32  |
| 98  | PVX_034690 | 404 | PF05795 | Plasmodium_Vir | PFAM | 6   | 312 | 1.6E-57  |
| 99  | PVX_036690 | 98  | PF05795 | Plasmodium_Vir | PFAM | 17  | 358 | 8.45E-76 |
| 100 | PVX_022185 | 352 | PF05795 | Plasmodium_Vir | PFAM | 19  | 351 | 2.2E-58  |
| 101 | PVX_022685 | 630 | PF05795 | Plasmodium_Vir | PFAM | 68  | 279 | 2.6E-6   |
| 102 | PVX_005055 | 534 | PF05795 | Plasmodium_Vir | PFAM | 290 | 656 | 4.0E-94  |
| 103 | PVX_005060 | 451 | PF05795 | Plasmodium_Vir | PFAM | 22  | 478 | 2.6E-103 |
| 104 | PVX_007085 | 321 | PF05795 | Plasmodium_Vir | PFAM | 10  | 389 | 1.1E-64  |
| 105 | PVX_002490 | 464 | PF05795 | Plasmodium_Vir | PFAM | 1   | 62  | 1.1E-17  |
| 106 | PVX_003490 | 612 | PF05795 | Plasmodium_Vir | PFAM | 4   | 53  | 3.8E-11  |
| 107 | PVX_001625 | 460 | PF05795 | Plasmodium_Vir | PFAM | 7   | 372 | 1.6E-60  |
| 108 | PVX_001635 | 634 | PF05795 | Plasmodium_Vir | PFAM | 5   | 63  | 1.4E-9   |
| 109 | PVX_001640 | 227 | PF05795 | Plasmodium_Vir | PFAM | 75  | 399 | 1.2E-53  |
| 110 | PVX_124720 | 545 | PF05795 | Plasmodium_Vir | PFAM | 7   | 93  | 1.8E-20  |
| 111 | PVX_124725 | 220 | PF05795 | Plasmodium_Vir | PFAM | 13  | 348 | 4.6E-55  |
| 112 | PVX_125726 | 364 | PF05795 | Plasmodium_Vir | PFAM | 16  | 624 | 1.7E-83  |
| 113 | PVX_075695 | 436 | PF05795 | Plasmodium_Vir | PFAM | 25  | 522 | 3.5E-44  |
| 114 | PVX_076195 | 459 | PF05795 | Plasmodium_Vir | PFAM | 16  | 391 | 4.0E-79  |
|     |            |     |         |                | PFAM | 3   | 320 | 2.2E-68  |
|     |            |     |         |                | PFAM | 13  | 452 | 8.9E-38  |
|     |            |     |         |                | PFAM | 24  | 217 | 7.2E-14  |
|     |            |     |         |                | PFAM | 410 | 598 | 1.6E-38  |
|     |            |     |         |                | PFAM | 16  | 452 | 5.2E-97  |
|     |            |     |         |                | PFAM | 24  | 267 | 2.5E-28  |
|     |            |     |         |                | PFAM | 278 | 623 | 1.0E-58  |
|     |            |     |         |                | PFAM | 16  | 178 | 6.2E-37  |
|     |            |     |         |                | PFAM | 19  | 241 | 6.5E-43  |
|     |            |     |         |                | PFAM | 1   | 182 | 2.5E-34  |
|     |            |     |         |                | PFAM | 2   | 359 | 6.8E-31  |
|     |            |     |         |                | PFAM | 22  | 431 | 3.2E-78  |
|     |            |     |         |                | PFAM | 17  | 446 | 1.3E-94  |

## 1.4 G

| #  | Gene ID    | Length | Match ID | Match Name            | DB Name | Start | End | Score   |
|----|------------|--------|----------|-----------------------|---------|-------|-----|---------|
| 1  | PVX_024185 | 427    | PF05795  | Plasmodium_Vir        | PFAM    | 18    | 289 | 3.6E-14 |
| 2  | PVX_035190 | 410    | PF05795  | Plasmodium_Vir        | PFAM    | 7     | 179 | 6.1E-7  |
| 3  | PVX_079195 | 427    | PF05795  | Plasmodium_Vir        | PFAM    | 35    | 390 | 9.5E-14 |
| 4  | PVX_007080 | 451    | PF05795  | Plasmodium_Vir        | PFAM    | 13    | 451 | 3.4E-16 |
| 5  | PVX_039190 | 438    | PF05795  | Plasmodium_Vir        | PFAM    | 13    | 422 | 2.1E-19 |
| 6  | PVX_048690 | 408    | PF05795  | Plasmodium_Vir        | PFAM    | 17    | 408 | 3.3E-41 |
| 7  | PVX_007585 | 447    | PF05795  | Plasmodium_Vir        | PFAM    | 32    | 446 | 4.0E-13 |
| 8  | PVX_012115 | 506    | PF05795  | Plasmodium_Vir        | PFAM    | 32    | 501 | 1.9E-13 |
| 9  | PVX_014125 | 498    | coil     | coiled-coil           | COIL    | 259   | 307 | NA      |
|    |            |        | seg      | seg                   | SEG     | 76    | 86  | NA      |
|    |            |        | seg      | seg                   | SEG     | 92    | 106 | NA      |
|    |            |        | seg      | seg                   | SEG     | 217   | 234 | NA      |
|    |            |        | seg      | seg                   | SEG     | 253   | 305 | NA      |
|    |            |        | seg      | seg                   | SEG     | 333   | 344 | NA      |
|    |            |        | seg      | seg                   | SEG     | 411   | 423 | NA      |
|    |            |        | tmhmm    | transmembrane_regions | TMHMM   | 21    | 39  | NA      |
|    |            |        | tmhmm    | transmembrane_regions | TMHMM   | 45    | 67  | NA      |
|    |            |        | tmhmm    | transmembrane_regions | TMHMM   | 101   | 121 | NA      |
|    |            |        | tmhmm    | transmembrane_regions | TMHMM   | 436   | 456 | NA      |
| 10 | PVX_102130 | 456    | PF05795  | Plasmodium_Vir        | PFAM    | 60    | 253 | 3.0E-10 |
| 11 | PVX_103670 | 459    | PF05795  | Plasmodium_Vir        | PFAM    | 48    | 449 | 1.4E-6  |
| 12 | PVX_106210 | 434    | PF05795  | Plasmodium_Vir        | PFAM    | 12    | 215 | 7.8E-7  |
| 13 | PVX_108255 | 442    | PF05795  | Plasmodium_Vir        | PFAM    | 18    | 409 | 1.7E-14 |

|    |            |     |         |                       |       |     |     |         |
|----|------------|-----|---------|-----------------------|-------|-----|-----|---------|
| 14 | PVX_059190 | 438 | PF05795 | Plasmodium_Vir        | PFAM  | 13  | 408 | 1.1E-16 |
| 15 | PVX_063690 | 456 | PF05795 | Plasmodium_Vir        | PFAM  | 34  | 440 | 7.1E-19 |
| 16 | PVX_028690 | 464 | PF05795 | Plasmodium_Vir        | PFAM  | 53  | 431 | 3.5E-8  |
| 17 | PVX_032190 | 497 | PF05795 | Plasmodium_Vir        | PFAM  | 76  | 492 | 2.3E-22 |
| 18 | PVX_014630 | 464 | PF05795 | Plasmodium_Vir        | PFAM  | 20  | 430 | 6.3E-8  |
| 19 | PVX_018655 | 515 | PF05795 | Plasmodium_Vir        | PFAM  | 34  | 510 | 5.0E-19 |
| 20 | PVX_112115 | 320 | PF05795 | Plasmodium_Vir        | PFAM  | 20  | 313 | 2.2E-9  |
| 21 | PVX_121345 | 449 | PF05795 | Plasmodium_Vir        | PFAM  | 15  | 443 | 1.0E-14 |
| 22 | PVX_174270 | 458 | seg     | seg                   | SEG   | 149 | 165 | NA      |
|    |            |     | seg     | seg                   | SEG   | 219 | 230 | NA      |
|    |            |     | seg     | seg                   | SEG   | 384 | 399 | NA      |
|    |            |     | seg     | seg                   | SEG   | 406 | 417 | NA      |
|    |            |     | tmhmm   | transmembrane_regions | TMHMM | 155 | 175 | NA      |
|    |            |     | tmhmm   | transmembrane_regions | TMHMM | 189 | 207 | NA      |
|    |            |     | tmhmm   | transmembrane_regions | TMHMM | 353 | 371 | NA      |
|    |            |     | tmhmm   | transmembrane_regions | TMHMM | 375 | 395 | NA      |
| 23 | PVX_050690 |     |         |                       |       |     |     |         |
| 24 | PVX_047190 |     |         |                       |       |     |     |         |
| 25 | PVX_071190 |     |         |                       |       |     |     |         |
| 26 | PVX_026690 |     |         |                       |       |     |     |         |
| 27 | PVX_033690 |     |         |                       |       |     |     |         |
| 28 | PVX_073190 |     |         |                       |       |     |     |         |
| 29 | PVX_031190 |     |         |                       |       |     |     |         |
| 30 | PVX_030690 |     |         |                       |       |     |     |         |
| 31 | PVX_029690 |     |         |                       |       |     |     |         |
| 32 | PVX_070190 |     |         |                       |       |     |     |         |
| 33 | PVX_104695 |     |         |                       |       |     |     |         |
| 34 | PVX_057190 |     |         |                       |       |     |     |         |
| 35 | PVX_056190 |     |         |                       |       |     |     |         |
| 36 | PVX_040190 |     |         |                       |       |     |     |         |
| 37 | PVX_060190 |     |         |                       |       |     |     |         |
| 38 | PVX_102645 |     |         |                       |       |     |     |         |

## 1.5 I

| #  | Gene ID         | Length | Match ID        | Match Name            | DB Name | Start | End | Score   |
|----|-----------------|--------|-----------------|-----------------------|---------|-------|-----|---------|
| 1  | 7077_PVX_014625 | 375    | PF05795         | Plasmodium_Vir        | PFAM    | 13    | 362 | 2.7E-40 |
| 2  | 7077_PVX_064190 | 364    | PF05795         | Plasmodium_Vir        | PFAM    | 13    | 363 | 4.6E-42 |
| 3  | 7077_PVX_002495 | 324    | PF05795         | Plasmodium_Vir        | PFAM    | 18    | 310 | 1.5E-40 |
| 4  | 7077_PVX_023685 | 292    | PF05795         | Plasmodium_Vir        | PFAM    | 2     | 291 | 4.2e-31 |
| 5  | 7077_PVX_032690 | 156    | PF05795         | Plasmodium_Vir        | PFAM    | 20    | 155 | 8.1E-12 |
| 6  | 7077_PVX_072190 | 362    | PF05795         | Plasmodium_Vir        | PFAM    | 13    | 361 | 2.5E-41 |
| 7  | 7077_PVX_102630 | 345    | PF05795         | Plasmodium_Vir        | PFAM    | 44    | 343 | 3.6e-23 |
| 8  | 7077_PVX_064690 | 363    | SignalP-NN(euk) | signal-peptide        | SIGNALP | 1     | 22  | NA      |
| 9  | 7077_PVX_069190 | 343    | PF05795         | Plasmodium_Vir        | PFAM    | 13    | 361 | 6.0E-40 |
| 10 | 7077_PVX_048190 | 117    | PF05795         | Plasmodium_Vir        | PFAM    | 31    | 343 | 1.4E-29 |
| 11 | 7077_PVX_053190 | 344    | PF05795         | Plasmodium_Vir        | PFAM    | 13    | 111 | 6.1E-10 |
| 12 | 7077_PVX_055690 | 192    | PF05795         | Plasmodium_Vir        | PFAM    | 16    | 342 | 2.5E-35 |
| 13 | 7077_PVX_150260 | 192    | PF05795         | Plasmodium_Vir        | PFAM    | 3     | 190 | 1.7E-8  |
| 14 | 7077_PVX_177275 | 361    | PF05795         | Plasmodium_Vir        | PFAM    | 17    | 360 | 2.4E-37 |
| 15 | 7077_PVX_248300 | 328    | PF05795         | Plasmodium_Vir        | PFAM    | 11    | 326 | 4.2E-31 |
|    |                 | 396    | PF05795         | Plasmodium_Vir        | PFAM    | 16    | 396 | 1.4e-40 |
|    |                 |        | seg             | seg                   | SEG     | 284   | 300 | NA      |
|    |                 |        | seg             | seg                   | SEG     | 333   | 344 | NA      |
|    |                 |        | tmhmm           | transmembrane_regions | TMHMM   | 308   | 328 | NA      |
|    |                 |        | tmhmm           | transmembrane_regions | TMHMM   | 333   | 353 | NA      |
| 16 | PVX_054690      |        |                 |                       |         |       |     |         |
| 17 | PVX_039690      |        |                 |                       |         |       |     |         |

## 1.6 J

| #  | Gene ID    | Length | Match ID        | Match Name            | DB Name | Start | End | Score   |
|----|------------|--------|-----------------|-----------------------|---------|-------|-----|---------|
| 1  | PVX_010605 | 286    | PF05795         | Plasmodium_Vir        | PFAM    | 16    | 187 | 1.1E-8  |
|    |            |        | PF05795         | Plasmodium_Vir        | PFAM    | 200   | 283 | 1.2E-8  |
| 2  | PVX_107750 | 301    | PF05795         | Plasmodium_Vir        | PFAM    | 19    | 210 | 6.6E-22 |
|    |            |        | PF05795         | Plasmodium_Vir        | PFAM    | 214   | 297 | 2.0E-8  |
| 3  | PVX_000020 | 234    | PF05795         | Plasmodium_Vir        | PFAM    | 22    | 182 | 1.3E-10 |
| 4  | PVX_057690 | 301    | PF05795         | Plasmodium_Vir        | PFAM    | 22    | 201 | 6.9E-7  |
| 5  | PVX_067690 | 266    | PF05795         | Plasmodium_Vir        | PFAM    | 28    | 202 | 1.3E-7  |
| 6  | PVX_109795 | 301    | PF05795         | Plasmodium_Vir        | PFAM    | 19    | 199 | 6.6E-10 |
|    |            |        | PF05795         | Plasmodium_Vir        | PFAM    | 224   | 298 | 2.7E-6  |
| 7  | PVX_167265 | 278    | PF05795         | Plasmodium_Vir        | PFAM    | 10    | 193 | 2.1E-11 |
|    |            |        | PF05795         | Plasmodium_Vir        | PFAM    | 201   | 277 | 4.9E-8  |
| 8  | PVX_168270 | 334    | PF05795         | Plasmodium_Vir        | PFAM    | 16    | 330 | 3.3e-08 |
|    |            |        | seg             | seg                   | SEG     | 277   | 288 | NA      |
|    |            |        | tmhmm           | transmembrane_regions | TMHMM   | 240   | 260 | NA      |
|    |            |        | tmhmm           | transmembrane_regions | TMHMM   | 270   | 288 | NA      |
| 9  | PVX_185285 | 343    | PF05795         | Plasmodium_Vir        | PFAM    | 58    | 224 | 1.3e-06 |
|    |            |        | seg             | seg                   | SEG     | 2     | 12  | NA      |
|    |            |        | seg             | seg                   | SEG     | 231   | 251 | NA      |
|    |            |        | seg             | seg                   | SEG     | 255   | 264 | NA      |
|    |            |        | SignalP-NN(euk) | signal-peptide        | SIGNALP | 1     | 18  | NA      |
|    |            |        | tmhmm           | transmembrane_regions | TMHMM   | 4     | 24  | NA      |
|    |            |        | tmhmm           | transmembrane_regions | TMHMM   | 232   | 252 | NA      |
|    |            |        | tmhmm           | transmembrane_regions | TMHMM   | 280   | 300 | NA      |
| 10 | PVX_096935 | 304    | PF05795         | Plasmodium_Vir        | PFAM    | 38    | 302 | 5.7E-19 |
| 11 | PVX_105705 | 191    | PF05795         | Plasmodium_Vir        | PFAM    | 23    | 185 | 3.4E-13 |
| 12 | PVX_105710 | 245    | PF05795         | Plasmodium_Vir        | PFAM    | 28    | 202 | 1.1E-11 |
| 13 | PVX_070690 | 260    | PF05795         | Plasmodium_Vir        | PFAM    | 3     | 165 | 7.4E-10 |
| 14 | PVX_096005 | 367    | PF05795         | Plasmodium_Vir        | PFAM    | 56    | 333 | 8.5E-9  |
| 15 | PVX_096925 | 287    | seg             | seg                   | SEG     | 194   | 217 | NA      |
|    |            |        | tmhmm           | transmembrane_regions | TMHMM   | 196   | 218 | NA      |
|    |            |        | tmhmm           | transmembrane_regions | TMHMM   | 247   | 267 | NA      |
| 16 | PVX_096930 | 248    | PF05795         | Plasmodium_Vir        | PFAM    | 18    | 199 | 5.5E-8  |
| 17 | PVX_121355 |        |                 |                       |         |       |     |         |
| 18 | PVX_106720 |        |                 |                       |         |       |     |         |
| 19 | PVX_186290 |        |                 |                       |         |       |     |         |

## 1.7 K

| #  | Gene ID    | Length | Match ID | Match Name     | DB Name | Start | End | Score   |
|----|------------|--------|----------|----------------|---------|-------|-----|---------|
| 1  | PVX_001610 | 338    | PF05795  | Plasmodium_Vir | PFAM    | 10    | 336 | 6.6E-16 |
| 2  | PVX_042690 | 337    | PF05795  | Plasmodium_Vir | PFAM    | 35    | 336 | 2.6E-10 |
| 3  | PVX_086885 | 266    | PF05795  | Plasmodium_Vir | PFAM    | 11    | 220 | 2.3E-8  |
| 4  | PVX_115990 | 271    | PF05795  | Plasmodium_Vir | PFAM    | 42    | 243 | 1.5E-11 |
| 5  | PVX_145260 | 305    | PF05795  | Plasmodium_Vir | PFAM    | 23    | 304 | 4.6E-6  |
| 6  | PVX_163265 | 341    | seg      | seg            | SEG     | 246   | 258 | NA      |
| 7  | PVX_056690 |        |          |                |         |       |     |         |
| 8  | PVX_053690 |        |          |                |         |       |     |         |
| 9  | PVX_031690 |        |          |                |         |       |     |         |
| 10 | PVX_005565 |        |          |                |         |       |     |         |

## 1.8 PvPIRA

| #  | Gene ID    | Length | Match ID        | Match Name            | DB Name | Start | End | Score   |
|----|------------|--------|-----------------|-----------------------|---------|-------|-----|---------|
| 1  | PVX_011810 | 362    | PF05795         | Plasmodium_Vir        | PFAM    | 26    | 359 | 1.6E-9  |
| 2  | PVX_141260 | 385    | PF05795         | Plasmodium_Vir        | PFAM    | 11    | 382 | 7.7E-9  |
| 3  | PVX_144260 | 403    | seg             | seg                   | SEG     | 27    | 48  | NA      |
|    |            |        | seg             | seg                   | SEG     | 165   | 177 | NA      |
|    |            |        | seg             | seg                   | SEG     | 318   | 336 | NA      |
|    |            |        | SignalP-NN(euk) | signal-peptide        | SIGNALP | 1     | 38  | NA      |
|    |            |        | tmhmm           | transmembrane_regions | TMHMM   | 19    | 41  | NA      |
|    |            |        | tmhmm           | transmembrane_regions | TMHMM   | 130   | 150 | NA      |
|    |            |        | tmhmm           | transmembrane_regions | TMHMM   | 181   | 201 | NA      |
|    |            |        | tmhmm           | transmembrane_regions | TMHMM   | 302   | 320 | NA      |
|    |            |        | tmhmm           | transmembrane_regions | TMHMM   | 339   | 359 | NA      |
| 4  | PVX_155260 | 359    | seg             | seg                   | SEG     | 265   | 276 | NA      |
|    |            |        | seg             | seg                   | SEG     | 283   | 296 | NA      |
|    |            |        | seg             | seg                   | SEG     | 299   | 310 | NA      |
|    |            |        | seg             | seg                   | SEG     | 338   | 350 | NA      |
| 5  | PVX_015135 | 383    | PF05795         | Plasmodium_Vir        | PFAM    | 20    | 380 | 4.2E-15 |
| 6  | PVX_019160 | 394    | PF05795         | Plasmodium_Vir        | PFAM    | 2     | 385 | 1.5E-15 |
| 7  | PVX_139260 | 359    | seg             | seg                   | SEG     | 281   | 292 | NA      |
|    |            |        | seg             | seg                   | SEG     | 298   | 311 | NA      |
|    |            |        | tmhmm           | transmembrane_regions | TMHMM   | 253   | 271 | NA      |
|    |            |        | tmhmm           | transmembrane_regions | TMHMM   | 281   | 303 | NA      |
| 8  | PVX_186285 | 305    | seg             | seg                   | SEG     | 178   | 189 | NA      |
|    |            |        | seg             | seg                   | SEG     | 286   | 298 | NA      |
|    |            |        | SignalP-NN(euk) | signal-peptide        | SIGNALP | 1     | 17  | NA      |
|    |            |        | tmhmm           | transmembrane_regions | TMHMM   | 279   | 297 | NA      |
| 9  | PVX_171270 | 244    | seg             | seg                   | SEG     | 211   | 218 | NA      |
| 10 | PVX_181275 | 470    | seg             | seg                   | SEG     | 17    | 35  | NA      |
|    |            |        | seg             | seg                   | SEG     | 430   | 449 | NA      |
| 11 | PVX_161260 |        |                 |                       |         |       |     |         |
| 12 | PVX_160260 |        |                 |                       |         |       |     |         |
| 13 | PVX_112645 |        |                 |                       |         |       |     |         |
| 14 | PVX_018155 |        |                 |                       |         |       |     |         |
| 15 | PVX_153260 |        |                 |                       |         |       |     |         |

## 1.9 PvPIRD

| #  | Gene ID    | Length | Match ID | Match Name | DB Name | Start | End | Score   |
|----|------------|--------|----------|------------|---------|-------|-----|---------|
| 1  | PVX_038690 | 199    | PF12420  | DUF3671    | PFAM    | 99    | 171 | 1.4E-18 |
| 2  | PVX_047690 | 267    | PF12420  | DUF3671    | PFAM    | 128   | 242 | 9.5E-35 |
| 3  | PVX_074695 | 257    | PF12420  | DUF3671    | PFAM    | 115   | 237 | 1.3E-29 |
| 4  | PVX_102635 | 198    | PF12420  | DUF3671    | PFAM    | 79    | 196 | 1.5E-24 |
| 5  | PVX_103160 | 254    | PF12420  | DUF3671    | PFAM    | 116   | 230 | 4.3E-29 |
| 6  | PVX_017645 | 230    | PF12420  | DUF3671    | PFAM    | 94    | 208 | 1.9E-28 |
| 7  | PVX_019665 | 282    | PF12420  | DUF3671    | PFAM    | 123   | 260 | 1.8E-37 |
| 8  | PVX_108760 | 261    | PF12420  | DUF3671    | PFAM    | 114   | 253 | 1.0E-34 |
| 9  | PVX_109778 | 240    | PF12420  | DUF3671    | PFAM    | 123   | 232 | 9.1E-19 |
| 10 | PVX_109780 | 266    | PF12420  | DUF3671    | PFAM    | 106   | 244 | 5.6E-37 |
| 11 | PVX_146260 | 239    | PF12420  | DUF3671    | PFAM    | 122   | 190 | 4.5E-26 |
| 12 | PVX_178275 | 267    | PF12420  | DUF3671    | PFAM    | 122   | 240 | 1.7E-32 |
| 13 | PVX_182275 | 151    | PF12420  | DUF3671    | PFAM    | 10    | 129 | 3.4E-29 |
| 14 | PVX_103145 | 168    | PF12420  | DUF3671    | PFAM    | 94    | 143 | 9.3E-11 |
| 15 | PVX_086850 | 245    | PF12420  | DUF3671    | PFAM    | 105   | 220 | 2.3E-33 |
| 16 | PVX_058190 | 123    | PF12420  | DUF3671    | PFAM    | 24    | 99  | 2E-20   |
| 17 | PVX_067190 | 235    | PF12420  | DUF3671    | PFAM    | 78    | 213 | 1.2E-34 |
| 18 | PVX_040690 | 166    | PF12420  | DUF3671    | PFAM    | 115   | 165 | 2.5E-13 |
| 19 | PVX_041190 | 144    | PF12420  | DUF3671    | PFAM    | 6     | 119 | 3.3E-37 |
| 20 | PVX_109785 | 261    | PF12420  | DUF3671    | PFAM    | 123   | 236 | 2.8E-38 |
| 21 | PVX_143260 | 248    | PF12420  | DUF3671    | PFAM    | 112   | 226 | 5.6E-30 |

## 1.10 PvPIRH

NO MATCHES

## 2 Homology Blocks summary

**Description:** illustrative summary of the representative HBs in each (sub)family. In order to create this figure, *representative* HBs were considered to be those present in at least the 50% of the sequences in the (sub)family. In other words, for each (sub)family, those HBs that appear in at least the 50% of sequences were selected and printed in the figure. Note that this does **not** mean that these *representative* HBs are specific of the (sub)family. In addition, PFAM domains which yielded the highest similarity to these HBs are indicated. Most of them correspond to a “*Plasmodium* Vir domain” entry in PFAM and domains of unknown function. Finally, note that this is just an illustration which intends to reflect the main similarities/differences among the (sub)families. Boxes representing the same motif appear aligned and filled with the same color. Further details can be found in Additional files 4, 5 and in the table below.

Z

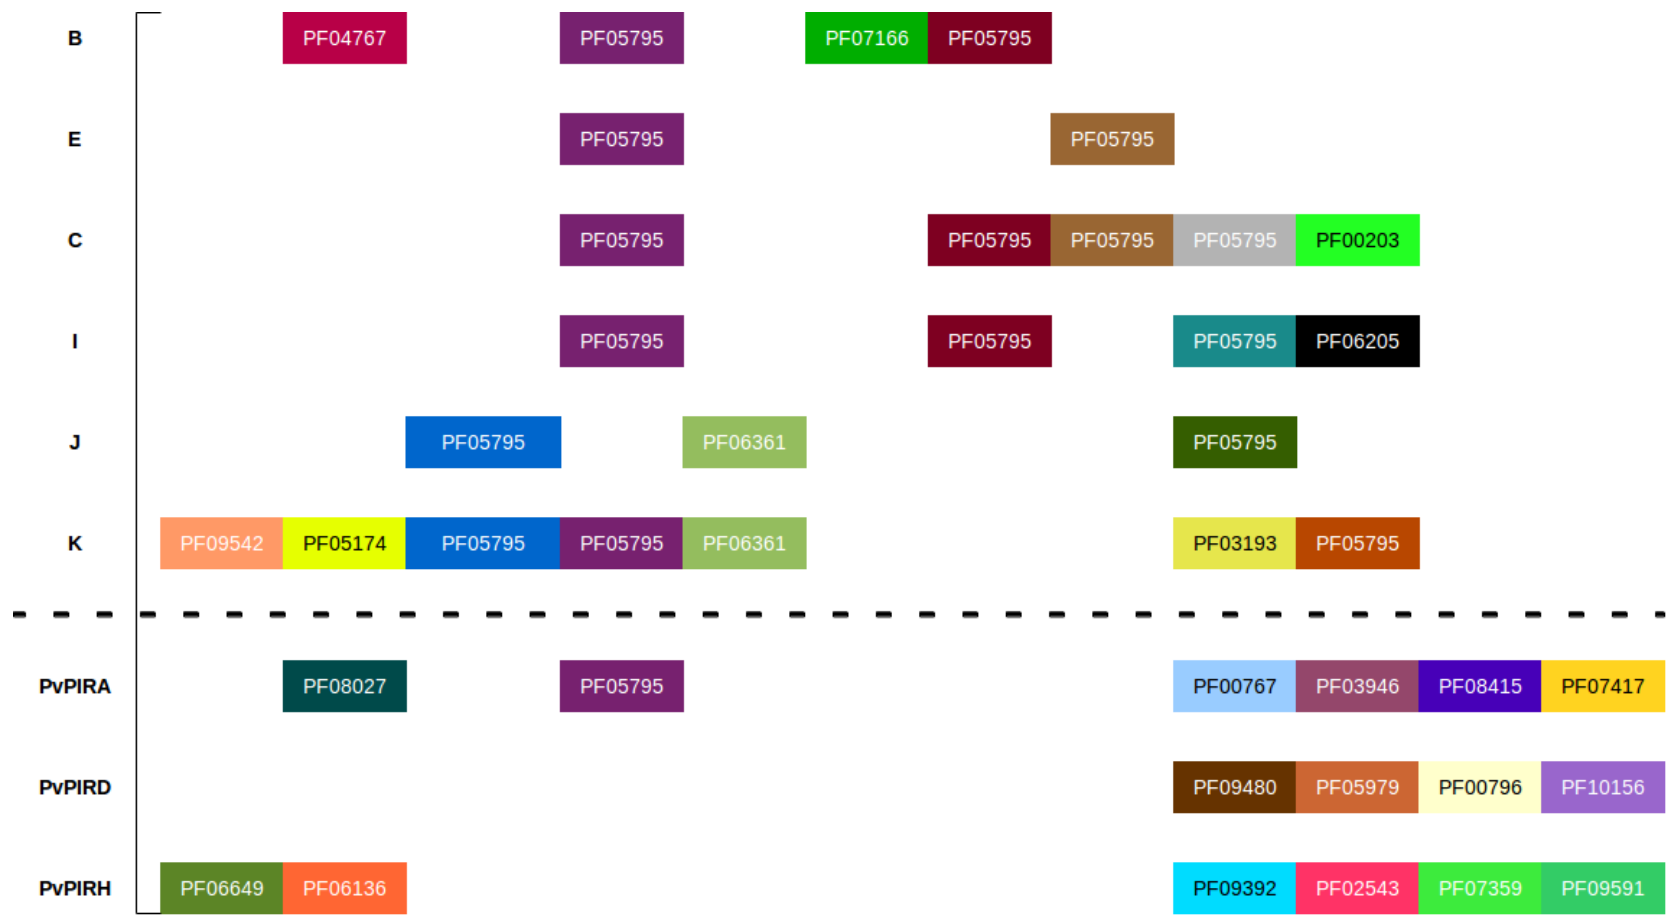

### 3 Homology Blocks detailed view

**Description:** composition of clusters and the conserved motif structure of each of the proteins in the original VIR set, as well as the hypothetical proteins grouped with them. A table is shown with the following columns:

- #: counter. Colors in this column indicate the membership to a certain cluster.
- Subfam.: indicates the original subfamily to which the corresponding gene was associated.
- Gene ID: PlasmoDB identifier.
- Name: annotation obtained from PlasmoDB 7.2.
- Length: number of aa.
- Graphic: represents the HB structure of the protein. Colored boxes indicate the presence of an HB. The thicker the box, the higher is the number of proteins found containing the corresponding HB.
- HB color: each row in this column corresponds to one of the HBs painted in the "Graphic" column.
- Starts, Ends: coordinates (in aa) that indicate the exact position of the HB in the protein. Note that HBs may overlap. Moreover, some of them may seem to be repeated, but actually represent HBs that present slight differences among them.
- Score: the number of proteins found to contain the corresponding HB.



| #   | Subfam. | Gene ID    | Name                                       | Length | Graphic                                                                              | HB color | Starts | Ends | Score |
|-----|---------|------------|--------------------------------------------|--------|--------------------------------------------------------------------------------------|----------|--------|------|-------|
| 1   | E       | PVX_074690 | variable surface protein<br>Vir4-related   | 427    |    | 140      | 162    | 39   |       |
|     |         |            |                                            |        |                                                                                      | 10       | 29     | 7    |       |
|     |         |            |                                            |        |                                                                                      | 405      | 427    | 30   |       |
|     |         |            |                                            |        |                                                                                      | 389      | 403    | 32   |       |
|     |         |            |                                            |        |                                                                                      | 389      | 404    | 32   |       |
|     |         |            |                                            |        |                                                                                      | 347      | 365    | 5    |       |
|     |         |            |                                            |        |                                                                                      | 30       | 74     | 21   |       |
|     |         |            |                                            |        |                                                                                      | 389      | 403    | 32   |       |
|     |         |            |                                            |        |                                                                                      | 389      | 403    | 32   |       |
|     |         |            |                                            |        |                                                                                      | 405      | 427    | 30   |       |
|     |         |            |                                            |        |                                                                                      | 171      | 197    | 40   |       |
|     |         |            |                                            |        |                                                                                      | 175      | 197    | 40   |       |
|     |         |            |                                            |        |                                                                                      | 389      | 403    | 32   |       |
|     |         |            |                                            |        |                                                                                      | 389      | 403    | 32   |       |
|     |         |            |                                            |        |                                                                                      | 348      | 365    | 5    |       |
|     |         |            |                                            |        |                                                                                      | 202      | 224    | 46   |       |
|     |         |            |                                            |        |                                                                                      | 227      | 267    | 9    |       |
|     |         |            |                                            |        |                                                                                      | 202      | 228    | 46   |       |
|     |         |            |                                            |        |                                                                                      | 369      | 384    | 5    |       |
|     |         |            |                                            |        |                                                                                      | 84       | 95     | 72   |       |
| 103 | 135     | 18         |                                            |        |                                                                                      |          |        |      |       |
| 84  | 94      | 72         |                                            |        |                                                                                      |          |        |      |       |
| 2   | E       | PVX_073690 | variable surface protein Vir12-<br>related | 433    |  | 140      | 162    | 39   |       |
|     |         |            |                                            |        |                                                                                      | 10       | 29     | 7    |       |
|     |         |            |                                            |        |                                                                                      | 422      | 433    | 30   |       |
|     |         |            |                                            |        |                                                                                      | 406      | 420    | 32   |       |
|     |         |            |                                            |        |                                                                                      | 406      | 421    | 32   |       |
|     |         |            |                                            |        |                                                                                      | 347      | 365    | 5    |       |
|     |         |            |                                            |        |                                                                                      | 83       | 95     | 72   |       |
|     |         |            |                                            |        |                                                                                      | 35       | 74     | 21   |       |
|     |         |            |                                            |        |                                                                                      | 30       | 74     | 21   |       |
|     |         |            |                                            |        |                                                                                      | 406      | 420    | 32   |       |
|     |         |            |                                            |        |                                                                                      | 406      | 420    | 32   |       |
|     |         |            |                                            |        |                                                                                      | 422      | 433    | 30   |       |
|     |         |            |                                            |        |                                                                                      | 172      | 197    | 40   |       |
|     |         |            |                                            |        |                                                                                      | 175      | 197    | 40   |       |
|     |         |            |                                            |        |                                                                                      | 406      | 420    | 32   |       |
|     |         |            |                                            |        |                                                                                      | 406      | 420    | 32   |       |
|     |         |            |                                            |        |                                                                                      | 348      | 365    | 5    |       |
|     |         |            |                                            |        |                                                                                      | 204      | 224    | 46   |       |
|     |         |            |                                            |        |                                                                                      | 366      | 375    | 4    |       |
|     |         |            |                                            |        |                                                                                      | 227      | 270    | 9    |       |
| 16  | 34      | 7          |                                            |        |                                                                                      |          |        |      |       |

|                     |                     |                    |                                        |     |                                                                                      |                     |                     |                    |
|---------------------|---------------------|--------------------|----------------------------------------|-----|--------------------------------------------------------------------------------------|---------------------|---------------------|--------------------|
| 3                   | E                   | PVX_103155         | variable surface protein Vir12-related | 442 |    | 202                 | 226                 | 46                 |
|                     |                     |                    |                                        |     |                                                                                      | <a href="#">381</a> | <a href="#">401</a> | <a href="#">5</a>  |
|                     |                     |                    |                                        |     |                                                                                      | <a href="#">82</a>  | <a href="#">95</a>  | <a href="#">72</a> |
|                     |                     |                    |                                        |     |                                                                                      | <a href="#">103</a> | <a href="#">136</a> | <a href="#">18</a> |
|                     |                     |                    |                                        |     |                                                                                      | <a href="#">84</a>  | <a href="#">94</a>  | <a href="#">72</a> |
|                     |                     |                    |                                        |     |                                                                                      | <a href="#">139</a> | <a href="#">161</a> | <a href="#">39</a> |
|                     |                     |                    |                                        |     |                                                                                      | <a href="#">10</a>  | <a href="#">29</a>  | <a href="#">7</a>  |
|                     |                     |                    |                                        |     |                                                                                      | <a href="#">420</a> | <a href="#">442</a> | <a href="#">30</a> |
|                     |                     |                    |                                        |     |                                                                                      | <a href="#">404</a> | <a href="#">418</a> | <a href="#">32</a> |
|                     |                     |                    |                                        |     |                                                                                      | <a href="#">404</a> | <a href="#">419</a> | <a href="#">32</a> |
|                     |                     |                    |                                        |     |                                                                                      | <a href="#">345</a> | <a href="#">363</a> | <a href="#">5</a>  |
|                     |                     |                    |                                        |     |                                                                                      | <a href="#">83</a>  | <a href="#">98</a>  | <a href="#">72</a> |
|                     |                     |                    |                                        |     |                                                                                      | <a href="#">60</a>  | <a href="#">98</a>  | <a href="#">72</a> |
|                     |                     |                    |                                        |     |                                                                                      | <a href="#">30</a>  | <a href="#">75</a>  | <a href="#">21</a> |
|                     |                     |                    |                                        |     |                                                                                      | <a href="#">404</a> | <a href="#">418</a> | <a href="#">32</a> |
|                     |                     |                    |                                        |     |                                                                                      | <a href="#">404</a> | <a href="#">418</a> | <a href="#">32</a> |
|                     |                     |                    |                                        |     |                                                                                      | <a href="#">420</a> | <a href="#">442</a> | <a href="#">30</a> |
|                     |                     |                    |                                        |     |                                                                                      | <a href="#">174</a> | <a href="#">195</a> | <a href="#">40</a> |
|                     |                     |                    |                                        |     |                                                                                      | <a href="#">404</a> | <a href="#">418</a> | <a href="#">32</a> |
|                     |                     |                    |                                        |     |                                                                                      | <a href="#">404</a> | <a href="#">418</a> | <a href="#">32</a> |
|                     |                     |                    |                                        |     |                                                                                      | <a href="#">346</a> | <a href="#">363</a> | <a href="#">5</a>  |
| <a href="#">201</a> | <a href="#">222</a> | <a href="#">46</a> |                                        |     |                                                                                      |                     |                     |                    |
| <a href="#">364</a> | <a href="#">373</a> | <a href="#">4</a>  |                                        |     |                                                                                      |                     |                     |                    |
| <a href="#">225</a> | <a href="#">264</a> | <a href="#">9</a>  |                                        |     |                                                                                      |                     |                     |                    |
| <a href="#">82</a>  | <a href="#">97</a>  | <a href="#">72</a> |                                        |     |                                                                                      |                     |                     |                    |
| <a href="#">379</a> | <a href="#">399</a> | <a href="#">5</a>  |                                        |     |                                                                                      |                     |                     |                    |
| <a href="#">83</a>  | <a href="#">98</a>  | <a href="#">72</a> |                                        |     |                                                                                      |                     |                     |                    |
| <a href="#">102</a> | <a href="#">134</a> | <a href="#">18</a> |                                        |     |                                                                                      |                     |                     |                    |
| <a href="#">84</a>  | <a href="#">95</a>  | <a href="#">72</a> |                                        |     |                                                                                      |                     |                     |                    |
| <a href="#">137</a> | <a href="#">159</a> | <a href="#">39</a> |                                        |     |                                                                                      |                     |                     |                    |
| 4                   | E                   | PVX_090335         | variable surface protein Vir12-like    | 435 |  | <a href="#">119</a> | <a href="#">146</a> | <a href="#">13</a> |
|                     |                     |                    |                                        |     |                                                                                      | <a href="#">411</a> | <a href="#">435</a> | <a href="#">30</a> |
|                     |                     |                    |                                        |     |                                                                                      | <a href="#">167</a> | <a href="#">187</a> | <a href="#">40</a> |
|                     |                     |                    |                                        |     |                                                                                      | <a href="#">393</a> | <a href="#">408</a> | <a href="#">32</a> |
|                     |                     |                    |                                        |     |                                                                                      | <a href="#">393</a> | <a href="#">408</a> | <a href="#">32</a> |
|                     |                     |                    |                                        |     |                                                                                      | <a href="#">346</a> | <a href="#">364</a> | <a href="#">5</a>  |
|                     |                     |                    |                                        |     |                                                                                      | <a href="#">79</a>  | <a href="#">95</a>  | <a href="#">72</a> |
|                     |                     |                    |                                        |     |                                                                                      | <a href="#">57</a>  | <a href="#">98</a>  | <a href="#">72</a> |
|                     |                     |                    |                                        |     |                                                                                      | <a href="#">393</a> | <a href="#">408</a> | <a href="#">32</a> |
|                     |                     |                    |                                        |     |                                                                                      | <a href="#">393</a> | <a href="#">408</a> | <a href="#">32</a> |
|                     |                     |                    |                                        |     |                                                                                      | <a href="#">411</a> | <a href="#">435</a> | <a href="#">30</a> |
|                     |                     |                    |                                        |     |                                                                                      | <a href="#">52</a>  | <a href="#">66</a>  | <a href="#">21</a> |
|                     |                     |                    |                                        |     |                                                                                      | <a href="#">393</a> | <a href="#">408</a> | <a href="#">32</a> |
|                     |                     |                    |                                        |     |                                                                                      | <a href="#">393</a> | <a href="#">408</a> | <a href="#">32</a> |
|                     |                     |                    |                                        |     |                                                                                      | <a href="#">348</a> | <a href="#">364</a> | <a href="#">5</a>  |

|                                                                                       |                    |                     |                                        |     |                                                                                      |                                                                                       |                     |                     |                    |
|---------------------------------------------------------------------------------------|--------------------|---------------------|----------------------------------------|-----|--------------------------------------------------------------------------------------|---------------------------------------------------------------------------------------|---------------------|---------------------|--------------------|
|                                                                                       |                    |                     |                                        |     |                                                                                      |    | <a href="#">207</a> | <a href="#">224</a> | <a href="#">46</a> |
|                                                                                       |                    |                     |                                        |     |                                                                                      |    | <a href="#">365</a> | <a href="#">374</a> | <a href="#">4</a>  |
|                                                                                       |                    |                     |                                        |     |                                                                                      |    | <a href="#">227</a> | <a href="#">262</a> | <a href="#">9</a>  |
|                                                                                       |                    |                     |                                        |     |                                                                                      |    | <a href="#">81</a>  | <a href="#">94</a>  | <a href="#">72</a> |
|                                                                                       |                    |                     |                                        |     |                                                                                      |    | <a href="#">13</a>  | <a href="#">32</a>  | <a href="#">7</a>  |
|                                                                                       |                    |                     |                                        |     |                                                                                      |    | <a href="#">376</a> | <a href="#">390</a> | <a href="#">5</a>  |
|                                                                                       |                    |                     |                                        |     |                                                                                      |    | <a href="#">78</a>  | <a href="#">95</a>  | <a href="#">72</a> |
|                                                                                       |                    |                     |                                        |     |                                                                                      |    | <a href="#">101</a> | <a href="#">135</a> | <a href="#">18</a> |
|                                                                                       |                    |                     |                                        |     |                                                                                      |    | <a href="#">81</a>  | <a href="#">92</a>  | <a href="#">72</a> |
|                                                                                       |                    |                     |                                        |     |                                                                                      |    | <a href="#">173</a> | <a href="#">186</a> | <a href="#">40</a> |
| 5                                                                                     | L                  | PVX_024685          | variable surface protein Vir12-related | 419 |  |    | <a href="#">116</a> | <a href="#">135</a> | <a href="#">39</a> |
|                                                                                       |                    |                     |                                        |     |                                                                                      |    | <a href="#">91</a>  | <a href="#">125</a> | <a href="#">13</a> |
|                                                                                       |                    |                     |                                        |     |                                                                                      |    | <a href="#">397</a> | <a href="#">419</a> | <a href="#">30</a> |
|                                                                                       |                    |                     |                                        |     |                                                                                      |    | <a href="#">379</a> | <a href="#">395</a> | <a href="#">32</a> |
|                                                                                       |                    |                     |                                        |     |                                                                                      |    | <a href="#">379</a> | <a href="#">396</a> | <a href="#">32</a> |
|                                                                                       |                    |                     |                                        |     |                                                                                      |    | <a href="#">323</a> | <a href="#">340</a> | <a href="#">5</a>  |
|                                                                                       |                    |                     |                                        |     |                                                                                      |    | <a href="#">59</a>  | <a href="#">74</a>  | <a href="#">72</a> |
|                                                                                       |                    |                     |                                        |     |                                                                                      |    | <a href="#">181</a> | <a href="#">197</a> | <a href="#">46</a> |
|                                                                                       |                    |                     |                                        |     |                                                                                      |    | <a href="#">181</a> | <a href="#">197</a> | <a href="#">46</a> |
|                                                                                       |                    |                     |                                        |     |                                                                                      |   | <a href="#">35</a>  | <a href="#">98</a>  | <a href="#">72</a> |
|                                                                                       |                    |                     |                                        |     |                                                                                      |  | <a href="#">5</a>   | <a href="#">46</a>  | <a href="#">21</a> |
|                                                                                       |                    |                     |                                        |     |                                                                                      |  | <a href="#">379</a> | <a href="#">395</a> | <a href="#">32</a> |
|                                                                                       |                    |                     |                                        |     |                                                                                      |  | <a href="#">379</a> | <a href="#">395</a> | <a href="#">32</a> |
|                                                                                       |                    |                     |                                        |     |                                                                                      |  | <a href="#">397</a> | <a href="#">419</a> | <a href="#">30</a> |
|                                                                                       |                    |                     |                                        |     |                                                                                      |  | <a href="#">146</a> | <a href="#">174</a> | <a href="#">40</a> |
|                                                                                       |                    |                     |                                        |     |                                                                                      |  | <a href="#">30</a>  | <a href="#">43</a>  | <a href="#">21</a> |
|                                                                                       |                    |                     |                                        |     |                                                                                      |  | <a href="#">379</a> | <a href="#">395</a> | <a href="#">32</a> |
|                                                                                       |                    |                     |                                        |     |                                                                                      |  | <a href="#">401</a> | <a href="#">419</a> | <a href="#">30</a> |
|                                                                                       |                    |                     |                                        |     |                                                                                      |  | <a href="#">379</a> | <a href="#">395</a> | <a href="#">32</a> |
|                                                                                       |                    |                     |                                        |     |                                                                                      |  | <a href="#">324</a> | <a href="#">340</a> | <a href="#">5</a>  |
|                                                                                       |                    |                     |                                        |     |                                                                                      |  | <a href="#">341</a> | <a href="#">350</a> | <a href="#">4</a>  |
|                                                                                       |                    |                     |                                        |     |                                                                                      |  | <a href="#">206</a> | <a href="#">245</a> | <a href="#">9</a>  |
|                                                                                       |                    |                     |                                        |     |                                                                                      |  | <a href="#">58</a>  | <a href="#">73</a>  | <a href="#">72</a> |
|                                                                                       |                    |                     |                                        |     |                                                                                      |  | <a href="#">356</a> | <a href="#">376</a> | <a href="#">5</a>  |
|  | <a href="#">57</a> | <a href="#">74</a>  | <a href="#">72</a>                     |     |                                                                                      |                                                                                       |                     |                     |                    |
|  | <a href="#">79</a> | <a href="#">112</a> | <a href="#">18</a>                     |     |                                                                                      |                                                                                       |                     |                     |                    |
|  | <a href="#">60</a> | <a href="#">71</a>  | <a href="#">72</a>                     |     |                                                                                      |                                                                                       |                     |                     |                    |
| 6                                                                                     | C                  | PVX_124705          | variable surface protein Vir12-related | 449 |  |  | <a href="#">173</a> | <a href="#">189</a> | <a href="#">40</a> |
|                                                                                       |                    |                     |                                        |     |                                                                                      |  | <a href="#">135</a> | <a href="#">156</a> | <a href="#">39</a> |
|                                                                                       |                    |                     |                                        |     |                                                                                      |  | <a href="#">339</a> | <a href="#">390</a> | <a href="#">30</a> |
|                                                                                       |                    |                     |                                        |     |                                                                                      |  | <a href="#">407</a> | <a href="#">426</a> | <a href="#">32</a> |
|                                                                                       |                    |                     |                                        |     |                                                                                      |  | <a href="#">407</a> | <a href="#">428</a> | <a href="#">32</a> |
|                                                                                       |                    |                     |                                        |     |                                                                                      |  | <a href="#">25</a>  | <a href="#">69</a>  | <a href="#">21</a> |
|                                                                                       |                    |                     |                                        |     |                                                                                      |  | <a href="#">407</a> | <a href="#">426</a> | <a href="#">32</a> |
|                                                                                       |                    |                     |                                        |     |                                                                                      |  | <a href="#">408</a> | <a href="#">426</a> | <a href="#">32</a> |

|   |   |            |                                     |     |  |  |  |  |                     |                     |                    |
|---|---|------------|-------------------------------------|-----|--|--|--|--|---------------------|---------------------|--------------------|
|   |   |            |                                     |     |  |  |  |  | <a href="#">51</a>  | <a href="#">59</a>  | <a href="#">21</a> |
|   |   |            |                                     |     |  |  |  |  | <a href="#">409</a> | <a href="#">426</a> | <a href="#">32</a> |
|   |   |            |                                     |     |  |  |  |  | <a href="#">430</a> | <a href="#">449</a> | <a href="#">30</a> |
|   |   |            |                                     |     |  |  |  |  | <a href="#">409</a> | <a href="#">426</a> | <a href="#">32</a> |
|   |   |            |                                     |     |  |  |  |  | <a href="#">198</a> | <a href="#">222</a> | <a href="#">46</a> |
|   |   |            |                                     |     |  |  |  |  | <a href="#">223</a> | <a href="#">293</a> | <a href="#">9</a>  |
|   |   |            |                                     |     |  |  |  |  | <a href="#">10</a>  | <a href="#">28</a>  | <a href="#">7</a>  |
|   |   |            |                                     |     |  |  |  |  | <a href="#">78</a>  | <a href="#">92</a>  | <a href="#">72</a> |
|   |   |            |                                     |     |  |  |  |  | <a href="#">103</a> | <a href="#">131</a> | <a href="#">18</a> |
|   |   |            |                                     |     |  |  |  |  | <a href="#">78</a>  | <a href="#">89</a>  | <a href="#">72</a> |
|   |   |            |                                     |     |  |  |  |  | <a href="#">170</a> | <a href="#">189</a> | <a href="#">40</a> |
|   |   |            |                                     |     |  |  |  |  | <a href="#">163</a> | <a href="#">184</a> | <a href="#">39</a> |
|   |   |            |                                     |     |  |  |  |  | <a href="#">373</a> | <a href="#">416</a> | <a href="#">30</a> |
|   |   |            |                                     |     |  |  |  |  | <a href="#">190</a> | <a href="#">213</a> | <a href="#">40</a> |
|   |   |            |                                     |     |  |  |  |  | <a href="#">445</a> | <a href="#">464</a> | <a href="#">32</a> |
|   |   |            |                                     |     |  |  |  |  | <a href="#">445</a> | <a href="#">466</a> | <a href="#">32</a> |
|   |   |            |                                     |     |  |  |  |  | <a href="#">106</a> | <a href="#">122</a> | <a href="#">72</a> |
|   |   |            |                                     |     |  |  |  |  | <a href="#">122</a> | <a href="#">155</a> | <a href="#">18</a> |
|   |   |            |                                     |     |  |  |  |  | <a href="#">56</a>  | <a href="#">101</a> | <a href="#">21</a> |
|   |   |            |                                     |     |  |  |  |  | <a href="#">445</a> | <a href="#">464</a> | <a href="#">32</a> |
|   |   |            |                                     |     |  |  |  |  | <a href="#">446</a> | <a href="#">464</a> | <a href="#">32</a> |
|   |   |            |                                     |     |  |  |  |  | <a href="#">196</a> | <a href="#">218</a> | <a href="#">40</a> |
|   |   |            |                                     |     |  |  |  |  | <a href="#">198</a> | <a href="#">218</a> | <a href="#">40</a> |
|   |   |            |                                     |     |  |  |  |  | <a href="#">447</a> | <a href="#">464</a> | <a href="#">32</a> |
|   |   |            |                                     |     |  |  |  |  | <a href="#">468</a> | <a href="#">487</a> | <a href="#">30</a> |
|   |   |            |                                     |     |  |  |  |  | <a href="#">447</a> | <a href="#">464</a> | <a href="#">32</a> |
|   |   |            |                                     |     |  |  |  |  | <a href="#">108</a> | <a href="#">121</a> | <a href="#">72</a> |
|   |   |            |                                     |     |  |  |  |  | <a href="#">104</a> | <a href="#">122</a> | <a href="#">72</a> |
|   |   |            |                                     |     |  |  |  |  | <a href="#">127</a> | <a href="#">155</a> | <a href="#">18</a> |
|   |   |            |                                     |     |  |  |  |  | <a href="#">108</a> | <a href="#">119</a> | <a href="#">72</a> |
|   |   |            |                                     |     |  |  |  |  | <a href="#">16</a>  | <a href="#">35</a>  | <a href="#">32</a> |
|   |   |            |                                     |     |  |  |  |  | <a href="#">16</a>  | <a href="#">35</a>  | <a href="#">32</a> |
|   |   |            |                                     |     |  |  |  |  | <a href="#">16</a>  | <a href="#">35</a>  | <a href="#">32</a> |
|   |   |            |                                     |     |  |  |  |  | <a href="#">17</a>  | <a href="#">35</a>  | <a href="#">32</a> |
|   |   |            |                                     |     |  |  |  |  | <a href="#">18</a>  | <a href="#">35</a>  | <a href="#">32</a> |
|   |   |            |                                     |     |  |  |  |  | <a href="#">39</a>  | <a href="#">55</a>  | <a href="#">30</a> |
|   |   |            |                                     |     |  |  |  |  | <a href="#">18</a>  | <a href="#">35</a>  | <a href="#">32</a> |
|   |   |            |                                     |     |  |  |  |  | <a href="#">163</a> | <a href="#">183</a> | <a href="#">40</a> |
|   |   |            |                                     |     |  |  |  |  | <a href="#">135</a> | <a href="#">152</a> | <a href="#">39</a> |
|   |   |            |                                     |     |  |  |  |  | <a href="#">49</a>  | <a href="#">60</a>  | <a href="#">28</a> |
|   |   |            |                                     |     |  |  |  |  | <a href="#">280</a> | <a href="#">326</a> | <a href="#">30</a> |
|   |   |            |                                     |     |  |  |  |  | <a href="#">10</a>  | <a href="#">25</a>  | <a href="#">23</a> |
|   |   |            |                                     |     |  |  |  |  | <a href="#">13</a>  | <a href="#">40</a>  | <a href="#">23</a> |
|   |   |            |                                     |     |  |  |  |  | <a href="#">102</a> | <a href="#">163</a> | <a href="#">39</a> |
|   |   |            |                                     |     |  |  |  |  | <a href="#">359</a> | <a href="#">373</a> | <a href="#">32</a> |
| 7 | E | PVX_090315 | variable surface protein Vir12-like | 487 |  |  |  |  |                     |                     |                    |
| 8 |   | PVX_038190 | hypothetical protein                | 58  |  |  |  |  |                     |                     |                    |
| 9 | E | PVX_005060 | variable surface protein Vir12-like | 451 |  |  |  |  |                     |                     |                    |

|    |   |            |                                                   |     |                                                                                      |     |     |    |
|----|---|------------|---------------------------------------------------|-----|--------------------------------------------------------------------------------------|-----|-----|----|
|    |   |            |                                                   |     |                                                                                      | 359 | 373 | 32 |
|    |   |            |                                                   |     |                                                                                      | 359 | 373 | 32 |
|    |   |            |                                                   |     |                                                                                      | 359 | 373 | 32 |
|    |   |            |                                                   |     |                                                                                      | 159 | 182 | 40 |
|    |   |            |                                                   |     |                                                                                      | 359 | 373 | 32 |
|    |   |            |                                                   |     |                                                                                      | 380 | 393 | 30 |
|    |   |            |                                                   |     |                                                                                      | 395 | 402 | 30 |
|    |   |            |                                                   |     |                                                                                      | 359 | 373 | 32 |
|    |   |            |                                                   |     |                                                                                      | 1   | 9   | 9  |
|    |   |            |                                                   |     |                                                                                      | 1   | 11  | 9  |
|    |   |            |                                                   |     |                                                                                      | 164 | 184 | 40 |
| 10 | E | PVX_042190 | variable surface protein Vir12-related, truncated | 450 |  | 382 | 396 | 27 |
|    |   |            |                                                   |     |                                                                                      | 382 | 396 | 27 |
|    |   |            |                                                   |     |                                                                                      | 382 | 396 | 27 |
|    |   |            |                                                   |     |                                                                                      | 110 | 132 | 39 |
|    |   |            |                                                   |     |                                                                                      | 329 | 379 | 30 |
|    |   |            |                                                   |     |                                                                                      | 382 | 397 | 27 |
|    |   |            |                                                   |     |                                                                                      | 86  | 119 | 13 |
|    |   |            |                                                   |     |                                                                                      | 382 | 396 | 27 |
|    |   |            |                                                   |     |                                                                                      | 382 | 397 | 27 |
|    |   |            |                                                   |     |                                                                                      | 143 | 159 | 40 |
|    |   |            |                                                   |     |                                                                                      | 408 | 427 | 32 |
|    |   |            |                                                   |     |                                                                                      | 408 | 429 | 32 |
|    |   |            |                                                   |     |                                                                                      | 31  | 78  | 72 |
|    |   |            |                                                   |     |                                                                                      | 13  | 44  | 21 |
|    |   |            |                                                   |     |                                                                                      | 408 | 427 | 32 |
|    |   |            |                                                   |     |                                                                                      | 409 | 427 | 32 |
|    |   |            |                                                   |     |                                                                                      | 382 | 396 | 27 |
|    |   |            |                                                   |     |                                                                                      | 26  | 39  | 21 |
|    |   |            |                                                   |     |                                                                                      | 410 | 427 | 32 |
|    |   |            |                                                   |     |                                                                                      | 431 | 447 | 30 |
|    |   |            |                                                   |     |                                                                                      | 410 | 427 | 32 |
|    |   |            |                                                   |     |                                                                                      | 382 | 396 | 27 |
|    |   |            |                                                   |     |                                                                                      | 382 | 397 | 27 |
|    |   |            |                                                   |     |                                                                                      | 199 | 269 | 9  |
|    |   |            |                                                   |     |                                                                                      | 55  | 67  | 72 |
|    |   |            |                                                   |     |                                                                                      | 177 | 197 | 46 |
|    |   |            |                                                   |     |                                                                                      | 55  | 67  | 72 |
|    |   |            |                                                   |     |                                                                                      | 75  | 108 | 18 |
|    |   |            |                                                   |     |                                                                                      | 55  | 66  | 72 |
| 11 | E | PVX_023185 | variable surface protein Vir12-related            | 476 |  | 408 | 422 | 27 |
|    |   |            |                                                   |     |                                                                                      | 408 | 422 | 27 |
|    |   |            |                                                   |     |                                                                                      | 408 | 422 | 27 |
|    |   |            |                                                   |     |                                                                                      | 136 | 158 | 39 |
|    |   |            |                                                   |     |                                                                                      | 354 | 405 | 30 |

|    |   |            |                                        |     |                                                                                      |                     |                     |                    |
|----|---|------------|----------------------------------------|-----|--------------------------------------------------------------------------------------|---------------------|---------------------|--------------------|
|    |   |            |                                        |     |                                                                                      | <a href="#">408</a> | <a href="#">423</a> | <a href="#">27</a> |
|    |   |            |                                        |     |                                                                                      | <a href="#">408</a> | <a href="#">422</a> | <a href="#">27</a> |
|    |   |            |                                        |     |                                                                                      | <a href="#">408</a> | <a href="#">423</a> | <a href="#">27</a> |
|    |   |            |                                        |     |                                                                                      | <a href="#">169</a> | <a href="#">186</a> | <a href="#">40</a> |
|    |   |            |                                        |     |                                                                                      | <a href="#">434</a> | <a href="#">453</a> | <a href="#">32</a> |
|    |   |            |                                        |     |                                                                                      | <a href="#">434</a> | <a href="#">455</a> | <a href="#">32</a> |
|    |   |            |                                        |     |                                                                                      | <a href="#">202</a> | <a href="#">217</a> | <a href="#">46</a> |
|    |   |            |                                        |     |                                                                                      | <a href="#">201</a> | <a href="#">217</a> | <a href="#">46</a> |
|    |   |            |                                        |     |                                                                                      | <a href="#">57</a>  | <a href="#">116</a> | <a href="#">72</a> |
|    |   |            |                                        |     |                                                                                      | <a href="#">27</a>  | <a href="#">68</a>  | <a href="#">21</a> |
|    |   |            |                                        |     |                                                                                      | <a href="#">434</a> | <a href="#">453</a> | <a href="#">32</a> |
|    |   |            |                                        |     |                                                                                      | <a href="#">435</a> | <a href="#">453</a> | <a href="#">32</a> |
|    |   |            |                                        |     |                                                                                      | <a href="#">408</a> | <a href="#">422</a> | <a href="#">27</a> |
|    |   |            |                                        |     |                                                                                      | <a href="#">52</a>  | <a href="#">66</a>  | <a href="#">21</a> |
|    |   |            |                                        |     |                                                                                      | <a href="#">436</a> | <a href="#">453</a> | <a href="#">32</a> |
|    |   |            |                                        |     |                                                                                      | <a href="#">457</a> | <a href="#">476</a> | <a href="#">30</a> |
|    |   |            |                                        |     |                                                                                      | <a href="#">436</a> | <a href="#">453</a> | <a href="#">32</a> |
|    |   |            |                                        |     |                                                                                      | <a href="#">408</a> | <a href="#">422</a> | <a href="#">27</a> |
|    |   |            |                                        |     |                                                                                      | <a href="#">408</a> | <a href="#">423</a> | <a href="#">27</a> |
|    |   |            |                                        |     |                                                                                      | <a href="#">224</a> | <a href="#">292</a> | <a href="#">9</a>  |
|    |   |            |                                        |     |                                                                                      | <a href="#">81</a>  | <a href="#">93</a>  | <a href="#">72</a> |
|    |   |            |                                        |     |                                                                                      | <a href="#">13</a>  | <a href="#">32</a>  | <a href="#">7</a>  |
|    |   |            |                                        |     |                                                                                      | <a href="#">202</a> | <a href="#">222</a> | <a href="#">46</a> |
|    |   |            |                                        |     |                                                                                      | <a href="#">78</a>  | <a href="#">94</a>  | <a href="#">72</a> |
|    |   |            |                                        |     |                                                                                      | <a href="#">100</a> | <a href="#">134</a> | <a href="#">18</a> |
|    |   |            |                                        |     |                                                                                      | <a href="#">81</a>  | <a href="#">92</a>  | <a href="#">72</a> |
|    |   |            |                                        |     |                                                                                      | <a href="#">172</a> | <a href="#">191</a> | <a href="#">40</a> |
|    |   |            |                                        |     |                                                                                      | <a href="#">415</a> | <a href="#">429</a> | <a href="#">27</a> |
|    |   |            |                                        |     |                                                                                      | <a href="#">415</a> | <a href="#">429</a> | <a href="#">27</a> |
|    |   |            |                                        |     |                                                                                      | <a href="#">415</a> | <a href="#">429</a> | <a href="#">27</a> |
|    |   |            |                                        |     |                                                                                      | <a href="#">143</a> | <a href="#">163</a> | <a href="#">39</a> |
|    |   |            |                                        |     |                                                                                      | <a href="#">374</a> | <a href="#">412</a> | <a href="#">30</a> |
|    |   |            |                                        |     |                                                                                      | <a href="#">415</a> | <a href="#">430</a> | <a href="#">27</a> |
|    |   |            |                                        |     |                                                                                      | <a href="#">415</a> | <a href="#">429</a> | <a href="#">27</a> |
|    |   |            |                                        |     |                                                                                      | <a href="#">415</a> | <a href="#">430</a> | <a href="#">27</a> |
|    |   |            |                                        |     |                                                                                      | <a href="#">171</a> | <a href="#">190</a> | <a href="#">40</a> |
|    |   |            |                                        |     |                                                                                      | <a href="#">441</a> | <a href="#">460</a> | <a href="#">32</a> |
|    |   |            |                                        |     |                                                                                      | <a href="#">85</a>  | <a href="#">92</a>  | <a href="#">72</a> |
|    |   |            |                                        |     |                                                                                      | <a href="#">441</a> | <a href="#">462</a> | <a href="#">32</a> |
|    |   |            |                                        |     |                                                                                      | <a href="#">83</a>  | <a href="#">96</a>  | <a href="#">72</a> |
|    |   |            |                                        |     |                                                                                      | <a href="#">103</a> | <a href="#">127</a> | <a href="#">18</a> |
|    |   |            |                                        |     |                                                                                      | <a href="#">208</a> | <a href="#">225</a> | <a href="#">46</a> |
|    |   |            |                                        |     |                                                                                      | <a href="#">60</a>  | <a href="#">98</a>  | <a href="#">72</a> |
|    |   |            |                                        |     |                                                                                      | <a href="#">36</a>  | <a href="#">75</a>  | <a href="#">21</a> |
|    |   |            |                                        |     |                                                                                      | <a href="#">441</a> | <a href="#">460</a> | <a href="#">32</a> |
| 12 | L | PVX_063190 | variable surface protein Vir12-related | 483 |  |                     |                     |                    |

|    |   |            |                                        |     |                                                                                      |  |                     |                     |                    |
|----|---|------------|----------------------------------------|-----|--------------------------------------------------------------------------------------|--|---------------------|---------------------|--------------------|
|    |   |            |                                        |     |                                                                                      |  | <a href="#">442</a> | <a href="#">460</a> | <a href="#">32</a> |
|    |   |            |                                        |     |                                                                                      |  | <a href="#">415</a> | <a href="#">429</a> | <a href="#">27</a> |
|    |   |            |                                        |     |                                                                                      |  | <a href="#">443</a> | <a href="#">460</a> | <a href="#">32</a> |
|    |   |            |                                        |     |                                                                                      |  | <a href="#">463</a> | <a href="#">480</a> | <a href="#">30</a> |
|    |   |            |                                        |     |                                                                                      |  | <a href="#">443</a> | <a href="#">460</a> | <a href="#">32</a> |
|    |   |            |                                        |     |                                                                                      |  | <a href="#">415</a> | <a href="#">429</a> | <a href="#">27</a> |
|    |   |            |                                        |     |                                                                                      |  | <a href="#">415</a> | <a href="#">430</a> | <a href="#">27</a> |
|    |   |            |                                        |     |                                                                                      |  | <a href="#">232</a> | <a href="#">301</a> | <a href="#">9</a>  |
|    |   |            |                                        |     |                                                                                      |  | <a href="#">85</a>  | <a href="#">97</a>  | <a href="#">72</a> |
|    |   |            |                                        |     |                                                                                      |  | <a href="#">16</a>  | <a href="#">33</a>  | <a href="#">7</a>  |
|    |   |            |                                        |     |                                                                                      |  | <a href="#">209</a> | <a href="#">229</a> | <a href="#">46</a> |
|    |   |            |                                        |     |                                                                                      |  | <a href="#">82</a>  | <a href="#">98</a>  | <a href="#">72</a> |
|    |   |            |                                        |     |                                                                                      |  | <a href="#">105</a> | <a href="#">139</a> | <a href="#">18</a> |
|    |   |            |                                        |     |                                                                                      |  | <a href="#">85</a>  | <a href="#">96</a>  | <a href="#">72</a> |
|    |   |            |                                        |     |                                                                                      |  | <a href="#">353</a> | <a href="#">367</a> | <a href="#">27</a> |
|    |   |            |                                        |     |                                                                                      |  | <a href="#">353</a> | <a href="#">367</a> | <a href="#">27</a> |
|    |   |            |                                        |     |                                                                                      |  | <a href="#">353</a> | <a href="#">367</a> | <a href="#">27</a> |
|    |   |            |                                        |     |                                                                                      |  | <a href="#">78</a>  | <a href="#">92</a>  | <a href="#">72</a> |
|    |   |            |                                        |     |                                                                                      |  | <a href="#">133</a> | <a href="#">155</a> | <a href="#">39</a> |
|    |   |            |                                        |     |                                                                                      |  | <a href="#">300</a> | <a href="#">350</a> | <a href="#">30</a> |
|    |   |            |                                        |     |                                                                                      |  | <a href="#">353</a> | <a href="#">367</a> | <a href="#">27</a> |
|    |   |            |                                        |     |                                                                                      |  | <a href="#">353</a> | <a href="#">367</a> | <a href="#">27</a> |
|    |   |            |                                        |     |                                                                                      |  | <a href="#">353</a> | <a href="#">367</a> | <a href="#">27</a> |
|    |   |            |                                        |     |                                                                                      |  | <a href="#">46</a>  | <a href="#">59</a>  | <a href="#">28</a> |
|    |   |            |                                        |     |                                                                                      |  | <a href="#">382</a> | <a href="#">398</a> | <a href="#">32</a> |
|    |   |            |                                        |     |                                                                                      |  | <a href="#">382</a> | <a href="#">398</a> | <a href="#">32</a> |
|    |   |            |                                        |     |                                                                                      |  | <a href="#">92</a>  | <a href="#">125</a> | <a href="#">18</a> |
|    |   |            |                                        |     |                                                                                      |  | <a href="#">26</a>  | <a href="#">65</a>  | <a href="#">21</a> |
|    |   |            |                                        |     |                                                                                      |  | <a href="#">382</a> | <a href="#">398</a> | <a href="#">32</a> |
|    |   |            |                                        |     |                                                                                      |  | <a href="#">382</a> | <a href="#">398</a> | <a href="#">32</a> |
|    |   |            |                                        |     |                                                                                      |  | <a href="#">353</a> | <a href="#">367</a> | <a href="#">27</a> |
|    |   |            |                                        |     |                                                                                      |  | <a href="#">166</a> | <a href="#">188</a> | <a href="#">40</a> |
|    |   |            |                                        |     |                                                                                      |  | <a href="#">382</a> | <a href="#">398</a> | <a href="#">32</a> |
|    |   |            |                                        |     |                                                                                      |  | <a href="#">402</a> | <a href="#">418</a> | <a href="#">30</a> |
|    |   |            |                                        |     |                                                                                      |  | <a href="#">382</a> | <a href="#">398</a> | <a href="#">32</a> |
|    |   |            |                                        |     |                                                                                      |  | <a href="#">353</a> | <a href="#">367</a> | <a href="#">27</a> |
|    |   |            |                                        |     |                                                                                      |  | <a href="#">353</a> | <a href="#">367</a> | <a href="#">27</a> |
|    |   |            |                                        |     |                                                                                      |  | <a href="#">77</a>  | <a href="#">90</a>  | <a href="#">72</a> |
|    |   |            |                                        |     |                                                                                      |  | <a href="#">200</a> | <a href="#">258</a> | <a href="#">46</a> |
|    |   |            |                                        |     |                                                                                      |  | <a href="#">202</a> | <a href="#">222</a> | <a href="#">46</a> |
|    |   |            |                                        |     |                                                                                      |  | <a href="#">77</a>  | <a href="#">92</a>  | <a href="#">72</a> |
|    |   |            |                                        |     |                                                                                      |  | <a href="#">98</a>  | <a href="#">127</a> | <a href="#">18</a> |
|    |   |            |                                        |     |                                                                                      |  | <a href="#">78</a>  | <a href="#">89</a>  | <a href="#">72</a> |
|    |   |            |                                        |     |                                                                                      |  | <a href="#">328</a> | <a href="#">342</a> | <a href="#">27</a> |
|    |   |            |                                        |     |                                                                                      |  | <a href="#">328</a> | <a href="#">342</a> | <a href="#">27</a> |
| 13 | L | PVX_010105 | variable surface protein Vir12-related | 421 |  |  |                     |                     |                    |
| 14 | L | PVX_054190 | variable surface protein Vir14-        | 396 |  |  |                     |                     |                    |

|    |   |            |                                        |     |                                                                                      |  |                     |                     |                    |
|----|---|------------|----------------------------------------|-----|--------------------------------------------------------------------------------------|--|---------------------|---------------------|--------------------|
|    |   |            |                                        |     |                                                                                      |  | <a href="#">328</a> | <a href="#">342</a> | <a href="#">27</a> |
|    |   |            |                                        |     |                                                                                      |  | <a href="#">108</a> | <a href="#">130</a> | <a href="#">39</a> |
|    |   |            |                                        |     |                                                                                      |  | <a href="#">275</a> | <a href="#">325</a> | <a href="#">30</a> |
|    |   |            |                                        |     |                                                                                      |  | <a href="#">328</a> | <a href="#">343</a> | <a href="#">27</a> |
|    |   |            |                                        |     |                                                                                      |  | <a href="#">328</a> | <a href="#">342</a> | <a href="#">27</a> |
|    |   |            |                                        |     |                                                                                      |  | <a href="#">328</a> | <a href="#">343</a> | <a href="#">27</a> |
|    |   |            |                                        |     |                                                                                      |  | <a href="#">354</a> | <a href="#">373</a> | <a href="#">32</a> |
|    |   |            |                                        |     |                                                                                      |  | <a href="#">354</a> | <a href="#">373</a> | <a href="#">32</a> |
|    |   |            |                                        |     |                                                                                      |  | <a href="#">52</a>  | <a href="#">64</a>  | <a href="#">72</a> |
|    |   |            |                                        |     |                                                                                      |  | <a href="#">8</a>   | <a href="#">40</a>  | <a href="#">21</a> |
|    |   |            |                                        |     |                                                                                      |  | <a href="#">354</a> | <a href="#">373</a> | <a href="#">32</a> |
|    |   |            |                                        |     |                                                                                      |  | <a href="#">355</a> | <a href="#">373</a> | <a href="#">32</a> |
|    |   |            |                                        |     |                                                                                      |  | <a href="#">328</a> | <a href="#">342</a> | <a href="#">27</a> |
|    |   |            | related, truncated                     |     |                                                                                      |  | <a href="#">141</a> | <a href="#">163</a> | <a href="#">40</a> |
|    |   |            |                                        |     |                                                                                      |  | <a href="#">356</a> | <a href="#">373</a> | <a href="#">32</a> |
|    |   |            |                                        |     |                                                                                      |  | <a href="#">379</a> | <a href="#">390</a> | <a href="#">30</a> |
|    |   |            |                                        |     |                                                                                      |  | <a href="#">356</a> | <a href="#">373</a> | <a href="#">32</a> |
|    |   |            |                                        |     |                                                                                      |  | <a href="#">328</a> | <a href="#">342</a> | <a href="#">27</a> |
|    |   |            |                                        |     |                                                                                      |  | <a href="#">181</a> | <a href="#">197</a> | <a href="#">46</a> |
|    |   |            |                                        |     |                                                                                      |  | <a href="#">328</a> | <a href="#">343</a> | <a href="#">27</a> |
|    |   |            |                                        |     |                                                                                      |  | <a href="#">177</a> | <a href="#">197</a> | <a href="#">46</a> |
|    |   |            |                                        |     |                                                                                      |  | <a href="#">52</a>  | <a href="#">65</a>  | <a href="#">72</a> |
|    |   |            |                                        |     |                                                                                      |  | <a href="#">72</a>  | <a href="#">106</a> | <a href="#">18</a> |
|    |   |            |                                        |     |                                                                                      |  | <a href="#">53</a>  | <a href="#">64</a>  | <a href="#">72</a> |
|    |   |            |                                        |     |                                                                                      |  | <a href="#">384</a> | <a href="#">398</a> | <a href="#">27</a> |
|    |   |            |                                        |     |                                                                                      |  | <a href="#">384</a> | <a href="#">398</a> | <a href="#">27</a> |
|    |   |            |                                        |     |                                                                                      |  | <a href="#">384</a> | <a href="#">398</a> | <a href="#">27</a> |
|    |   |            |                                        |     |                                                                                      |  | <a href="#">133</a> | <a href="#">155</a> | <a href="#">39</a> |
|    |   |            |                                        |     |                                                                                      |  | <a href="#">341</a> | <a href="#">381</a> | <a href="#">30</a> |
|    |   |            |                                        |     |                                                                                      |  | <a href="#">384</a> | <a href="#">399</a> | <a href="#">27</a> |
|    |   |            |                                        |     |                                                                                      |  | <a href="#">384</a> | <a href="#">398</a> | <a href="#">27</a> |
|    |   |            |                                        |     |                                                                                      |  | <a href="#">384</a> | <a href="#">399</a> | <a href="#">27</a> |
|    |   |            |                                        |     |                                                                                      |  | <a href="#">410</a> | <a href="#">429</a> | <a href="#">32</a> |
|    |   |            |                                        |     |                                                                                      |  | <a href="#">410</a> | <a href="#">431</a> | <a href="#">32</a> |
|    |   |            |                                        |     |                                                                                      |  | <a href="#">75</a>  | <a href="#">91</a>  | <a href="#">72</a> |
|    |   |            |                                        |     |                                                                                      |  | <a href="#">53</a>  | <a href="#">97</a>  | <a href="#">72</a> |
|    |   |            |                                        |     |                                                                                      |  | <a href="#">26</a>  | <a href="#">68</a>  | <a href="#">21</a> |
|    |   |            |                                        |     |                                                                                      |  | <a href="#">410</a> | <a href="#">429</a> | <a href="#">32</a> |
|    |   |            |                                        |     |                                                                                      |  | <a href="#">411</a> | <a href="#">429</a> | <a href="#">32</a> |
|    |   |            |                                        |     |                                                                                      |  | <a href="#">384</a> | <a href="#">398</a> | <a href="#">27</a> |
|    |   |            |                                        |     |                                                                                      |  | <a href="#">167</a> | <a href="#">187</a> | <a href="#">40</a> |
|    |   |            |                                        |     |                                                                                      |  | <a href="#">50</a>  | <a href="#">62</a>  | <a href="#">21</a> |
|    |   |            |                                        |     |                                                                                      |  | <a href="#">412</a> | <a href="#">429</a> | <a href="#">32</a> |
|    |   |            |                                        |     |                                                                                      |  | <a href="#">433</a> | <a href="#">452</a> | <a href="#">30</a> |
|    |   |            |                                        |     |                                                                                      |  | <a href="#">412</a> | <a href="#">429</a> | <a href="#">32</a> |
| 15 | E | PVX_120340 | variable surface protein Vir12-related | 452 |  |  |                     |                     |                    |



|    |   |            |                                              |     |  |                     |                     |                    |
|----|---|------------|----------------------------------------------|-----|--|---------------------|---------------------|--------------------|
|    |   |            |                                              |     |  | <a href="#">384</a> | <a href="#">398</a> | <a href="#">27</a> |
|    |   |            |                                              |     |  | <a href="#">197</a> | <a href="#">221</a> | <a href="#">46</a> |
|    |   |            |                                              |     |  | <a href="#">384</a> | <a href="#">399</a> | <a href="#">27</a> |
|    |   |            |                                              |     |  | <a href="#">74</a>  | <a href="#">91</a>  | <a href="#">72</a> |
|    |   |            |                                              |     |  | <a href="#">77</a>  | <a href="#">88</a>  | <a href="#">72</a> |
|    |   |            |                                              |     |  | <a href="#">384</a> | <a href="#">398</a> | <a href="#">27</a> |
|    |   |            |                                              |     |  | <a href="#">384</a> | <a href="#">398</a> | <a href="#">27</a> |
|    |   |            |                                              |     |  | <a href="#">384</a> | <a href="#">398</a> | <a href="#">27</a> |
|    |   |            |                                              |     |  | <a href="#">133</a> | <a href="#">155</a> | <a href="#">39</a> |
|    |   |            |                                              |     |  | <a href="#">341</a> | <a href="#">381</a> | <a href="#">30</a> |
|    |   |            |                                              |     |  | <a href="#">384</a> | <a href="#">393</a> | <a href="#">27</a> |
|    |   |            |                                              |     |  | <a href="#">384</a> | <a href="#">398</a> | <a href="#">27</a> |
|    |   |            |                                              |     |  | <a href="#">384</a> | <a href="#">393</a> | <a href="#">27</a> |
|    |   |            |                                              |     |  | <a href="#">410</a> | <a href="#">429</a> | <a href="#">32</a> |
|    |   |            |                                              |     |  | <a href="#">410</a> | <a href="#">431</a> | <a href="#">32</a> |
|    |   |            |                                              |     |  | <a href="#">75</a>  | <a href="#">90</a>  | <a href="#">72</a> |
|    |   |            |                                              |     |  | <a href="#">52</a>  | <a href="#">100</a> | <a href="#">72</a> |
|    |   |            |                                              |     |  | <a href="#">25</a>  | <a href="#">67</a>  | <a href="#">21</a> |
|    |   |            |                                              |     |  | <a href="#">410</a> | <a href="#">429</a> | <a href="#">32</a> |
|    |   |            |                                              |     |  | <a href="#">411</a> | <a href="#">429</a> | <a href="#">32</a> |
|    |   |            |                                              |     |  | <a href="#">384</a> | <a href="#">398</a> | <a href="#">27</a> |
|    |   |            |                                              |     |  | <a href="#">167</a> | <a href="#">187</a> | <a href="#">40</a> |
|    |   |            |                                              |     |  | <a href="#">49</a>  | <a href="#">61</a>  | <a href="#">21</a> |
|    |   |            |                                              |     |  | <a href="#">412</a> | <a href="#">429</a> | <a href="#">32</a> |
|    |   |            |                                              |     |  | <a href="#">433</a> | <a href="#">445</a> | <a href="#">30</a> |
|    |   |            |                                              |     |  | <a href="#">412</a> | <a href="#">429</a> | <a href="#">32</a> |
|    |   |            |                                              |     |  | <a href="#">384</a> | <a href="#">398</a> | <a href="#">27</a> |
|    |   |            |                                              |     |  | <a href="#">197</a> | <a href="#">221</a> | <a href="#">46</a> |
|    |   |            |                                              |     |  | <a href="#">384</a> | <a href="#">393</a> | <a href="#">27</a> |
|    |   |            |                                              |     |  | <a href="#">74</a>  | <a href="#">89</a>  | <a href="#">72</a> |
|    |   |            |                                              |     |  | <a href="#">75</a>  | <a href="#">90</a>  | <a href="#">72</a> |
|    |   |            |                                              |     |  | <a href="#">101</a> | <a href="#">128</a> | <a href="#">18</a> |
|    |   |            |                                              |     |  | <a href="#">76</a>  | <a href="#">87</a>  | <a href="#">72</a> |
|    |   |            |                                              |     |  | <a href="#">368</a> | <a href="#">382</a> | <a href="#">27</a> |
|    |   |            |                                              |     |  | <a href="#">368</a> | <a href="#">382</a> | <a href="#">27</a> |
|    |   |            |                                              |     |  | <a href="#">368</a> | <a href="#">382</a> | <a href="#">27</a> |
|    |   |            |                                              |     |  | <a href="#">6</a>   | <a href="#">28</a>  | <a href="#">7</a>  |
|    |   |            |                                              |     |  | <a href="#">316</a> | <a href="#">365</a> | <a href="#">30</a> |
|    |   |            |                                              |     |  | <a href="#">368</a> | <a href="#">383</a> | <a href="#">27</a> |
|    |   |            |                                              |     |  | <a href="#">368</a> | <a href="#">382</a> | <a href="#">27</a> |
|    |   |            |                                              |     |  | <a href="#">368</a> | <a href="#">383</a> | <a href="#">27</a> |
|    |   |            |                                              |     |  | <a href="#">394</a> | <a href="#">413</a> | <a href="#">32</a> |
|    |   |            |                                              |     |  | <a href="#">394</a> | <a href="#">413</a> | <a href="#">32</a> |
|    |   |            |                                              |     |  | <a href="#">59</a>  | <a href="#">122</a> | <a href="#">72</a> |
|    |   |            |                                              |     |  | <a href="#">43</a>  | <a href="#">74</a>  | <a href="#">21</a> |
| 16 | E | PVX_076195 | variable surface protein Vir12-related       | 459 |  |                     |                     |                    |
| 17 | E | PVX_075695 | variable surface protein Vir12/22/24-related | 436 |  |                     |                     |                    |

|    |   |            |                                          |     |                                                                                      |                     |                     |                    |
|----|---|------------|------------------------------------------|-----|--------------------------------------------------------------------------------------|---------------------|---------------------|--------------------|
|    |   |            |                                          |     |    | <a href="#">394</a> | <a href="#">413</a> | <a href="#">32</a> |
|    |   |            |                                          |     |                                                                                      | <a href="#">395</a> | <a href="#">413</a> | <a href="#">32</a> |
|    |   |            |                                          |     |                                                                                      | <a href="#">368</a> | <a href="#">382</a> | <a href="#">27</a> |
|    |   |            |                                          |     |                                                                                      | <a href="#">177</a> | <a href="#">196</a> | <a href="#">40</a> |
|    |   |            |                                          |     |                                                                                      | <a href="#">56</a>  | <a href="#">68</a>  | <a href="#">21</a> |
|    |   |            |                                          |     |                                                                                      | <a href="#">396</a> | <a href="#">413</a> | <a href="#">32</a> |
|    |   |            |                                          |     |                                                                                      | <a href="#">419</a> | <a href="#">433</a> | <a href="#">30</a> |
|    |   |            |                                          |     |                                                                                      | <a href="#">396</a> | <a href="#">413</a> | <a href="#">32</a> |
|    |   |            |                                          |     |                                                                                      | <a href="#">368</a> | <a href="#">382</a> | <a href="#">27</a> |
|    |   |            |                                          |     |                                                                                      | <a href="#">368</a> | <a href="#">383</a> | <a href="#">27</a> |
|    |   |            |                                          |     |                                                                                      | <a href="#">82</a>  | <a href="#">97</a>  | <a href="#">72</a> |
|    |   |            |                                          |     |                                                                                      | <a href="#">83</a>  | <a href="#">98</a>  | <a href="#">72</a> |
|    |   |            |                                          |     |                                                                                      | <a href="#">104</a> | <a href="#">133</a> | <a href="#">18</a> |
|    |   |            |                                          |     |                                                                                      | <a href="#">84</a>  | <a href="#">95</a>  | <a href="#">72</a> |
|    |   |            |                                          |     |                                                                                      | <a href="#">389</a> | <a href="#">403</a> | <a href="#">27</a> |
|    |   |            |                                          |     |                                                                                      | <a href="#">389</a> | <a href="#">403</a> | <a href="#">27</a> |
|    |   |            |                                          |     |                                                                                      | <a href="#">389</a> | <a href="#">403</a> | <a href="#">27</a> |
|    |   |            |                                          |     |                                                                                      | <a href="#">141</a> | <a href="#">163</a> | <a href="#">39</a> |
|    |   |            |                                          |     |                                                                                      | <a href="#">6</a>   | <a href="#">28</a>  | <a href="#">7</a>  |
|    |   |            |                                          |     |                                                                                      | <a href="#">335</a> | <a href="#">386</a> | <a href="#">30</a> |
|    |   |            |                                          |     |                                                                                      | <a href="#">389</a> | <a href="#">404</a> | <a href="#">27</a> |
|    |   |            |                                          |     |                                                                                      | <a href="#">389</a> | <a href="#">403</a> | <a href="#">27</a> |
|    |   |            |                                          |     |                                                                                      | <a href="#">389</a> | <a href="#">404</a> | <a href="#">27</a> |
|    |   |            |                                          |     |                                                                                      | <a href="#">415</a> | <a href="#">434</a> | <a href="#">32</a> |
|    |   |            |                                          |     |                                                                                      | <a href="#">415</a> | <a href="#">434</a> | <a href="#">32</a> |
|    |   |            |                                          |     |                                                                                      | <a href="#">59</a>  | <a href="#">121</a> | <a href="#">72</a> |
|    |   |            |                                          |     |                                                                                      | <a href="#">30</a>  | <a href="#">73</a>  | <a href="#">21</a> |
|    |   |            |                                          |     |  | <a href="#">415</a> | <a href="#">434</a> | <a href="#">32</a> |
|    |   |            |                                          |     |                                                                                      | <a href="#">416</a> | <a href="#">434</a> | <a href="#">32</a> |
|    |   |            |                                          |     |                                                                                      | <a href="#">389</a> | <a href="#">403</a> | <a href="#">27</a> |
|    |   |            |                                          |     |                                                                                      | <a href="#">54</a>  | <a href="#">68</a>  | <a href="#">21</a> |
|    |   |            |                                          |     |                                                                                      | <a href="#">417</a> | <a href="#">434</a> | <a href="#">32</a> |
|    |   |            |                                          |     |                                                                                      | <a href="#">438</a> | <a href="#">451</a> | <a href="#">30</a> |
|    |   |            |                                          |     |                                                                                      | <a href="#">417</a> | <a href="#">434</a> | <a href="#">32</a> |
|    |   |            |                                          |     |                                                                                      | <a href="#">389</a> | <a href="#">403</a> | <a href="#">27</a> |
|    |   |            |                                          |     |                                                                                      | <a href="#">205</a> | <a href="#">227</a> | <a href="#">46</a> |
|    |   |            |                                          |     |                                                                                      | <a href="#">389</a> | <a href="#">404</a> | <a href="#">27</a> |
|    |   |            |                                          |     |                                                                                      | <a href="#">205</a> | <a href="#">230</a> | <a href="#">46</a> |
|    |   |            |                                          |     |                                                                                      | <a href="#">104</a> | <a href="#">136</a> | <a href="#">18</a> |
|    |   |            |                                          |     |                                                                                      | <a href="#">84</a>  | <a href="#">95</a>  | <a href="#">72</a> |
|    |   |            |                                          |     |                                                                                      | <a href="#">177</a> | <a href="#">196</a> | <a href="#">40</a> |
| 18 | L | PVX_083590 | variable surface protein Vir12, putative | 452 |  | <a href="#">22</a>  | <a href="#">36</a>  | <a href="#">40</a> |
|    |   |            |                                          |     |                                                                                      | <a href="#">255</a> | <a href="#">269</a> | <a href="#">27</a> |
|    |   |            |                                          |     |                                                                                      | <a href="#">255</a> | <a href="#">269</a> | <a href="#">27</a> |
|    |   |            |                                          |     |                                                                                      | <a href="#">255</a> | <a href="#">269</a> | <a href="#">27</a> |
| 19 |   | PVX_074190 | hypothetical protein                     | 323 |  |                     |                     |                    |

|    |  |  |  |  |  |                     |                     |                    |
|----|--|--|--|--|--|---------------------|---------------------|--------------------|
|    |  |  |  |  |  | <a href="#">201</a> | <a href="#">252</a> | <a href="#">30</a> |
|    |  |  |  |  |  | <a href="#">255</a> | <a href="#">270</a> | <a href="#">27</a> |
|    |  |  |  |  |  | <a href="#">255</a> | <a href="#">269</a> | <a href="#">27</a> |
|    |  |  |  |  |  | <a href="#">255</a> | <a href="#">270</a> | <a href="#">27</a> |
|    |  |  |  |  |  | <a href="#">16</a>  | <a href="#">33</a>  | <a href="#">40</a> |
|    |  |  |  |  |  | <a href="#">281</a> | <a href="#">300</a> | <a href="#">32</a> |
|    |  |  |  |  |  | <a href="#">281</a> | <a href="#">302</a> | <a href="#">32</a> |
|    |  |  |  |  |  | <a href="#">49</a>  | <a href="#">64</a>  | <a href="#">46</a> |
|    |  |  |  |  |  | <a href="#">48</a>  | <a href="#">64</a>  | <a href="#">46</a> |
|    |  |  |  |  |  | <a href="#">281</a> | <a href="#">300</a> | <a href="#">32</a> |
|    |  |  |  |  |  | <a href="#">282</a> | <a href="#">300</a> | <a href="#">32</a> |
|    |  |  |  |  |  | <a href="#">255</a> | <a href="#">269</a> | <a href="#">27</a> |
|    |  |  |  |  |  | <a href="#">16</a>  | <a href="#">38</a>  | <a href="#">40</a> |
|    |  |  |  |  |  | <a href="#">283</a> | <a href="#">300</a> | <a href="#">32</a> |
|    |  |  |  |  |  | <a href="#">304</a> | <a href="#">323</a> | <a href="#">30</a> |
|    |  |  |  |  |  | <a href="#">283</a> | <a href="#">300</a> | <a href="#">32</a> |
|    |  |  |  |  |  | <a href="#">255</a> | <a href="#">269</a> | <a href="#">27</a> |
|    |  |  |  |  |  | <a href="#">255</a> | <a href="#">270</a> | <a href="#">27</a> |
|    |  |  |  |  |  | <a href="#">71</a>  | <a href="#">138</a> | <a href="#">9</a>  |
|    |  |  |  |  |  | <a href="#">49</a>  | <a href="#">69</a>  | <a href="#">46</a> |
|    |  |  |  |  |  | <a href="#">19</a>  | <a href="#">38</a>  | <a href="#">40</a> |
| 20 |  |  |  |  |  | <a href="#">265</a> | <a href="#">279</a> | <a href="#">27</a> |
|    |  |  |  |  |  | <a href="#">265</a> | <a href="#">279</a> | <a href="#">27</a> |
|    |  |  |  |  |  | <a href="#">265</a> | <a href="#">279</a> | <a href="#">27</a> |
|    |  |  |  |  |  | <a href="#">1</a>   | <a href="#">13</a>  | <a href="#">39</a> |
|    |  |  |  |  |  | <a href="#">261</a> | <a href="#">275</a> | <a href="#">74</a> |
|    |  |  |  |  |  | <a href="#">222</a> | <a href="#">262</a> | <a href="#">30</a> |
|    |  |  |  |  |  | <a href="#">265</a> | <a href="#">280</a> | <a href="#">27</a> |
|    |  |  |  |  |  | <a href="#">265</a> | <a href="#">279</a> | <a href="#">27</a> |
|    |  |  |  |  |  | <a href="#">265</a> | <a href="#">280</a> | <a href="#">27</a> |
|    |  |  |  |  |  | <a href="#">21</a>  | <a href="#">40</a>  | <a href="#">40</a> |
|    |  |  |  |  |  | <a href="#">291</a> | <a href="#">310</a> | <a href="#">32</a> |
|    |  |  |  |  |  | <a href="#">291</a> | <a href="#">312</a> | <a href="#">32</a> |
|    |  |  |  |  |  | <a href="#">59</a>  | <a href="#">74</a>  | <a href="#">46</a> |
|    |  |  |  |  |  | <a href="#">58</a>  | <a href="#">75</a>  | <a href="#">46</a> |
|    |  |  |  |  |  | <a href="#">291</a> | <a href="#">310</a> | <a href="#">32</a> |
|    |  |  |  |  |  | <a href="#">292</a> | <a href="#">310</a> | <a href="#">32</a> |
|    |  |  |  |  |  | <a href="#">265</a> | <a href="#">279</a> | <a href="#">27</a> |
|    |  |  |  |  |  | <a href="#">26</a>  | <a href="#">46</a>  | <a href="#">40</a> |
|    |  |  |  |  |  | <a href="#">293</a> | <a href="#">310</a> | <a href="#">32</a> |
|    |  |  |  |  |  | <a href="#">314</a> | <a href="#">330</a> | <a href="#">30</a> |
|    |  |  |  |  |  | <a href="#">293</a> | <a href="#">310</a> | <a href="#">32</a> |
|    |  |  |  |  |  | <a href="#">265</a> | <a href="#">279</a> | <a href="#">27</a> |
|    |  |  |  |  |  | <a href="#">265</a> | <a href="#">280</a> | <a href="#">27</a> |
|    |  |  |  |  |  | <a href="#">85</a>  | <a href="#">151</a> | <a href="#">9</a>  |

PVX\_020170 hypothetical protein

333

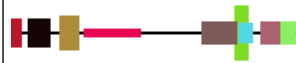

|                     |                     |                    |                                        |     |                                                                                      |                     |                     |                    |
|---------------------|---------------------|--------------------|----------------------------------------|-----|--------------------------------------------------------------------------------------|---------------------|---------------------|--------------------|
| 21                  | Not clustered       | PVX_183280         | variable surface protein Vir12-related | 443 | 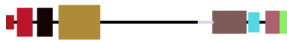   | 59                  | 79                  | 46                 |
|                     |                     |                    |                                        |     |                                                                                      | <a href="#">375</a> | <a href="#">389</a> | <a href="#">27</a> |
|                     |                     |                    |                                        |     |                                                                                      | <a href="#">376</a> | <a href="#">387</a> | <a href="#">27</a> |
|                     |                     |                    |                                        |     |                                                                                      | <a href="#">376</a> | <a href="#">387</a> | <a href="#">27</a> |
|                     |                     |                    |                                        |     |                                                                                      | <a href="#">18</a>  | <a href="#">40</a>  | <a href="#">39</a> |
|                     |                     |                    |                                        |     |                                                                                      | <a href="#">321</a> | <a href="#">372</a> | <a href="#">30</a> |
|                     |                     |                    |                                        |     |                                                                                      | <a href="#">375</a> | <a href="#">390</a> | <a href="#">27</a> |
|                     |                     |                    |                                        |     |                                                                                      | <a href="#">375</a> | <a href="#">389</a> | <a href="#">27</a> |
|                     |                     |                    |                                        |     |                                                                                      | <a href="#">375</a> | <a href="#">390</a> | <a href="#">27</a> |
|                     |                     |                    |                                        |     |                                                                                      | <a href="#">298</a> | <a href="#">320</a> | <a href="#">4</a>  |
|                     |                     |                    |                                        |     |                                                                                      | <a href="#">49</a>  | <a href="#">68</a>  | <a href="#">40</a> |
|                     |                     |                    |                                        |     |                                                                                      | <a href="#">402</a> | <a href="#">419</a> | <a href="#">32</a> |
|                     |                     |                    |                                        |     |                                                                                      | <a href="#">402</a> | <a href="#">422</a> | <a href="#">32</a> |
|                     |                     |                    |                                        |     |                                                                                      | <a href="#">1</a>   | <a href="#">13</a>  | <a href="#">18</a> |
|                     |                     |                    |                                        |     |                                                                                      | <a href="#">402</a> | <a href="#">419</a> | <a href="#">32</a> |
|                     |                     |                    |                                        |     |                                                                                      | <a href="#">402</a> | <a href="#">419</a> | <a href="#">32</a> |
|                     |                     |                    |                                        |     |                                                                                      | <a href="#">376</a> | <a href="#">387</a> | <a href="#">27</a> |
|                     |                     |                    |                                        |     |                                                                                      | <a href="#">49</a>  | <a href="#">73</a>  | <a href="#">40</a> |
|                     |                     |                    |                                        |     |                                                                                      | <a href="#">403</a> | <a href="#">419</a> | <a href="#">32</a> |
|                     |                     |                    |                                        |     |                                                                                      | <a href="#">424</a> | <a href="#">443</a> | <a href="#">30</a> |
|                     |                     |                    |                                        |     |                                                                                      | <a href="#">403</a> | <a href="#">419</a> | <a href="#">32</a> |
| <a href="#">375</a> | <a href="#">389</a> | <a href="#">27</a> |                                        |     |                                                                                      |                     |                     |                    |
| <a href="#">375</a> | <a href="#">390</a> | <a href="#">27</a> |                                        |     |                                                                                      |                     |                     |                    |
| <a href="#">84</a>  | <a href="#">144</a> | <a href="#">46</a> |                                        |     |                                                                                      |                     |                     |                    |
| 22                  |                     | PVX_004495         | hypothetical protein, conserved        | 449 |  | <a href="#">381</a> | <a href="#">395</a> | <a href="#">27</a> |
|                     |                     |                    |                                        |     |                                                                                      | <a href="#">382</a> | <a href="#">393</a> | <a href="#">27</a> |
|                     |                     |                    |                                        |     |                                                                                      | <a href="#">382</a> | <a href="#">393</a> | <a href="#">27</a> |
|                     |                     |                    |                                        |     |                                                                                      | <a href="#">16</a>  | <a href="#">38</a>  | <a href="#">39</a> |
|                     |                     |                    |                                        |     |                                                                                      | <a href="#">327</a> | <a href="#">378</a> | <a href="#">30</a> |
|                     |                     |                    |                                        |     |                                                                                      | <a href="#">381</a> | <a href="#">396</a> | <a href="#">27</a> |
|                     |                     |                    |                                        |     |                                                                                      | <a href="#">381</a> | <a href="#">395</a> | <a href="#">27</a> |
|                     |                     |                    |                                        |     |                                                                                      | <a href="#">381</a> | <a href="#">396</a> | <a href="#">27</a> |
|                     |                     |                    |                                        |     |                                                                                      | <a href="#">47</a>  | <a href="#">66</a>  | <a href="#">40</a> |
|                     |                     |                    |                                        |     |                                                                                      | <a href="#">408</a> | <a href="#">426</a> | <a href="#">32</a> |
|                     |                     |                    |                                        |     |                                                                                      | <a href="#">408</a> | <a href="#">428</a> | <a href="#">32</a> |
|                     |                     |                    |                                        |     |                                                                                      | <a href="#">408</a> | <a href="#">426</a> | <a href="#">32</a> |
|                     |                     |                    |                                        |     |                                                                                      | <a href="#">408</a> | <a href="#">426</a> | <a href="#">32</a> |
|                     |                     |                    |                                        |     |                                                                                      | <a href="#">382</a> | <a href="#">393</a> | <a href="#">27</a> |
|                     |                     |                    |                                        |     |                                                                                      | <a href="#">47</a>  | <a href="#">71</a>  | <a href="#">40</a> |
|                     |                     |                    |                                        |     |                                                                                      | <a href="#">409</a> | <a href="#">426</a> | <a href="#">32</a> |
|                     |                     |                    |                                        |     |                                                                                      | <a href="#">430</a> | <a href="#">449</a> | <a href="#">30</a> |
|                     |                     |                    |                                        |     |                                                                                      | <a href="#">409</a> | <a href="#">426</a> | <a href="#">32</a> |
|                     |                     |                    |                                        |     |                                                                                      | <a href="#">381</a> | <a href="#">395</a> | <a href="#">27</a> |
|                     |                     |                    |                                        |     |                                                                                      | <a href="#">381</a> | <a href="#">396</a> | <a href="#">27</a> |
|                     |                     |                    |                                        |     |                                                                                      | <a href="#">78</a>  | <a href="#">140</a> | <a href="#">46</a> |

|                     |                     |                    |                                        |     |                                                                                      |                     |                     |                    |
|---------------------|---------------------|--------------------|----------------------------------------|-----|--------------------------------------------------------------------------------------|---------------------|---------------------|--------------------|
| 23                  | Not clustered       | PVX_120845         | variable surface protein Vir12-related | 587 |    | <a href="#">519</a> | <a href="#">533</a> | <a href="#">27</a> |
|                     |                     |                    |                                        |     |                                                                                      | <a href="#">520</a> | <a href="#">531</a> | <a href="#">27</a> |
|                     |                     |                    |                                        |     |                                                                                      | <a href="#">520</a> | <a href="#">531</a> | <a href="#">27</a> |
|                     |                     |                    |                                        |     |                                                                                      | <a href="#">88</a>  | <a href="#">97</a>  | <a href="#">72</a> |
|                     |                     |                    |                                        |     |                                                                                      | <a href="#">139</a> | <a href="#">161</a> | <a href="#">39</a> |
|                     |                     |                    |                                        |     |                                                                                      | <a href="#">465</a> | <a href="#">516</a> | <a href="#">30</a> |
|                     |                     |                    |                                        |     |                                                                                      | <a href="#">519</a> | <a href="#">534</a> | <a href="#">27</a> |
|                     |                     |                    |                                        |     |                                                                                      | <a href="#">56</a>  | <a href="#">102</a> | <a href="#">11</a> |
|                     |                     |                    |                                        |     |                                                                                      | <a href="#">519</a> | <a href="#">533</a> | <a href="#">27</a> |
|                     |                     |                    |                                        |     |                                                                                      | <a href="#">519</a> | <a href="#">534</a> | <a href="#">27</a> |
|                     |                     |                    |                                        |     |                                                                                      | <a href="#">443</a> | <a href="#">462</a> | <a href="#">4</a>  |
|                     |                     |                    |                                        |     |                                                                                      | <a href="#">57</a>  | <a href="#">67</a>  | <a href="#">28</a> |
|                     |                     |                    |                                        |     |                                                                                      | <a href="#">163</a> | <a href="#">188</a> | <a href="#">40</a> |
|                     |                     |                    |                                        |     |                                                                                      | <a href="#">546</a> | <a href="#">563</a> | <a href="#">32</a> |
|                     |                     |                    |                                        |     |                                                                                      | <a href="#">546</a> | <a href="#">566</a> | <a href="#">32</a> |
|                     |                     |                    |                                        |     |                                                                                      | <a href="#">98</a>  | <a href="#">133</a> | <a href="#">18</a> |
|                     |                     |                    |                                        |     |                                                                                      | <a href="#">97</a>  | <a href="#">133</a> | <a href="#">18</a> |
|                     |                     |                    |                                        |     |                                                                                      | <a href="#">61</a>  | <a href="#">96</a>  | <a href="#">72</a> |
|                     |                     |                    |                                        |     |                                                                                      | <a href="#">52</a>  | <a href="#">72</a>  | <a href="#">21</a> |
|                     |                     |                    |                                        |     |                                                                                      | <a href="#">546</a> | <a href="#">563</a> | <a href="#">32</a> |
|                     |                     |                    |                                        |     |                                                                                      | <a href="#">546</a> | <a href="#">563</a> | <a href="#">32</a> |
|                     |                     |                    |                                        |     |                                                                                      | <a href="#">520</a> | <a href="#">531</a> | <a href="#">27</a> |
|                     |                     |                    |                                        |     |                                                                                      | <a href="#">171</a> | <a href="#">193</a> | <a href="#">40</a> |
| <a href="#">57</a>  | <a href="#">70</a>  | <a href="#">21</a> |                                        |     |                                                                                      |                     |                     |                    |
| <a href="#">547</a> | <a href="#">563</a> | <a href="#">32</a> |                                        |     |                                                                                      |                     |                     |                    |
| <a href="#">568</a> | <a href="#">587</a> | <a href="#">30</a> |                                        |     |                                                                                      |                     |                     |                    |
| <a href="#">547</a> | <a href="#">563</a> | <a href="#">32</a> |                                        |     |                                                                                      |                     |                     |                    |
| <a href="#">519</a> | <a href="#">533</a> | <a href="#">27</a> |                                        |     |                                                                                      |                     |                     |                    |
| <a href="#">519</a> | <a href="#">534</a> | <a href="#">27</a> |                                        |     |                                                                                      |                     |                     |                    |
| <a href="#">203</a> | <a href="#">265</a> | <a href="#">46</a> |                                        |     |                                                                                      |                     |                     |                    |
| <a href="#">83</a>  | <a href="#">96</a>  | <a href="#">72</a> |                                        |     |                                                                                      |                     |                     |                    |
| 24                  | E                   | PVX_101620         | variable surface protein Vir16-related | 594 |  | <a href="#">526</a> | <a href="#">540</a> | <a href="#">27</a> |
|                     |                     |                    |                                        |     |                                                                                      | <a href="#">527</a> | <a href="#">538</a> | <a href="#">27</a> |
|                     |                     |                    |                                        |     |                                                                                      | <a href="#">527</a> | <a href="#">538</a> | <a href="#">27</a> |
|                     |                     |                    |                                        |     |                                                                                      | <a href="#">133</a> | <a href="#">155</a> | <a href="#">39</a> |
|                     |                     |                    |                                        |     |                                                                                      | <a href="#">472</a> | <a href="#">523</a> | <a href="#">30</a> |
|                     |                     |                    |                                        |     |                                                                                      | <a href="#">526</a> | <a href="#">541</a> | <a href="#">27</a> |
|                     |                     |                    |                                        |     |                                                                                      | <a href="#">48</a>  | <a href="#">95</a>  | <a href="#">11</a> |
|                     |                     |                    |                                        |     |                                                                                      | <a href="#">526</a> | <a href="#">540</a> | <a href="#">27</a> |
|                     |                     |                    |                                        |     |                                                                                      | <a href="#">526</a> | <a href="#">541</a> | <a href="#">27</a> |
|                     |                     |                    |                                        |     |                                                                                      | <a href="#">450</a> | <a href="#">469</a> | <a href="#">4</a>  |
|                     |                     |                    |                                        |     |                                                                                      | <a href="#">157</a> | <a href="#">182</a> | <a href="#">40</a> |
|                     |                     |                    |                                        |     |                                                                                      | <a href="#">553</a> | <a href="#">570</a> | <a href="#">32</a> |
|                     |                     |                    |                                        |     |                                                                                      | <a href="#">553</a> | <a href="#">573</a> | <a href="#">32</a> |
|                     |                     |                    |                                        |     |                                                                                      | <a href="#">90</a>  | <a href="#">127</a> | <a href="#">18</a> |

|    |               |            |                                        |     |  |  |                     |                     |                    |
|----|---------------|------------|----------------------------------------|-----|--|--|---------------------|---------------------|--------------------|
|    |               |            |                                        |     |  |  | <a href="#">54</a>  | <a href="#">89</a>  | <a href="#">72</a> |
|    |               |            |                                        |     |  |  | <a href="#">46</a>  | <a href="#">65</a>  | <a href="#">21</a> |
|    |               |            |                                        |     |  |  | <a href="#">553</a> | <a href="#">570</a> | <a href="#">32</a> |
|    |               |            |                                        |     |  |  | <a href="#">553</a> | <a href="#">570</a> | <a href="#">32</a> |
|    |               |            |                                        |     |  |  | <a href="#">527</a> | <a href="#">538</a> | <a href="#">27</a> |
|    |               |            |                                        |     |  |  | <a href="#">165</a> | <a href="#">187</a> | <a href="#">40</a> |
|    |               |            |                                        |     |  |  | <a href="#">49</a>  | <a href="#">63</a>  | <a href="#">21</a> |
|    |               |            |                                        |     |  |  | <a href="#">554</a> | <a href="#">570</a> | <a href="#">32</a> |
|    |               |            |                                        |     |  |  | <a href="#">575</a> | <a href="#">594</a> | <a href="#">30</a> |
|    |               |            |                                        |     |  |  | <a href="#">554</a> | <a href="#">570</a> | <a href="#">32</a> |
|    |               |            |                                        |     |  |  | <a href="#">526</a> | <a href="#">540</a> | <a href="#">27</a> |
|    |               |            |                                        |     |  |  | <a href="#">526</a> | <a href="#">541</a> | <a href="#">27</a> |
|    |               |            |                                        |     |  |  | <a href="#">197</a> | <a href="#">259</a> | <a href="#">46</a> |
|    |               |            |                                        |     |  |  | <a href="#">74</a>  | <a href="#">89</a>  | <a href="#">72</a> |
|    |               |            |                                        |     |  |  | <a href="#">506</a> | <a href="#">520</a> | <a href="#">27</a> |
|    |               |            |                                        |     |  |  | <a href="#">507</a> | <a href="#">518</a> | <a href="#">27</a> |
|    |               |            |                                        |     |  |  | <a href="#">507</a> | <a href="#">518</a> | <a href="#">27</a> |
|    |               |            |                                        |     |  |  | <a href="#">139</a> | <a href="#">161</a> | <a href="#">39</a> |
|    |               |            |                                        |     |  |  | <a href="#">452</a> | <a href="#">503</a> | <a href="#">30</a> |
|    |               |            |                                        |     |  |  | <a href="#">506</a> | <a href="#">521</a> | <a href="#">27</a> |
|    |               |            |                                        |     |  |  | <a href="#">53</a>  | <a href="#">105</a> | <a href="#">11</a> |
|    |               |            |                                        |     |  |  | <a href="#">506</a> | <a href="#">520</a> | <a href="#">27</a> |
|    |               |            |                                        |     |  |  | <a href="#">506</a> | <a href="#">521</a> | <a href="#">27</a> |
|    |               |            |                                        |     |  |  | <a href="#">429</a> | <a href="#">451</a> | <a href="#">4</a>  |
|    |               |            |                                        |     |  |  | <a href="#">172</a> | <a href="#">187</a> | <a href="#">40</a> |
|    |               |            |                                        |     |  |  | <a href="#">533</a> | <a href="#">551</a> | <a href="#">32</a> |
|    |               |            |                                        |     |  |  | <a href="#">533</a> | <a href="#">553</a> | <a href="#">32</a> |
|    |               |            |                                        |     |  |  | <a href="#">97</a>  | <a href="#">134</a> | <a href="#">18</a> |
|    |               |            |                                        |     |  |  | <a href="#">30</a>  | <a href="#">72</a>  | <a href="#">21</a> |
|    |               |            |                                        |     |  |  | <a href="#">533</a> | <a href="#">551</a> | <a href="#">32</a> |
|    |               |            |                                        |     |  |  | <a href="#">533</a> | <a href="#">551</a> | <a href="#">32</a> |
|    |               |            |                                        |     |  |  | <a href="#">507</a> | <a href="#">518</a> | <a href="#">27</a> |
|    |               |            |                                        |     |  |  | <a href="#">172</a> | <a href="#">194</a> | <a href="#">40</a> |
|    |               |            |                                        |     |  |  | <a href="#">56</a>  | <a href="#">69</a>  | <a href="#">21</a> |
|    |               |            |                                        |     |  |  | <a href="#">534</a> | <a href="#">551</a> | <a href="#">32</a> |
|    |               |            |                                        |     |  |  | <a href="#">555</a> | <a href="#">574</a> | <a href="#">30</a> |
|    |               |            |                                        |     |  |  | <a href="#">534</a> | <a href="#">551</a> | <a href="#">32</a> |
|    |               |            |                                        |     |  |  | <a href="#">506</a> | <a href="#">520</a> | <a href="#">27</a> |
|    |               |            |                                        |     |  |  | <a href="#">506</a> | <a href="#">521</a> | <a href="#">27</a> |
|    |               |            |                                        |     |  |  | <a href="#">203</a> | <a href="#">265</a> | <a href="#">46</a> |
|    |               |            |                                        |     |  |  | <a href="#">81</a>  | <a href="#">95</a>  | <a href="#">72</a> |
|    |               |            |                                        |     |  |  | <a href="#">84</a>  | <a href="#">95</a>  | <a href="#">72</a> |
|    |               |            |                                        |     |  |  | <a href="#">100</a> | <a href="#">116</a> | <a href="#">40</a> |
| 25 | Not clustered | PVX_115985 | variable surface protein Vir, putative | 574 |  |  | <a href="#">326</a> | <a href="#">340</a> | <a href="#">27</a> |
| 26 |               | PVX_065690 | hypothetical protein                   | 394 |  |  | <a href="#">326</a> | <a href="#">340</a> | <a href="#">27</a> |

|    |  |            |                      |     |                                                                                      |  |                     |                     |                    |
|----|--|------------|----------------------|-----|--------------------------------------------------------------------------------------|--|---------------------|---------------------|--------------------|
|    |  |            |                      |     |                                                                                      |  | <a href="#">326</a> | <a href="#">340</a> | <a href="#">27</a> |
|    |  |            |                      |     |                                                                                      |  | <a href="#">62</a>  | <a href="#">82</a>  | <a href="#">39</a> |
|    |  |            |                      |     |                                                                                      |  | <a href="#">272</a> | <a href="#">323</a> | <a href="#">30</a> |
|    |  |            |                      |     |                                                                                      |  | <a href="#">326</a> | <a href="#">341</a> | <a href="#">27</a> |
|    |  |            |                      |     |                                                                                      |  | <a href="#">326</a> | <a href="#">340</a> | <a href="#">27</a> |
|    |  |            |                      |     |                                                                                      |  | <a href="#">326</a> | <a href="#">341</a> | <a href="#">27</a> |
|    |  |            |                      |     |                                                                                      |  | <a href="#">352</a> | <a href="#">371</a> | <a href="#">32</a> |
|    |  |            |                      |     |                                                                                      |  | <a href="#">352</a> | <a href="#">371</a> | <a href="#">32</a> |
|    |  |            |                      |     |                                                                                      |  | <a href="#">21</a>  | <a href="#">55</a>  | <a href="#">18</a> |
|    |  |            |                      |     |                                                                                      |  | <a href="#">352</a> | <a href="#">371</a> | <a href="#">32</a> |
|    |  |            |                      |     |                                                                                      |  | <a href="#">353</a> | <a href="#">371</a> | <a href="#">32</a> |
|    |  |            |                      |     |                                                                                      |  | <a href="#">326</a> | <a href="#">340</a> | <a href="#">27</a> |
|    |  |            |                      |     |                                                                                      |  | <a href="#">94</a>  | <a href="#">116</a> | <a href="#">40</a> |
|    |  |            |                      |     |                                                                                      |  | <a href="#">98</a>  | <a href="#">115</a> | <a href="#">40</a> |
|    |  |            |                      |     |                                                                                      |  | <a href="#">354</a> | <a href="#">371</a> | <a href="#">32</a> |
|    |  |            |                      |     |                                                                                      |  | <a href="#">375</a> | <a href="#">391</a> | <a href="#">30</a> |
|    |  |            |                      |     |                                                                                      |  | <a href="#">354</a> | <a href="#">371</a> | <a href="#">32</a> |
|    |  |            |                      |     |                                                                                      |  | <a href="#">326</a> | <a href="#">340</a> | <a href="#">27</a> |
|    |  |            |                      |     |                                                                                      |  | <a href="#">127</a> | <a href="#">153</a> | <a href="#">46</a> |
|    |  |            |                      |     |                                                                                      |  | <a href="#">326</a> | <a href="#">341</a> | <a href="#">27</a> |
|    |  |            |                      |     |                                                                                      |  | <a href="#">10</a>  | <a href="#">18</a>  | <a href="#">72</a> |
|    |  |            |                      |     |                                                                                      |  | <a href="#">121</a> | <a href="#">137</a> | <a href="#">40</a> |
|    |  |            |                      |     |                                                                                      |  | <a href="#">336</a> | <a href="#">350</a> | <a href="#">27</a> |
|    |  |            |                      |     |                                                                                      |  | <a href="#">336</a> | <a href="#">350</a> | <a href="#">27</a> |
|    |  |            |                      |     |                                                                                      |  | <a href="#">336</a> | <a href="#">350</a> | <a href="#">27</a> |
|    |  |            |                      |     |                                                                                      |  | <a href="#">88</a>  | <a href="#">102</a> | <a href="#">39</a> |
|    |  |            |                      |     |                                                                                      |  | <a href="#">282</a> | <a href="#">333</a> | <a href="#">30</a> |
|    |  |            |                      |     |                                                                                      |  | <a href="#">336</a> | <a href="#">351</a> | <a href="#">27</a> |
|    |  |            |                      |     |                                                                                      |  | <a href="#">336</a> | <a href="#">350</a> | <a href="#">27</a> |
|    |  |            |                      |     |                                                                                      |  | <a href="#">336</a> | <a href="#">351</a> | <a href="#">27</a> |
|    |  |            |                      |     |                                                                                      |  | <a href="#">362</a> | <a href="#">380</a> | <a href="#">32</a> |
|    |  |            |                      |     |                                                                                      |  | <a href="#">362</a> | <a href="#">382</a> | <a href="#">32</a> |
|    |  |            |                      |     |                                                                                      |  | <a href="#">5</a>   | <a href="#">45</a>  | <a href="#">21</a> |
|    |  |            |                      |     |                                                                                      |  | <a href="#">362</a> | <a href="#">380</a> | <a href="#">32</a> |
|    |  |            |                      |     |                                                                                      |  | <a href="#">363</a> | <a href="#">380</a> | <a href="#">32</a> |
|    |  |            |                      |     |                                                                                      |  | <a href="#">336</a> | <a href="#">350</a> | <a href="#">27</a> |
|    |  |            |                      |     |                                                                                      |  | <a href="#">113</a> | <a href="#">137</a> | <a href="#">40</a> |
|    |  |            |                      |     |                                                                                      |  | <a href="#">119</a> | <a href="#">136</a> | <a href="#">40</a> |
|    |  |            |                      |     |                                                                                      |  | <a href="#">364</a> | <a href="#">380</a> | <a href="#">32</a> |
|    |  |            |                      |     |                                                                                      |  | <a href="#">385</a> | <a href="#">400</a> | <a href="#">30</a> |
|    |  |            |                      |     |                                                                                      |  | <a href="#">364</a> | <a href="#">380</a> | <a href="#">32</a> |
|    |  |            |                      |     |                                                                                      |  | <a href="#">336</a> | <a href="#">350</a> | <a href="#">27</a> |
|    |  |            |                      |     |                                                                                      |  | <a href="#">148</a> | <a href="#">174</a> | <a href="#">46</a> |
|    |  |            |                      |     |                                                                                      |  | <a href="#">336</a> | <a href="#">351</a> | <a href="#">27</a> |
| 27 |  | PVX_034690 | hypothetical protein | 404 |  |  |                     |                     |                    |
| 28 |  | PVX_036690 | hypothetical         | 98  |  |  | <a href="#">30</a>  | <a href="#">44</a>  | <a href="#">27</a> |

|    |            |                      |     |                                                                                      |  |                     |                     |                    |
|----|------------|----------------------|-----|--------------------------------------------------------------------------------------|--|---------------------|---------------------|--------------------|
|    |            |                      |     |                                                                                      |  | <a href="#">31</a>  | <a href="#">42</a>  | <a href="#">27</a> |
|    |            |                      |     |                                                                                      |  | <a href="#">31</a>  | <a href="#">42</a>  | <a href="#">27</a> |
|    |            |                      |     |                                                                                      |  | <a href="#">8</a>   | <a href="#">27</a>  | <a href="#">30</a> |
|    |            |                      |     |                                                                                      |  | <a href="#">30</a>  | <a href="#">45</a>  | <a href="#">27</a> |
|    |            |                      |     |                                                                                      |  | <a href="#">30</a>  | <a href="#">44</a>  | <a href="#">27</a> |
|    |            |                      |     |                                                                                      |  | <a href="#">30</a>  | <a href="#">45</a>  | <a href="#">27</a> |
|    |            |                      |     |                                                                                      |  | <a href="#">57</a>  | <a href="#">74</a>  | <a href="#">32</a> |
|    |            |                      |     |                                                                                      |  | <a href="#">57</a>  | <a href="#">77</a>  | <a href="#">32</a> |
|    |            |                      |     |                                                                                      |  | <a href="#">57</a>  | <a href="#">74</a>  | <a href="#">32</a> |
|    |            |                      |     |                                                                                      |  | <a href="#">57</a>  | <a href="#">74</a>  | <a href="#">32</a> |
|    |            |                      |     |                                                                                      |  | <a href="#">31</a>  | <a href="#">42</a>  | <a href="#">27</a> |
|    |            |                      |     |                                                                                      |  | <a href="#">58</a>  | <a href="#">74</a>  | <a href="#">32</a> |
|    |            |                      |     |                                                                                      |  | <a href="#">79</a>  | <a href="#">98</a>  | <a href="#">30</a> |
|    |            |                      |     |                                                                                      |  | <a href="#">58</a>  | <a href="#">74</a>  | <a href="#">32</a> |
|    |            |                      |     |                                                                                      |  | <a href="#">30</a>  | <a href="#">44</a>  | <a href="#">27</a> |
|    |            |                      |     |                                                                                      |  | <a href="#">30</a>  | <a href="#">45</a>  | <a href="#">27</a> |
|    |            |                      |     |                                                                                      |  | <a href="#">205</a> | <a href="#">219</a> | <a href="#">27</a> |
|    |            |                      |     |                                                                                      |  | <a href="#">205</a> | <a href="#">219</a> | <a href="#">27</a> |
|    |            |                      |     |                                                                                      |  | <a href="#">205</a> | <a href="#">219</a> | <a href="#">27</a> |
|    |            |                      |     |                                                                                      |  | <a href="#">151</a> | <a href="#">202</a> | <a href="#">30</a> |
|    |            |                      |     |                                                                                      |  | <a href="#">205</a> | <a href="#">220</a> | <a href="#">27</a> |
|    |            |                      |     |                                                                                      |  | <a href="#">205</a> | <a href="#">219</a> | <a href="#">27</a> |
|    |            |                      |     |                                                                                      |  | <a href="#">205</a> | <a href="#">220</a> | <a href="#">27</a> |
|    |            |                      |     |                                                                                      |  | <a href="#">231</a> | <a href="#">249</a> | <a href="#">32</a> |
|    |            |                      |     |                                                                                      |  | <a href="#">231</a> | <a href="#">252</a> | <a href="#">32</a> |
|    |            |                      |     |                                                                                      |  | <a href="#">231</a> | <a href="#">249</a> | <a href="#">32</a> |
|    |            |                      |     |                                                                                      |  | <a href="#">232</a> | <a href="#">249</a> | <a href="#">32</a> |
|    |            |                      |     |                                                                                      |  | <a href="#">205</a> | <a href="#">219</a> | <a href="#">27</a> |
|    |            |                      |     |                                                                                      |  | <a href="#">233</a> | <a href="#">249</a> | <a href="#">32</a> |
|    |            |                      |     |                                                                                      |  | <a href="#">254</a> | <a href="#">270</a> | <a href="#">30</a> |
|    |            |                      |     |                                                                                      |  | <a href="#">233</a> | <a href="#">249</a> | <a href="#">32</a> |
|    |            |                      |     |                                                                                      |  | <a href="#">205</a> | <a href="#">219</a> | <a href="#">27</a> |
|    |            |                      |     |                                                                                      |  | <a href="#">34</a>  | <a href="#">47</a>  | <a href="#">46</a> |
|    |            |                      |     |                                                                                      |  | <a href="#">205</a> | <a href="#">220</a> | <a href="#">27</a> |
|    |            |                      |     |                                                                                      |  | <a href="#">131</a> | <a href="#">145</a> | <a href="#">27</a> |
|    |            |                      |     |                                                                                      |  | <a href="#">131</a> | <a href="#">145</a> | <a href="#">27</a> |
|    |            |                      |     |                                                                                      |  | <a href="#">131</a> | <a href="#">145</a> | <a href="#">27</a> |
|    |            |                      |     |                                                                                      |  | <a href="#">79</a>  | <a href="#">128</a> | <a href="#">30</a> |
|    |            |                      |     |                                                                                      |  | <a href="#">131</a> | <a href="#">146</a> | <a href="#">27</a> |
|    |            |                      |     |                                                                                      |  | <a href="#">131</a> | <a href="#">145</a> | <a href="#">27</a> |
|    |            |                      |     |                                                                                      |  | <a href="#">131</a> | <a href="#">146</a> | <a href="#">27</a> |
|    |            |                      |     |                                                                                      |  | <a href="#">158</a> | <a href="#">178</a> | <a href="#">32</a> |
|    |            |                      |     |                                                                                      |  | <a href="#">158</a> | <a href="#">177</a> | <a href="#">32</a> |
|    |            |                      |     |                                                                                      |  | <a href="#">158</a> | <a href="#">177</a> | <a href="#">32</a> |
|    |            |                      |     |                                                                                      |  | <a href="#">159</a> | <a href="#">177</a> | <a href="#">32</a> |
| 29 | PVX_061690 | hypothetical protein | 273 |  |  |                     |                     |                    |
| 30 | PVX_027190 | hypothetical protein | 200 |  |  |                     |                     |                    |



|                    |                    |                      |                                     |                                                                                    |                                                                                      |                     |                      |                    |                                                                                      |                   |                    |                    |
|--------------------|--------------------|----------------------|-------------------------------------|------------------------------------------------------------------------------------|--------------------------------------------------------------------------------------|---------------------|----------------------|--------------------|--------------------------------------------------------------------------------------|-------------------|--------------------|--------------------|
|                    |                    |                      |                                     |                                                                                    |                                                                                      | <a href="#">131</a> | <a href="#">145</a>  | <a href="#">27</a> |                                                                                      |                   |                    |                    |
|                    |                    |                      |                                     |                                                                                    |                                                                                      | <a href="#">160</a> | <a href="#">179</a>  | <a href="#">32</a> |                                                                                      |                   |                    |                    |
|                    |                    |                      |                                     |                                                                                    |                                                                                      | <a href="#">180</a> | <a href="#">200</a>  | <a href="#">30</a> |                                                                                      |                   |                    |                    |
|                    |                    |                      |                                     |                                                                                    |                                                                                      | <a href="#">160</a> | <a href="#">177</a>  | <a href="#">32</a> |                                                                                      |                   |                    |                    |
|                    |                    |                      |                                     |                                                                                    |                                                                                      | <a href="#">131</a> | <a href="#">145</a>  | <a href="#">27</a> |                                                                                      |                   |                    |                    |
|                    |                    |                      |                                     |                                                                                    |                                                                                      | <a href="#">131</a> | <a href="#">146</a>  | <a href="#">27</a> |                                                                                      |                   |                    |                    |
|                    |                    |                      |                                     |                                                                                    |                                                                                      | <a href="#">55</a>  | <a href="#">77</a>   | <a href="#">6</a>  |                                                                                      |                   |                    |                    |
| 31                 | PVX_049690         | hypothetical protein | 366                                 | 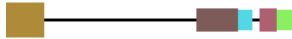 | <a href="#">298</a>                                                                  | <a href="#">312</a> | <a href="#">27</a>   |                    |                                                                                      |                   |                    |                    |
|                    |                    |                      |                                     |                                                                                    | <a href="#">299</a>                                                                  | <a href="#">310</a> | <a href="#">27</a>   |                    |                                                                                      |                   |                    |                    |
|                    |                    |                      |                                     |                                                                                    | <a href="#">299</a>                                                                  | <a href="#">310</a> | <a href="#">27</a>   |                    |                                                                                      |                   |                    |                    |
|                    |                    |                      |                                     |                                                                                    | <a href="#">244</a>                                                                  | <a href="#">295</a> | <a href="#">30</a>   |                    |                                                                                      |                   |                    |                    |
|                    |                    |                      |                                     |                                                                                    | <a href="#">298</a>                                                                  | <a href="#">313</a> | <a href="#">27</a>   |                    |                                                                                      |                   |                    |                    |
|                    |                    |                      |                                     |                                                                                    | <a href="#">298</a>                                                                  | <a href="#">312</a> | <a href="#">27</a>   |                    |                                                                                      |                   |                    |                    |
|                    |                    |                      |                                     |                                                                                    | <a href="#">298</a>                                                                  | <a href="#">313</a> | <a href="#">27</a>   |                    |                                                                                      |                   |                    |                    |
|                    |                    |                      |                                     |                                                                                    | <a href="#">325</a>                                                                  | <a href="#">343</a> | <a href="#">32</a>   |                    |                                                                                      |                   |                    |                    |
|                    |                    |                      |                                     |                                                                                    | <a href="#">325</a>                                                                  | <a href="#">345</a> | <a href="#">32</a>   |                    |                                                                                      |                   |                    |                    |
|                    |                    |                      |                                     |                                                                                    | <a href="#">325</a>                                                                  | <a href="#">343</a> | <a href="#">32</a>   |                    |                                                                                      |                   |                    |                    |
|                    |                    |                      |                                     |                                                                                    | <a href="#">325</a>                                                                  | <a href="#">343</a> | <a href="#">32</a>   |                    |                                                                                      |                   |                    |                    |
|                    |                    |                      |                                     |                                                                                    | <a href="#">299</a>                                                                  | <a href="#">310</a> | <a href="#">27</a>   |                    |                                                                                      |                   |                    |                    |
|                    |                    |                      |                                     |                                                                                    | <a href="#">326</a>                                                                  | <a href="#">343</a> | <a href="#">32</a>   |                    |                                                                                      |                   |                    |                    |
|                    |                    |                      |                                     |                                                                                    | <a href="#">347</a>                                                                  | <a href="#">366</a> | <a href="#">30</a>   |                    |                                                                                      |                   |                    |                    |
|                    |                    |                      |                                     |                                                                                    | <a href="#">326</a>                                                                  | <a href="#">343</a> | <a href="#">32</a>   |                    |                                                                                      |                   |                    |                    |
|                    |                    |                      |                                     |                                                                                    | <a href="#">298</a>                                                                  | <a href="#">312</a> | <a href="#">27</a>   |                    |                                                                                      |                   |                    |                    |
|                    |                    |                      |                                     |                                                                                    | <a href="#">298</a>                                                                  | <a href="#">313</a> | <a href="#">27</a>   |                    |                                                                                      |                   |                    |                    |
|                    |                    |                      |                                     |                                                                                    | <a href="#">1</a>                                                                    | <a href="#">49</a>  | <a href="#">46</a>   |                    |                                                                                      |                   |                    |                    |
|                    |                    |                      |                                     |                                                                                    | 32                                                                                   | PVX_037690          | hypothetical protein | 67                 |  | <a href="#">1</a> | <a href="#">13</a> | <a href="#">27</a> |
|                    |                    |                      |                                     |                                                                                    |                                                                                      |                     |                      |                    |                                                                                      | <a href="#">1</a> | <a href="#">13</a> | <a href="#">27</a> |
| <a href="#">1</a>  | <a href="#">13</a> | <a href="#">27</a>   |                                     |                                                                                    |                                                                                      |                     |                      |                    |                                                                                      |                   |                    |                    |
| <a href="#">1</a>  | <a href="#">14</a> | <a href="#">27</a>   |                                     |                                                                                    |                                                                                      |                     |                      |                    |                                                                                      |                   |                    |                    |
| <a href="#">1</a>  | <a href="#">13</a> | <a href="#">27</a>   |                                     |                                                                                    |                                                                                      |                     |                      |                    |                                                                                      |                   |                    |                    |
| <a href="#">1</a>  | <a href="#">14</a> | <a href="#">27</a>   |                                     |                                                                                    |                                                                                      |                     |                      |                    |                                                                                      |                   |                    |                    |
| <a href="#">25</a> | <a href="#">44</a> | <a href="#">32</a>   |                                     |                                                                                    |                                                                                      |                     |                      |                    |                                                                                      |                   |                    |                    |
| <a href="#">25</a> | <a href="#">46</a> | <a href="#">32</a>   |                                     |                                                                                    |                                                                                      |                     |                      |                    |                                                                                      |                   |                    |                    |
| <a href="#">25</a> | <a href="#">44</a> | <a href="#">32</a>   |                                     |                                                                                    |                                                                                      |                     |                      |                    |                                                                                      |                   |                    |                    |
| <a href="#">26</a> | <a href="#">44</a> | <a href="#">32</a>   |                                     |                                                                                    |                                                                                      |                     |                      |                    |                                                                                      |                   |                    |                    |
| <a href="#">1</a>  | <a href="#">13</a> | <a href="#">27</a>   |                                     |                                                                                    |                                                                                      |                     |                      |                    |                                                                                      |                   |                    |                    |
| <a href="#">27</a> | <a href="#">44</a> | <a href="#">32</a>   |                                     |                                                                                    |                                                                                      |                     |                      |                    |                                                                                      |                   |                    |                    |
| <a href="#">48</a> | <a href="#">64</a> | <a href="#">30</a>   |                                     |                                                                                    |                                                                                      |                     |                      |                    |                                                                                      |                   |                    |                    |
| <a href="#">27</a> | <a href="#">44</a> | <a href="#">32</a>   |                                     |                                                                                    |                                                                                      |                     |                      |                    |                                                                                      |                   |                    |                    |
| <a href="#">1</a>  | <a href="#">13</a> | <a href="#">27</a>   |                                     |                                                                                    |                                                                                      |                     |                      |                    |                                                                                      |                   |                    |                    |
| 33                 | Not clustered      | PVX_094245           | variable surface protein Vir12-like | 584                                                                                |  | <a href="#">515</a> | <a href="#">529</a>  | <a href="#">27</a> |                                                                                      |                   |                    |                    |
|                    |                    |                      |                                     |                                                                                    |                                                                                      | <a href="#">515</a> | <a href="#">529</a>  | <a href="#">27</a> |                                                                                      |                   |                    |                    |
|                    |                    |                      |                                     |                                                                                    |                                                                                      | <a href="#">134</a> | <a href="#">162</a>  | <a href="#">39</a> |                                                                                      |                   |                    |                    |



|    |                     |                     |                                          |     |  |  |                     |                     |                    |
|----|---------------------|---------------------|------------------------------------------|-----|--|--|---------------------|---------------------|--------------------|
| 35 | E                   | PVX_106220          | variable surface protein Vir12, putative | 481 |  |  | <a href="#">1</a>   | <a href="#">9</a>   | <a href="#">9</a>  |
|    |                     |                     |                                          |     |  |  | <a href="#">444</a> | <a href="#">466</a> | <a href="#">6</a>  |
|    |                     |                     |                                          |     |  |  | <a href="#">196</a> | <a href="#">214</a> | <a href="#">46</a> |
|    |                     |                     |                                          |     |  |  | <a href="#">75</a>  | <a href="#">86</a>  | <a href="#">72</a> |
|    |                     |                     |                                          |     |  |  | <a href="#">163</a> | <a href="#">183</a> | <a href="#">40</a> |
|    |                     |                     |                                          |     |  |  | <a href="#">465</a> | <a href="#">479</a> | <a href="#">27</a> |
|    |                     |                     |                                          |     |  |  | <a href="#">465</a> | <a href="#">479</a> | <a href="#">27</a> |
|    |                     |                     |                                          |     |  |  | <a href="#">465</a> | <a href="#">479</a> | <a href="#">27</a> |
|    |                     |                     |                                          |     |  |  | <a href="#">51</a>  | <a href="#">75</a>  | <a href="#">28</a> |
|    |                     |                     |                                          |     |  |  | <a href="#">50</a>  | <a href="#">67</a>  | <a href="#">28</a> |
|    |                     |                     |                                          |     |  |  | <a href="#">250</a> | <a href="#">319</a> | <a href="#">4</a>  |
|    |                     |                     |                                          |     |  |  | <a href="#">413</a> | <a href="#">462</a> | <a href="#">30</a> |
|    |                     |                     |                                          |     |  |  | <a href="#">465</a> | <a href="#">474</a> | <a href="#">27</a> |
|    |                     |                     |                                          |     |  |  | <a href="#">249</a> | <a href="#">319</a> | <a href="#">4</a>  |
|    |                     |                     |                                          |     |  |  | <a href="#">465</a> | <a href="#">479</a> | <a href="#">27</a> |
|    |                     |                     |                                          |     |  |  | <a href="#">465</a> | <a href="#">474</a> | <a href="#">27</a> |
|    |                     |                     |                                          |     |  |  | <a href="#">16</a>  | <a href="#">48</a>  | <a href="#">23</a> |
|    |                     |                     |                                          |     |  |  | <a href="#">54</a>  | <a href="#">64</a>  | <a href="#">28</a> |
|    |                     |                     |                                          |     |  |  | <a href="#">103</a> | <a href="#">167</a> | <a href="#">39</a> |
|    |                     |                     |                                          |     |  |  | <a href="#">194</a> | <a href="#">216</a> | <a href="#">46</a> |
|    |                     |                     |                                          |     |  |  | <a href="#">17</a>  | <a href="#">31</a>  | <a href="#">23</a> |
|    |                     |                     |                                          |     |  |  | <a href="#">198</a> | <a href="#">217</a> | <a href="#">46</a> |
|    |                     |                     |                                          |     |  |  | <a href="#">56</a>  | <a href="#">104</a> | <a href="#">72</a> |
|    |                     |                     |                                          |     |  |  | <a href="#">465</a> | <a href="#">479</a> | <a href="#">27</a> |
|    |                     |                     |                                          |     |  |  | <a href="#">226</a> | <a href="#">244</a> | <a href="#">5</a>  |
|    |                     |                     |                                          |     |  |  | <a href="#">225</a> | <a href="#">248</a> | <a href="#">5</a>  |
|    |                     |                     |                                          |     |  |  | <a href="#">465</a> | <a href="#">479</a> | <a href="#">27</a> |
|    |                     |                     |                                          |     |  |  | <a href="#">465</a> | <a href="#">474</a> | <a href="#">27</a> |
|    |                     |                     |                                          |     |  |  | <a href="#">261</a> | <a href="#">317</a> | <a href="#">4</a>  |
|    | <a href="#">93</a>  | <a href="#">102</a> | <a href="#">4</a>                        |     |  |  |                     |                     |                    |
|    | <a href="#">251</a> | <a href="#">319</a> | <a href="#">4</a>                        |     |  |  |                     |                     |                    |
|    | <a href="#">389</a> | <a href="#">411</a> | <a href="#">6</a>                        |     |  |  |                     |                     |                    |
|    | <a href="#">201</a> | <a href="#">219</a> | <a href="#">46</a>                       |     |  |  |                     |                     |                    |
|    | <a href="#">80</a>  | <a href="#">91</a>  | <a href="#">72</a>                       |     |  |  |                     |                     |                    |
|    | <a href="#">168</a> | <a href="#">188</a> | <a href="#">40</a>                       |     |  |  |                     |                     |                    |
| 36 | E                   | PVX_017140          | variable surface protein Vir12-like      | 568 |  |  | <a href="#">499</a> | <a href="#">513</a> | <a href="#">27</a> |
|    |                     |                     |                                          |     |  |  | <a href="#">499</a> | <a href="#">513</a> | <a href="#">27</a> |
|    |                     |                     |                                          |     |  |  | <a href="#">499</a> | <a href="#">513</a> | <a href="#">27</a> |
|    |                     |                     |                                          |     |  |  | <a href="#">47</a>  | <a href="#">61</a>  | <a href="#">28</a> |
|    |                     |                     |                                          |     |  |  | <a href="#">46</a>  | <a href="#">66</a>  | <a href="#">28</a> |
|    |                     |                     |                                          |     |  |  | <a href="#">244</a> | <a href="#">313</a> | <a href="#">4</a>  |
|    |                     |                     |                                          |     |  |  | <a href="#">447</a> | <a href="#">496</a> | <a href="#">30</a> |
|    |                     |                     |                                          |     |  |  | <a href="#">499</a> | <a href="#">514</a> | <a href="#">27</a> |
|    |                     |                     |                                          |     |  |  | <a href="#">12</a>  | <a href="#">25</a>  | <a href="#">23</a> |
|    |                     |                     |                                          |     |  |  | <a href="#">243</a> | <a href="#">313</a> | <a href="#">4</a>  |





|                     |                     |                    |                                     |     |                                                                                      |                     |                     |                    |
|---------------------|---------------------|--------------------|-------------------------------------|-----|--------------------------------------------------------------------------------------|---------------------|---------------------|--------------------|
|                     |                     |                    |                                     |     |                                                                                      | <a href="#">500</a> | <a href="#">514</a> | <a href="#">27</a> |
|                     |                     |                    |                                     |     |                                                                                      | <a href="#">529</a> | <a href="#">548</a> | <a href="#">32</a> |
|                     |                     |                    |                                     |     |                                                                                      | <a href="#">549</a> | <a href="#">569</a> | <a href="#">30</a> |
|                     |                     |                    |                                     |     |                                                                                      | <a href="#">529</a> | <a href="#">546</a> | <a href="#">32</a> |
|                     |                     |                    |                                     |     |                                                                                      | <a href="#">500</a> | <a href="#">514</a> | <a href="#">27</a> |
|                     |                     |                    |                                     |     |                                                                                      | <a href="#">210</a> | <a href="#">251</a> | <a href="#">4</a>  |
|                     |                     |                    |                                     |     |                                                                                      | <a href="#">254</a> | <a href="#">276</a> | <a href="#">4</a>  |
|                     |                     |                    |                                     |     |                                                                                      | <a href="#">500</a> | <a href="#">515</a> | <a href="#">27</a> |
|                     |                     |                    |                                     |     |                                                                                      | <a href="#">1</a>   | <a href="#">12</a>  | <a href="#">9</a>  |
|                     |                     |                    |                                     |     |                                                                                      | <a href="#">75</a>  | <a href="#">88</a>  | <a href="#">72</a> |
|                     |                     |                    |                                     |     |                                                                                      | <a href="#">75</a>  | <a href="#">86</a>  | <a href="#">72</a> |
|                     |                     |                    |                                     |     |                                                                                      | <a href="#">162</a> | <a href="#">182</a> | <a href="#">40</a> |
| 39                  | E                   | PVX_013620         | variable surface protein Vir12-like | 537 |  | <a href="#">468</a> | <a href="#">482</a> | <a href="#">27</a> |
|                     |                     |                    |                                     |     |                                                                                      | <a href="#">468</a> | <a href="#">482</a> | <a href="#">27</a> |
|                     |                     |                    |                                     |     |                                                                                      | <a href="#">468</a> | <a href="#">482</a> | <a href="#">27</a> |
|                     |                     |                    |                                     |     |                                                                                      | <a href="#">380</a> | <a href="#">413</a> | <a href="#">4</a>  |
|                     |                     |                    |                                     |     |                                                                                      | <a href="#">415</a> | <a href="#">465</a> | <a href="#">30</a> |
|                     |                     |                    |                                     |     |                                                                                      | <a href="#">468</a> | <a href="#">483</a> | <a href="#">27</a> |
|                     |                     |                    |                                     |     |                                                                                      | <a href="#">468</a> | <a href="#">482</a> | <a href="#">27</a> |
|                     |                     |                    |                                     |     |                                                                                      | <a href="#">468</a> | <a href="#">483</a> | <a href="#">27</a> |
|                     |                     |                    |                                     |     |                                                                                      | <a href="#">13</a>  | <a href="#">44</a>  | <a href="#">23</a> |
|                     |                     |                    |                                     |     |                                                                                      | <a href="#">267</a> | <a href="#">276</a> | <a href="#">8</a>  |
|                     |                     |                    |                                     |     |                                                                                      | <a href="#">94</a>  | <a href="#">161</a> | <a href="#">39</a> |
|                     |                     |                    |                                     |     |                                                                                      | <a href="#">495</a> | <a href="#">515</a> | <a href="#">32</a> |
|                     |                     |                    |                                     |     |                                                                                      | <a href="#">139</a> | <a href="#">149</a> | <a href="#">39</a> |
|                     |                     |                    |                                     |     |                                                                                      | <a href="#">495</a> | <a href="#">514</a> | <a href="#">32</a> |
|                     |                     |                    |                                     |     |                                                                                      | <a href="#">191</a> | <a href="#">209</a> | <a href="#">46</a> |
|                     |                     |                    |                                     |     |                                                                                      | <a href="#">300</a> | <a href="#">325</a> | <a href="#">4</a>  |
|                     |                     |                    |                                     |     |                                                                                      | <a href="#">52</a>  | <a href="#">97</a>  | <a href="#">72</a> |
|                     |                     |                    |                                     |     |                                                                                      | <a href="#">495</a> | <a href="#">514</a> | <a href="#">32</a> |
|                     |                     |                    |                                     |     |                                                                                      | <a href="#">496</a> | <a href="#">514</a> | <a href="#">32</a> |
|                     |                     |                    |                                     |     |                                                                                      | <a href="#">468</a> | <a href="#">482</a> | <a href="#">27</a> |
| <a href="#">497</a> | <a href="#">516</a> | <a href="#">32</a> |                                     |     |                                                                                      |                     |                     |                    |
| <a href="#">517</a> | <a href="#">537</a> | <a href="#">30</a> |                                     |     |                                                                                      |                     |                     |                    |
| <a href="#">497</a> | <a href="#">514</a> | <a href="#">32</a> |                                     |     |                                                                                      |                     |                     |                    |
| <a href="#">468</a> | <a href="#">482</a> | <a href="#">27</a> |                                     |     |                                                                                      |                     |                     |                    |
| <a href="#">210</a> | <a href="#">266</a> | <a href="#">4</a>  |                                     |     |                                                                                      |                     |                     |                    |
| <a href="#">468</a> | <a href="#">483</a> | <a href="#">27</a> |                                     |     |                                                                                      |                     |                     |                    |
| <a href="#">1</a>   | <a href="#">12</a>  | <a href="#">9</a>  |                                     |     |                                                                                      |                     |                     |                    |
| <a href="#">75</a>  | <a href="#">86</a>  | <a href="#">72</a> |                                     |     |                                                                                      |                     |                     |                    |
| <a href="#">162</a> | <a href="#">182</a> | <a href="#">40</a> |                                     |     |                                                                                      |                     |                     |                    |
| 40                  | E                   | PVX_077695         | variable surface protein Vir12-like | 545 |  | <a href="#">476</a> | <a href="#">490</a> | <a href="#">27</a> |
|                     |                     |                    |                                     |     |                                                                                      | <a href="#">476</a> | <a href="#">490</a> | <a href="#">27</a> |
|                     |                     |                    |                                     |     |                                                                                      | <a href="#">476</a> | <a href="#">490</a> | <a href="#">27</a> |
|                     |                     |                    |                                     |     |                                                                                      | <a href="#">46</a>  | <a href="#">67</a>  | <a href="#">28</a> |



|    |   |            |                                           |     |                                                                                      |                     |                     |                    |
|----|---|------------|-------------------------------------------|-----|--------------------------------------------------------------------------------------|---------------------|---------------------|--------------------|
|    |   |            |                                           |     |                                                                                      | <a href="#">590</a> | <a href="#">609</a> | <a href="#">32</a> |
|    |   |            |                                           |     |                                                                                      | <a href="#">610</a> | <a href="#">630</a> | <a href="#">30</a> |
|    |   |            |                                           |     |                                                                                      | <a href="#">590</a> | <a href="#">607</a> | <a href="#">32</a> |
|    |   |            |                                           |     |                                                                                      | <a href="#">561</a> | <a href="#">575</a> | <a href="#">27</a> |
|    |   |            |                                           |     |                                                                                      | <a href="#">561</a> | <a href="#">575</a> | <a href="#">27</a> |
|    |   |            |                                           |     |                                                                                      | <a href="#">76</a>  | <a href="#">89</a>  | <a href="#">72</a> |
|    |   |            |                                           |     |                                                                                      | <a href="#">1</a>   | <a href="#">12</a>  | <a href="#">9</a>  |
|    |   |            |                                           |     |                                                                                      | <a href="#">76</a>  | <a href="#">87</a>  | <a href="#">72</a> |
|    |   |            |                                           |     |                                                                                      | <a href="#">163</a> | <a href="#">182</a> | <a href="#">40</a> |
|    |   |            |                                           |     |                                                                                      | <a href="#">439</a> | <a href="#">453</a> | <a href="#">27</a> |
|    |   |            |                                           |     |                                                                                      | <a href="#">439</a> | <a href="#">453</a> | <a href="#">27</a> |
|    |   |            |                                           |     |                                                                                      | <a href="#">439</a> | <a href="#">453</a> | <a href="#">27</a> |
|    |   |            |                                           |     |                                                                                      | <a href="#">45</a>  | <a href="#">69</a>  | <a href="#">28</a> |
|    |   |            |                                           |     |                                                                                      | <a href="#">48</a>  | <a href="#">60</a>  | <a href="#">28</a> |
|    |   |            |                                           |     |                                                                                      | <a href="#">389</a> | <a href="#">436</a> | <a href="#">30</a> |
|    |   |            |                                           |     |                                                                                      | <a href="#">439</a> | <a href="#">454</a> | <a href="#">27</a> |
|    |   |            |                                           |     |                                                                                      | <a href="#">15</a>  | <a href="#">25</a>  | <a href="#">23</a> |
|    |   |            |                                           |     |                                                                                      | <a href="#">439</a> | <a href="#">453</a> | <a href="#">27</a> |
|    |   |            |                                           |     |                                                                                      | <a href="#">439</a> | <a href="#">454</a> | <a href="#">27</a> |
|    |   |            |                                           |     |                                                                                      | <a href="#">11</a>  | <a href="#">43</a>  | <a href="#">23</a> |
|    |   |            |                                           |     |                                                                                      | <a href="#">94</a>  | <a href="#">161</a> | <a href="#">39</a> |
|    |   |            |                                           |     |                                                                                      | <a href="#">466</a> | <a href="#">486</a> | <a href="#">32</a> |
|    |   |            |                                           |     |                                                                                      | <a href="#">139</a> | <a href="#">149</a> | <a href="#">39</a> |
|    |   |            |                                           |     |                                                                                      | <a href="#">466</a> | <a href="#">485</a> | <a href="#">32</a> |
|    |   |            |                                           |     |                                                                                      | <a href="#">188</a> | <a href="#">209</a> | <a href="#">46</a> |
|    |   |            |                                           |     |                                                                                      | <a href="#">51</a>  | <a href="#">96</a>  | <a href="#">72</a> |
|    |   |            |                                           |     |                                                                                      | <a href="#">466</a> | <a href="#">485</a> | <a href="#">32</a> |
|    |   |            |                                           |     |                                                                                      | <a href="#">467</a> | <a href="#">485</a> | <a href="#">32</a> |
|    |   |            |                                           |     |                                                                                      | <a href="#">439</a> | <a href="#">453</a> | <a href="#">27</a> |
|    |   |            |                                           |     |                                                                                      | <a href="#">213</a> | <a href="#">241</a> | <a href="#">5</a>  |
|    |   |            |                                           |     |                                                                                      | <a href="#">213</a> | <a href="#">241</a> | <a href="#">5</a>  |
|    |   |            |                                           |     |                                                                                      | <a href="#">468</a> | <a href="#">487</a> | <a href="#">32</a> |
|    |   |            |                                           |     |                                                                                      | <a href="#">488</a> | <a href="#">508</a> | <a href="#">30</a> |
|    |   |            |                                           |     |                                                                                      | <a href="#">468</a> | <a href="#">485</a> | <a href="#">32</a> |
|    |   |            |                                           |     |                                                                                      | <a href="#">439</a> | <a href="#">453</a> | <a href="#">27</a> |
|    |   |            |                                           |     |                                                                                      | <a href="#">439</a> | <a href="#">454</a> | <a href="#">27</a> |
|    |   |            |                                           |     |                                                                                      | <a href="#">363</a> | <a href="#">385</a> | <a href="#">6</a>  |
|    |   |            |                                           |     |                                                                                      | <a href="#">74</a>  | <a href="#">85</a>  | <a href="#">72</a> |
|    |   |            |                                           |     |                                                                                      | <a href="#">162</a> | <a href="#">182</a> | <a href="#">40</a> |
|    |   |            |                                           |     |                                                                                      | <a href="#">372</a> | <a href="#">386</a> | <a href="#">27</a> |
|    |   |            |                                           |     |                                                                                      | <a href="#">372</a> | <a href="#">386</a> | <a href="#">27</a> |
|    |   |            |                                           |     |                                                                                      | <a href="#">372</a> | <a href="#">386</a> | <a href="#">27</a> |
|    |   |            |                                           |     |                                                                                      | <a href="#">45</a>  | <a href="#">70</a>  | <a href="#">28</a> |
|    |   |            |                                           |     |                                                                                      | <a href="#">321</a> | <a href="#">369</a> | <a href="#">30</a> |
|    |   |            |                                           |     |                                                                                      | <a href="#">372</a> | <a href="#">387</a> | <a href="#">27</a> |
| 42 | E | PVX_097525 | variable surface protein Vir 12, putative | 508 |  |                     |                     |                    |
| 43 | L | PVX_102640 | variable surface protein Vir12-related    | 441 |  |                     |                     |                    |









|    |               |            |                                                     |     |  |                     |                     |                    |
|----|---------------|------------|-----------------------------------------------------|-----|--|---------------------|---------------------|--------------------|
|    |               |            |                                                     |     |  | <a href="#">298</a> | <a href="#">311</a> | <a href="#">7</a>  |
|    |               |            |                                                     |     |  | <a href="#">19</a>  | <a href="#">28</a>  | <a href="#">4</a>  |
|    |               |            |                                                     |     |  | <a href="#">219</a> | <a href="#">277</a> | <a href="#">5</a>  |
|    |               |            |                                                     |     |  | <a href="#">219</a> | <a href="#">277</a> | <a href="#">5</a>  |
|    |               |            |                                                     |     |  | <a href="#">278</a> | <a href="#">301</a> | <a href="#">4</a>  |
|    |               |            |                                                     |     |  | <a href="#">144</a> | <a href="#">154</a> | <a href="#">39</a> |
|    |               |            |                                                     |     |  | <a href="#">313</a> | <a href="#">331</a> | <a href="#">8</a>  |
|    |               |            |                                                     |     |  | <a href="#">193</a> | <a href="#">215</a> | <a href="#">46</a> |
|    |               |            |                                                     |     |  | <a href="#">144</a> | <a href="#">155</a> | <a href="#">39</a> |
|    |               |            |                                                     |     |  | <a href="#">104</a> | <a href="#">134</a> | <a href="#">6</a>  |
|    |               |            |                                                     |     |  | <a href="#">49</a>  | <a href="#">73</a>  | <a href="#">28</a> |
|    |               |            |                                                     |     |  | <a href="#">29</a>  | <a href="#">45</a>  | <a href="#">4</a>  |
|    |               |            |                                                     |     |  | <a href="#">313</a> | <a href="#">331</a> | <a href="#">8</a>  |
|    |               |            |                                                     |     |  | <a href="#">76</a>  | <a href="#">89</a>  | <a href="#">72</a> |
|    |               |            |                                                     |     |  | <a href="#">297</a> | <a href="#">311</a> | <a href="#">7</a>  |
|    |               |            |                                                     |     |  | <a href="#">297</a> | <a href="#">311</a> | <a href="#">7</a>  |
|    |               |            |                                                     |     |  | <a href="#">199</a> | <a href="#">217</a> | <a href="#">46</a> |
|    |               |            |                                                     |     |  | <a href="#">167</a> | <a href="#">180</a> | <a href="#">40</a> |
|    |               |            |                                                     |     |  | <a href="#">79</a>  | <a href="#">95</a>  | <a href="#">40</a> |
|    |               |            |                                                     |     |  | <a href="#">45</a>  | <a href="#">74</a>  | <a href="#">39</a> |
|    |               |            |                                                     |     |  | <a href="#">1</a>   | <a href="#">13</a>  | <a href="#">72</a> |
|    |               |            |                                                     |     |  | <a href="#">286</a> | <a href="#">299</a> | <a href="#">7</a>  |
|    |               |            |                                                     |     |  | <a href="#">247</a> | <a href="#">260</a> | <a href="#">7</a>  |
|    |               |            |                                                     |     |  | <a href="#">129</a> | <a href="#">186</a> | <a href="#">5</a>  |
|    |               |            |                                                     |     |  | <a href="#">129</a> | <a href="#">186</a> | <a href="#">5</a>  |
|    |               |            |                                                     |     |  | <a href="#">188</a> | <a href="#">211</a> | <a href="#">4</a>  |
|    |               |            |                                                     |     |  | <a href="#">300</a> | <a href="#">315</a> | <a href="#">8</a>  |
|    |               |            |                                                     |     |  | <a href="#">223</a> | <a href="#">244</a> | <a href="#">8</a>  |
|    |               |            |                                                     |     |  | <a href="#">262</a> | <a href="#">284</a> | <a href="#">8</a>  |
|    |               |            |                                                     |     |  | <a href="#">14</a>  | <a href="#">44</a>  | <a href="#">6</a>  |
|    |               |            |                                                     |     |  | <a href="#">301</a> | <a href="#">315</a> | <a href="#">8</a>  |
|    |               |            |                                                     |     |  | <a href="#">223</a> | <a href="#">243</a> | <a href="#">8</a>  |
|    |               |            |                                                     |     |  | <a href="#">262</a> | <a href="#">284</a> | <a href="#">8</a>  |
|    |               |            |                                                     |     |  | <a href="#">246</a> | <a href="#">260</a> | <a href="#">7</a>  |
|    |               |            |                                                     |     |  | <a href="#">286</a> | <a href="#">299</a> | <a href="#">7</a>  |
|    |               |            |                                                     |     |  | <a href="#">208</a> | <a href="#">221</a> | <a href="#">7</a>  |
|    |               |            |                                                     |     |  | <a href="#">286</a> | <a href="#">299</a> | <a href="#">7</a>  |
|    |               |            |                                                     |     |  | <a href="#">246</a> | <a href="#">260</a> | <a href="#">7</a>  |
|    |               |            |                                                     |     |  | <a href="#">208</a> | <a href="#">221</a> | <a href="#">7</a>  |
|    |               |            |                                                     |     |  | <a href="#">109</a> | <a href="#">128</a> | <a href="#">46</a> |
|    |               |            |                                                     |     |  | <a href="#">77</a>  | <a href="#">95</a>  | <a href="#">40</a> |
|    |               |            |                                                     |     |  | <a href="#">30</a>  | <a href="#">43</a>  | <a href="#">4</a>  |
|    |               |            |                                                     |     |  | <a href="#">76</a>  | <a href="#">104</a> | <a href="#">72</a> |
|    |               |            |                                                     |     |  | <a href="#">18</a>  | <a href="#">29</a>  | <a href="#">4</a>  |
|    |               |            |                                                     |     |  | <a href="#">53</a>  | <a href="#">101</a> | <a href="#">72</a> |
| 50 | Not clustered | PVX_157260 | variable surface protein Vir12, truncated, putative | 315 |  |                     |                     |                    |
| 51 | Not clustered | PVX_134260 | variable surface protein Vir12, putative, truncated | 104 |  |                     |                     |                    |



|     |     |            |                                            |     |                                                                                      |     |     |    |
|-----|-----|------------|--------------------------------------------|-----|--------------------------------------------------------------------------------------|-----|-----|----|
| 60  | E   | PVX_009595 | variable surface protein Vir22, putative   | 392 |    | 65  | 85  | 72 |
|     |     |            |                                            |     |                                                                                      | 141 | 159 | 39 |
|     |     |            |                                            |     |                                                                                      | 51  | 73  | 28 |
|     |     |            |                                            |     |                                                                                      | 114 | 146 | 13 |
|     |     |            |                                            |     |                                                                                      | 334 | 354 | 74 |
|     |     |            |                                            |     |                                                                                      | 55  | 108 | 72 |
|     |     |            |                                            |     |                                                                                      | 335 | 343 | 74 |
|     |     |            |                                            |     |                                                                                      | 75  | 95  | 72 |
|     |     |            |                                            |     |                                                                                      | 173 | 196 | 40 |
|     |     |            |                                            |     |                                                                                      | 293 | 310 | 74 |
| 61  | E   | PVX_110300 | variable surface protein Vir 12/22/24-like | 359 |    | 293 | 310 | 74 |
|     |     |            |                                            |     |                                                                                      | 4   | 45  | 7  |
|     |     |            |                                            |     |                                                                                      | 4   | 46  | 7  |
|     |     |            |                                            |     |                                                                                      | 350 | 357 | 4  |
|     |     |            |                                            |     |                                                                                      | 110 | 148 | 13 |
|     |     |            |                                            |     |                                                                                      | 149 | 159 | 39 |
|     |     |            |                                            |     |                                                                                      | 301 | 321 | 74 |
|     |     |            |                                            |     |                                                                                      | 149 | 161 | 39 |
|     |     |            |                                            |     |                                                                                      | 203 | 226 | 46 |
|     |     |            |                                            |     |                                                                                      | 304 | 313 | 74 |
| 62  | E   | PVX_007085 | variable surface protein Vir24-related     | 321 |  | 46  | 72  | 28 |
|     |     |            |                                            |     |                                                                                      | 78  | 98  | 72 |
|     |     |            |                                            |     |                                                                                      | 139 | 160 | 40 |
|     |     |            |                                            |     |                                                                                      | 259 | 276 | 74 |
|     |     |            |                                            |     |                                                                                      | 259 | 276 | 74 |
|     |     |            |                                            |     |                                                                                      | 308 | 319 | 4  |
|     |     |            |                                            |     |                                                                                      | 266 | 283 | 74 |
|     |     |            |                                            |     |                                                                                      | 113 | 121 | 39 |
|     |     |            |                                            |     |                                                                                      | 50  | 62  | 72 |
|     |     |            |                                            |     |                                                                                      | 266 | 283 | 74 |
| 63  | E   | PVX_088805 | variable surface protein Vir22/24-like     | 358 |  | 168 | 190 | 46 |
|     |     |            |                                            |     |                                                                                      | 24  | 84  | 72 |
|     |     |            |                                            |     |                                                                                      | 269 | 279 | 74 |
|     |     |            |                                            |     |                                                                                      | 8   | 32  | 28 |
|     |     |            |                                            |     |                                                                                      | 166 | 188 | 40 |
|     |     |            |                                            |     |                                                                                      | 293 | 313 | 74 |
|     |     |            |                                            |     |                                                                                      | 49  | 63  | 28 |
|     |     |            |                                            |     |                                                                                      | 293 | 313 | 74 |
|     |     |            |                                            |     |                                                                                      | 345 | 355 | 4  |
|     |     |            |                                            |     |                                                                                      | 13  | 28  | 23 |
| 102 | 140 | 13         |                                            |     |                                                                                      |     |     |    |
| 14  | 40  | 23         |                                            |     |                                                                                      |     |     |    |
| 292 | 305 | 13         |                                            |     |                                                                                      |     |     |    |
| 199 | 217 | 46         |                                            |     |                                                                                      |     |     |    |
| 301 | 316 | 74         |                                            |     |                                                                                      |     |     |    |

|    |   |            |                                           |     |                                                                                      |    |                     |                     |                                     |     |                                                                                      |  |  |  |  |
|----|---|------------|-------------------------------------------|-----|--------------------------------------------------------------------------------------|----|---------------------|---------------------|-------------------------------------|-----|--------------------------------------------------------------------------------------|--|--|--|--|
|    |   |            |                                           |     |                                                                                      |    | <a href="#">199</a> | <a href="#">220</a> | <a href="#">46</a>                  |     |                                                                                      |  |  |  |  |
|    |   |            |                                           |     |                                                                                      |    | <a href="#">304</a> | <a href="#">313</a> | <a href="#">74</a>                  |     |                                                                                      |  |  |  |  |
|    |   |            |                                           |     |                                                                                      |    | <a href="#">162</a> | <a href="#">184</a> | <a href="#">40</a>                  |     |                                                                                      |  |  |  |  |
|    |   |            |                                           |     |                                                                                      |    | <a href="#">39</a>  | <a href="#">65</a>  | <a href="#">28</a>                  |     |                                                                                      |  |  |  |  |
|    |   |            |                                           |     |                                                                                      |    | <a href="#">202</a> | <a href="#">219</a> | <a href="#">46</a>                  |     |                                                                                      |  |  |  |  |
| 64 | E | PVX_081850 | variable surface protein Vir22/23-related | 608 |    |    | <a href="#">432</a> | <a href="#">455</a> | <a href="#">40</a>                  |     |                                                                                      |  |  |  |  |
|    |   |            |                                           |     |                                                                                      |    | <a href="#">180</a> | <a href="#">197</a> | <a href="#">40</a>                  |     |                                                                                      |  |  |  |  |
|    |   |            |                                           |     |                                                                                      |    | <a href="#">544</a> | <a href="#">563</a> | <a href="#">74</a>                  |     |                                                                                      |  |  |  |  |
|    |   |            |                                           |     |                                                                                      |    | <a href="#">205</a> | <a href="#">230</a> | <a href="#">5</a>                   |     |                                                                                      |  |  |  |  |
|    |   |            |                                           |     |                                                                                      |    | <a href="#">138</a> | <a href="#">175</a> | <a href="#">17</a>                  |     |                                                                                      |  |  |  |  |
|    |   |            |                                           |     |                                                                                      |    | <a href="#">544</a> | <a href="#">563</a> | <a href="#">74</a>                  |     |                                                                                      |  |  |  |  |
|    |   |            |                                           |     |                                                                                      |    | <a href="#">596</a> | <a href="#">607</a> | <a href="#">4</a>                   |     |                                                                                      |  |  |  |  |
|    |   |            |                                           |     |                                                                                      |    | <a href="#">461</a> | <a href="#">482</a> | <a href="#">46</a>                  |     |                                                                                      |  |  |  |  |
|    |   |            |                                           |     |                                                                                      |    | <a href="#">551</a> | <a href="#">580</a> | <a href="#">74</a>                  |     |                                                                                      |  |  |  |  |
|    |   |            |                                           |     |                                                                                      |    | <a href="#">463</a> | <a href="#">485</a> | <a href="#">46</a>                  |     |                                                                                      |  |  |  |  |
|    |   |            |                                           |     |                                                                                      |    | <a href="#">554</a> | <a href="#">562</a> | <a href="#">74</a>                  |     |                                                                                      |  |  |  |  |
|    |   |            |                                           |     |                                                                                      |    | <a href="#">89</a>  | <a href="#">101</a> | <a href="#">72</a>                  |     |                                                                                      |  |  |  |  |
|    |   |            |                                           |     |                                                                                      |    | <a href="#">343</a> | <a href="#">357</a> | <a href="#">72</a>                  |     |                                                                                      |  |  |  |  |
|    |   |            |                                           |     |                                                                                      |    | <a href="#">431</a> | <a href="#">453</a> | <a href="#">74</a>                  |     |                                                                                      |  |  |  |  |
| 65 | E | PVX_093720 | variable surface protein Vir24-like       | 496 |  |    | <a href="#">66</a>  | <a href="#">82</a>  | <a href="#">28</a>                  |     |                                                                                      |  |  |  |  |
|    |   |            |                                           |     |                                                                                      |    | <a href="#">431</a> | <a href="#">453</a> | <a href="#">74</a>                  |     |                                                                                      |  |  |  |  |
|    |   |            |                                           |     |                                                                                      |    | <a href="#">439</a> | <a href="#">456</a> | <a href="#">74</a>                  |     |                                                                                      |  |  |  |  |
|    |   |            |                                           |     |                                                                                      |    | <a href="#">114</a> | <a href="#">178</a> | <a href="#">39</a>                  |     |                                                                                      |  |  |  |  |
|    |   |            |                                           |     |                                                                                      |    | <a href="#">155</a> | <a href="#">165</a> | <a href="#">39</a>                  |     |                                                                                      |  |  |  |  |
|    |   |            |                                           |     |                                                                                      |    | <a href="#">210</a> | <a href="#">227</a> | <a href="#">46</a>                  |     |                                                                                      |  |  |  |  |
|    |   |            |                                           |     |                                                                                      |    | <a href="#">439</a> | <a href="#">459</a> | <a href="#">74</a>                  |     |                                                                                      |  |  |  |  |
|    |   |            |                                           |     |                                                                                      |    | <a href="#">212</a> | <a href="#">228</a> | <a href="#">46</a>                  |     |                                                                                      |  |  |  |  |
|    |   |            |                                           |     |                                                                                      |    | <a href="#">66</a>  | <a href="#">120</a> | <a href="#">72</a>                  |     |                                                                                      |  |  |  |  |
|    |   |            |                                           |     |                                                                                      |    | <a href="#">442</a> | <a href="#">455</a> | <a href="#">74</a>                  |     |                                                                                      |  |  |  |  |
|    |   |            |                                           |     |                                                                                      |    | <a href="#">257</a> | <a href="#">330</a> | <a href="#">6</a>                   |     |                                                                                      |  |  |  |  |
|    |   |            |                                           |     |                                                                                      |    | <a href="#">88</a>  | <a href="#">100</a> | <a href="#">72</a>                  |     |                                                                                      |  |  |  |  |
|    |   |            |                                           |     |                                                                                      |    | <a href="#">402</a> | <a href="#">425</a> | <a href="#">40</a>                  |     |                                                                                      |  |  |  |  |
|    |   |            |                                           |     |                                                                                      |    | <a href="#">130</a> | <a href="#">167</a> | <a href="#">17</a>                  |     |                                                                                      |  |  |  |  |
| 66 | E | PVX_002480 | variable surface protein Vir12/24-related | 616 |  |    | <a href="#">346</a> | <a href="#">376</a> | <a href="#">13</a>                  |     |                                                                                      |  |  |  |  |
|    |   |            |                                           |     |                                                                                      |    | <a href="#">250</a> | <a href="#">280</a> | <a href="#">23</a>                  |     |                                                                                      |  |  |  |  |
|    |   |            |                                           |     |                                                                                      |    | <a href="#">288</a> | <a href="#">300</a> | <a href="#">28</a>                  |     |                                                                                      |  |  |  |  |
|    |   |            |                                           |     |                                                                                      |    | <a href="#">558</a> | <a href="#">573</a> | <a href="#">74</a>                  |     |                                                                                      |  |  |  |  |
|    |   |            |                                           |     |                                                                                      |    | <a href="#">435</a> | <a href="#">457</a> | <a href="#">46</a>                  |     |                                                                                      |  |  |  |  |
|    |   |            |                                           |     |                                                                                      |    | <a href="#">561</a> | <a href="#">569</a> | <a href="#">74</a>                  |     |                                                                                      |  |  |  |  |
|    |   |            |                                           |     |                                                                                      |    | <a href="#">310</a> | <a href="#">330</a> | <a href="#">72</a>                  |     |                                                                                      |  |  |  |  |
|    |   |            |                                           |     |                                                                                      |    | <a href="#">86</a>  | <a href="#">98</a>  | <a href="#">72</a>                  |     |                                                                                      |  |  |  |  |
|    |   |            |                                           |     |                                                                                      |    | <a href="#">316</a> | <a href="#">328</a> | <a href="#">72</a>                  |     |                                                                                      |  |  |  |  |
|    |   |            |                                           |     |                                                                                      |    | <a href="#">459</a> | <a href="#">472</a> | <a href="#">39</a>                  |     |                                                                                      |  |  |  |  |
|    |   |            |                                           |     |                                                                                      |    | <a href="#">84</a>  | <a href="#">108</a> | <a href="#">5</a>                   |     |                                                                                      |  |  |  |  |
|    |   |            |                                           |     |                                                                                      |    | <a href="#">454</a> | <a href="#">476</a> | <a href="#">39</a>                  |     |                                                                                      |  |  |  |  |
|    |   |            |                                           |     |                                                                                      | 67 | Not clustered       | PVX_241290          | variable surface protein Vir12-like | 771 |  |  |  |  |  |

|                     |                     |                    |                                        |     |                                                                                      |                     |                     |                    |
|---------------------|---------------------|--------------------|----------------------------------------|-----|--------------------------------------------------------------------------------------|---------------------|---------------------|--------------------|
|                     |                     |                    |                                        |     |                                                                                      | <a href="#">17</a>  | <a href="#">43</a>  | <a href="#">17</a> |
|                     |                     |                    |                                        |     |                                                                                      | <a href="#">197</a> | <a href="#">212</a> | <a href="#">23</a> |
|                     |                     |                    |                                        |     |                                                                                      | <a href="#">232</a> | <a href="#">251</a> | <a href="#">28</a> |
|                     |                     |                    |                                        |     |                                                                                      | <a href="#">269</a> | <a href="#">281</a> | <a href="#">72</a> |
|                     |                     |                    |                                        |     |                                                                                      | <a href="#">199</a> | <a href="#">211</a> | <a href="#">23</a> |
|                     |                     |                    |                                        |     |                                                                                      | <a href="#">241</a> | <a href="#">282</a> | <a href="#">72</a> |
|                     |                     |                    |                                        |     |                                                                                      | <a href="#">56</a>  | <a href="#">71</a>  | <a href="#">10</a> |
|                     |                     |                    |                                        |     |                                                                                      | <a href="#">265</a> | <a href="#">280</a> | <a href="#">72</a> |
|                     |                     |                    |                                        |     |                                                                                      | <a href="#">266</a> | <a href="#">281</a> | <a href="#">72</a> |
|                     |                     |                    |                                        |     |                                                                                      | <a href="#">485</a> | <a href="#">506</a> | <a href="#">40</a> |
| 68                  | Not clustered       | PVX_086855         | variable surface protein Vir24-like    | 721 |    | <a href="#">174</a> | <a href="#">187</a> | <a href="#">40</a> |
|                     |                     |                    |                                        |     |                                                                                      | <a href="#">468</a> | <a href="#">488</a> | <a href="#">40</a> |
|                     |                     |                    |                                        |     |                                                                                      | <a href="#">201</a> | <a href="#">226</a> | <a href="#">5</a>  |
|                     |                     |                    |                                        |     |                                                                                      | <a href="#">434</a> | <a href="#">456</a> | <a href="#">39</a> |
|                     |                     |                    |                                        |     |                                                                                      | <a href="#">301</a> | <a href="#">319</a> | <a href="#">28</a> |
|                     |                     |                    |                                        |     |                                                                                      | <a href="#">143</a> | <a href="#">165</a> | <a href="#">17</a> |
|                     |                     |                    |                                        |     |                                                                                      | <a href="#">272</a> | <a href="#">282</a> | <a href="#">23</a> |
|                     |                     |                    |                                        |     |                                                                                      | <a href="#">300</a> | <a href="#">316</a> | <a href="#">28</a> |
|                     |                     |                    |                                        |     |                                                                                      | <a href="#">657</a> | <a href="#">678</a> | <a href="#">74</a> |
|                     |                     |                    |                                        |     |                                                                                      | <a href="#">307</a> | <a href="#">358</a> | <a href="#">72</a> |
|                     |                     |                    |                                        |     |                                                                                      | <a href="#">292</a> | <a href="#">322</a> | <a href="#">21</a> |
|                     |                     |                    |                                        |     |                                                                                      | <a href="#">174</a> | <a href="#">189</a> | <a href="#">10</a> |
|                     |                     |                    |                                        |     |                                                                                      | <a href="#">88</a>  | <a href="#">99</a>  | <a href="#">72</a> |
|                     |                     |                    |                                        |     |                                                                                      | <a href="#">331</a> | <a href="#">346</a> | <a href="#">72</a> |
|                     |                     |                    |                                        |     |                                                                                      | <a href="#">467</a> | <a href="#">488</a> | <a href="#">40</a> |
| 69                  | C                   | PVX_101565         | variable surface protein Vir24-related | 473 |  | <a href="#">176</a> | <a href="#">195</a> | <a href="#">40</a> |
|                     |                     |                    |                                        |     |                                                                                      | <a href="#">57</a>  | <a href="#">74</a>  | <a href="#">28</a> |
|                     |                     |                    |                                        |     |                                                                                      | <a href="#">16</a>  | <a href="#">33</a>  | <a href="#">23</a> |
|                     |                     |                    |                                        |     |                                                                                      | <a href="#">18</a>  | <a href="#">27</a>  | <a href="#">23</a> |
|                     |                     |                    |                                        |     |                                                                                      | <a href="#">171</a> | <a href="#">194</a> | <a href="#">40</a> |
| 70                  | E                   | PVX_086860         | variable surface protein Vir24-related | 447 |  | <a href="#">176</a> | <a href="#">195</a> | <a href="#">40</a> |
|                     |                     |                    |                                        |     |                                                                                      | <a href="#">136</a> | <a href="#">154</a> | <a href="#">39</a> |
|                     |                     |                    |                                        |     |                                                                                      | <a href="#">78</a>  | <a href="#">98</a>  | <a href="#">72</a> |
|                     |                     |                    |                                        |     |                                                                                      | <a href="#">8</a>   | <a href="#">23</a>  | <a href="#">23</a> |
|                     |                     |                    |                                        |     |                                                                                      | <a href="#">56</a>  | <a href="#">64</a>  | <a href="#">28</a> |
|                     |                     |                    |                                        |     |                                                                                      | <a href="#">116</a> | <a href="#">153</a> | <a href="#">39</a> |
|                     |                     |                    |                                        |     |                                                                                      | <a href="#">142</a> | <a href="#">152</a> | <a href="#">39</a> |
|                     |                     |                    |                                        |     |                                                                                      | <a href="#">10</a>  | <a href="#">21</a>  | <a href="#">23</a> |
|                     |                     |                    |                                        |     |                                                                                      | <a href="#">191</a> | <a href="#">213</a> | <a href="#">46</a> |
|                     |                     |                    |                                        |     |                                                                                      | <a href="#">56</a>  | <a href="#">116</a> | <a href="#">72</a> |
| <a href="#">52</a>  | <a href="#">64</a>  | <a href="#">28</a> |                                        |     |                                                                                      |                     |                     |                    |
| <a href="#">233</a> | <a href="#">309</a> | <a href="#">6</a>  |                                        |     |                                                                                      |                     |                     |                    |
| <a href="#">77</a>  | <a href="#">91</a>  | <a href="#">72</a> |                                        |     |                                                                                      |                     |                     |                    |
| <a href="#">433</a> | <a href="#">445</a> | <a href="#">13</a> |                                        |     |                                                                                      |                     |                     |                    |
| <a href="#">75</a>  | <a href="#">91</a>  | <a href="#">72</a> |                                        |     |                                                                                      |                     |                     |                    |



|    |               |            |                                           |     |                                                                                      |                     |                     |                    |
|----|---------------|------------|-------------------------------------------|-----|--------------------------------------------------------------------------------------|---------------------|---------------------|--------------------|
| 71 | E             | PVX_083575 | variable surface protein Vir24-related    | 510 |    | <a href="#">7</a>   | <a href="#">17</a>  | <a href="#">23</a> |
|    |               |            |                                           |     |                                                                                      | <a href="#">98</a>  | <a href="#">148</a> | <a href="#">39</a> |
|    |               |            |                                           |     |                                                                                      | <a href="#">138</a> | <a href="#">148</a> | <a href="#">39</a> |
|    |               |            |                                           |     |                                                                                      | <a href="#">10</a>  | <a href="#">23</a>  | <a href="#">23</a> |
|    |               |            |                                           |     |                                                                                      | <a href="#">51</a>  | <a href="#">96</a>  | <a href="#">72</a> |
|    |               |            |                                           |     |                                                                                      | <a href="#">47</a>  | <a href="#">59</a>  | <a href="#">28</a> |
|    |               |            |                                           |     |                                                                                      | <a href="#">234</a> | <a href="#">310</a> | <a href="#">6</a>  |
| 72 | E             | PVX_097530 | variable surface protein Vir22/12-related | 524 |    | <a href="#">31</a>  | <a href="#">47</a>  | <a href="#">23</a> |
|    |               |            |                                           |     |                                                                                      | <a href="#">33</a>  | <a href="#">61</a>  | <a href="#">23</a> |
|    |               |            |                                           |     |                                                                                      | <a href="#">155</a> | <a href="#">165</a> | <a href="#">39</a> |
|    |               |            |                                           |     |                                                                                      | <a href="#">155</a> | <a href="#">166</a> | <a href="#">39</a> |
|    |               |            |                                           |     |                                                                                      | <a href="#">69</a>  | <a href="#">132</a> | <a href="#">72</a> |
|    |               |            |                                           |     |                                                                                      | <a href="#">251</a> | <a href="#">287</a> | <a href="#">6</a>  |
|    |               |            |                                           |     |                                                                                      | <a href="#">200</a> | <a href="#">220</a> | <a href="#">46</a> |
| 73 | E             | PVX_097555 | variable surface protein Vir12/16-related | 516 |    | <a href="#">44</a>  | <a href="#">58</a>  | <a href="#">28</a> |
|    |               |            |                                           |     |                                                                                      | <a href="#">11</a>  | <a href="#">26</a>  | <a href="#">23</a> |
|    |               |            |                                           |     |                                                                                      | <a href="#">47</a>  | <a href="#">58</a>  | <a href="#">28</a> |
|    |               |            |                                           |     |                                                                                      | <a href="#">138</a> | <a href="#">148</a> | <a href="#">39</a> |
|    |               |            |                                           |     |                                                                                      | <a href="#">60</a>  | <a href="#">115</a> | <a href="#">72</a> |
|    |               |            |                                           |     |                                                                                      | <a href="#">50</a>  | <a href="#">115</a> | <a href="#">72</a> |
|    |               |            |                                           |     |                                                                                      | <a href="#">234</a> | <a href="#">268</a> | <a href="#">6</a>  |
| 74 | E             | PVX_124715 | variable surface protein Vir5-related     | 528 |  | <a href="#">398</a> | <a href="#">420</a> | <a href="#">40</a> |
|    |               |            |                                           |     |                                                                                      | <a href="#">188</a> | <a href="#">283</a> | <a href="#">7</a>  |
|    |               |            |                                           |     |                                                                                      | <a href="#">82</a>  | <a href="#">93</a>  | <a href="#">72</a> |
|    |               |            |                                           |     |                                                                                      | <a href="#">348</a> | <a href="#">393</a> | <a href="#">39</a> |
|    |               |            |                                           |     |                                                                                      | <a href="#">375</a> | <a href="#">385</a> | <a href="#">39</a> |
|    |               |            |                                           |     |                                                                                      | <a href="#">429</a> | <a href="#">444</a> | <a href="#">46</a> |
|    |               |            |                                           |     |                                                                                      | <a href="#">427</a> | <a href="#">450</a> | <a href="#">46</a> |
| 75 |               | PVX_125726 | hypothetical protein                      | 364 |  | <a href="#">91</a>  | <a href="#">114</a> | <a href="#">40</a> |
|    |               |            |                                           |     |                                                                                      | <a href="#">59</a>  | <a href="#">79</a>  | <a href="#">39</a> |
|    |               |            |                                           |     |                                                                                      | <a href="#">68</a>  | <a href="#">78</a>  | <a href="#">39</a> |
|    |               |            |                                           |     |                                                                                      | <a href="#">113</a> | <a href="#">135</a> | <a href="#">46</a> |
|    |               |            |                                           |     |                                                                                      | <a href="#">117</a> | <a href="#">136</a> | <a href="#">46</a> |
|    |               |            |                                           |     |                                                                                      | <a href="#">34</a>  | <a href="#">55</a>  | <a href="#">6</a>  |
|    |               |            |                                           |     |                                                                                      | <a href="#">175</a> | <a href="#">195</a> | <a href="#">40</a> |
| 76 | Not clustered | PVX_088780 | variable surface protein Vir24-related    | 446 |  | <a href="#">149</a> | <a href="#">161</a> | <a href="#">39</a> |
|    |               |            |                                           |     |                                                                                      | <a href="#">53</a>  | <a href="#">71</a>  | <a href="#">28</a> |
|    |               |            |                                           |     |                                                                                      | <a href="#">151</a> | <a href="#">161</a> | <a href="#">39</a> |
|    |               |            |                                           |     |                                                                                      | <a href="#">201</a> | <a href="#">223</a> | <a href="#">46</a> |
|    |               |            |                                           |     |                                                                                      | <a href="#">59</a>  | <a href="#">123</a> | <a href="#">72</a> |
|    |               |            |                                           |     |                                                                                      | <a href="#">166</a> | <a href="#">188</a> | <a href="#">40</a> |
|    |               |            |                                           |     |                                                                                      | <a href="#">141</a> | <a href="#">154</a> | <a href="#">39</a> |
| 77 | Not clustered | PVX_112720 | variable surface protein Vir12-related    | 505 |  | <a href="#">134</a> | <a href="#">156</a> | <a href="#">39</a> |
|    |               |            |                                           |     |                                                                                      | <a href="#">134</a> | <a href="#">156</a> | <a href="#">39</a> |

|    |   |            |                                          |     |                                                                                      |                     |                     |                    |
|----|---|------------|------------------------------------------|-----|--------------------------------------------------------------------------------------|---------------------|---------------------|--------------------|
|    |   |            |                                          |     |                                                                                      | <a href="#">51</a>  | <a href="#">64</a>  | <a href="#">28</a> |
|    |   |            |                                          |     |                                                                                      | <a href="#">143</a> | <a href="#">153</a> | <a href="#">39</a> |
|    |   |            |                                          |     |                                                                                      | <a href="#">196</a> | <a href="#">212</a> | <a href="#">46</a> |
|    |   |            |                                          |     |                                                                                      | <a href="#">195</a> | <a href="#">215</a> | <a href="#">46</a> |
|    |   |            |                                          |     |                                                                                      | <a href="#">51</a>  | <a href="#">109</a> | <a href="#">72</a> |
|    |   |            |                                          |     |                                                                                      | <a href="#">74</a>  | <a href="#">85</a>  | <a href="#">72</a> |
|    |   |            |                                          |     |                                                                                      | <a href="#">175</a> | <a href="#">191</a> | <a href="#">40</a> |
|    |   |            |                                          |     |                                                                                      | <a href="#">146</a> | <a href="#">161</a> | <a href="#">39</a> |
| 78 | E | PVX_106725 | variable surface protein Vir12, putative | 469 |    | <a href="#">57</a>  | <a href="#">68</a>  | <a href="#">28</a> |
|    |   |            |                                          |     |                                                                                      | <a href="#">202</a> | <a href="#">225</a> | <a href="#">33</a> |
|    |   |            |                                          |     |                                                                                      | <a href="#">202</a> | <a href="#">223</a> | <a href="#">46</a> |
|    |   |            |                                          |     |                                                                                      | <a href="#">80</a>  | <a href="#">91</a>  | <a href="#">72</a> |
|    |   |            |                                          |     |                                                                                      | <a href="#">29</a>  | <a href="#">50</a>  | <a href="#">40</a> |
|    |   |            |                                          |     |                                                                                      | <a href="#">2</a>   | <a href="#">15</a>  | <a href="#">39</a> |
|    |   |            |                                          |     |                                                                                      | <a href="#">4</a>   | <a href="#">14</a>  | <a href="#">39</a> |
|    |   |            |                                          |     |                                                                                      | <a href="#">4</a>   | <a href="#">15</a>  | <a href="#">39</a> |
| 79 |   | PVX_124725 | hypothetical protein                     | 220 |    | <a href="#">58</a>  | <a href="#">81</a>  | <a href="#">46</a> |
|    |   |            |                                          |     |                                                                                      | <a href="#">29</a>  | <a href="#">46</a>  | <a href="#">40</a> |
|    |   |            |                                          |     |                                                                                      | <a href="#">162</a> | <a href="#">184</a> | <a href="#">13</a> |
|    |   |            |                                          |     |                                                                                      | <a href="#">29</a>  | <a href="#">47</a>  | <a href="#">40</a> |
|    |   |            |                                          |     |                                                                                      | <a href="#">123</a> | <a href="#">146</a> | <a href="#">40</a> |
|    |   |            |                                          |     |                                                                                      | <a href="#">35</a>  | <a href="#">52</a>  | <a href="#">72</a> |
|    |   |            |                                          |     |                                                                                      | <a href="#">261</a> | <a href="#">270</a> | <a href="#">15</a> |
|    |   |            |                                          |     |                                                                                      | <a href="#">152</a> | <a href="#">170</a> | <a href="#">46</a> |
|    |   |            |                                          |     |                                                                                      | <a href="#">153</a> | <a href="#">176</a> | <a href="#">46</a> |
|    |   |            |                                          |     |                                                                                      | <a href="#">15</a>  | <a href="#">54</a>  | <a href="#">72</a> |
|    |   |            |                                          |     |                                                                                      | <a href="#">3</a>   | <a href="#">22</a>  | <a href="#">28</a> |
|    |   |            |                                          |     |                                                                                      | <a href="#">240</a> | <a href="#">261</a> | <a href="#">13</a> |
|    |   |            |                                          |     |                                                                                      | <a href="#">174</a> | <a href="#">194</a> | <a href="#">40</a> |
|    |   |            |                                          |     |                                                                                      | <a href="#">424</a> | <a href="#">437</a> | <a href="#">74</a> |
|    |   |            |                                          |     |                                                                                      | <a href="#">424</a> | <a href="#">437</a> | <a href="#">74</a> |
|    |   |            |                                          |     |                                                                                      | <a href="#">150</a> | <a href="#">160</a> | <a href="#">39</a> |
|    |   |            |                                          |     |                                                                                      | <a href="#">199</a> | <a href="#">215</a> | <a href="#">46</a> |
|    |   |            |                                          |     |                                                                                      | <a href="#">16</a>  | <a href="#">27</a>  | <a href="#">23</a> |
|    |   |            |                                          |     |                                                                                      | <a href="#">199</a> | <a href="#">220</a> | <a href="#">46</a> |
|    |   |            |                                          |     |                                                                                      | <a href="#">61</a>  | <a href="#">120</a> | <a href="#">72</a> |
|    |   |            |                                          |     |                                                                                      | <a href="#">199</a> | <a href="#">222</a> | <a href="#">46</a> |
|    |   |            |                                          |     |                                                                                      | <a href="#">174</a> | <a href="#">186</a> | <a href="#">10</a> |
|    |   |            |                                          |     |                                                                                      | <a href="#">199</a> | <a href="#">222</a> | <a href="#">46</a> |
|    |   |            |                                          |     |                                                                                      | <a href="#">172</a> | <a href="#">191</a> | <a href="#">40</a> |
|    |   |            |                                          |     |                                                                                      | <a href="#">83</a>  | <a href="#">96</a>  | <a href="#">72</a> |
|    |   |            |                                          |     |                                                                                      | <a href="#">84</a>  | <a href="#">100</a> | <a href="#">72</a> |
|    |   |            |                                          |     |                                                                                      | <a href="#">85</a>  | <a href="#">96</a>  | <a href="#">72</a> |
|    |   |            |                                          |     |                                                                                      | <a href="#">176</a> | <a href="#">194</a> | <a href="#">40</a> |
| 81 | E | PVX_003510 | variable surface protein Vir24-related   | 453 |  | <a href="#">157</a> | <a href="#">177</a> | <a href="#">40</a> |
| 82 | E | PVX_104190 | variable surface                         | 426 |  |                     |                     |                    |

|    |             |            |                                        |     |  |                     |                     |                    |
|----|-------------|------------|----------------------------------------|-----|--|---------------------|---------------------|--------------------|
|    |             |            |                                        |     |  | <a href="#">364</a> | <a href="#">381</a> | <a href="#">74</a> |
|    |             |            |                                        |     |  | <a href="#">363</a> | <a href="#">381</a> | <a href="#">74</a> |
|    |             |            |                                        |     |  | <a href="#">42</a>  | <a href="#">61</a>  | <a href="#">28</a> |
|    |             |            |                                        |     |  | <a href="#">135</a> | <a href="#">145</a> | <a href="#">39</a> |
|    |             |            |                                        |     |  | <a href="#">12</a>  | <a href="#">28</a>  | <a href="#">23</a> |
|    |             |            |                                        |     |  | <a href="#">185</a> | <a href="#">202</a> | <a href="#">46</a> |
|    |             |            |                                        |     |  | <a href="#">51</a>  | <a href="#">111</a> | <a href="#">72</a> |
|    |             |            |                                        |     |  | <a href="#">372</a> | <a href="#">384</a> | <a href="#">74</a> |
|    |             |            |                                        |     |  | <a href="#">186</a> | <a href="#">202</a> | <a href="#">46</a> |
|    |             |            |                                        |     |  | <a href="#">74</a>  | <a href="#">88</a>  | <a href="#">72</a> |
|    |             |            |                                        |     |  | <a href="#">158</a> | <a href="#">177</a> | <a href="#">40</a> |
|    |             |            |                                        |     |  | <a href="#">423</a> | <a href="#">445</a> | <a href="#">40</a> |
|    |             |            |                                        |     |  | <a href="#">130</a> | <a href="#">164</a> | <a href="#">17</a> |
|    |             |            |                                        |     |  | <a href="#">265</a> | <a href="#">278</a> | <a href="#">23</a> |
|    |             |            |                                        |     |  | <a href="#">359</a> | <a href="#">412</a> | <a href="#">39</a> |
|    |             |            |                                        |     |  | <a href="#">399</a> | <a href="#">409</a> | <a href="#">39</a> |
|    |             |            |                                        |     |  | <a href="#">452</a> | <a href="#">479</a> | <a href="#">33</a> |
|    |             |            |                                        |     |  | <a href="#">266</a> | <a href="#">283</a> | <a href="#">23</a> |
|    |             |            |                                        |     |  | <a href="#">452</a> | <a href="#">475</a> | <a href="#">46</a> |
|    |             |            |                                        |     |  | <a href="#">422</a> | <a href="#">441</a> | <a href="#">40</a> |
|    |             |            |                                        |     |  | <a href="#">524</a> | <a href="#">541</a> | <a href="#">13</a> |
|    |             |            |                                        |     |  | <a href="#">458</a> | <a href="#">474</a> | <a href="#">46</a> |
|    |             |            |                                        |     |  | <a href="#">83</a>  | <a href="#">96</a>  | <a href="#">72</a> |
|    |             |            |                                        |     |  | <a href="#">332</a> | <a href="#">350</a> | <a href="#">72</a> |
|    |             |            |                                        |     |  | <a href="#">335</a> | <a href="#">344</a> | <a href="#">72</a> |
|    |             |            |                                        |     |  | <a href="#">472</a> | <a href="#">494</a> | <a href="#">40</a> |
|    |             |            |                                        |     |  | <a href="#">354</a> | <a href="#">381</a> | <a href="#">28</a> |
|    |             |            |                                        |     |  | <a href="#">131</a> | <a href="#">164</a> | <a href="#">17</a> |
|    |             |            |                                        |     |  | <a href="#">512</a> | <a href="#">533</a> | <a href="#">46</a> |
|    |             |            |                                        |     |  | <a href="#">515</a> | <a href="#">536</a> | <a href="#">46</a> |
|    |             |            |                                        |     |  | <a href="#">169</a> | <a href="#">184</a> | <a href="#">10</a> |
|    |             |            |                                        |     |  | <a href="#">472</a> | <a href="#">490</a> | <a href="#">40</a> |
|    |             |            |                                        |     |  | <a href="#">622</a> | <a href="#">637</a> | <a href="#">13</a> |
|    |             |            |                                        |     |  | <a href="#">517</a> | <a href="#">533</a> | <a href="#">46</a> |
|    |             |            |                                        |     |  | <a href="#">384</a> | <a href="#">396</a> | <a href="#">72</a> |
|    |             |            |                                        |     |  | <a href="#">384</a> | <a href="#">394</a> | <a href="#">72</a> |
|    |             |            |                                        |     |  | <a href="#">472</a> | <a href="#">491</a> | <a href="#">40</a> |
|    |             |            |                                        |     |  | <a href="#">326</a> | <a href="#">347</a> | <a href="#">40</a> |
|    |             |            |                                        |     |  | <a href="#">81</a>  | <a href="#">103</a> | <a href="#">17</a> |
|    |             |            |                                        |     |  | <a href="#">168</a> | <a href="#">184</a> | <a href="#">23</a> |
|    |             |            |                                        |     |  | <a href="#">266</a> | <a href="#">300</a> | <a href="#">13</a> |
|    |             |            |                                        |     |  | <a href="#">447</a> | <a href="#">463</a> | <a href="#">13</a> |
|    |             |            |                                        |     |  | <a href="#">301</a> | <a href="#">311</a> | <a href="#">39</a> |
|    |             |            |                                        |     |  | <a href="#">354</a> | <a href="#">375</a> | <a href="#">46</a> |
|    |             |            |                                        |     |  | <a href="#">170</a> | <a href="#">182</a> | <a href="#">23</a> |
| 83 |             | PVX_090295 | hypothetical protein                   | 542 |  |                     |                     |                    |
| 84 | E           | PVX_097540 | variable surface protein Vir24-related | 668 |  |                     |                     |                    |
| 85 | Unavailable | PVX_096910 | variable surface protein Vir23-related | 506 |  |                     |                     |                    |

|    |   |            |                                           |     |                                                                                      |                     |                     |                     |                    |
|----|---|------------|-------------------------------------------|-----|--------------------------------------------------------------------------------------|---------------------|---------------------|---------------------|--------------------|
|    |   |            |                                           |     |                                                                                      |                     | <a href="#">355</a> | <a href="#">378</a> | <a href="#">46</a> |
|    |   |            |                                           |     |                                                                                      |                     | <a href="#">196</a> | <a href="#">222</a> | <a href="#">28</a> |
|    |   |            |                                           |     |                                                                                      |                     | <a href="#">26</a>  | <a href="#">33</a>  | <a href="#">72</a> |
|    |   |            |                                           |     |                                                                                      |                     | <a href="#">233</a> | <a href="#">248</a> | <a href="#">72</a> |
|    |   |            |                                           |     |                                                                                      |                     | <a href="#">359</a> | <a href="#">376</a> | <a href="#">46</a> |
|    |   |            |                                           |     |                                                                                      |                     | <a href="#">231</a> | <a href="#">248</a> | <a href="#">72</a> |
|    |   |            |                                           |     |                                                                                      |                     | <a href="#">326</a> | <a href="#">344</a> | <a href="#">40</a> |
|    |   |            |                                           |     |                                                                                      |                     | <a href="#">166</a> | <a href="#">189</a> | <a href="#">40</a> |
|    |   |            |                                           |     |                                                                                      |                     | <a href="#">7</a>   | <a href="#">39</a>  | <a href="#">7</a>  |
|    |   |            |                                           |     |                                                                                      |                     | <a href="#">104</a> | <a href="#">142</a> | <a href="#">13</a> |
|    |   |            |                                           |     |                                                                                      |                     | <a href="#">286</a> | <a href="#">300</a> | <a href="#">13</a> |
|    |   |            |                                           |     |                                                                                      |                     | <a href="#">143</a> | <a href="#">153</a> | <a href="#">39</a> |
|    |   |            |                                           |     |                                                                                      |                     | <a href="#">143</a> | <a href="#">154</a> | <a href="#">39</a> |
|    |   |            |                                           |     |                                                                                      |                     | <a href="#">196</a> | <a href="#">219</a> | <a href="#">46</a> |
|    |   |            |                                           |     |                                                                                      |                     | <a href="#">40</a>  | <a href="#">66</a>  | <a href="#">28</a> |
|    |   |            |                                           |     |                                                                                      |                     | <a href="#">200</a> | <a href="#">214</a> | <a href="#">46</a> |
|    |   |            |                                           |     |                                                                                      |                     | <a href="#">74</a>  | <a href="#">92</a>  | <a href="#">72</a> |
|    |   |            |                                           |     |                                                                                      |                     | <a href="#">441</a> | <a href="#">461</a> | <a href="#">40</a> |
|    |   |            |                                           |     |                                                                                      |                     | <a href="#">233</a> | <a href="#">326</a> | <a href="#">7</a>  |
|    |   |            |                                           |     |                                                                                      |                     | <a href="#">162</a> | <a href="#">223</a> | <a href="#">40</a> |
|    |   |            |                                           |     |                                                                                      |                     | <a href="#">165</a> | <a href="#">220</a> | <a href="#">40</a> |
|    |   |            |                                           |     |                                                                                      |                     | <a href="#">474</a> | <a href="#">492</a> | <a href="#">46</a> |
|    |   |            |                                           |     |                                                                                      |                     | <a href="#">472</a> | <a href="#">495</a> | <a href="#">46</a> |
|    |   |            |                                           |     |                                                                                      |                     | <a href="#">328</a> | <a href="#">392</a> | <a href="#">72</a> |
|    |   |            |                                           |     |                                                                                      |                     | <a href="#">439</a> | <a href="#">459</a> | <a href="#">40</a> |
|    |   |            |                                           |     |                                                                                      |                     | <a href="#">351</a> | <a href="#">364</a> | <a href="#">72</a> |
|    |   |            |                                           |     |                                                                                      |                     | <a href="#">477</a> | <a href="#">494</a> | <a href="#">46</a> |
|    |   |            |                                           |     |                                                                                      |                     | <a href="#">441</a> | <a href="#">460</a> | <a href="#">40</a> |
|    |   |            |                                           |     |                                                                                      |                     | <a href="#">292</a> | <a href="#">312</a> | <a href="#">40</a> |
|    |   |            |                                           |     |                                                                                      |                     | <a href="#">203</a> | <a href="#">217</a> | <a href="#">72</a> |
|    |   |            |                                           |     |                                                                                      |                     | <a href="#">230</a> | <a href="#">265</a> | <a href="#">13</a> |
|    |   |            |                                           |     |                                                                                      |                     | <a href="#">44</a>  | <a href="#">137</a> | <a href="#">40</a> |
|    |   |            |                                           |     |                                                                                      |                     | <a href="#">57</a>  | <a href="#">105</a> | <a href="#">40</a> |
|    |   |            |                                           |     |                                                                                      |                     | <a href="#">252</a> | <a href="#">308</a> | <a href="#">40</a> |
|    |   |            |                                           |     |                                                                                      |                     | <a href="#">59</a>  | <a href="#">80</a>  | <a href="#">40</a> |
|    |   |            |                                           |     |                                                                                      |                     | <a href="#">267</a> | <a href="#">278</a> | <a href="#">39</a> |
|    |   |            |                                           |     |                                                                                      |                     | <a href="#">322</a> | <a href="#">345</a> | <a href="#">46</a> |
|    |   |            |                                           |     |                                                                                      |                     | <a href="#">179</a> | <a href="#">218</a> | <a href="#">72</a> |
|    |   |            |                                           |     |                                                                                      |                     | <a href="#">292</a> | <a href="#">308</a> | <a href="#">40</a> |
|    |   |            |                                           |     |                                                                                      |                     | <a href="#">171</a> | <a href="#">187</a> | <a href="#">28</a> |
|    |   |            |                                           |     |                                                                                      |                     | <a href="#">203</a> | <a href="#">216</a> | <a href="#">72</a> |
|    |   |            |                                           |     |                                                                                      |                     | <a href="#">327</a> | <a href="#">342</a> | <a href="#">46</a> |
|    |   |            |                                           |     |                                                                                      |                     | <a href="#">200</a> | <a href="#">216</a> | <a href="#">72</a> |
|    |   |            |                                           |     |                                                                                      |                     | <a href="#">292</a> | <a href="#">308</a> | <a href="#">40</a> |
| 86 | E | PVX_115485 | variable surface protein Vir24-related    | 302 |    | <a href="#">410</a> | <a href="#">432</a> | <a href="#">40</a>  |                    |
| 87 | E | PVX_107755 | variable surface protein Vir12/24-related | 657 |  |                     |                     |                     |                    |
| 88 | E | PVX_003505 | variable surface protein Vir24-related    | 414 |  |                     |                     |                     |                    |
| 89 | E | PVX_119210 | variant surface                           | 540 |  |                     |                     |                     |                    |

|    |            |                      |     |  |                     |                     |                     |                    |
|----|------------|----------------------|-----|--|---------------------|---------------------|---------------------|--------------------|
|    |            |                      |     |  |                     | <a href="#">180</a> | <a href="#">227</a> | <a href="#">7</a>  |
|    |            |                      |     |  |                     | <a href="#">229</a> | <a href="#">289</a> | <a href="#">7</a>  |
|    |            |                      |     |  |                     | <a href="#">115</a> | <a href="#">211</a> | <a href="#">40</a> |
|    |            |                      |     |  |                     | <a href="#">77</a>  | <a href="#">88</a>  | <a href="#">72</a> |
|    |            |                      |     |  |                     | <a href="#">515</a> | <a href="#">530</a> | <a href="#">13</a> |
|    |            |                      |     |  |                     | <a href="#">123</a> | <a href="#">173</a> | <a href="#">40</a> |
|    |            |                      |     |  |                     | <a href="#">390</a> | <a href="#">400</a> | <a href="#">39</a> |
|    |            |                      |     |  |                     | <a href="#">441</a> | <a href="#">464</a> | <a href="#">46</a> |
|    |            |                      |     |  |                     | <a href="#">300</a> | <a href="#">363</a> | <a href="#">72</a> |
|    |            |                      |     |  |                     | <a href="#">405</a> | <a href="#">428</a> | <a href="#">40</a> |
|    |            |                      |     |  |                     | <a href="#">322</a> | <a href="#">335</a> | <a href="#">72</a> |
|    |            |                      |     |  |                     | <a href="#">322</a> | <a href="#">339</a> | <a href="#">72</a> |
|    |            |                      |     |  |                     | <a href="#">324</a> | <a href="#">335</a> | <a href="#">72</a> |
| 90 | PVX_094250 | hypothetical protein | 525 |  | <a href="#">397</a> | <a href="#">420</a> | <a href="#">40</a>  |                    |
|    |            |                      |     |  | <a href="#">234</a> | <a href="#">274</a> | <a href="#">7</a>   |                    |
|    |            |                      |     |  | <a href="#">98</a>  | <a href="#">194</a> | <a href="#">40</a>  |                    |
|    |            |                      |     |  | <a href="#">63</a>  | <a href="#">73</a>  | <a href="#">72</a>  |                    |
|    |            |                      |     |  | <a href="#">504</a> | <a href="#">517</a> | <a href="#">13</a>  |                    |
|    |            |                      |     |  | <a href="#">430</a> | <a href="#">452</a> | <a href="#">46</a>  |                    |
|    |            |                      |     |  | <a href="#">283</a> | <a href="#">347</a> | <a href="#">72</a>  |                    |
|    |            |                      |     |  | <a href="#">395</a> | <a href="#">416</a> | <a href="#">40</a>  |                    |
|    |            |                      |     |  | <a href="#">306</a> | <a href="#">319</a> | <a href="#">72</a>  |                    |
|    |            |                      |     |  | <a href="#">306</a> | <a href="#">319</a> | <a href="#">72</a>  |                    |
|    |            |                      |     |  | <a href="#">308</a> | <a href="#">319</a> | <a href="#">72</a>  |                    |
| 91 | PVX_086865 | hypothetical protein | 576 |  | <a href="#">468</a> | <a href="#">490</a> | <a href="#">40</a>  |                    |
|    |            |                      |     |  | <a href="#">433</a> | <a href="#">453</a> | <a href="#">39</a>  |                    |
|    |            |                      |     |  | <a href="#">291</a> | <a href="#">351</a> | <a href="#">7</a>   |                    |
|    |            |                      |     |  | <a href="#">308</a> | <a href="#">324</a> | <a href="#">23</a>  |                    |
|    |            |                      |     |  | <a href="#">136</a> | <a href="#">145</a> | <a href="#">72</a>  |                    |
|    |            |                      |     |  | <a href="#">443</a> | <a href="#">453</a> | <a href="#">39</a>  |                    |
|    |            |                      |     |  | <a href="#">135</a> | <a href="#">150</a> | <a href="#">72</a>  |                    |
|    |            |                      |     |  | <a href="#">499</a> | <a href="#">517</a> | <a href="#">46</a>  |                    |
|    |            |                      |     |  | <a href="#">353</a> | <a href="#">418</a> | <a href="#">72</a>  |                    |
|    |            |                      |     |  | <a href="#">465</a> | <a href="#">486</a> | <a href="#">40</a>  |                    |
|    |            |                      |     |  | <a href="#">376</a> | <a href="#">389</a> | <a href="#">72</a>  |                    |
|    |            |                      |     |  | <a href="#">377</a> | <a href="#">393</a> | <a href="#">72</a>  |                    |
|    |            |                      |     |  | <a href="#">378</a> | <a href="#">390</a> | <a href="#">72</a>  |                    |
| 92 | PVX_097542 | hypothetical protein | 560 |  | <a href="#">396</a> | <a href="#">418</a> | <a href="#">40</a>  |                    |
|    |            |                      |     |  | <a href="#">167</a> | <a href="#">278</a> | <a href="#">7</a>   |                    |
|    |            |                      |     |  | <a href="#">373</a> | <a href="#">382</a> | <a href="#">39</a>  |                    |
|    |            |                      |     |  | <a href="#">428</a> | <a href="#">450</a> | <a href="#">46</a>  |                    |
|    |            |                      |     |  | <a href="#">392</a> | <a href="#">414</a> | <a href="#">40</a>  |                    |
|    |            |                      |     |  | <a href="#">305</a> | <a href="#">317</a> | <a href="#">72</a>  |                    |
|    |            |                      |     |  | <a href="#">303</a> | <a href="#">322</a> | <a href="#">72</a>  |                    |
| 93 | PVX_086895 | hypothetical         | 553 |  | <a href="#">432</a> | <a href="#">453</a> | <a href="#">40</a>  |                    |

|    |               |            |                                        |     |                                                                                      |                     |                     |                    |
|----|---------------|------------|----------------------------------------|-----|--------------------------------------------------------------------------------------|---------------------|---------------------|--------------------|
|    |               |            |                                        |     |                                                                                      | <a href="#">129</a> | <a href="#">234</a> | <a href="#">40</a> |
|    |               |            |                                        |     |                                                                                      | <a href="#">339</a> | <a href="#">355</a> | <a href="#">72</a> |
|    |               |            |                                        |     |                                                                                      | <a href="#">462</a> | <a href="#">484</a> | <a href="#">46</a> |
|    |               |            |                                        |     |                                                                                      | <a href="#">316</a> | <a href="#">370</a> | <a href="#">72</a> |
|    |               |            |                                        |     |                                                                                      | <a href="#">339</a> | <a href="#">353</a> | <a href="#">72</a> |
|    |               |            |                                        |     |                                                                                      | <a href="#">337</a> | <a href="#">355</a> | <a href="#">72</a> |
|    |               |            |                                        |     |                                                                                      | <a href="#">340</a> | <a href="#">351</a> | <a href="#">72</a> |
| 94 |               | PVX_001635 | hypothetical protein, conserved        | 634 |    | <a href="#">171</a> | <a href="#">184</a> | <a href="#">40</a> |
|    |               |            |                                        |     |                                                                                      | <a href="#">487</a> | <a href="#">509</a> | <a href="#">40</a> |
|    |               |            |                                        |     |                                                                                      | <a href="#">454</a> | <a href="#">477</a> | <a href="#">39</a> |
|    |               |            |                                        |     |                                                                                      | <a href="#">310</a> | <a href="#">334</a> | <a href="#">28</a> |
|    |               |            |                                        |     |                                                                                      | <a href="#">134</a> | <a href="#">165</a> | <a href="#">17</a> |
|    |               |            |                                        |     |                                                                                      | <a href="#">463</a> | <a href="#">472</a> | <a href="#">39</a> |
|    |               |            |                                        |     |                                                                                      | <a href="#">519</a> | <a href="#">533</a> | <a href="#">46</a> |
|    |               |            |                                        |     |                                                                                      | <a href="#">518</a> | <a href="#">540</a> | <a href="#">46</a> |
|    |               |            |                                        |     |                                                                                      | <a href="#">316</a> | <a href="#">382</a> | <a href="#">72</a> |
|    |               |            |                                        |     |                                                                                      | <a href="#">171</a> | <a href="#">184</a> | <a href="#">10</a> |
|    |               |            |                                        |     |                                                                                      | <a href="#">169</a> | <a href="#">184</a> | <a href="#">40</a> |
|    |               |            |                                        |     |                                                                                      | <a href="#">486</a> | <a href="#">505</a> | <a href="#">40</a> |
|    |               |            |                                        |     |                                                                                      | <a href="#">300</a> | <a href="#">325</a> | <a href="#">28</a> |
|    |               |            |                                        |     |                                                                                      | <a href="#">340</a> | <a href="#">355</a> | <a href="#">72</a> |
|    |               |            |                                        |     |                                                                                      | <a href="#">171</a> | <a href="#">184</a> | <a href="#">40</a> |
|    |               |            |                                        |     |                                                                                      | <a href="#">487</a> | <a href="#">506</a> | <a href="#">40</a> |
|    |               |            |                                        |     |                                                                                      | <a href="#">463</a> | <a href="#">485</a> | <a href="#">40</a> |
|    |               |            |                                        |     |                                                                                      | <a href="#">169</a> | <a href="#">194</a> | <a href="#">5</a>  |
|    |               |            |                                        |     |                                                                                      | <a href="#">285</a> | <a href="#">308</a> | <a href="#">28</a> |
|    |               |            |                                        |     |                                                                                      | <a href="#">104</a> | <a href="#">139</a> | <a href="#">17</a> |
|    |               |            |                                        |     |                                                                                      | <a href="#">247</a> | <a href="#">263</a> | <a href="#">23</a> |
|    |               |            |                                        |     |                                                                                      | <a href="#">439</a> | <a href="#">449</a> | <a href="#">39</a> |
|    |               |            |                                        |     |                                                                                      | <a href="#">249</a> | <a href="#">261</a> | <a href="#">23</a> |
|    |               |            |                                        |     |                                                                                      | <a href="#">439</a> | <a href="#">450</a> | <a href="#">39</a> |
|    |               |            |                                        |     |                                                                                      | <a href="#">494</a> | <a href="#">516</a> | <a href="#">46</a> |
|    |               |            |                                        |     |                                                                                      | <a href="#">292</a> | <a href="#">341</a> | <a href="#">72</a> |
|    |               |            |                                        |     |                                                                                      | <a href="#">145</a> | <a href="#">158</a> | <a href="#">10</a> |
|    |               |            |                                        |     |                                                                                      | <a href="#">463</a> | <a href="#">474</a> | <a href="#">10</a> |
|    |               |            |                                        |     |                                                                                      | <a href="#">462</a> | <a href="#">481</a> | <a href="#">40</a> |
|    |               |            |                                        |     |                                                                                      | <a href="#">275</a> | <a href="#">300</a> | <a href="#">28</a> |
|    |               |            |                                        |     |                                                                                      | <a href="#">57</a>  | <a href="#">70</a>  | <a href="#">72</a> |
|    |               |            |                                        |     |                                                                                      | <a href="#">315</a> | <a href="#">329</a> | <a href="#">72</a> |
|    |               |            |                                        |     |                                                                                      | <a href="#">596</a> | <a href="#">614</a> | <a href="#">13</a> |
|    |               |            |                                        |     |                                                                                      | <a href="#">314</a> | <a href="#">331</a> | <a href="#">72</a> |
|    |               |            |                                        |     |                                                                                      | <a href="#">431</a> | <a href="#">453</a> | <a href="#">40</a> |
| 96 | Not clustered | PVX_083580 | variable surface protein Vir24-related | 575 |  | <a href="#">344</a> | <a href="#">360</a> | <a href="#">72</a> |
|    |               |            |                                        |     |                                                                                      | <a href="#">556</a> | <a href="#">569</a> | <a href="#">13</a> |
|    |               |            |                                        |     |                                                                                      | <a href="#">407</a> | <a href="#">417</a> | <a href="#">39</a> |



|       |            |                                          |     |                                                                                      |  |  |                     |                     |                    |
|-------|------------|------------------------------------------|-----|--------------------------------------------------------------------------------------|--|--|---------------------|---------------------|--------------------|
|       |            |                                          |     |                                                                                      |  |  | <a href="#">42</a>  | <a href="#">90</a>  | <a href="#">72</a> |
|       |            |                                          |     |                                                                                      |  |  | <a href="#">150</a> | <a href="#">166</a> | <a href="#">40</a> |
| 101 E | PVX_022185 | variable surface protein Vir12-related   | 352 |    |  |  | <a href="#">12</a>  | <a href="#">23</a>  | <a href="#">23</a> |
|       |            |                                          |     |                                                                                      |  |  | <a href="#">11</a>  | <a href="#">30</a>  | <a href="#">23</a> |
|       |            |                                          |     |                                                                                      |  |  | <a href="#">93</a>  | <a href="#">157</a> | <a href="#">39</a> |
|       |            |                                          |     |                                                                                      |  |  | <a href="#">136</a> | <a href="#">142</a> | <a href="#">39</a> |
|       |            |                                          |     |                                                                                      |  |  | <a href="#">190</a> | <a href="#">211</a> | <a href="#">46</a> |
|       |            |                                          |     |                                                                                      |  |  | <a href="#">48</a>  | <a href="#">95</a>  | <a href="#">72</a> |
|       |            |                                          |     |                                                                                      |  |  | <a href="#">160</a> | <a href="#">172</a> | <a href="#">40</a> |
|       |            |                                          |     |                                                                                      |  |  | <a href="#">71</a>  | <a href="#">82</a>  | <a href="#">72</a> |
|       |            |                                          |     |                                                                                      |  |  | <a href="#">161</a> | <a href="#">180</a> | <a href="#">40</a> |
| 102 E | PVX_090290 | variable surface protein Vir12, putative | 288 |    |  |  | <a href="#">30</a>  | <a href="#">52</a>  | <a href="#">28</a> |
|       |            |                                          |     |                                                                                      |  |  | <a href="#">119</a> | <a href="#">135</a> | <a href="#">39</a> |
|       |            |                                          |     |                                                                                      |  |  | <a href="#">91</a>  | <a href="#">136</a> | <a href="#">39</a> |
|       |            |                                          |     |                                                                                      |  |  | <a href="#">125</a> | <a href="#">131</a> | <a href="#">39</a> |
|       |            |                                          |     |                                                                                      |  |  | <a href="#">180</a> | <a href="#">203</a> | <a href="#">46</a> |
|       |            |                                          |     |                                                                                      |  |  | <a href="#">35</a>  | <a href="#">99</a>  | <a href="#">72</a> |
|       |            |                                          |     |                                                                                      |  |  | <a href="#">144</a> | <a href="#">167</a> | <a href="#">40</a> |
|       |            |                                          |     |                                                                                      |  |  | <a href="#">58</a>  | <a href="#">72</a>  | <a href="#">72</a> |
|       |            |                                          |     |                                                                                      |  |  | <a href="#">262</a> | <a href="#">288</a> | <a href="#">13</a> |
|       |            |                                          |     |                                                                                      |  |  | <a href="#">59</a>  | <a href="#">74</a>  | <a href="#">72</a> |
| 103   | PVX_004537 | hypothetical protein                     | 466 |  |  |  | <a href="#">132</a> | <a href="#">157</a> | <a href="#">17</a> |
|       |            |                                          |     |                                                                                      |  |  | <a href="#">141</a> | <a href="#">150</a> | <a href="#">39</a> |
|       |            |                                          |     |                                                                                      |  |  | <a href="#">77</a>  | <a href="#">91</a>  | <a href="#">72</a> |
|       |            |                                          |     |                                                                                      |  |  | <a href="#">193</a> | <a href="#">210</a> | <a href="#">46</a> |
|       |            |                                          |     |                                                                                      |  |  | <a href="#">194</a> | <a href="#">216</a> | <a href="#">46</a> |
|       |            |                                          |     |                                                                                      |  |  | <a href="#">55</a>  | <a href="#">93</a>  | <a href="#">72</a> |
|       |            |                                          |     |                                                                                      |  |  | <a href="#">159</a> | <a href="#">178</a> | <a href="#">40</a> |
|       |            |                                          |     |                                                                                      |  |  | <a href="#">164</a> | <a href="#">183</a> | <a href="#">40</a> |
| 104   | PVX_005055 | hypothetical protein                     | 534 |  |  |  | <a href="#">89</a>  | <a href="#">104</a> | <a href="#">72</a> |
|       |            |                                          |     |                                                                                      |  |  | <a href="#">90</a>  | <a href="#">104</a> | <a href="#">72</a> |
|       |            |                                          |     |                                                                                      |  |  | <a href="#">89</a>  | <a href="#">105</a> | <a href="#">72</a> |
|       |            |                                          |     |                                                                                      |  |  | <a href="#">209</a> | <a href="#">225</a> | <a href="#">46</a> |
|       |            |                                          |     |                                                                                      |  |  | <a href="#">209</a> | <a href="#">227</a> | <a href="#">46</a> |
|       |            |                                          |     |                                                                                      |  |  | <a href="#">90</a>  | <a href="#">103</a> | <a href="#">72</a> |
|       |            |                                          |     |                                                                                      |  |  | <a href="#">509</a> | <a href="#">526</a> | <a href="#">13</a> |
|       |            |                                          |     |                                                                                      |  |  | <a href="#">210</a> | <a href="#">226</a> | <a href="#">46</a> |
|       |            |                                          |     |                                                                                      |  |  | <a href="#">88</a>  | <a href="#">105</a> | <a href="#">72</a> |
|       |            |                                          |     |                                                                                      |  |  | <a href="#">178</a> | <a href="#">200</a> | <a href="#">40</a> |
| 105   | PVX_090310 | hypothetical protein, conserved          | 449 |  |  |  | <a href="#">63</a>  | <a href="#">76</a>  | <a href="#">39</a> |
|       |            |                                          |     |                                                                                      |  |  | <a href="#">4</a>   | <a href="#">20</a>  | <a href="#">72</a> |
|       |            |                                          |     |                                                                                      |  |  | <a href="#">4</a>   | <a href="#">18</a>  | <a href="#">72</a> |
|       |            |                                          |     |                                                                                      |  |  | <a href="#">122</a> | <a href="#">140</a> | <a href="#">46</a> |
|       |            |                                          |     |                                                                                      |  |  | <a href="#">122</a> | <a href="#">142</a> | <a href="#">46</a> |
|       |            |                                          |     |                                                                                      |  |  | <a href="#">93</a>  | <a href="#">106</a> | <a href="#">40</a> |



|     |             |            |                                        |     |                                                                                      |  |                     |                     |                    |
|-----|-------------|------------|----------------------------------------|-----|--------------------------------------------------------------------------------------|--|---------------------|---------------------|--------------------|
|     |             |            |                                        |     |                                                                                      |  | <a href="#">4</a>   | <a href="#">12</a>  | <a href="#">72</a> |
|     |             |            |                                        |     |                                                                                      |  | <a href="#">3</a>   | <a href="#">17</a>  | <a href="#">72</a> |
|     |             |            |                                        |     |                                                                                      |  | <a href="#">125</a> | <a href="#">142</a> | <a href="#">46</a> |
|     |             |            |                                        |     |                                                                                      |  | <a href="#">4</a>   | <a href="#">18</a>  | <a href="#">72</a> |
| 106 | E           | PVX_001645 | variable surface protein Vir12-related | 529 |    |  | <a href="#">144</a> | <a href="#">160</a> | <a href="#">39</a> |
|     |             |            |                                        |     |                                                                                      |  | <a href="#">83</a>  | <a href="#">99</a>  | <a href="#">72</a> |
|     |             |            |                                        |     |                                                                                      |  | <a href="#">202</a> | <a href="#">220</a> | <a href="#">46</a> |
|     |             |            |                                        |     |                                                                                      |  | <a href="#">17</a>  | <a href="#">36</a>  | <a href="#">23</a> |
|     |             |            |                                        |     |                                                                                      |  | <a href="#">202</a> | <a href="#">221</a> | <a href="#">46</a> |
|     |             |            |                                        |     |                                                                                      |  | <a href="#">205</a> | <a href="#">221</a> | <a href="#">46</a> |
| 107 | Unavailable | PVX_005045 | variable surface protein Vir12-related | 445 |    |  | <a href="#">136</a> | <a href="#">154</a> | <a href="#">39</a> |
|     |             |            |                                        |     |                                                                                      |  | <a href="#">78</a>  | <a href="#">92</a>  | <a href="#">72</a> |
|     |             |            |                                        |     |                                                                                      |  | <a href="#">199</a> | <a href="#">216</a> | <a href="#">46</a> |
|     |             |            |                                        |     |                                                                                      |  | <a href="#">56</a>  | <a href="#">104</a> | <a href="#">72</a> |
|     |             |            |                                        |     |                                                                                      |  | <a href="#">165</a> | <a href="#">194</a> | <a href="#">40</a> |
|     |             |            |                                        |     |                                                                                      |  | <a href="#">204</a> | <a href="#">217</a> | <a href="#">46</a> |
|     |             |            |                                        |     |                                                                                      |  | <a href="#">78</a>  | <a href="#">92</a>  | <a href="#">72</a> |
|     |             |            |                                        |     |                                                                                      |  | <a href="#">200</a> | <a href="#">216</a> | <a href="#">46</a> |
|     |             |            |                                        |     |                                                                                      |  | <a href="#">78</a>  | <a href="#">93</a>  | <a href="#">72</a> |
|     |             |            |                                        |     |                                                                                      |  | <a href="#">99</a>  | <a href="#">132</a> | <a href="#">18</a> |
|     |             |            |                                        |     |                                                                                      |  | <a href="#">79</a>  | <a href="#">90</a>  | <a href="#">72</a> |
| 108 | E           | PVX_090305 | variable surface protein Vir12-related | 462 |  |  | <a href="#">138</a> | <a href="#">162</a> | <a href="#">39</a> |
|     |             |            |                                        |     |                                                                                      |  | <a href="#">135</a> | <a href="#">157</a> | <a href="#">39</a> |
|     |             |            |                                        |     |                                                                                      |  | <a href="#">201</a> | <a href="#">216</a> | <a href="#">46</a> |
|     |             |            |                                        |     |                                                                                      |  | <a href="#">200</a> | <a href="#">216</a> | <a href="#">46</a> |
|     |             |            |                                        |     |                                                                                      |  | <a href="#">56</a>  | <a href="#">105</a> | <a href="#">72</a> |
|     |             |            |                                        |     |                                                                                      |  | <a href="#">78</a>  | <a href="#">91</a>  | <a href="#">72</a> |
|     |             |            |                                        |     |                                                                                      |  | <a href="#">12</a>  | <a href="#">28</a>  | <a href="#">7</a>  |
|     |             |            |                                        |     |                                                                                      |  | <a href="#">201</a> | <a href="#">221</a> | <a href="#">46</a> |
|     |             |            |                                        |     |                                                                                      |  | <a href="#">78</a>  | <a href="#">91</a>  | <a href="#">72</a> |
|     |             |            |                                        |     |                                                                                      |  | <a href="#">103</a> | <a href="#">131</a> | <a href="#">18</a> |
|     |             |            |                                        |     |                                                                                      |  | <a href="#">80</a>  | <a href="#">91</a>  | <a href="#">72</a> |
| 109 | E           | PVX_093710 | variable surface protein Vir24-related | 488 |  |  | <a href="#">145</a> | <a href="#">162</a> | <a href="#">39</a> |
|     |             |            |                                        |     |                                                                                      |  | <a href="#">52</a>  | <a href="#">73</a>  | <a href="#">28</a> |
|     |             |            |                                        |     |                                                                                      |  | <a href="#">18</a>  | <a href="#">31</a>  | <a href="#">23</a> |
|     |             |            |                                        |     |                                                                                      |  | <a href="#">414</a> | <a href="#">425</a> | <a href="#">13</a> |
|     |             |            |                                        |     |                                                                                      |  | <a href="#">149</a> | <a href="#">159</a> | <a href="#">39</a> |
|     |             |            |                                        |     |                                                                                      |  | <a href="#">82</a>  | <a href="#">96</a>  | <a href="#">72</a> |
|     |             |            |                                        |     |                                                                                      |  | <a href="#">196</a> | <a href="#">220</a> | <a href="#">46</a> |
|     |             |            |                                        |     |                                                                                      |  | <a href="#">202</a> | <a href="#">223</a> | <a href="#">46</a> |
|     |             |            |                                        |     |                                                                                      |  | <a href="#">58</a>  | <a href="#">111</a> | <a href="#">72</a> |
|     |             |            |                                        |     |                                                                                      |  | <a href="#">82</a>  | <a href="#">96</a>  | <a href="#">72</a> |
|     |             |            |                                        |     |                                                                                      |  | <a href="#">204</a> | <a href="#">222</a> | <a href="#">46</a> |
|     |             |            |                                        |     |                                                                                      |  | <a href="#">82</a>  | <a href="#">96</a>  | <a href="#">72</a> |
|     |             |            |                                        |     |                                                                                      |  | <a href="#">83</a>  | <a href="#">94</a>  | <a href="#">72</a> |

|                                                                                     |                     |                     |                                           |     |                                                                                      |                                                                                       |                     |                     |                    |
|-------------------------------------------------------------------------------------|---------------------|---------------------|-------------------------------------------|-----|--------------------------------------------------------------------------------------|---------------------------------------------------------------------------------------|---------------------|---------------------|--------------------|
| 110                                                                                 | Not clustered       | PVX_124712          | variable surface protein Vir24-related    | 400 | 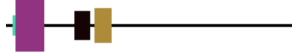   |    | <a href="#">10</a>  | <a href="#">25</a>  | <a href="#">28</a> |
|                                                                                     |                     |                     |                                           |     |                                                                                      |    | <a href="#">37</a>  | <a href="#">51</a>  | <a href="#">72</a> |
|                                                                                     |                     |                     |                                           |     |                                                                                      |    | <a href="#">125</a> | <a href="#">142</a> | <a href="#">46</a> |
|                                                                                     |                     |                     |                                           |     |                                                                                      |    | <a href="#">125</a> | <a href="#">146</a> | <a href="#">46</a> |
|                                                                                     |                     |                     |                                           |     |                                                                                      |    | <a href="#">14</a>  | <a href="#">53</a>  | <a href="#">72</a> |
|                                                                                     |                     |                     |                                           |     |                                                                                      |    | <a href="#">37</a>  | <a href="#">51</a>  | <a href="#">72</a> |
|                                                                                     |                     |                     |                                           |     |                                                                                      |    | <a href="#">33</a>  | <a href="#">52</a>  | <a href="#">72</a> |
|                                                                                     |                     |                     |                                           |     |                                                                                      |    | <a href="#">38</a>  | <a href="#">49</a>  | <a href="#">72</a> |
|                                                                                     |                     |                     |                                           |     |                                                                                      |    | <a href="#">96</a>  | <a href="#">116</a> | <a href="#">40</a> |
|                                                                                     |                     |                     |                                           |     |                                                                                      |    | <a href="#">49</a>  | <a href="#">73</a>  | <a href="#">28</a> |
| 111                                                                                 | E                   | PVX_018660          | variable surface protein Vir24-like       | 493 |    |    | <a href="#">49</a>  | <a href="#">73</a>  | <a href="#">28</a> |
|                                                                                     |                     |                     |                                           |     |                                                                                      |    | <a href="#">79</a>  | <a href="#">93</a>  | <a href="#">72</a> |
|                                                                                     |                     |                     |                                           |     |                                                                                      |    | <a href="#">10</a>  | <a href="#">27</a>  | <a href="#">23</a> |
|                                                                                     |                     |                     |                                           |     |                                                                                      |    | <a href="#">107</a> | <a href="#">143</a> | <a href="#">13</a> |
|                                                                                     |                     |                     |                                           |     |                                                                                      |    | <a href="#">145</a> | <a href="#">155</a> | <a href="#">39</a> |
|                                                                                     |                     |                     |                                           |     |                                                                                      |    | <a href="#">192</a> | <a href="#">215</a> | <a href="#">46</a> |
|                                                                                     |                     |                     |                                           |     |                                                                                      |    | <a href="#">199</a> | <a href="#">217</a> | <a href="#">46</a> |
|                                                                                     |                     |                     |                                           |     |                                                                                      |    | <a href="#">55</a>  | <a href="#">99</a>  | <a href="#">72</a> |
|                                                                                     |                     |                     |                                           |     |                                                                                      |    | <a href="#">79</a>  | <a href="#">92</a>  | <a href="#">72</a> |
|                                                                                     |                     |                     |                                           |     |                                                                                      |    | <a href="#">79</a>  | <a href="#">90</a>  | <a href="#">72</a> |
|  | <a href="#">169</a> | <a href="#">189</a> | <a href="#">40</a>                        |     |                                                                                      |                                                                                       |                     |                     |                    |
| 112                                                                                 | E                   | PVX_094240          | variable surface protein Vir12/24-related | 443 |  |   | <a href="#">206</a> | <a href="#">225</a> | <a href="#">39</a> |
|                                                                                     |                     |                     |                                           |     |                                                                                      |  | <a href="#">62</a>  | <a href="#">89</a>  | <a href="#">28</a> |
|                                                                                     |                     |                     |                                           |     |                                                                                      |  | <a href="#">259</a> | <a href="#">277</a> | <a href="#">46</a> |
|                                                                                     |                     |                     |                                           |     |                                                                                      |  | <a href="#">259</a> | <a href="#">282</a> | <a href="#">46</a> |
|                                                                                     |                     |                     |                                           |     |                                                                                      |  | <a href="#">68</a>  | <a href="#">130</a> | <a href="#">72</a> |
|                                                                                     |                     |                     |                                           |     |                                                                                      |  | <a href="#">92</a>  | <a href="#">107</a> | <a href="#">72</a> |
|                                                                                     |                     |                     |                                           |     |                                                                                      |  | <a href="#">263</a> | <a href="#">280</a> | <a href="#">46</a> |
|                                                                                     |                     |                     |                                           |     |                                                                                      |  | <a href="#">232</a> | <a href="#">254</a> | <a href="#">40</a> |
|                                                                                     |                     |                     |                                           |     |                                                                                      |  | <a href="#">51</a>  | <a href="#">72</a>  | <a href="#">28</a> |
|                                                                                     |                     |                     |                                           |     |                                                                                      |  | <a href="#">106</a> | <a href="#">162</a> | <a href="#">39</a> |
| 113                                                                                 | E                   | PVX_001615          | variable surface protein Vir12/24-related | 366 |  |  | <a href="#">140</a> | <a href="#">150</a> | <a href="#">39</a> |
|                                                                                     |                     |                     |                                           |     |                                                                                      |  | <a href="#">189</a> | <a href="#">208</a> | <a href="#">46</a> |
|                                                                                     |                     |                     |                                           |     |                                                                                      |  | <a href="#">192</a> | <a href="#">212</a> | <a href="#">46</a> |
|                                                                                     |                     |                     |                                           |     |                                                                                      |  | <a href="#">53</a>  | <a href="#">89</a>  | <a href="#">72</a> |
|                                                                                     |                     |                     |                                           |     |                                                                                      |  | <a href="#">348</a> | <a href="#">366</a> | <a href="#">30</a> |
|                                                                                     |                     |                     |                                           |     |                                                                                      |  | <a href="#">195</a> | <a href="#">212</a> | <a href="#">46</a> |
|                                                                                     |                     |                     |                                           |     |                                                                                      |  | <a href="#">164</a> | <a href="#">182</a> | <a href="#">40</a> |
|                                                                                     |                     |                     |                                           |     |                                                                                      |  | <a href="#">57</a>  | <a href="#">71</a>  | <a href="#">28</a> |
|                                                                                     |                     |                     |                                           |     |                                                                                      |  | <a href="#">80</a>  | <a href="#">96</a>  | <a href="#">72</a> |
|                                                                                     |                     |                     |                                           |     |                                                                                      |  | <a href="#">527</a> | <a href="#">540</a> | <a href="#">13</a> |
| 114                                                                                 | Not clustered       | PVX_124720          | variable surface protein Vir12-related    | 545 |  |  | <a href="#">12</a>  | <a href="#">31</a>  | <a href="#">23</a> |
|                                                                                     |                     |                     |                                           |     |                                                                                      |  | <a href="#">199</a> | <a href="#">219</a> | <a href="#">46</a> |
|                                                                                     |                     |                     |                                           |     |                                                                                      |  | <a href="#">57</a>  | <a href="#">107</a> | <a href="#">72</a> |
|                                                                                     |                     |                     |                                           |     |                                                                                      |  | <a href="#">78</a>  | <a href="#">93</a>  | <a href="#">72</a> |
|                                                                                     |                     |                     |                                           |     |                                                                                      |  | <a href="#">202</a> | <a href="#">219</a> | <a href="#">46</a> |

|     |               |            |                                           |     |                                                                                      |     |     |    |
|-----|---------------|------------|-------------------------------------------|-----|--------------------------------------------------------------------------------------|-----|-----|----|
| 115 | E             | PVX_096920 | variable surface protein Vir12-related    | 491 |    | 170 | 191 | 40 |
|     |               |            |                                           |     |                                                                                      | 165 | 181 | 40 |
|     |               |            |                                           |     |                                                                                      | 163 | 179 | 40 |
| 1   | Not clustered | PVX_004535 | variable surface protein Vir, putative    | 330 |    | 170 | 186 | 24 |
|     |               |            |                                           |     |                                                                                      | 73  | 95  | 72 |
|     |               |            |                                           |     |                                                                                      | 222 | 306 | 11 |
|     |               |            |                                           |     |                                                                                      | 24  | 48  | 10 |
|     |               |            |                                           |     |                                                                                      | 145 | 156 | 17 |
|     |               |            |                                           |     |                                                                                      | 105 | 130 | 11 |
|     |               |            |                                           |     |                                                                                      | 195 | 216 | 46 |
|     |               |            |                                           |     |                                                                                      | 195 | 216 | 46 |
|     |               |            |                                           |     |                                                                                      | 17  | 49  | 10 |
|     |               |            |                                           |     |                                                                                      | 171 | 187 | 24 |
| 2   |               | PVX_124700 | hypothetical protein                      | 255 |    | 74  | 97  | 72 |
|     |               |            |                                           |     |                                                                                      | 224 | 254 | 11 |
|     |               |            |                                           |     |                                                                                      | 25  | 49  | 10 |
|     |               |            |                                           |     |                                                                                      | 147 | 157 | 17 |
|     |               |            |                                           |     |                                                                                      | 189 | 194 | 9  |
|     |               |            |                                           |     |                                                                                      | 106 | 131 | 11 |
|     |               |            |                                           |     |                                                                                      | 193 | 219 | 46 |
|     |               |            |                                           |     |                                                                                      | 193 | 219 | 46 |
|     |               |            |                                           |     |                                                                                      | 189 | 194 | 9  |
|     |               |            |                                           |     |                                                                                      | 18  | 50  | 10 |
| 3   | C             | PVX_024690 | variable surface protein Vir12-related    | 343 |  | 173 | 190 | 24 |
|     |               |            |                                           |     |                                                                                      | 75  | 102 | 72 |
|     |               |            |                                           |     |                                                                                      | 228 | 293 | 11 |
|     |               |            |                                           |     |                                                                                      | 29  | 57  | 10 |
|     |               |            |                                           |     |                                                                                      | 149 | 166 | 17 |
|     |               |            |                                           |     |                                                                                      | 148 | 182 | 40 |
|     |               |            |                                           |     |                                                                                      | 192 | 199 | 9  |
|     |               |            |                                           |     |                                                                                      | 83  | 95  | 72 |
|     |               |            |                                           |     |                                                                                      | 110 | 134 | 11 |
|     |               |            |                                           |     |                                                                                      | 200 | 219 | 46 |
| 4   | C             | PVX_101600 | variable surface protein Vir16/32-related | 372 |  | 200 | 219 | 46 |
|     |               |            |                                           |     |                                                                                      | 300 | 323 | 7  |
|     |               |            |                                           |     |                                                                                      | 192 | 199 | 9  |
|     |               |            |                                           |     |                                                                                      | 59  | 70  | 10 |
|     |               |            |                                           |     |                                                                                      | 21  | 56  | 10 |
|     |               |            |                                           |     |                                                                                      | 176 | 192 | 24 |
|     |               |            |                                           |     |                                                                                      | 78  | 102 | 72 |
|     |               |            |                                           |     |                                                                                      | 88  | 138 | 31 |
|     |               |            |                                           |     |                                                                                      | 229 | 317 | 11 |
|     |               |            |                                           |     |                                                                                      | 31  | 59  | 10 |
| 151 | 168           | 17         |                                           |     |                                                                                      |     |     |    |
| 139 | 150           | 8          |                                           |     |                                                                                      |     |     |    |







|                     |                     |                    |                                        |     |                                                                                      |                     |                     |                    |
|---------------------|---------------------|--------------------|----------------------------------------|-----|--------------------------------------------------------------------------------------|---------------------|---------------------|--------------------|
|                     |                     |                    |                                        |     |                                                                                      | <a href="#">59</a>  | <a href="#">116</a> | <a href="#">72</a> |
|                     |                     |                    |                                        |     |                                                                                      | <a href="#">102</a> | <a href="#">133</a> | <a href="#">11</a> |
|                     |                     |                    |                                        |     |                                                                                      | <a href="#">56</a>  | <a href="#">71</a>  | <a href="#">10</a> |
|                     |                     |                    |                                        |     |                                                                                      | <a href="#">19</a>  | <a href="#">54</a>  | <a href="#">10</a> |
| 13                  |                     | PVX_090320         | hypothetical protein                   | 212 |    | <a href="#">174</a> | <a href="#">190</a> | <a href="#">24</a> |
|                     |                     |                    |                                        |     |                                                                                      | <a href="#">76</a>  | <a href="#">101</a> | <a href="#">72</a> |
|                     |                     |                    |                                        |     |                                                                                      | <a href="#">144</a> | <a href="#">167</a> | <a href="#">17</a> |
|                     |                     |                    |                                        |     |                                                                                      | <a href="#">28</a>  | <a href="#">56</a>  | <a href="#">10</a> |
|                     |                     |                    |                                        |     |                                                                                      | <a href="#">149</a> | <a href="#">165</a> | <a href="#">17</a> |
|                     |                     |                    |                                        |     |                                                                                      | <a href="#">137</a> | <a href="#">148</a> | <a href="#">8</a>  |
|                     |                     |                    |                                        |     |                                                                                      | <a href="#">59</a>  | <a href="#">113</a> | <a href="#">72</a> |
|                     |                     |                    |                                        |     |                                                                                      | <a href="#">105</a> | <a href="#">128</a> | <a href="#">11</a> |
|                     |                     |                    |                                        |     |                                                                                      | <a href="#">48</a>  | <a href="#">65</a>  | <a href="#">28</a> |
|                     |                     |                    |                                        |     |                                                                                      | <a href="#">59</a>  | <a href="#">72</a>  | <a href="#">10</a> |
|                     |                     |                    |                                        |     |                                                                                      | <a href="#">21</a>  | <a href="#">54</a>  | <a href="#">10</a> |
| 14                  |                     | PVX_005065         | hypothetical protein                   | 198 |    | <a href="#">68</a>  | <a href="#">91</a>  | <a href="#">72</a> |
|                     |                     |                    |                                        |     |                                                                                      | <a href="#">19</a>  | <a href="#">43</a>  | <a href="#">10</a> |
|                     |                     |                    |                                        |     |                                                                                      | <a href="#">141</a> | <a href="#">151</a> | <a href="#">17</a> |
|                     |                     |                    |                                        |     |                                                                                      | <a href="#">100</a> | <a href="#">125</a> | <a href="#">11</a> |
|                     |                     |                    |                                        |     |                                                                                      | <a href="#">12</a>  | <a href="#">44</a>  | <a href="#">10</a> |
| 15                  | C                   | PVX_101615         | variable surface protein Vir14-related | 361 |  | <a href="#">64</a>  | <a href="#">90</a>  | <a href="#">72</a> |
|                     |                     |                    |                                        |     |                                                                                      | <a href="#">130</a> | <a href="#">159</a> | <a href="#">17</a> |
|                     |                     |                    |                                        |     |                                                                                      | <a href="#">79</a>  | <a href="#">127</a> | <a href="#">31</a> |
|                     |                     |                    |                                        |     |                                                                                      | <a href="#">6</a>   | <a href="#">19</a>  | <a href="#">23</a> |
|                     |                     |                    |                                        |     |                                                                                      | <a href="#">31</a>  | <a href="#">56</a>  | <a href="#">10</a> |
|                     |                     |                    |                                        |     |                                                                                      | <a href="#">72</a>  | <a href="#">84</a>  | <a href="#">72</a> |
|                     |                     |                    |                                        |     |                                                                                      | <a href="#">143</a> | <a href="#">158</a> | <a href="#">39</a> |
|                     |                     |                    |                                        |     |                                                                                      | <a href="#">180</a> | <a href="#">227</a> | <a href="#">46</a> |
|                     |                     |                    |                                        |     |                                                                                      | <a href="#">180</a> | <a href="#">227</a> | <a href="#">46</a> |
|                     |                     |                    |                                        |     |                                                                                      | <a href="#">31</a>  | <a href="#">55</a>  | <a href="#">10</a> |
|                     |                     |                    |                                        |     |                                                                                      | <a href="#">76</a>  | <a href="#">85</a>  | <a href="#">72</a> |
|                     |                     |                    |                                        |     |                                                                                      | <a href="#">309</a> | <a href="#">324</a> | <a href="#">13</a> |
| 16                  | C                   | PVX_124710         | variable surface protein Vir4-related  | 313 |  | <a href="#">63</a>  | <a href="#">84</a>  | <a href="#">72</a> |
|                     |                     |                    |                                        |     |                                                                                      | <a href="#">73</a>  | <a href="#">128</a> | <a href="#">31</a> |
|                     |                     |                    |                                        |     |                                                                                      | <a href="#">3</a>   | <a href="#">19</a>  | <a href="#">23</a> |
|                     |                     |                    |                                        |     |                                                                                      | <a href="#">30</a>  | <a href="#">55</a>  | <a href="#">10</a> |
|                     |                     |                    |                                        |     |                                                                                      | <a href="#">71</a>  | <a href="#">83</a>  | <a href="#">72</a> |
|                     |                     |                    |                                        |     |                                                                                      | <a href="#">143</a> | <a href="#">156</a> | <a href="#">39</a> |
|                     |                     |                    |                                        |     |                                                                                      | <a href="#">178</a> | <a href="#">225</a> | <a href="#">46</a> |
| <a href="#">165</a> | <a href="#">177</a> | <a href="#">10</a> |                                        |     |                                                                                      |                     |                     |                    |
|                     |                     |                    |                                        |     |                                                                                      | <a href="#">178</a> | <a href="#">225</a> | <a href="#">46</a> |
|                     |                     |                    |                                        |     |                                                                                      | <a href="#">30</a>  | <a href="#">54</a>  | <a href="#">10</a> |
| 17                  | C                   | PVX_120330         | variable surface protein Vir14-related | 418 |  | <a href="#">71</a>  | <a href="#">98</a>  | <a href="#">72</a> |
|                     |                     |                    |                                        |     |                                                                                      | <a href="#">37</a>  | <a href="#">62</a>  | <a href="#">10</a> |
|                     |                     |                    |                                        |     |                                                                                      | <a href="#">79</a>  | <a href="#">95</a>  | <a href="#">72</a> |

|    |   |            |                                           |     |                                                                                      |  |                     |                     |                    |
|----|---|------------|-------------------------------------------|-----|--------------------------------------------------------------------------------------|--|---------------------|---------------------|--------------------|
|    |   |            |                                           |     |                                                                                      |  | <a href="#">150</a> | <a href="#">161</a> | <a href="#">39</a> |
|    |   |            |                                           |     |                                                                                      |  | <a href="#">54</a>  | <a href="#">104</a> | <a href="#">72</a> |
|    |   |            |                                           |     |                                                                                      |  | <a href="#">185</a> | <a href="#">232</a> | <a href="#">46</a> |
|    |   |            |                                           |     |                                                                                      |  | <a href="#">185</a> | <a href="#">232</a> | <a href="#">46</a> |
|    |   |            |                                           |     |                                                                                      |  | <a href="#">37</a>  | <a href="#">62</a>  | <a href="#">10</a> |
| 18 | C | PVX_004510 | variable surface protein Vir4/14-related  | 353 | 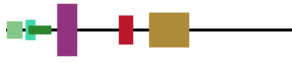   |  | <a href="#">64</a>  | <a href="#">88</a>  | <a href="#">72</a> |
|    |   |            |                                           |     |                                                                                      |  | <a href="#">3</a>   | <a href="#">20</a>  | <a href="#">23</a> |
|    |   |            |                                           |     |                                                                                      |  | <a href="#">29</a>  | <a href="#">55</a>  | <a href="#">10</a> |
|    |   |            |                                           |     |                                                                                      |  | <a href="#">141</a> | <a href="#">156</a> | <a href="#">39</a> |
|    |   |            |                                           |     |                                                                                      |  | <a href="#">199</a> | <a href="#">212</a> | <a href="#">46</a> |
|    |   |            |                                           |     |                                                                                      |  | <a href="#">178</a> | <a href="#">225</a> | <a href="#">46</a> |
|    |   |            |                                           |     |                                                                                      |  | <a href="#">178</a> | <a href="#">225</a> | <a href="#">46</a> |
|    |   |            |                                           |     |                                                                                      |  | <a href="#">25</a>  | <a href="#">37</a>  | <a href="#">28</a> |
|    |   |            |                                           |     |                                                                                      |  | <a href="#">29</a>  | <a href="#">54</a>  | <a href="#">10</a> |
|    |   |            |                                           |     |                                                                                      |  | <a href="#">75</a>  | <a href="#">84</a>  | <a href="#">72</a> |
| 19 | C | PVX_115475 | variable surface protein Vir14, putative  | 229 |    |  | <a href="#">162</a> | <a href="#">179</a> | <a href="#">24</a> |
|    |   |            |                                           |     |                                                                                      |  | <a href="#">70</a>  | <a href="#">91</a>  | <a href="#">72</a> |
|    |   |            |                                           |     |                                                                                      |  | <a href="#">132</a> | <a href="#">154</a> | <a href="#">17</a> |
|    |   |            |                                           |     |                                                                                      |  | <a href="#">50</a>  | <a href="#">87</a>  | <a href="#">72</a> |
|    |   |            |                                           |     |                                                                                      |  | <a href="#">184</a> | <a href="#">215</a> | <a href="#">46</a> |
|    |   |            |                                           |     |                                                                                      |  | <a href="#">184</a> | <a href="#">215</a> | <a href="#">46</a> |
|    |   |            |                                           |     |                                                                                      |  | <a href="#">173</a> | <a href="#">189</a> | <a href="#">24</a> |
|    |   |            |                                           |     |                                                                                      |  | <a href="#">75</a>  | <a href="#">102</a> | <a href="#">72</a> |
|    |   |            |                                           |     |                                                                                      |  | <a href="#">142</a> | <a href="#">165</a> | <a href="#">17</a> |
|    |   |            |                                           |     |                                                                                      |  | <a href="#">134</a> | <a href="#">182</a> | <a href="#">40</a> |
| 20 | C | PVX_113230 | variable surface protein Vir14-related    | 440 |  |  | <a href="#">83</a>  | <a href="#">95</a>  | <a href="#">72</a> |
|    |   |            |                                           |     |                                                                                      |  | <a href="#">330</a> | <a href="#">354</a> | <a href="#">74</a> |
|    |   |            |                                           |     |                                                                                      |  | <a href="#">152</a> | <a href="#">163</a> | <a href="#">39</a> |
|    |   |            |                                           |     |                                                                                      |  | <a href="#">190</a> | <a href="#">236</a> | <a href="#">46</a> |
|    |   |            |                                           |     |                                                                                      |  | <a href="#">333</a> | <a href="#">346</a> | <a href="#">74</a> |
|    |   |            |                                           |     |                                                                                      |  | <a href="#">190</a> | <a href="#">236</a> | <a href="#">46</a> |
|    |   |            |                                           |     |                                                                                      |  | <a href="#">16</a>  | <a href="#">31</a>  | <a href="#">17</a> |
| 21 |   | PVX_094260 | hypothetical protein                      | 198 |  |  | <a href="#">18</a>  | <a href="#">32</a>  | <a href="#">39</a> |
|    |   |            |                                           |     |                                                                                      |  | <a href="#">60</a>  | <a href="#">94</a>  | <a href="#">46</a> |
|    |   |            |                                           |     |                                                                                      |  | <a href="#">60</a>  | <a href="#">94</a>  | <a href="#">46</a> |
|    |   |            |                                           |     |                                                                                      |  | <a href="#">39</a>  | <a href="#">105</a> | <a href="#">11</a> |
| 22 | C | PVX_095995 | variable surface protein Vir16/32-related | 315 |  |  | <a href="#">289</a> | <a href="#">313</a> | <a href="#">8</a>  |
|    |   |            |                                           |     |                                                                                      |  | <a href="#">80</a>  | <a href="#">93</a>  | <a href="#">72</a> |
|    |   |            |                                           |     |                                                                                      |  | <a href="#">125</a> | <a href="#">174</a> | <a href="#">25</a> |
|    |   |            |                                           |     |                                                                                      |  | <a href="#">328</a> | <a href="#">351</a> | <a href="#">8</a>  |
|    |   |            |                                           |     |                                                                                      |  | <a href="#">162</a> | <a href="#">179</a> | <a href="#">40</a> |
| 23 | C | PVX_004525 | variable surface protein Vir16/32-related | 353 |  |  | <a href="#">80</a>  | <a href="#">97</a>  | <a href="#">72</a> |
|    |   |            |                                           |     |                                                                                      |  | <a href="#">125</a> | <a href="#">161</a> | <a href="#">25</a> |
|    |   |            |                                           |     |                                                                                      |  | <a href="#">125</a> | <a href="#">173</a> | <a href="#">25</a> |
| 24 | C | PVX_104185 | variable surface                          | 288 |  |  | <a href="#">231</a> | <a href="#">257</a> | <a href="#">74</a> |



|    |               |            |                                                     |     |                                                                                      |  |                     |                     |                    |
|----|---------------|------------|-----------------------------------------------------|-----|--------------------------------------------------------------------------------------|--|---------------------|---------------------|--------------------|
|    |               |            |                                                     |     |                                                                                      |  | <a href="#">21</a>  | <a href="#">38</a>  | <a href="#">72</a> |
|    |               |            |                                                     |     |                                                                                      |  | <a href="#">69</a>  | <a href="#">118</a> | <a href="#">25</a> |
|    |               |            |                                                     |     |                                                                                      |  | <a href="#">21</a>  | <a href="#">38</a>  | <a href="#">72</a> |
| 25 | C             | PVX_127260 | variable surface protein Vir16, putative, truncated | 210 |    |  | <a href="#">146</a> | <a href="#">158</a> | <a href="#">39</a> |
|    |               |            |                                                     |     |                                                                                      |  | <a href="#">54</a>  | <a href="#">66</a>  | <a href="#">28</a> |
|    |               |            |                                                     |     |                                                                                      |  | <a href="#">163</a> | <a href="#">186</a> | <a href="#">40</a> |
|    |               |            |                                                     |     |                                                                                      |  | <a href="#">84</a>  | <a href="#">96</a>  | <a href="#">72</a> |
|    |               |            |                                                     |     |                                                                                      |  | <a href="#">57</a>  | <a href="#">70</a>  | <a href="#">21</a> |
|    |               |            |                                                     |     |                                                                                      |  | <a href="#">85</a>  | <a href="#">97</a>  | <a href="#">72</a> |
|    |               |            |                                                     |     |                                                                                      |  | <a href="#">128</a> | <a href="#">176</a> | <a href="#">25</a> |
| 26 | C             | PVX_043690 | variable surface protein Vir32, truncated, putative | 85  |    |  | <a href="#">10</a>  | <a href="#">21</a>  | <a href="#">14</a> |
|    |               |            |                                                     |     |                                                                                      |  | <a href="#">30</a>  | <a href="#">41</a>  | <a href="#">74</a> |
|    |               |            |                                                     |     |                                                                                      |  | <a href="#">48</a>  | <a href="#">82</a>  | <a href="#">22</a> |
|    |               |            |                                                     |     |                                                                                      |  | <a href="#">48</a>  | <a href="#">75</a>  | <a href="#">22</a> |
|    |               |            |                                                     |     |                                                                                      |  | <a href="#">23</a>  | <a href="#">44</a>  | <a href="#">74</a> |
|    |               |            |                                                     |     |                                                                                      |  | <a href="#">77</a>  | <a href="#">85</a>  | <a href="#">17</a> |
|    |               |            |                                                     |     |                                                                                      |  | <a href="#">7</a>   | <a href="#">21</a>  | <a href="#">14</a> |
| 27 | Not clustered | PVX_044190 | variable surface protein Vir32, putative            | 61  |   |  | <a href="#">6</a>   | <a href="#">17</a>  | <a href="#">74</a> |
|    |               |            |                                                     |     |                                                                                      |  | <a href="#">24</a>  | <a href="#">58</a>  | <a href="#">22</a> |
|    |               |            |                                                     |     |                                                                                      |  | <a href="#">24</a>  | <a href="#">51</a>  | <a href="#">22</a> |
|    |               |            |                                                     |     |                                                                                      |  | <a href="#">1</a>   | <a href="#">20</a>  | <a href="#">74</a> |
|    |               |            |                                                     |     |                                                                                      |  | <a href="#">53</a>  | <a href="#">61</a>  | <a href="#">17</a> |
| 28 | C             | PVX_009090 | variable surface protein Vir14-like                 | 337 |  |  | <a href="#">132</a> | <a href="#">147</a> | <a href="#">39</a> |
|    |               |            |                                                     |     |                                                                                      |  | <a href="#">285</a> | <a href="#">297</a> | <a href="#">74</a> |
|    |               |            |                                                     |     |                                                                                      |  | <a href="#">68</a>  | <a href="#">125</a> | <a href="#">31</a> |
|    |               |            |                                                     |     |                                                                                      |  | <a href="#">256</a> | <a href="#">278</a> | <a href="#">6</a>  |
|    |               |            |                                                     |     |                                                                                      |  | <a href="#">285</a> | <a href="#">297</a> | <a href="#">74</a> |
|    |               |            |                                                     |     |                                                                                      |  | <a href="#">38</a>  | <a href="#">52</a>  | <a href="#">28</a> |
|    |               |            |                                                     |     |                                                                                      |  | <a href="#">182</a> | <a href="#">214</a> | <a href="#">33</a> |
|    |               |            |                                                     |     |                                                                                      |  | <a href="#">304</a> | <a href="#">337</a> | <a href="#">6</a>  |
|    |               |            |                                                     |     |                                                                                      |  | <a href="#">70</a>  | <a href="#">85</a>  | <a href="#">72</a> |
|    |               |            |                                                     |     |                                                                                      |  | <a href="#">286</a> | <a href="#">297</a> | <a href="#">74</a> |
|    |               |            |                                                     |     |                                                                                      |  | <a href="#">286</a> | <a href="#">297</a> | <a href="#">74</a> |
|    |               |            |                                                     |     |                                                                                      |  | <a href="#">41</a>  | <a href="#">55</a>  | <a href="#">21</a> |
|    |               |            |                                                     |     |                                                                                      |  | <a href="#">303</a> | <a href="#">337</a> | <a href="#">6</a>  |
|    |               |            |                                                     |     |                                                                                      |  | <a href="#">70</a>  | <a href="#">81</a>  | <a href="#">72</a> |
|    |               |            |                                                     |     |                                                                                      |  | <a href="#">118</a> | <a href="#">164</a> | <a href="#">25</a> |
|    |               |            |                                                     |     |                                                                                      |  | <a href="#">70</a>  | <a href="#">85</a>  | <a href="#">72</a> |
| 29 | C             | PVX_072690 | variable surface protein Vir4/14-related            | 324 |  |  | <a href="#">127</a> | <a href="#">143</a> | <a href="#">39</a> |
|    |               |            |                                                     |     |                                                                                      |  | <a href="#">274</a> | <a href="#">284</a> | <a href="#">74</a> |
|    |               |            |                                                     |     |                                                                                      |  | <a href="#">65</a>  | <a href="#">80</a>  | <a href="#">72</a> |
|    |               |            |                                                     |     |                                                                                      |  | <a href="#">62</a>  | <a href="#">124</a> | <a href="#">31</a> |
|    |               |            |                                                     |     |                                                                                      |  | <a href="#">243</a> | <a href="#">265</a> | <a href="#">6</a>  |
|    |               |            |                                                     |     |                                                                                      |  | <a href="#">274</a> | <a href="#">284</a> | <a href="#">74</a> |
|    |               |            |                                                     |     |                                                                                      |  | <a href="#">273</a> | <a href="#">288</a> | <a href="#">74</a> |

|    |   |            |                                           |     |                                                                                      |                     |                     |                    |
|----|---|------------|-------------------------------------------|-----|--------------------------------------------------------------------------------------|---------------------|---------------------|--------------------|
|    |   |            |                                           |     |                                                                                      | <a href="#">37</a>  | <a href="#">47</a>  | <a href="#">28</a> |
|    |   |            |                                           |     |                                                                                      | <a href="#">181</a> | <a href="#">205</a> | <a href="#">33</a> |
|    |   |            |                                           |     |                                                                                      | <a href="#">291</a> | <a href="#">324</a> | <a href="#">6</a>  |
|    |   |            |                                           |     |                                                                                      | <a href="#">273</a> | <a href="#">287</a> | <a href="#">74</a> |
|    |   |            |                                           |     |                                                                                      | <a href="#">266</a> | <a href="#">284</a> | <a href="#">74</a> |
|    |   |            |                                           |     |                                                                                      | <a href="#">290</a> | <a href="#">324</a> | <a href="#">6</a>  |
|    |   |            |                                           |     |                                                                                      | <a href="#">69</a>  | <a href="#">76</a>  | <a href="#">72</a> |
|    |   |            |                                           |     |                                                                                      | <a href="#">114</a> | <a href="#">157</a> | <a href="#">25</a> |
| 30 | C | PVX_026190 | variable surface protein Vir14, putative  | 353 |    | <a href="#">145</a> | <a href="#">160</a> | <a href="#">39</a> |
|    |   |            |                                           |     |                                                                                      | <a href="#">301</a> | <a href="#">313</a> | <a href="#">74</a> |
|    |   |            |                                           |     |                                                                                      | <a href="#">85</a>  | <a href="#">97</a>  | <a href="#">72</a> |
|    |   |            |                                           |     |                                                                                      | <a href="#">78</a>  | <a href="#">144</a> | <a href="#">31</a> |
|    |   |            |                                           |     |                                                                                      | <a href="#">272</a> | <a href="#">294</a> | <a href="#">6</a>  |
|    |   |            |                                           |     |                                                                                      | <a href="#">301</a> | <a href="#">313</a> | <a href="#">74</a> |
|    |   |            |                                           |     |                                                                                      | <a href="#">198</a> | <a href="#">223</a> | <a href="#">33</a> |
|    |   |            |                                           |     |                                                                                      | <a href="#">320</a> | <a href="#">353</a> | <a href="#">6</a>  |
|    |   |            |                                           |     |                                                                                      | <a href="#">82</a>  | <a href="#">97</a>  | <a href="#">72</a> |
|    |   |            |                                           |     |                                                                                      | <a href="#">296</a> | <a href="#">314</a> | <a href="#">74</a> |
|    |   |            |                                           |     |                                                                                      | <a href="#">319</a> | <a href="#">353</a> | <a href="#">6</a>  |
|    |   |            |                                           |     |                                                                                      | <a href="#">82</a>  | <a href="#">94</a>  | <a href="#">72</a> |
|    |   |            |                                           |     |                                                                                      | <a href="#">82</a>  | <a href="#">97</a>  | <a href="#">72</a> |
| 31 | C | PVX_076695 | variable surface protein Vir14/32-related | 325 |  | <a href="#">116</a> | <a href="#">132</a> | <a href="#">39</a> |
|    |   |            |                                           |     |                                                                                      | <a href="#">273</a> | <a href="#">285</a> | <a href="#">74</a> |
|    |   |            |                                           |     |                                                                                      | <a href="#">57</a>  | <a href="#">69</a>  | <a href="#">72</a> |
|    |   |            |                                           |     |                                                                                      | <a href="#">50</a>  | <a href="#">115</a> | <a href="#">31</a> |
|    |   |            |                                           |     |                                                                                      | <a href="#">244</a> | <a href="#">266</a> | <a href="#">6</a>  |
|    |   |            |                                           |     |                                                                                      | <a href="#">273</a> | <a href="#">285</a> | <a href="#">74</a> |
|    |   |            |                                           |     |                                                                                      | <a href="#">171</a> | <a href="#">196</a> | <a href="#">33</a> |
|    |   |            |                                           |     |                                                                                      | <a href="#">292</a> | <a href="#">325</a> | <a href="#">6</a>  |
|    |   |            |                                           |     |                                                                                      | <a href="#">56</a>  | <a href="#">65</a>  | <a href="#">72</a> |
|    |   |            |                                           |     |                                                                                      | <a href="#">268</a> | <a href="#">285</a> | <a href="#">74</a> |
|    |   |            |                                           |     |                                                                                      | <a href="#">291</a> | <a href="#">325</a> | <a href="#">6</a>  |
|    |   |            |                                           |     |                                                                                      | <a href="#">56</a>  | <a href="#">67</a>  | <a href="#">72</a> |
|    |   |            |                                           |     |                                                                                      | <a href="#">57</a>  | <a href="#">66</a>  | <a href="#">72</a> |
|    |   |            |                                           |     |                                                                                      | <a href="#">57</a>  | <a href="#">65</a>  | <a href="#">72</a> |
| 32 | C | PVX_028190 | variable surface protein Vir4, putative   | 284 |  | <a href="#">91</a>  | <a href="#">107</a> | <a href="#">39</a> |
|    |   |            |                                           |     |                                                                                      | <a href="#">234</a> | <a href="#">244</a> | <a href="#">74</a> |
|    |   |            |                                           |     |                                                                                      | <a href="#">1</a>   | <a href="#">12</a>  | <a href="#">28</a> |
|    |   |            |                                           |     |                                                                                      | <a href="#">26</a>  | <a href="#">90</a>  | <a href="#">31</a> |
|    |   |            |                                           |     |                                                                                      | <a href="#">206</a> | <a href="#">225</a> | <a href="#">6</a>  |
|    |   |            |                                           |     |                                                                                      | <a href="#">234</a> | <a href="#">244</a> | <a href="#">74</a> |
|    |   |            |                                           |     |                                                                                      | <a href="#">145</a> | <a href="#">171</a> | <a href="#">33</a> |
|    |   |            |                                           |     |                                                                                      | <a href="#">251</a> | <a href="#">284</a> | <a href="#">6</a>  |
|    |   |            |                                           |     |                                                                                      | <a href="#">28</a>  | <a href="#">39</a>  | <a href="#">72</a> |
|    |   |            |                                           |     |                                                                                      | <a href="#">137</a> | <a href="#">171</a> | <a href="#">46</a> |

|    |   |            |                                          |     |                                                                                      |                                                                                    |                     |                     |                    |
|----|---|------------|------------------------------------------|-----|--------------------------------------------------------------------------------------|------------------------------------------------------------------------------------|---------------------|---------------------|--------------------|
|    |   |            |                                          |     |                                                                                      |  | <a href="#">226</a> | <a href="#">245</a> | <a href="#">74</a> |
|    |   |            |                                          |     |                                                                                      |                                                                                    | <a href="#">137</a> | <a href="#">171</a> | <a href="#">46</a> |
|    |   |            |                                          |     |                                                                                      |                                                                                    | <a href="#">250</a> | <a href="#">284</a> | <a href="#">6</a>  |
|    |   |            |                                          |     |                                                                                      |                                                                                    | <a href="#">28</a>  | <a href="#">40</a>  | <a href="#">72</a> |
| 33 | C | PVX_103665 | variable surface protein<br>Vir4/32-like | 290 |                                                                                      |                                                                                    | <a href="#">115</a> | <a href="#">131</a> | <a href="#">39</a> |
|    |   |            |                                          |     |                                                                                      |                                                                                    | <a href="#">142</a> | <a href="#">164</a> | <a href="#">24</a> |
|    |   |            |                                          |     |                                                                                      |                                                                                    | <a href="#">56</a>  | <a href="#">69</a>  | <a href="#">72</a> |
|    |   |            |                                          |     |                                                                                      |                                                                                    | <a href="#">50</a>  | <a href="#">114</a> | <a href="#">31</a> |
|    |   |            |                                          |     |                                                                                      |                                                                                    | <a href="#">228</a> | <a href="#">241</a> | <a href="#">6</a>  |
|    |   |            |                                          |     |                                                                                      |                                                                                    | <a href="#">142</a> | <a href="#">157</a> | <a href="#">24</a> |
|    |   |            |                                          |     |                                                                                      |                                                                                    | <a href="#">168</a> | <a href="#">193</a> | <a href="#">33</a> |
|    |   |            |                                          |     |                                                                                      |                                                                                    | <a href="#">257</a> | <a href="#">290</a> | <a href="#">6</a>  |
|    |   |            |                                          |     |                                                                                      |                                                                                    | <a href="#">55</a>  | <a href="#">65</a>  | <a href="#">72</a> |
|    |   |            |                                          |     |                                                                                      |                                                                                    | <a href="#">159</a> | <a href="#">193</a> | <a href="#">46</a> |
|    |   |            |                                          |     |                                                                                      |                                                                                    | <a href="#">159</a> | <a href="#">193</a> | <a href="#">46</a> |
|    |   |            |                                          |     |                                                                                      |                                                                                    | <a href="#">256</a> | <a href="#">290</a> | <a href="#">6</a>  |
|    |   |            |                                          |     |                                                                                      |                                                                                    | <a href="#">55</a>  | <a href="#">64</a>  | <a href="#">72</a> |
|    |   |            |                                          |     |                                                                                      |                                                                                    | <a href="#">290</a> | <a href="#">308</a> | <a href="#">74</a> |
|    |   |            |                                          |     |                                                                                      |                                                                                    | <a href="#">290</a> | <a href="#">308</a> | <a href="#">74</a> |
|    |   |            |                                          |     |                                                                                      |                                                                                    | <a href="#">6</a>   | <a href="#">31</a>  | <a href="#">23</a> |
|    |   |            |                                          |     |                                                                                      |                                                                                    | <a href="#">190</a> | <a href="#">217</a> | <a href="#">33</a> |
|    |   |            |                                          |     |                                                                                      |                                                                                    | <a href="#">75</a>  | <a href="#">87</a>  | <a href="#">72</a> |
|    |   |            |                                          |     |                                                                                      |                                                                                    | <a href="#">298</a> | <a href="#">325</a> | <a href="#">74</a> |
|    |   |            |                                          |     |                                                                                      |                                                                                    | <a href="#">143</a> | <a href="#">158</a> | <a href="#">39</a> |
|    |   |            |                                          |     |                                                                                      |                                                                                    | <a href="#">51</a>  | <a href="#">109</a> | <a href="#">72</a> |
|    |   |            |                                          |     |                                                                                      |                                                                                    | <a href="#">181</a> | <a href="#">216</a> | <a href="#">46</a> |
|    |   |            |                                          |     |                                                                                      |                                                                                    | <a href="#">298</a> | <a href="#">306</a> | <a href="#">74</a> |
|    |   |            |                                          |     |                                                                                      |                                                                                    | <a href="#">181</a> | <a href="#">216</a> | <a href="#">46</a> |
|    |   |            |                                          |     |                                                                                      |                                                                                    | <a href="#">44</a>  | <a href="#">58</a>  | <a href="#">28</a> |
|    |   |            |                                          |     |                                                                                      |                                                                                    | <a href="#">76</a>  | <a href="#">84</a>  | <a href="#">72</a> |
|    |   |            |                                          |     |                                                                                      |                                                                                    | <a href="#">75</a>  | <a href="#">87</a>  | <a href="#">72</a> |
|    |   |            |                                          |     |                                                                                      |                                                                                    | <a href="#">76</a>  | <a href="#">82</a>  | <a href="#">72</a> |
|    |   |            |                                          |     |                                                                                      |                                                                                    | <a href="#">75</a>  | <a href="#">90</a>  | <a href="#">72</a> |
|    |   |            |                                          |     |                                                                                      |                                                                                    | <a href="#">76</a>  | <a href="#">88</a>  | <a href="#">72</a> |
|    |   |            |                                          |     |                                                                                      |                                                                                    | <a href="#">141</a> | <a href="#">159</a> | <a href="#">39</a> |
|    |   |            |                                          |     |                                                                                      |                                                                                    | <a href="#">168</a> | <a href="#">187</a> | <a href="#">24</a> |
|    |   |            |                                          |     |                                                                                      |                                                                                    | <a href="#">75</a>  | <a href="#">138</a> | <a href="#">31</a> |
|    |   |            |                                          |     |                                                                                      |                                                                                    | <a href="#">18</a>  | <a href="#">44</a>  | <a href="#">12</a> |
|    |   |            |                                          |     |                                                                                      |                                                                                    | <a href="#">194</a> | <a href="#">217</a> | <a href="#">33</a> |
|    |   |            |                                          |     |                                                                                      |                                                                                    | <a href="#">79</a>  | <a href="#">91</a>  | <a href="#">72</a> |
|    |   |            |                                          |     |                                                                                      |                                                                                    | <a href="#">147</a> | <a href="#">160</a> | <a href="#">39</a> |
|    |   |            |                                          |     |                                                                                      |                                                                                    | <a href="#">79</a>  | <a href="#">90</a>  | <a href="#">72</a> |
|    |   |            |                                          |     |                                                                                      |                                                                                    | <a href="#">127</a> | <a href="#">175</a> | <a href="#">25</a> |
|    |   |            |                                          |     |                                                                                      |                                                                                    | <a href="#">116</a> | <a href="#">132</a> | <a href="#">39</a> |
| 36 | C | PVX_102125 | variable surface protein Vir32,          | 153 |  | <a href="#">51</a>                                                                 | <a href="#">115</a> | <a href="#">31</a>  |                    |

|    |   |            |                                               |     |                                                                                      |  |                     |                     |                    |
|----|---|------------|-----------------------------------------------|-----|--------------------------------------------------------------------------------------|--|---------------------|---------------------|--------------------|
|    |   |            | truncated,<br>putative                        |     |                                                                                      |  | <a href="#">6</a>   | <a href="#">17</a>  | <a href="#">12</a> |
|    |   |            |                                               |     |                                                                                      |  | <a href="#">56</a>  | <a href="#">66</a>  | <a href="#">72</a> |
|    |   |            |                                               |     |                                                                                      |  | <a href="#">56</a>  | <a href="#">65</a>  | <a href="#">72</a> |
|    |   |            |                                               |     |                                                                                      |  | <a href="#">111</a> | <a href="#">147</a> | <a href="#">25</a> |
|    |   |            |                                               |     |                                                                                      |  | <a href="#">190</a> | <a href="#">212</a> | <a href="#">24</a> |
|    |   |            |                                               |     |                                                                                      |  | <a href="#">96</a>  | <a href="#">157</a> | <a href="#">31</a> |
|    |   |            |                                               |     |                                                                                      |  | <a href="#">42</a>  | <a href="#">61</a>  | <a href="#">12</a> |
|    |   |            |                                               |     |                                                                                      |  | <a href="#">215</a> | <a href="#">243</a> | <a href="#">33</a> |
|    |   |            |                                               |     |                                                                                      |  | <a href="#">100</a> | <a href="#">115</a> | <a href="#">72</a> |
|    |   |            |                                               |     |                                                                                      |  | <a href="#">207</a> | <a href="#">240</a> | <a href="#">46</a> |
|    |   |            |                                               |     |                                                                                      |  | <a href="#">308</a> | <a href="#">317</a> | <a href="#">74</a> |
|    |   |            |                                               |     |                                                                                      |  | <a href="#">207</a> | <a href="#">240</a> | <a href="#">46</a> |
|    |   |            |                                               |     |                                                                                      |  | <a href="#">72</a>  | <a href="#">89</a>  | <a href="#">21</a> |
|    |   |            |                                               |     |                                                                                      |  | <a href="#">100</a> | <a href="#">111</a> | <a href="#">72</a> |
|    |   |            |                                               |     |                                                                                      |  | <a href="#">159</a> | <a href="#">182</a> | <a href="#">25</a> |
|    |   |            |                                               |     |                                                                                      |  | <a href="#">149</a> | <a href="#">197</a> | <a href="#">25</a> |
|    |   |            |                                               |     |                                                                                      |  | <a href="#">146</a> | <a href="#">162</a> | <a href="#">39</a> |
|    |   |            |                                               |     |                                                                                      |  | <a href="#">172</a> | <a href="#">194</a> | <a href="#">24</a> |
|    |   |            |                                               |     |                                                                                      |  | <a href="#">84</a>  | <a href="#">144</a> | <a href="#">31</a> |
|    |   |            |                                               |     |                                                                                      |  | <a href="#">26</a>  | <a href="#">47</a>  | <a href="#">12</a> |
|    |   |            |                                               |     |                                                                                      |  | <a href="#">201</a> | <a href="#">212</a> | <a href="#">33</a> |
|    |   |            |                                               |     |                                                                                      |  | <a href="#">196</a> | <a href="#">225</a> | <a href="#">33</a> |
|    |   |            |                                               |     |                                                                                      |  | <a href="#">84</a>  | <a href="#">97</a>  | <a href="#">72</a> |
|    |   |            |                                               |     |                                                                                      |  | <a href="#">313</a> | <a href="#">350</a> | <a href="#">22</a> |
|    |   |            |                                               |     |                                                                                      |  | <a href="#">290</a> | <a href="#">311</a> | <a href="#">74</a> |
|    |   |            |                                               |     |                                                                                      |  | <a href="#">56</a>  | <a href="#">69</a>  | <a href="#">21</a> |
|    |   |            |                                               |     |                                                                                      |  | <a href="#">84</a>  | <a href="#">95</a>  | <a href="#">72</a> |
|    |   |            |                                               |     |                                                                                      |  | <a href="#">133</a> | <a href="#">179</a> | <a href="#">25</a> |
|    |   |            |                                               |     |                                                                                      |  | <a href="#">18</a>  | <a href="#">44</a>  | <a href="#">12</a> |
|    |   |            |                                               |     |                                                                                      |  | <a href="#">84</a>  | <a href="#">97</a>  | <a href="#">72</a> |
|    |   |            |                                               |     |                                                                                      |  | <a href="#">128</a> | <a href="#">146</a> | <a href="#">39</a> |
|    |   |            |                                               |     |                                                                                      |  | <a href="#">155</a> | <a href="#">176</a> | <a href="#">24</a> |
|    |   |            |                                               |     |                                                                                      |  | <a href="#">63</a>  | <a href="#">127</a> | <a href="#">31</a> |
|    |   |            |                                               |     |                                                                                      |  | <a href="#">155</a> | <a href="#">169</a> | <a href="#">24</a> |
|    |   |            |                                               |     |                                                                                      |  | <a href="#">182</a> | <a href="#">206</a> | <a href="#">33</a> |
|    |   |            |                                               |     |                                                                                      |  | <a href="#">257</a> | <a href="#">269</a> | <a href="#">14</a> |
|    |   |            |                                               |     |                                                                                      |  | <a href="#">64</a>  | <a href="#">77</a>  | <a href="#">72</a> |
|    |   |            |                                               |     |                                                                                      |  | <a href="#">134</a> | <a href="#">146</a> | <a href="#">39</a> |
|    |   |            |                                               |     |                                                                                      |  | <a href="#">271</a> | <a href="#">280</a> | <a href="#">74</a> |
|    |   |            |                                               |     |                                                                                      |  | <a href="#">40</a>  | <a href="#">53</a>  | <a href="#">21</a> |
|    |   |            |                                               |     |                                                                                      |  | <a href="#">258</a> | <a href="#">269</a> | <a href="#">14</a> |
|    |   |            |                                               |     |                                                                                      |  | <a href="#">66</a>  | <a href="#">78</a>  | <a href="#">72</a> |
|    |   |            |                                               |     |                                                                                      |  | <a href="#">114</a> | <a href="#">163</a> | <a href="#">25</a> |
|    |   |            |                                               |     |                                                                                      |  | <a href="#">144</a> | <a href="#">161</a> | <a href="#">39</a> |
|    |   |            |                                               |     |                                                                                      |  | <a href="#">171</a> | <a href="#">193</a> | <a href="#">24</a> |
| 37 | C | PVX_003485 | variable surface<br>protein Vir4,<br>putative | 329 |    |  |                     |                     |                    |
| 38 | C | PVX_096000 | variable surface<br>protein Vir4,<br>putative | 353 |  |  |                     |                     |                    |
| 39 | C | PVX_005580 | variable surface<br>protein Vir4,<br>putative | 297 |  |  |                     |                     |                    |
| 40 | C | PVX_105700 | variable surface<br>protein Vir32/4,          | 340 |  |  |                     |                     |                    |

|    |   |            |                                          |     |                                                                                      |                                                                                    |     |     |    |
|----|---|------------|------------------------------------------|-----|--------------------------------------------------------------------------------------|------------------------------------------------------------------------------------|-----|-----|----|
|    |   |            | putative                                 |     |                                                                                      | 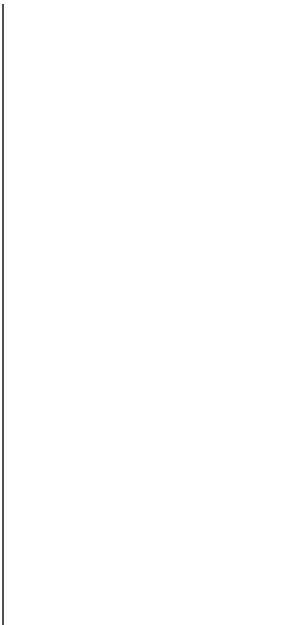 | 81  | 143 | 31 |
|    |   |            |                                          |     |                                                                                      |                                                                                    | 24  | 47  | 12 |
|    |   |            |                                          |     |                                                                                      |                                                                                    | 197 | 224 | 33 |
|    |   |            |                                          |     |                                                                                      |                                                                                    | 267 | 278 | 14 |
|    |   |            |                                          |     |                                                                                      |                                                                                    | 84  | 94  | 72 |
|    |   |            |                                          |     |                                                                                      |                                                                                    | 287 | 298 | 74 |
|    |   |            |                                          |     |                                                                                      |                                                                                    | 303 | 337 | 22 |
|    |   |            |                                          |     |                                                                                      |                                                                                    | 188 | 223 | 46 |
|    |   |            |                                          |     |                                                                                      |                                                                                    | 306 | 329 | 22 |
|    |   |            |                                          |     |                                                                                      |                                                                                    | 280 | 300 | 74 |
|    |   |            |                                          |     |                                                                                      |                                                                                    | 188 | 223 | 46 |
|    |   |            |                                          |     |                                                                                      |                                                                                    | 332 | 340 | 17 |
|    |   |            |                                          |     |                                                                                      |                                                                                    | 262 | 278 | 14 |
|    |   |            |                                          |     |                                                                                      |                                                                                    | 84  | 94  | 72 |
|    |   |            |                                          |     |                                                                                      |                                                                                    | 82  | 96  | 72 |
|    |   |            |                                          |     |                                                                                      |                                                                                    | 130 | 173 | 25 |
| 41 | C | PVX_051690 | variable surface protein Vir32, putative | 334 |   |                                                                                    | 146 | 163 | 39 |
|    |   |            |                                          |     |                                                                                      |                                                                                    | 173 | 194 | 24 |
|    |   |            |                                          |     |                                                                                      |                                                                                    | 80  | 145 | 31 |
|    |   |            |                                          |     |                                                                                      |                                                                                    | 23  | 49  | 12 |
|    |   |            |                                          |     |                                                                                      |                                                                                    | 205 | 215 | 33 |
|    |   |            |                                          |     |                                                                                      |                                                                                    | 200 | 225 | 33 |
|    |   |            |                                          |     |                                                                                      |                                                                                    | 266 | 279 | 14 |
|    |   |            |                                          |     |                                                                                      |                                                                                    | 84  | 95  | 72 |
|    |   |            |                                          |     |                                                                                      |                                                                                    | 288 | 299 | 74 |
|    |   |            |                                          |     |                                                                                      |                                                                                    | 304 | 332 | 22 |
|    |   |            |                                          |     |                                                                                      |                                                                                    | 152 | 166 | 39 |
|    |   |            |                                          |     |                                                                                      |                                                                                    | 190 | 224 | 46 |
|    |   |            |                                          |     |                                                                                      |                                                                                    | 307 | 333 | 22 |
|    |   |            |                                          |     |                                                                                      |                                                                                    | 281 | 302 | 74 |
|    |   |            |                                          |     |                                                                                      |                                                                                    | 190 | 224 | 46 |
|    |   |            |                                          |     |                                                                                      |                                                                                    | 264 | 280 | 14 |
|    |   |            |                                          |     |                                                                                      |                                                                                    | 84  | 96  | 72 |
|    |   |            |                                          |     |                                                                                      |                                                                                    | 82  | 93  | 72 |
| 42 | C | PVX_061190 | variable surface protein Vir32, putative | 342 |  |                                                                                    | 145 | 163 | 39 |
|    |   |            |                                          |     |                                                                                      |                                                                                    | 172 | 193 | 24 |
|    |   |            |                                          |     |                                                                                      |                                                                                    | 80  | 139 | 31 |
|    |   |            |                                          |     |                                                                                      |                                                                                    | 202 | 214 | 33 |
|    |   |            |                                          |     |                                                                                      |                                                                                    | 197 | 226 | 33 |
|    |   |            |                                          |     |                                                                                      |                                                                                    | 268 | 278 | 14 |
|    |   |            |                                          |     |                                                                                      |                                                                                    | 83  | 95  | 72 |
|    |   |            |                                          |     |                                                                                      |                                                                                    | 303 | 339 | 22 |
|    |   |            |                                          |     |                                                                                      |                                                                                    | 151 | 163 | 39 |
|    |   |            |                                          |     |                                                                                      |                                                                                    | 189 | 223 | 46 |
|    |   |            |                                          |     |                                                                                      |                                                                                    | 305 | 332 | 22 |



|    |   |            |                                                     |     |                                                                                      |                     |                     |                    |
|----|---|------------|-----------------------------------------------------|-----|--------------------------------------------------------------------------------------|---------------------|---------------------|--------------------|
|    |   |            |                                                     |     |                                                                                      | <a href="#">171</a> | <a href="#">192</a> | <a href="#">24</a> |
|    |   |            |                                                     |     |                                                                                      | <a href="#">50</a>  | <a href="#">74</a>  | <a href="#">21</a> |
|    |   |            |                                                     |     |                                                                                      | <a href="#">79</a>  | <a href="#">143</a> | <a href="#">31</a> |
|    |   |            |                                                     |     |                                                                                      | <a href="#">171</a> | <a href="#">184</a> | <a href="#">24</a> |
|    |   |            |                                                     |     |                                                                                      | <a href="#">196</a> | <a href="#">228</a> | <a href="#">33</a> |
|    |   |            |                                                     |     |                                                                                      | <a href="#">279</a> | <a href="#">290</a> | <a href="#">74</a> |
|    |   |            |                                                     |     |                                                                                      | <a href="#">296</a> | <a href="#">332</a> | <a href="#">22</a> |
|    |   |            |                                                     |     |                                                                                      | <a href="#">298</a> | <a href="#">324</a> | <a href="#">22</a> |
|    |   |            |                                                     |     |                                                                                      | <a href="#">272</a> | <a href="#">293</a> | <a href="#">74</a> |
|    |   |            |                                                     |     |                                                                                      | <a href="#">327</a> | <a href="#">335</a> | <a href="#">17</a> |
|    |   |            |                                                     |     |                                                                                      | <a href="#">55</a>  | <a href="#">69</a>  | <a href="#">21</a> |
|    |   |            |                                                     |     |                                                                                      | <a href="#">256</a> | <a href="#">268</a> | <a href="#">14</a> |
|    |   |            |                                                     |     |                                                                                      | <a href="#">82</a>  | <a href="#">91</a>  | <a href="#">72</a> |
|    |   |            |                                                     |     |                                                                                      | <a href="#">17</a>  | <a href="#">44</a>  | <a href="#">12</a> |
| 46 | C | PVX_175270 | variable surface protein Vir14, truncated, putative | 332 |  | <a href="#">129</a> | <a href="#">142</a> | <a href="#">39</a> |
|    |   |            |                                                     |     |                                                                                      | <a href="#">156</a> | <a href="#">178</a> | <a href="#">24</a> |
|    |   |            |                                                     |     |                                                                                      | <a href="#">35</a>  | <a href="#">59</a>  | <a href="#">21</a> |
|    |   |            |                                                     |     |                                                                                      | <a href="#">64</a>  | <a href="#">128</a> | <a href="#">31</a> |
|    |   |            |                                                     |     |                                                                                      | <a href="#">282</a> | <a href="#">302</a> | <a href="#">15</a> |
|    |   |            |                                                     |     |                                                                                      | <a href="#">156</a> | <a href="#">170</a> | <a href="#">24</a> |
|    |   |            |                                                     |     |                                                                                      | <a href="#">182</a> | <a href="#">212</a> | <a href="#">33</a> |
|    |   |            |                                                     |     |                                                                                      | <a href="#">255</a> | <a href="#">269</a> | <a href="#">14</a> |
|    |   |            |                                                     |     |                                                                                      | <a href="#">67</a>  | <a href="#">79</a>  | <a href="#">72</a> |
|    |   |            |                                                     |     |                                                                                      | <a href="#">294</a> | <a href="#">329</a> | <a href="#">22</a> |
|    |   |            |                                                     |     |                                                                                      | <a href="#">173</a> | <a href="#">207</a> | <a href="#">46</a> |
|    |   |            |                                                     |     |                                                                                      | <a href="#">297</a> | <a href="#">323</a> | <a href="#">22</a> |
|    |   |            |                                                     |     |                                                                                      | <a href="#">271</a> | <a href="#">291</a> | <a href="#">74</a> |
|    |   |            |                                                     |     |                                                                                      | <a href="#">173</a> | <a href="#">207</a> | <a href="#">46</a> |
|    |   |            |                                                     |     |                                                                                      | <a href="#">324</a> | <a href="#">332</a> | <a href="#">17</a> |
|    |   |            |                                                     |     |                                                                                      | <a href="#">256</a> | <a href="#">270</a> | <a href="#">14</a> |
|    |   |            |                                                     |     |                                                                                      | <a href="#">67</a>  | <a href="#">78</a>  | <a href="#">72</a> |
|    |   |            |                                                     |     |                                                                                      | <a href="#">123</a> | <a href="#">163</a> | <a href="#">25</a> |
|    |   |            |                                                     |     |                                                                                      | <a href="#">2</a>   | <a href="#">29</a>  | <a href="#">12</a> |
| 47 | C | PVX_184285 | variable surface protein Vir4, putative             | 348 |  | <a href="#">148</a> | <a href="#">166</a> | <a href="#">39</a> |
|    |   |            |                                                     |     |                                                                                      | <a href="#">175</a> | <a href="#">196</a> | <a href="#">24</a> |
|    |   |            |                                                     |     |                                                                                      | <a href="#">83</a>  | <a href="#">147</a> | <a href="#">31</a> |
|    |   |            |                                                     |     |                                                                                      | <a href="#">236</a> | <a href="#">259</a> | <a href="#">6</a>  |
|    |   |            |                                                     |     |                                                                                      | <a href="#">236</a> | <a href="#">260</a> | <a href="#">6</a>  |
|    |   |            |                                                     |     |                                                                                      | <a href="#">175</a> | <a href="#">189</a> | <a href="#">24</a> |
|    |   |            |                                                     |     |                                                                                      | <a href="#">204</a> | <a href="#">215</a> | <a href="#">33</a> |
|    |   |            |                                                     |     |                                                                                      | <a href="#">202</a> | <a href="#">225</a> | <a href="#">33</a> |
|    |   |            |                                                     |     |                                                                                      | <a href="#">84</a>  | <a href="#">97</a>  | <a href="#">72</a> |
|    |   |            |                                                     |     |                                                                                      | <a href="#">309</a> | <a href="#">345</a> | <a href="#">22</a> |
|    |   |            |                                                     |     |                                                                                      | <a href="#">311</a> | <a href="#">338</a> | <a href="#">22</a> |
|    |   |            |                                                     |     |                                                                                      | <a href="#">285</a> | <a href="#">306</a> | <a href="#">74</a> |





|    |             |            |                                                      |     |                                                                                      |                     |                     |                    |
|----|-------------|------------|------------------------------------------------------|-----|--------------------------------------------------------------------------------------|---------------------|---------------------|--------------------|
|    |             |            |                                                      |     |                                                                                      | <a href="#">85</a>  | <a href="#">96</a>  | <a href="#">72</a> |
|    |             |            |                                                      |     |                                                                                      | <a href="#">330</a> | <a href="#">360</a> | <a href="#">22</a> |
|    |             |            |                                                      |     |                                                                                      | <a href="#">201</a> | <a href="#">224</a> | <a href="#">46</a> |
|    |             |            |                                                      |     |                                                                                      | <a href="#">333</a> | <a href="#">349</a> | <a href="#">22</a> |
|    |             |            |                                                      |     |                                                                                      | <a href="#">301</a> | <a href="#">322</a> | <a href="#">74</a> |
|    |             |            |                                                      |     |                                                                                      | <a href="#">355</a> | <a href="#">361</a> | <a href="#">17</a> |
|    |             |            |                                                      |     |                                                                                      | <a href="#">53</a>  | <a href="#">76</a>  | <a href="#">21</a> |
|    |             |            |                                                      |     |                                                                                      | <a href="#">286</a> | <a href="#">299</a> | <a href="#">14</a> |
|    |             |            |                                                      |     |                                                                                      | <a href="#">85</a>  | <a href="#">96</a>  | <a href="#">72</a> |
| 51 | Unavailable | PVX_159260 | variable surface protein Vir14, pseudogene, putative | 541 |   | <a href="#">297</a> | <a href="#">315</a> | <a href="#">39</a> |
|    |             |            |                                                      |     |                                                                                      | <a href="#">208</a> | <a href="#">227</a> | <a href="#">21</a> |
|    |             |            |                                                      |     |                                                                                      | <a href="#">232</a> | <a href="#">296</a> | <a href="#">31</a> |
|    |             |            |                                                      |     |                                                                                      | <a href="#">392</a> | <a href="#">420</a> | <a href="#">6</a>  |
|    |             |            |                                                      |     |                                                                                      | <a href="#">390</a> | <a href="#">420</a> | <a href="#">6</a>  |
|    |             |            |                                                      |     |                                                                                      | <a href="#">324</a> | <a href="#">338</a> | <a href="#">24</a> |
|    |             |            |                                                      |     |                                                                                      | <a href="#">382</a> | <a href="#">420</a> | <a href="#">6</a>  |
|    |             |            |                                                      |     |                                                                                      | <a href="#">349</a> | <a href="#">378</a> | <a href="#">33</a> |
|    |             |            |                                                      |     |                                                                                      | <a href="#">424</a> | <a href="#">436</a> | <a href="#">14</a> |
|    |             |            |                                                      |     |                                                                                      | <a href="#">235</a> | <a href="#">247</a> | <a href="#">72</a> |
|    |             |            |                                                      |     |                                                                                      | <a href="#">501</a> | <a href="#">538</a> | <a href="#">22</a> |
|    |             |            |                                                      |     |                                                                                      | <a href="#">341</a> | <a href="#">375</a> | <a href="#">46</a> |
|    |             |            |                                                      |     |                                                                                      | <a href="#">504</a> | <a href="#">531</a> | <a href="#">22</a> |
|    |             |            |                                                      |     |                                                                                      | <a href="#">438</a> | <a href="#">447</a> | <a href="#">74</a> |
|    |             |            |                                                      |     |                                                                                      | <a href="#">484</a> | <a href="#">499</a> | <a href="#">74</a> |
|    |             |            |                                                      |     |                                                                                      | <a href="#">341</a> | <a href="#">375</a> | <a href="#">46</a> |
|    |             |            |                                                      |     |                                                                                      | <a href="#">391</a> | <a href="#">420</a> | <a href="#">6</a>  |
|    |             |            |                                                      |     |                                                                                      | <a href="#">533</a> | <a href="#">541</a> | <a href="#">17</a> |
|    |             |            |                                                      |     |                                                                                      | <a href="#">390</a> | <a href="#">420</a> | <a href="#">6</a>  |
|    |             |            |                                                      |     |                                                                                      | <a href="#">235</a> | <a href="#">246</a> | <a href="#">72</a> |
|    |             |            |                                                      |     |                                                                                      | <a href="#">292</a> | <a href="#">331</a> | <a href="#">25</a> |
|    |             |            |                                                      |     |                                                                                      | <a href="#">169</a> | <a href="#">196</a> | <a href="#">12</a> |
|    |             |            |                                                      |     |                                                                                      | <a href="#">123</a> | <a href="#">138</a> | <a href="#">39</a> |
|    |             |            |                                                      |     |                                                                                      | <a href="#">150</a> | <a href="#">172</a> | <a href="#">24</a> |
|    |             |            |                                                      |     |                                                                                      | <a href="#">29</a>  | <a href="#">52</a>  | <a href="#">21</a> |
|    |             |            |                                                      |     |                                                                                      | <a href="#">57</a>  | <a href="#">122</a> | <a href="#">31</a> |
|    |             |            |                                                      |     |                                                                                      | <a href="#">226</a> | <a href="#">246</a> | <a href="#">6</a>  |
|    |             |            |                                                      |     |                                                                                      | <a href="#">225</a> | <a href="#">246</a> | <a href="#">6</a>  |
|    |             |            |                                                      |     |                                                                                      | <a href="#">150</a> | <a href="#">164</a> | <a href="#">24</a> |
|    |             |            |                                                      |     |                                                                                      | <a href="#">210</a> | <a href="#">246</a> | <a href="#">6</a>  |
|    |             |            |                                                      |     |                                                                                      | <a href="#">180</a> | <a href="#">191</a> | <a href="#">33</a> |
|    |             |            |                                                      |     |                                                                                      | <a href="#">175</a> | <a href="#">204</a> | <a href="#">33</a> |
|    |             |            |                                                      |     |                                                                                      | <a href="#">248</a> | <a href="#">262</a> | <a href="#">14</a> |
|    |             |            |                                                      |     |                                                                                      | <a href="#">287</a> | <a href="#">322</a> | <a href="#">22</a> |
|    |             |            |                                                      |     |                                                                                      | <a href="#">167</a> | <a href="#">200</a> | <a href="#">46</a> |
|    |             |            |                                                      |     |                                                                                      | <a href="#">290</a> | <a href="#">316</a> | <a href="#">22</a> |
| 52 | C           | PVX_030190 | variable surface protein Vir14, truncated, putative  | 325 |  |                     |                     |                    |





|    |               |            |                                                                                 |     |                                                                                      |  |                     |                     |                    |
|----|---------------|------------|---------------------------------------------------------------------------------|-----|--------------------------------------------------------------------------------------|--|---------------------|---------------------|--------------------|
|    |               |            |                                                                                 |     |                                                                                      |  | <a href="#">157</a> | <a href="#">180</a> | <a href="#">40</a> |
|    |               |            |                                                                                 |     |                                                                                      |  | <a href="#">189</a> | <a href="#">220</a> | <a href="#">33</a> |
|    |               |            |                                                                                 |     |                                                                                      |  | <a href="#">78</a>  | <a href="#">90</a>  | <a href="#">72</a> |
|    |               |            |                                                                                 |     |                                                                                      |  | <a href="#">278</a> | <a href="#">312</a> | <a href="#">22</a> |
|    |               |            |                                                                                 |     |                                                                                      |  | <a href="#">255</a> | <a href="#">275</a> | <a href="#">74</a> |
|    |               |            |                                                                                 |     |                                                                                      |  | <a href="#">123</a> | <a href="#">169</a> | <a href="#">25</a> |
| 59 | C             | PVX_101560 | variable surface protein<br>Vir4-related                                        | 302 | 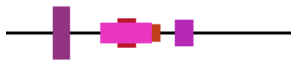   |  | <a href="#">119</a> | <a href="#">137</a> | <a href="#">39</a> |
|    |               |            |                                                                                 |     |                                                                                      |  | <a href="#">146</a> | <a href="#">163</a> | <a href="#">24</a> |
|    |               |            |                                                                                 |     |                                                                                      |  | <a href="#">146</a> | <a href="#">161</a> | <a href="#">24</a> |
|    |               |            |                                                                                 |     |                                                                                      |  | <a href="#">179</a> | <a href="#">197</a> | <a href="#">33</a> |
|    |               |            |                                                                                 |     |                                                                                      |  | <a href="#">50</a>  | <a href="#">67</a>  | <a href="#">72</a> |
|    |               |            |                                                                                 |     |                                                                                      |  | <a href="#">100</a> | <a href="#">153</a> | <a href="#">25</a> |
| 60 | Unavailable   | PVX_046190 | variable surface protein Vir32,<br>putative;<br>Truncated due to end of contig. | 353 |    |  | <a href="#">142</a> | <a href="#">161</a> | <a href="#">24</a> |
|    |               |            |                                                                                 |     |                                                                                      |  | <a href="#">168</a> | <a href="#">180</a> | <a href="#">33</a> |
|    |               |            |                                                                                 |     |                                                                                      |  | <a href="#">166</a> | <a href="#">191</a> | <a href="#">33</a> |
|    |               |            |                                                                                 |     |                                                                                      |  | <a href="#">240</a> | <a href="#">247</a> | <a href="#">14</a> |
|    |               |            |                                                                                 |     |                                                                                      |  | <a href="#">249</a> | <a href="#">258</a> | <a href="#">74</a> |
| 61 | C             | PVX_096945 | variable surface protein<br>Vir4-related                                        | 314 |   |  | <a href="#">25</a>  | <a href="#">38</a>  | <a href="#">72</a> |
|    |               |            |                                                                                 |     |                                                                                      |  | <a href="#">21</a>  | <a href="#">82</a>  | <a href="#">31</a> |
|    |               |            |                                                                                 |     |                                                                                      |  | <a href="#">133</a> | <a href="#">159</a> | <a href="#">33</a> |
|    |               |            |                                                                                 |     |                                                                                      |  | <a href="#">20</a>  | <a href="#">32</a>  | <a href="#">72</a> |
|    |               |            |                                                                                 |     |                                                                                      |  | <a href="#">21</a>  | <a href="#">29</a>  | <a href="#">21</a> |
|    |               |            |                                                                                 |     |                                                                                      |  | <a href="#">24</a>  | <a href="#">32</a>  | <a href="#">72</a> |
| 62 | Not clustered | PVX_086875 | variable surface protein Vir27-related                                          | 292 |  |  | <a href="#">265</a> | <a href="#">285</a> | <a href="#">9</a>  |
|    |               |            |                                                                                 |     |                                                                                      |  | <a href="#">265</a> | <a href="#">285</a> | <a href="#">9</a>  |
|    |               |            |                                                                                 |     |                                                                                      |  | <a href="#">134</a> | <a href="#">161</a> | <a href="#">12</a> |
|    |               |            |                                                                                 |     |                                                                                      |  | <a href="#">266</a> | <a href="#">285</a> | <a href="#">9</a>  |
| 63 |               | PVX_005575 | hypothetical protein                                                            | 138 |                                                                                      |  |                     |                     |                    |
| 1  | Not clustered | PVX_056190 | variable surface protein<br>Vir6-related                                        | 407 |  |  | <a href="#">123</a> | <a href="#">165</a> | <a href="#">40</a> |
|    |               |            |                                                                                 |     |                                                                                      |  | <a href="#">123</a> | <a href="#">151</a> | <a href="#">40</a> |
|    |               |            |                                                                                 |     |                                                                                      |  | <a href="#">10</a>  | <a href="#">110</a> | <a href="#">21</a> |
|    |               |            |                                                                                 |     |                                                                                      |  | <a href="#">370</a> | <a href="#">400</a> | <a href="#">29</a> |
| 2  | Unavailable   | PVX_014125 | variable surface protein Vir6-like,<br>pseudogene                               | 523 |  |  | <a href="#">182</a> | <a href="#">224</a> | <a href="#">40</a> |
|    |               |            |                                                                                 |     |                                                                                      |  | <a href="#">183</a> | <a href="#">199</a> | <a href="#">40</a> |
|    |               |            |                                                                                 |     |                                                                                      |  | <a href="#">398</a> | <a href="#">428</a> | <a href="#">29</a> |
| 3  |               | PVX_060190 | hypothetical protein                                                            | 84  |  |  | <a href="#">1</a>   | <a href="#">16</a>  | <a href="#">29</a> |
| 4  | Not clustered | PVX_070190 | variable surface protein Vir28,<br>truncated,<br>putative                       | 182 |  |  | <a href="#">83</a>  | <a href="#">114</a> | <a href="#">29</a> |
| 5  | Not clustered | PVX_106210 | variable surface protein Vir6,<br>putative                                      | 434 |  |  | <a href="#">79</a>  | <a href="#">89</a>  | <a href="#">72</a> |
|    |               |            |                                                                                 |     |                                                                                      |  | <a href="#">10</a>  | <a href="#">109</a> | <a href="#">21</a> |
|    |               |            |                                                                                 |     |                                                                                      |  | <a href="#">356</a> | <a href="#">386</a> | <a href="#">29</a> |
| 6  | G             | PVX_050690 | variable surface                                                                | 405 |  |  | <a href="#">46</a>  | <a href="#">59</a>  | <a href="#">21</a> |



|                     |                     |                    |                                          |     |                                                                                      |                     |                     |                    |
|---------------------|---------------------|--------------------|------------------------------------------|-----|--------------------------------------------------------------------------------------|---------------------|---------------------|--------------------|
|                     |                     |                    |                                          |     |                                                                                      | <a href="#">422</a> | <a href="#">445</a> | <a href="#">21</a> |
|                     |                     |                    |                                          |     |                                                                                      | <a href="#">365</a> | <a href="#">395</a> | <a href="#">29</a> |
| 10                  | Not clustered       | PVX_028690         | variable surface protein Vir6, putative  | 464 | 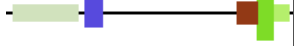   | <a href="#">86</a>  | <a href="#">95</a>  | <a href="#">21</a> |
|                     |                     |                    |                                          |     |                                                                                      | <a href="#">81</a>  | <a href="#">95</a>  | <a href="#">21</a> |
|                     |                     |                    |                                          |     |                                                                                      | <a href="#">407</a> | <a href="#">433</a> | <a href="#">74</a> |
|                     |                     |                    |                                          |     |                                                                                      | <a href="#">86</a>  | <a href="#">95</a>  | <a href="#">21</a> |
|                     |                     |                    |                                          |     |                                                                                      | <a href="#">86</a>  | <a href="#">95</a>  | <a href="#">21</a> |
|                     |                     |                    |                                          |     |                                                                                      | <a href="#">128</a> | <a href="#">156</a> | <a href="#">40</a> |
|                     |                     |                    |                                          |     |                                                                                      | <a href="#">86</a>  | <a href="#">95</a>  | <a href="#">21</a> |
|                     |                     |                    |                                          |     |                                                                                      | <a href="#">86</a>  | <a href="#">94</a>  | <a href="#">21</a> |
|                     |                     |                    |                                          |     |                                                                                      | <a href="#">12</a>  | <a href="#">116</a> | <a href="#">21</a> |
|                     |                     |                    |                                          |     |                                                                                      | <a href="#">435</a> | <a href="#">458</a> | <a href="#">21</a> |
|                     |                     |                    |                                          |     |                                                                                      | <a href="#">375</a> | <a href="#">406</a> | <a href="#">29</a> |
| 11                  | G                   | PVX_103670         | variable surface protein Vir6-like       | 459 |    | <a href="#">79</a>  | <a href="#">89</a>  | <a href="#">21</a> |
|                     |                     |                    |                                          |     |                                                                                      | <a href="#">76</a>  | <a href="#">87</a>  | <a href="#">21</a> |
|                     |                     |                    |                                          |     |                                                                                      | <a href="#">402</a> | <a href="#">428</a> | <a href="#">74</a> |
|                     |                     |                    |                                          |     |                                                                                      | <a href="#">79</a>  | <a href="#">89</a>  | <a href="#">21</a> |
|                     |                     |                    |                                          |     |                                                                                      | <a href="#">50</a>  | <a href="#">71</a>  | <a href="#">7</a>  |
|                     |                     |                    |                                          |     |                                                                                      | <a href="#">79</a>  | <a href="#">89</a>  | <a href="#">21</a> |
|                     |                     |                    |                                          |     |                                                                                      | <a href="#">123</a> | <a href="#">150</a> | <a href="#">40</a> |
|                     |                     |                    |                                          |     |                                                                                      | <a href="#">50</a>  | <a href="#">74</a>  | <a href="#">7</a>  |
|                     |                     |                    |                                          |     |                                                                                      | <a href="#">79</a>  | <a href="#">89</a>  | <a href="#">21</a> |
|                     |                     |                    |                                          |     |                                                                                      | <a href="#">78</a>  | <a href="#">87</a>  | <a href="#">21</a> |
|                     |                     |                    |                                          |     |                                                                                      | <a href="#">430</a> | <a href="#">452</a> | <a href="#">21</a> |
| <a href="#">375</a> | <a href="#">401</a> | <a href="#">29</a> |                                          |     |                                                                                      |                     |                     |                    |
| 12                  | G                   | PVX_007585         | variable surface protein Vir28, putative | 447 |  | <a href="#">79</a>  | <a href="#">91</a>  | <a href="#">21</a> |
|                     |                     |                    |                                          |     |                                                                                      | <a href="#">420</a> | <a href="#">446</a> | <a href="#">8</a>  |
|                     |                     |                    |                                          |     |                                                                                      | <a href="#">419</a> | <a href="#">446</a> | <a href="#">8</a>  |
|                     |                     |                    |                                          |     |                                                                                      | <a href="#">76</a>  | <a href="#">87</a>  | <a href="#">21</a> |
|                     |                     |                    |                                          |     |                                                                                      | <a href="#">391</a> | <a href="#">413</a> | <a href="#">74</a> |
|                     |                     |                    |                                          |     |                                                                                      | <a href="#">79</a>  | <a href="#">91</a>  | <a href="#">21</a> |
|                     |                     |                    |                                          |     |                                                                                      | <a href="#">50</a>  | <a href="#">72</a>  | <a href="#">7</a>  |
|                     |                     |                    |                                          |     |                                                                                      | <a href="#">79</a>  | <a href="#">91</a>  | <a href="#">21</a> |
|                     |                     |                    |                                          |     |                                                                                      | <a href="#">390</a> | <a href="#">405</a> | <a href="#">74</a> |
|                     |                     |                    |                                          |     |                                                                                      | <a href="#">125</a> | <a href="#">152</a> | <a href="#">40</a> |
|                     |                     |                    |                                          |     |                                                                                      | <a href="#">50</a>  | <a href="#">74</a>  | <a href="#">7</a>  |
| <a href="#">79</a>  | <a href="#">91</a>  | <a href="#">21</a> |                                          |     |                                                                                      |                     |                     |                    |
| <a href="#">77</a>  | <a href="#">87</a>  | <a href="#">21</a> |                                          |     |                                                                                      |                     |                     |                    |
| <a href="#">11</a>  | <a href="#">111</a> | <a href="#">21</a> |                                          |     |                                                                                      |                     |                     |                    |
| <a href="#">365</a> | <a href="#">389</a> | <a href="#">29</a> |                                          |     |                                                                                      |                     |                     |                    |
| 13                  | Not clustered       | PVX_063690         | variable surface protein Vir6-like       | 456 |  | <a href="#">401</a> | <a href="#">427</a> | <a href="#">74</a> |
|                     |                     |                    |                                          |     |                                                                                      | <a href="#">126</a> | <a href="#">182</a> | <a href="#">40</a> |
|                     |                     |                    |                                          |     |                                                                                      | <a href="#">11</a>  | <a href="#">111</a> | <a href="#">21</a> |
|                     |                     |                    |                                          |     |                                                                                      | <a href="#">429</a> | <a href="#">452</a> | <a href="#">21</a> |
|                     |                     |                    |                                          |     |                                                                                      | <a href="#">375</a> | <a href="#">400</a> | <a href="#">29</a> |

|    |               |            |                                                    |     |  |                     |                     |                    |
|----|---------------|------------|----------------------------------------------------|-----|--|---------------------|---------------------|--------------------|
| 14 | Not clustered | PVX_121345 | variable surface protein Vir6, putative            | 449 |  | <a href="#">394</a> | <a href="#">420</a> | <a href="#">74</a> |
|    |               |            |                                                    |     |  | <a href="#">125</a> | <a href="#">179</a> | <a href="#">40</a> |
|    |               |            |                                                    |     |  | <a href="#">422</a> | <a href="#">445</a> | <a href="#">21</a> |
|    |               |            |                                                    |     |  | <a href="#">370</a> | <a href="#">393</a> | <a href="#">29</a> |
|    |               |            |                                                    |     |  | <a href="#">403</a> | <a href="#">429</a> | <a href="#">74</a> |
| 15 | G             | PVX_026690 | variable surface protein Vir6, putative            | 460 |  | <a href="#">121</a> | <a href="#">151</a> | <a href="#">40</a> |
|    |               |            |                                                    |     |  | <a href="#">121</a> | <a href="#">147</a> | <a href="#">40</a> |
|    |               |            |                                                    |     |  | <a href="#">75</a>  | <a href="#">84</a>  | <a href="#">21</a> |
|    |               |            |                                                    |     |  | <a href="#">12</a>  | <a href="#">108</a> | <a href="#">21</a> |
|    |               |            |                                                    |     |  | <a href="#">434</a> | <a href="#">452</a> | <a href="#">21</a> |
|    |               |            |                                                    |     |  | <a href="#">376</a> | <a href="#">401</a> | <a href="#">29</a> |
| 16 | G             | PVX_071190 | variable surface protein Vir28-related             | 437 |  | <a href="#">388</a> | <a href="#">406</a> | <a href="#">74</a> |
|    |               |            |                                                    |     |  | <a href="#">124</a> | <a href="#">180</a> | <a href="#">40</a> |
|    |               |            |                                                    |     |  | <a href="#">124</a> | <a href="#">152</a> | <a href="#">40</a> |
|    |               |            |                                                    |     |  | <a href="#">78</a>  | <a href="#">84</a>  | <a href="#">6</a>  |
|    |               |            |                                                    |     |  | <a href="#">11</a>  | <a href="#">110</a> | <a href="#">21</a> |
|    |               |            |                                                    |     |  | <a href="#">411</a> | <a href="#">431</a> | <a href="#">21</a> |
|    |               |            |                                                    |     |  | <a href="#">362</a> | <a href="#">387</a> | <a href="#">29</a> |
| 17 |               | PVX_108255 | hypothetical protein                               | 442 |  | <a href="#">387</a> | <a href="#">413</a> | <a href="#">74</a> |
|    |               |            |                                                    |     |  | <a href="#">46</a>  | <a href="#">66</a>  | <a href="#">7</a>  |
|    |               |            |                                                    |     |  | <a href="#">120</a> | <a href="#">162</a> | <a href="#">40</a> |
|    |               |            |                                                    |     |  | <a href="#">120</a> | <a href="#">148</a> | <a href="#">40</a> |
|    |               |            |                                                    |     |  | <a href="#">46</a>  | <a href="#">69</a>  | <a href="#">7</a>  |
|    |               |            |                                                    |     |  | <a href="#">7</a>   | <a href="#">107</a> | <a href="#">21</a> |
|    |               |            |                                                    |     |  | <a href="#">415</a> | <a href="#">438</a> | <a href="#">21</a> |
|    |               |            |                                                    |     |  | <a href="#">355</a> | <a href="#">386</a> | <a href="#">29</a> |
| 18 | Not clustered | PVX_029690 | variable surface protein Vir6, putative            | 399 |  | <a href="#">100</a> | <a href="#">179</a> | <a href="#">40</a> |
|    |               |            |                                                    |     |  | <a href="#">352</a> | <a href="#">370</a> | <a href="#">74</a> |
|    |               |            |                                                    |     |  | <a href="#">93</a>  | <a href="#">134</a> | <a href="#">40</a> |
|    |               |            |                                                    |     |  | <a href="#">93</a>  | <a href="#">122</a> | <a href="#">40</a> |
|    |               |            |                                                    |     |  | <a href="#">10</a>  | <a href="#">94</a>  | <a href="#">21</a> |
|    |               |            |                                                    |     |  | <a href="#">372</a> | <a href="#">395</a> | <a href="#">21</a> |
| 19 | G             | PVX_035190 | variable surface protein Vir6, truncated, putative | 410 |  | <a href="#">71</a>  | <a href="#">172</a> | <a href="#">40</a> |
|    |               |            |                                                    |     |  | <a href="#">34</a>  | <a href="#">44</a>  | <a href="#">21</a> |
|    |               |            |                                                    |     |  | <a href="#">355</a> | <a href="#">381</a> | <a href="#">74</a> |
|    |               |            |                                                    |     |  | <a href="#">354</a> | <a href="#">368</a> | <a href="#">74</a> |
|    |               |            |                                                    |     |  | <a href="#">77</a>  | <a href="#">105</a> | <a href="#">40</a> |
|    |               |            |                                                    |     |  | <a href="#">4</a>   | <a href="#">66</a>  | <a href="#">21</a> |
|    |               |            |                                                    |     |  | <a href="#">383</a> | <a href="#">406</a> | <a href="#">21</a> |
|    |               |            |                                                    |     |  | <a href="#">324</a> | <a href="#">354</a> | <a href="#">29</a> |
| 20 | Not clustered | PVX_073190 | variable surface protein Vir6-like                 | 492 |  | <a href="#">124</a> | <a href="#">210</a> | <a href="#">40</a> |
|    |               |            |                                                    |     |  | <a href="#">78</a>  | <a href="#">85</a>  | <a href="#">21</a> |
|    |               |            |                                                    |     |  | <a href="#">436</a> | <a href="#">462</a> | <a href="#">74</a> |
|    |               |            |                                                    |     |  | <a href="#">123</a> | <a href="#">150</a> | <a href="#">40</a> |
|    |               |            |                                                    |     |  | <a href="#">10</a>  | <a href="#">111</a> | <a href="#">21</a> |

|    |               |            |                                                    |     |                                                                                      |  |                     |                     |                    |
|----|---------------|------------|----------------------------------------------------|-----|--------------------------------------------------------------------------------------|--|---------------------|---------------------|--------------------|
|    |               |            |                                                    |     |                                                                                      |  | <a href="#">464</a> | <a href="#">486</a> | <a href="#">21</a> |
|    |               |            |                                                    |     |                                                                                      |  | <a href="#">404</a> | <a href="#">435</a> | <a href="#">29</a> |
| 21 | Not clustered | PVX_104695 | variable surface protein Vir6-like                 | 435 |    |  | <a href="#">108</a> | <a href="#">202</a> | <a href="#">40</a> |
|    |               |            |                                                    |     |                                                                                      |  | <a href="#">67</a>  | <a href="#">76</a>  | <a href="#">21</a> |
|    |               |            |                                                    |     |                                                                                      |  | <a href="#">378</a> | <a href="#">404</a> | <a href="#">74</a> |
|    |               |            |                                                    |     |                                                                                      |  | <a href="#">377</a> | <a href="#">390</a> | <a href="#">74</a> |
|    |               |            |                                                    |     |                                                                                      |  | <a href="#">110</a> | <a href="#">138</a> | <a href="#">40</a> |
|    |               |            |                                                    |     |                                                                                      |  | <a href="#">409</a> | <a href="#">428</a> | <a href="#">21</a> |
|    |               |            |                                                    |     |                                                                                      |  | <a href="#">346</a> | <a href="#">376</a> | <a href="#">29</a> |
|    |               |            |                                                    |     |                                                                                      |  | <a href="#">81</a>  | <a href="#">89</a>  | <a href="#">21</a> |
| 22 | Not clustered | PVX_024185 | variable surface protein Vir6-like                 | 427 |    |  | <a href="#">377</a> | <a href="#">398</a> | <a href="#">74</a> |
|    |               |            |                                                    |     |                                                                                      |  | <a href="#">125</a> | <a href="#">153</a> | <a href="#">40</a> |
|    |               |            |                                                    |     |                                                                                      |  | <a href="#">400</a> | <a href="#">423</a> | <a href="#">21</a> |
|    |               |            |                                                    |     |                                                                                      |  | <a href="#">77</a>  | <a href="#">89</a>  | <a href="#">72</a> |
|    |               |            |                                                    |     |                                                                                      |  | <a href="#">79</a>  | <a href="#">87</a>  | <a href="#">72</a> |
|    |               |            |                                                    |     |                                                                                      |  | <a href="#">397</a> | <a href="#">423</a> | <a href="#">74</a> |
|    |               |            |                                                    |     |                                                                                      |  | <a href="#">396</a> | <a href="#">410</a> | <a href="#">74</a> |
|    |               |            |                                                    |     |                                                                                      |  | <a href="#">123</a> | <a href="#">151</a> | <a href="#">40</a> |
|    |               |            |                                                    |     |                                                                                      |  | <a href="#">77</a>  | <a href="#">84</a>  | <a href="#">21</a> |
|    |               |            |                                                    |     |                                                                                      |  | <a href="#">10</a>  | <a href="#">105</a> | <a href="#">21</a> |
|    |               |            |                                                    |     |                                                                                      |  | <a href="#">425</a> | <a href="#">438</a> | <a href="#">21</a> |
|    |               |            |                                                    |     |                                                                                      |  | <a href="#">77</a>  | <a href="#">84</a>  | <a href="#">72</a> |
|    |               |            |                                                    |     |                                                                                      |  | <a href="#">365</a> | <a href="#">396</a> | <a href="#">29</a> |
|    |               |            |                                                    |     |                                                                                      |  | <a href="#">82</a>  | <a href="#">93</a>  | <a href="#">72</a> |
|    |               |            |                                                    |     |                                                                                      |  | <a href="#">408</a> | <a href="#">434</a> | <a href="#">74</a> |
|    |               |            |                                                    |     |                                                                                      |  | <a href="#">407</a> | <a href="#">420</a> | <a href="#">74</a> |
| 24 | G             | PVX_014630 | variable surface protein Vir6, putative            | 464 |  |  | <a href="#">13</a>  | <a href="#">113</a> | <a href="#">21</a> |
|    |               |            |                                                    |     |                                                                                      |  | <a href="#">441</a> | <a href="#">458</a> | <a href="#">21</a> |
|    |               |            |                                                    |     |                                                                                      |  | <a href="#">376</a> | <a href="#">406</a> | <a href="#">29</a> |
|    |               |            |                                                    |     |                                                                                      |  | <a href="#">82</a>  | <a href="#">93</a>  | <a href="#">72</a> |
|    |               |            |                                                    |     |                                                                                      |  | <a href="#">50</a>  | <a href="#">76</a>  | <a href="#">74</a> |
|    |               |            |                                                    |     |                                                                                      |  | <a href="#">49</a>  | <a href="#">63</a>  | <a href="#">74</a> |
|    |               |            |                                                    |     |                                                                                      |  | <a href="#">78</a>  | <a href="#">101</a> | <a href="#">21</a> |
|    |               |            |                                                    |     |                                                                                      |  | <a href="#">18</a>  | <a href="#">49</a>  | <a href="#">29</a> |
|    |               |            |                                                    |     |                                                                                      |  | <a href="#">129</a> | <a href="#">155</a> | <a href="#">74</a> |
|    |               |            |                                                    |     |                                                                                      |  | <a href="#">129</a> | <a href="#">147</a> | <a href="#">74</a> |
|    |               |            |                                                    |     |                                                                                      |  | <a href="#">160</a> | <a href="#">178</a> | <a href="#">21</a> |
|    |               |            |                                                    |     |                                                                                      |  | <a href="#">97</a>  | <a href="#">128</a> | <a href="#">29</a> |
|    |               |            |                                                    |     |                                                                                      |  | <a href="#">264</a> | <a href="#">290</a> | <a href="#">74</a> |
|    |               |            |                                                    |     |                                                                                      |  | <a href="#">263</a> | <a href="#">277</a> | <a href="#">74</a> |
|    |               |            |                                                    |     |                                                                                      |  | <a href="#">292</a> | <a href="#">315</a> | <a href="#">21</a> |
|    |               |            |                                                    |     |                                                                                      |  | <a href="#">237</a> | <a href="#">263</a> | <a href="#">29</a> |
|    |               |            |                                                    |     |                                                                                      |  | <a href="#">224</a> | <a href="#">247</a> | <a href="#">74</a> |
|    |               |            |                                                    |     |                                                                                      |  | <a href="#">223</a> | <a href="#">243</a> | <a href="#">74</a> |
| 28 | Not clustered | PVX_040190 | variable surface protein Vir6, truncated, putative | 266 |  |  | <a href="#">199</a> | <a href="#">222</a> | <a href="#">29</a> |



|                     |                     |                    |                                                    |     |  |                     |                     |                    |
|---------------------|---------------------|--------------------|----------------------------------------------------|-----|--|---------------------|---------------------|--------------------|
| 29                  | G                   | PVX_047190         | variable surface protein Vir28-like                | 325 |  | <a href="#">270</a> | <a href="#">296</a> | <a href="#">74</a> |
|                     |                     |                    |                                                    |     |  | <a href="#">2</a>   | <a href="#">45</a>  | <a href="#">40</a> |
|                     |                     |                    |                                                    |     |  | <a href="#">269</a> | <a href="#">283</a> | <a href="#">74</a> |
|                     |                     |                    |                                                    |     |  | <a href="#">2</a>   | <a href="#">19</a>  | <a href="#">40</a> |
|                     |                     |                    |                                                    |     |  | <a href="#">298</a> | <a href="#">321</a> | <a href="#">21</a> |
|                     |                     |                    |                                                    |     |  | <a href="#">241</a> | <a href="#">269</a> | <a href="#">29</a> |
| 30                  | Not clustered       | PVX_057190         | variable surface protein Vir6, truncated, putative | 118 |  | <a href="#">110</a> | <a href="#">116</a> | <a href="#">8</a>  |
|                     |                     |                    |                                                    |     |  | <a href="#">86</a>  | <a href="#">117</a> | <a href="#">8</a>  |
|                     |                     |                    |                                                    |     |  | <a href="#">61</a>  | <a href="#">87</a>  | <a href="#">74</a> |
|                     |                     |                    |                                                    |     |  | <a href="#">60</a>  | <a href="#">74</a>  | <a href="#">74</a> |
|                     |                     |                    |                                                    |     |  | <a href="#">29</a>  | <a href="#">60</a>  | <a href="#">29</a> |
|                     |                     |                    |                                                    |     |  | <a href="#">76</a>  | <a href="#">89</a>  | <a href="#">72</a> |
| 31                  | Not clustered       | PVX_018655         | variable surface protein Vir28-like                | 515 |  | <a href="#">184</a> | <a href="#">208</a> | <a href="#">6</a>  |
|                     |                     |                    |                                                    |     |  | <a href="#">123</a> | <a href="#">210</a> | <a href="#">40</a> |
|                     |                     |                    |                                                    |     |  | <a href="#">479</a> | <a href="#">510</a> | <a href="#">8</a>  |
|                     |                     |                    |                                                    |     |  | <a href="#">78</a>  | <a href="#">86</a>  | <a href="#">72</a> |
|                     |                     |                    |                                                    |     |  | <a href="#">224</a> | <a href="#">250</a> | <a href="#">6</a>  |
|                     |                     |                    |                                                    |     |  | <a href="#">250</a> | <a href="#">272</a> | <a href="#">6</a>  |
|                     |                     |                    |                                                    |     |  | <a href="#">74</a>  | <a href="#">83</a>  | <a href="#">21</a> |
|                     |                     |                    |                                                    |     |  | <a href="#">453</a> | <a href="#">476</a> | <a href="#">74</a> |
|                     |                     |                    |                                                    |     |  | <a href="#">118</a> | <a href="#">169</a> | <a href="#">40</a> |
|                     |                     |                    |                                                    |     |  | <a href="#">177</a> | <a href="#">210</a> | <a href="#">6</a>  |
|                     |                     |                    |                                                    |     |  | <a href="#">453</a> | <a href="#">476</a> | <a href="#">74</a> |
|                     |                     |                    |                                                    |     |  | <a href="#">119</a> | <a href="#">148</a> | <a href="#">40</a> |
| <a href="#">7</a>   | <a href="#">110</a> | <a href="#">21</a> |                                                    |     |  |                     |                     |                    |
| 32                  | Not clustered       | PVX_032190         | variable surface protein Vir28-related             | 497 |  | <a href="#">421</a> | <a href="#">451</a> | <a href="#">29</a> |
|                     |                     |                    |                                                    |     |  | <a href="#">79</a>  | <a href="#">92</a>  | <a href="#">72</a> |
|                     |                     |                    |                                                    |     |  | <a href="#">188</a> | <a href="#">212</a> | <a href="#">6</a>  |
|                     |                     |                    |                                                    |     |  | <a href="#">121</a> | <a href="#">212</a> | <a href="#">40</a> |
|                     |                     |                    |                                                    |     |  | <a href="#">461</a> | <a href="#">492</a> | <a href="#">8</a>  |
|                     |                     |                    |                                                    |     |  | <a href="#">81</a>  | <a href="#">89</a>  | <a href="#">72</a> |
|                     |                     |                    |                                                    |     |  | <a href="#">227</a> | <a href="#">255</a> | <a href="#">6</a>  |
|                     |                     |                    |                                                    |     |  | <a href="#">259</a> | <a href="#">276</a> | <a href="#">6</a>  |
|                     |                     |                    |                                                    |     |  | <a href="#">435</a> | <a href="#">460</a> | <a href="#">74</a> |
|                     |                     |                    |                                                    |     |  | <a href="#">122</a> | <a href="#">177</a> | <a href="#">40</a> |
|                     |                     |                    |                                                    |     |  | <a href="#">181</a> | <a href="#">214</a> | <a href="#">6</a>  |
|                     |                     |                    |                                                    |     |  | <a href="#">122</a> | <a href="#">151</a> | <a href="#">40</a> |
| <a href="#">10</a>  | <a href="#">113</a> | <a href="#">21</a> |                                                    |     |  |                     |                     |                    |
| 33                  | Not clustered       | PVX_012115         | variable surface protein Vir 28/6-related          | 506 |  | <a href="#">403</a> | <a href="#">433</a> | <a href="#">29</a> |
|                     |                     |                    |                                                    |     |  | <a href="#">78</a>  | <a href="#">89</a>  | <a href="#">72</a> |
|                     |                     |                    |                                                    |     |  | <a href="#">185</a> | <a href="#">210</a> | <a href="#">6</a>  |
|                     |                     |                    |                                                    |     |  | <a href="#">122</a> | <a href="#">207</a> | <a href="#">40</a> |
|                     |                     |                    |                                                    |     |  | <a href="#">470</a> | <a href="#">501</a> | <a href="#">8</a>  |
|                     |                     |                    |                                                    |     |  | <a href="#">78</a>  | <a href="#">87</a>  | <a href="#">72</a> |
| <a href="#">224</a> | <a href="#">252</a> | <a href="#">6</a>  |                                                    |     |  |                     |                     |                    |

|    |               |            |                                                |     |                                                                                      |                     |                     |                    |
|----|---------------|------------|------------------------------------------------|-----|--------------------------------------------------------------------------------------|---------------------|---------------------|--------------------|
|    |               |            |                                                |     |                                                                                      | <a href="#">257</a> | <a href="#">273</a> | <a href="#">6</a>  |
|    |               |            |                                                |     |                                                                                      | <a href="#">443</a> | <a href="#">469</a> | <a href="#">74</a> |
|    |               |            |                                                |     |                                                                                      | <a href="#">178</a> | <a href="#">211</a> | <a href="#">6</a>  |
|    |               |            |                                                |     |                                                                                      | <a href="#">442</a> | <a href="#">471</a> | <a href="#">74</a> |
|    |               |            |                                                |     |                                                                                      | <a href="#">120</a> | <a href="#">148</a> | <a href="#">40</a> |
|    |               |            |                                                |     |                                                                                      | <a href="#">7</a>   | <a href="#">110</a> | <a href="#">21</a> |
|    |               |            |                                                |     |                                                                                      | <a href="#">412</a> | <a href="#">442</a> | <a href="#">29</a> |
| 34 |               | PVX_102130 | hypothetical protein                           | 456 | 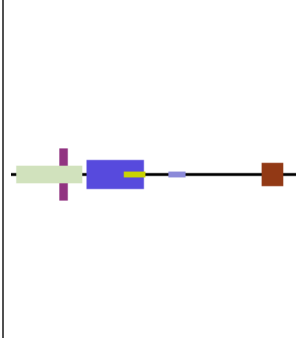   | <a href="#">79</a>  | <a href="#">91</a>  | <a href="#">72</a> |
|    |               |            |                                                |     |                                                                                      | <a href="#">188</a> | <a href="#">213</a> | <a href="#">6</a>  |
|    |               |            |                                                |     |                                                                                      | <a href="#">126</a> | <a href="#">210</a> | <a href="#">40</a> |
|    |               |            |                                                |     |                                                                                      | <a href="#">252</a> | <a href="#">277</a> | <a href="#">6</a>  |
|    |               |            |                                                |     |                                                                                      | <a href="#">121</a> | <a href="#">178</a> | <a href="#">40</a> |
|    |               |            |                                                |     |                                                                                      | <a href="#">181</a> | <a href="#">214</a> | <a href="#">6</a>  |
|    |               |            |                                                |     |                                                                                      | <a href="#">122</a> | <a href="#">151</a> | <a href="#">40</a> |
|    |               |            |                                                |     |                                                                                      | <a href="#">10</a>  | <a href="#">113</a> | <a href="#">21</a> |
|    |               |            |                                                |     |                                                                                      | <a href="#">401</a> | <a href="#">431</a> | <a href="#">29</a> |
| 35 | Not clustered | PVX_048690 | variable surface protein Vir7-like             | 408 |   | <a href="#">324</a> | <a href="#">345</a> | <a href="#">9</a>  |
|    |               |            |                                                |     |                                                                                      | <a href="#">189</a> | <a href="#">214</a> | <a href="#">6</a>  |
|    |               |            |                                                |     |                                                                                      | <a href="#">324</a> | <a href="#">345</a> | <a href="#">9</a>  |
|    |               |            |                                                |     |                                                                                      | <a href="#">394</a> | <a href="#">406</a> | <a href="#">8</a>  |
|    |               |            |                                                |     |                                                                                      | <a href="#">358</a> | <a href="#">379</a> | <a href="#">15</a> |
|    |               |            |                                                |     |                                                                                      | <a href="#">119</a> | <a href="#">170</a> | <a href="#">40</a> |
|    |               |            |                                                |     |                                                                                      | <a href="#">189</a> | <a href="#">214</a> | <a href="#">6</a>  |
|    |               |            |                                                |     |                                                                                      | <a href="#">325</a> | <a href="#">345</a> | <a href="#">9</a>  |
|    |               |            |                                                |     |                                                                                      | <a href="#">358</a> | <a href="#">370</a> | <a href="#">15</a> |
|    |               |            |                                                |     |                                                                                      | <a href="#">119</a> | <a href="#">145</a> | <a href="#">40</a> |
|    |               |            |                                                |     |                                                                                      | <a href="#">9</a>   | <a href="#">112</a> | <a href="#">21</a> |
| 36 |               | PVX_102645 | hypothetical protein                           | 92  |  | <a href="#">67</a>  | <a href="#">89</a>  | <a href="#">8</a>  |
|    |               |            |                                                |     |                                                                                      | <a href="#">39</a>  | <a href="#">59</a>  | <a href="#">74</a> |
| 37 | Not clustered | PVX_112115 | variable surface protein Vir6, putative        | 320 |  | <a href="#">82</a>  | <a href="#">90</a>  | <a href="#">72</a> |
|    |               |            |                                                |     |                                                                                      | <a href="#">84</a>  | <a href="#">93</a>  | <a href="#">72</a> |
|    |               |            |                                                |     |                                                                                      | <a href="#">258</a> | <a href="#">287</a> | <a href="#">74</a> |
|    |               |            |                                                |     |                                                                                      | <a href="#">260</a> | <a href="#">271</a> | <a href="#">74</a> |
|    |               |            |                                                |     |                                                                                      | <a href="#">20</a>  | <a href="#">115</a> | <a href="#">21</a> |
|    |               |            |                                                |     |                                                                                      | <a href="#">82</a>  | <a href="#">89</a>  | <a href="#">72</a> |
| 38 | Unavailable   | PVX_174270 | variable surface protein Vir6-like, pseudogene | 475 |  | <a href="#">77</a>  | <a href="#">89</a>  | <a href="#">21</a> |
|    |               |            |                                                |     |                                                                                      | <a href="#">52</a>  | <a href="#">70</a>  | <a href="#">7</a>  |
|    |               |            |                                                |     |                                                                                      | <a href="#">52</a>  | <a href="#">74</a>  | <a href="#">7</a>  |
|    |               |            |                                                |     |                                                                                      | <a href="#">78</a>  | <a href="#">87</a>  | <a href="#">21</a> |
| 1  | H             | PVX_112125 | variable surface protein Vir18, putative       | 423 |  | <a href="#">120</a> | <a href="#">155</a> | <a href="#">10</a> |
|    |               |            |                                                |     |                                                                                      | <a href="#">164</a> | <a href="#">238</a> | <a href="#">21</a> |
|    |               |            |                                                |     |                                                                                      | <a href="#">50</a>  | <a href="#">71</a>  | <a href="#">10</a> |
|    |               |            |                                                |     |                                                                                      | <a href="#">20</a>  | <a href="#">47</a>  | <a href="#">28</a> |
| 2  |               | PVX_106215 | hypothetical protein                           | 328 |  | <a href="#">170</a> | <a href="#">230</a> | <a href="#">21</a> |
|    |               |            |                                                |     |                                                                                      | <a href="#">47</a>  | <a href="#">67</a>  | <a href="#">10</a> |

|    |               |            |                                          |     |                                                                                      |                                                                                       |                     |                     |                    |
|----|---------------|------------|------------------------------------------|-----|--------------------------------------------------------------------------------------|---------------------------------------------------------------------------------------|---------------------|---------------------|--------------------|
|    |               |            |                                          |     |                                                                                      |                                                                                       | <a href="#">16</a>  | <a href="#">52</a>  | <a href="#">28</a> |
| 3  | Not clustered | PVX_006080 | variable surface protein Vir18-related   | 577 |    |    | <a href="#">64</a>  | <a href="#">101</a> | <a href="#">25</a> |
|    |               |            |                                          |     |                                                                                      |                                                                                       | <a href="#">161</a> | <a href="#">238</a> | <a href="#">21</a> |
|    |               |            |                                          |     |                                                                                      |                                                                                       | <a href="#">14</a>  | <a href="#">61</a>  | <a href="#">28</a> |
| 4  | Unavailable   | PVX_013625 | variable surface protein Vir18, putative | 381 |    |    | <a href="#">64</a>  | <a href="#">96</a>  | <a href="#">25</a> |
|    |               |            |                                          |     |                                                                                      |                                                                                       | <a href="#">164</a> | <a href="#">234</a> | <a href="#">21</a> |
|    |               |            |                                          |     |                                                                                      |                                                                                       | <a href="#">19</a>  | <a href="#">57</a>  | <a href="#">28</a> |
| 5  | Not clustered | PVX_015640 | variable surface protein Vir18-related   | 427 |    |    | <a href="#">63</a>  | <a href="#">99</a>  | <a href="#">25</a> |
|    |               |            |                                          |     |                                                                                      |                                                                                       | <a href="#">103</a> | <a href="#">151</a> | <a href="#">10</a> |
|    |               |            |                                          |     |                                                                                      |                                                                                       | <a href="#">160</a> | <a href="#">231</a> | <a href="#">21</a> |
|    |               |            |                                          |     |                                                                                      |                                                                                       | <a href="#">49</a>  | <a href="#">70</a>  | <a href="#">10</a> |
|    |               |            |                                          |     |                                                                                      |                                                                                       | <a href="#">16</a>  | <a href="#">60</a>  | <a href="#">28</a> |
| 6  |               | PVX_107230 | hypothetical protein                     | 416 |    |    | <a href="#">235</a> | <a href="#">275</a> | <a href="#">7</a>  |
|    |               |            |                                          |     |                                                                                      |                                                                                       | <a href="#">63</a>  | <a href="#">100</a> | <a href="#">25</a> |
|    |               |            |                                          |     |                                                                                      |                                                                                       | <a href="#">106</a> | <a href="#">151</a> | <a href="#">10</a> |
|    |               |            |                                          |     |                                                                                      |                                                                                       | <a href="#">160</a> | <a href="#">234</a> | <a href="#">21</a> |
|    |               |            |                                          |     |                                                                                      |                                                                                       | <a href="#">47</a>  | <a href="#">70</a>  | <a href="#">10</a> |
|    |               |            |                                          |     |                                                                                      |                                                                                       | <a href="#">16</a>  | <a href="#">51</a>  | <a href="#">28</a> |
| 7  | Not clustered | PVX_045190 | variable surface protein Vir18-related   | 130 |    |    | <a href="#">63</a>  | <a href="#">100</a> | <a href="#">25</a> |
|    |               |            |                                          |     |                                                                                      |                                                                                       | <a href="#">46</a>  | <a href="#">70</a>  | <a href="#">10</a> |
|    |               |            |                                          |     |                                                                                      |                                                                                       | <a href="#">15</a>  | <a href="#">50</a>  | <a href="#">28</a> |
| 8  | Not clustered | PVX_120335 | variable surface protein Vir18-related   | 485 |  |  | <a href="#">418</a> | <a href="#">434</a> | <a href="#">23</a> |
|    |               |            |                                          |     |                                                                                      |                                                                                       | <a href="#">412</a> | <a href="#">433</a> | <a href="#">23</a> |
|    |               |            |                                          |     |                                                                                      |                                                                                       | <a href="#">433</a> | <a href="#">454</a> | <a href="#">74</a> |
|    |               |            |                                          |     |                                                                                      |                                                                                       | <a href="#">84</a>  | <a href="#">115</a> | <a href="#">25</a> |
|    |               |            |                                          |     |                                                                                      |                                                                                       | <a href="#">69</a>  | <a href="#">91</a>  | <a href="#">10</a> |
|    |               |            |                                          |     |                                                                                      |                                                                                       | <a href="#">43</a>  | <a href="#">70</a>  | <a href="#">28</a> |
| 9  | Not clustered | PVX_093705 | variable surface protein Vir18, putative | 318 |  |  | <a href="#">271</a> | <a href="#">292</a> | <a href="#">23</a> |
|    |               |            |                                          |     |                                                                                      |                                                                                       | <a href="#">289</a> | <a href="#">310</a> | <a href="#">74</a> |
|    |               |            |                                          |     |                                                                                      |                                                                                       | <a href="#">59</a>  | <a href="#">95</a>  | <a href="#">25</a> |
|    |               |            |                                          |     |                                                                                      |                                                                                       | <a href="#">16</a>  | <a href="#">56</a>  | <a href="#">28</a> |
| 10 | Not clustered | PVX_121855 | variable surface protein Vir18, putative | 402 |  |  | <a href="#">335</a> | <a href="#">356</a> | <a href="#">23</a> |
|    |               |            |                                          |     |                                                                                      |                                                                                       | <a href="#">63</a>  | <a href="#">99</a>  | <a href="#">25</a> |
|    |               |            |                                          |     |                                                                                      |                                                                                       | <a href="#">47</a>  | <a href="#">70</a>  | <a href="#">10</a> |
| 11 |               | PVX_035690 | hypothetical protein                     | 298 |  |  | <a href="#">258</a> | <a href="#">280</a> | <a href="#">23</a> |
|    |               |            |                                          |     |                                                                                      |                                                                                       | <a href="#">268</a> | <a href="#">280</a> | <a href="#">23</a> |
|    |               |            |                                          |     |                                                                                      |                                                                                       | <a href="#">26</a>  | <a href="#">96</a>  | <a href="#">21</a> |
| 12 | Not clustered | PVX_060690 | variable surface protein Vir18-related   | 656 |  |  | <a href="#">620</a> | <a href="#">654</a> | <a href="#">21</a> |
|    |               |            |                                          |     |                                                                                      |                                                                                       | <a href="#">584</a> | <a href="#">605</a> | <a href="#">23</a> |
|    |               |            |                                          |     |                                                                                      |                                                                                       | <a href="#">159</a> | <a href="#">236</a> | <a href="#">21</a> |
|    |               |            |                                          |     |                                                                                      |                                                                                       | <a href="#">16</a>  | <a href="#">57</a>  | <a href="#">28</a> |
| 13 | H             | PVX_068190 | variable surface protein Vir18, putative | 511 |  |  | <a href="#">456</a> | <a href="#">468</a> | <a href="#">19</a> |
|    |               |            |                                          |     |                                                                                      |                                                                                       | <a href="#">437</a> | <a href="#">456</a> | <a href="#">23</a> |
|    |               |            |                                          |     |                                                                                      |                                                                                       | <a href="#">289</a> | <a href="#">396</a> | <a href="#">4</a>  |
|    |               |            |                                          |     |                                                                                      |                                                                                       | <a href="#">245</a> | <a href="#">286</a> | <a href="#">7</a>  |



|    |   |            |                                          |     |                                                                                      |                     |                     |                    |
|----|---|------------|------------------------------------------|-----|--------------------------------------------------------------------------------------|---------------------|---------------------|--------------------|
| 16 | H | PVX_021180 | variable surface protein Vir18, putative | 467 |    | <a href="#">413</a> | <a href="#">424</a> | <a href="#">19</a> |
|    |   |            |                                          |     |                                                                                      | <a href="#">283</a> | <a href="#">389</a> | <a href="#">4</a>  |
|    |   |            |                                          |     |                                                                                      | <a href="#">425</a> | <a href="#">460</a> | <a href="#">21</a> |
|    |   |            |                                          |     |                                                                                      | <a href="#">234</a> | <a href="#">282</a> | <a href="#">7</a>  |
|    |   |            |                                          |     |                                                                                      | <a href="#">63</a>  | <a href="#">100</a> | <a href="#">25</a> |
|    |   |            |                                          |     |                                                                                      | <a href="#">283</a> | <a href="#">390</a> | <a href="#">4</a>  |
|    |   |            |                                          |     |                                                                                      | <a href="#">283</a> | <a href="#">390</a> | <a href="#">4</a>  |
|    |   |            |                                          |     |                                                                                      | <a href="#">13</a>  | <a href="#">60</a>  | <a href="#">28</a> |
|    |   |            |                                          |     |                                                                                      | <a href="#">137</a> | <a href="#">230</a> | <a href="#">21</a> |
| 17 | H | PVX_020675 | variable surface protein Vir18, putative | 495 |    | <a href="#">441</a> | <a href="#">452</a> | <a href="#">19</a> |
|    |   |            |                                          |     |                                                                                      | <a href="#">417</a> | <a href="#">440</a> | <a href="#">23</a> |
|    |   |            |                                          |     |                                                                                      | <a href="#">453</a> | <a href="#">488</a> | <a href="#">21</a> |
|    |   |            |                                          |     |                                                                                      | <a href="#">426</a> | <a href="#">439</a> | <a href="#">23</a> |
|    |   |            |                                          |     |                                                                                      | <a href="#">437</a> | <a href="#">454</a> | <a href="#">74</a> |
|    |   |            |                                          |     |                                                                                      | <a href="#">389</a> | <a href="#">415</a> | <a href="#">12</a> |
|    |   |            |                                          |     |                                                                                      | <a href="#">166</a> | <a href="#">226</a> | <a href="#">21</a> |
|    |   |            |                                          |     |                                                                                      | <a href="#">45</a>  | <a href="#">69</a>  | <a href="#">10</a> |
|    |   |            |                                          |     |                                                                                      | <a href="#">14</a>  | <a href="#">44</a>  | <a href="#">28</a> |
| 18 | H | PVX_011110 | variable surface protein Vir18-like      | 475 |  | <a href="#">426</a> | <a href="#">438</a> | <a href="#">19</a> |
|    |   |            |                                          |     |                                                                                      | <a href="#">403</a> | <a href="#">426</a> | <a href="#">23</a> |
|    |   |            |                                          |     |                                                                                      | <a href="#">439</a> | <a href="#">475</a> | <a href="#">21</a> |
|    |   |            |                                          |     |                                                                                      | <a href="#">413</a> | <a href="#">425</a> | <a href="#">23</a> |
|    |   |            |                                          |     |                                                                                      | <a href="#">423</a> | <a href="#">441</a> | <a href="#">74</a> |
|    |   |            |                                          |     |                                                                                      | <a href="#">365</a> | <a href="#">402</a> | <a href="#">12</a> |
|    |   |            |                                          |     |                                                                                      | <a href="#">46</a>  | <a href="#">70</a>  | <a href="#">10</a> |
|    |   |            |                                          |     |                                                                                      | <a href="#">14</a>  | <a href="#">60</a>  | <a href="#">28</a> |
|    |   |            |                                          |     |                                                                                      | <a href="#">498</a> | <a href="#">510</a> | <a href="#">19</a> |
| 19 | H | PVX_083585 | variable surface protein Vir18-related   | 548 |  | <a href="#">475</a> | <a href="#">498</a> | <a href="#">23</a> |
|    |   |            |                                          |     |                                                                                      | <a href="#">512</a> | <a href="#">547</a> | <a href="#">21</a> |
|    |   |            |                                          |     |                                                                                      | <a href="#">511</a> | <a href="#">547</a> | <a href="#">21</a> |
|    |   |            |                                          |     |                                                                                      | <a href="#">494</a> | <a href="#">511</a> | <a href="#">74</a> |
|    |   |            |                                          |     |                                                                                      | <a href="#">485</a> | <a href="#">497</a> | <a href="#">23</a> |
|    |   |            |                                          |     |                                                                                      | <a href="#">442</a> | <a href="#">474</a> | <a href="#">12</a> |
|    |   |            |                                          |     |                                                                                      | <a href="#">47</a>  | <a href="#">71</a>  | <a href="#">10</a> |
|    |   |            |                                          |     |                                                                                      | <a href="#">16</a>  | <a href="#">44</a>  | <a href="#">28</a> |
|    |   |            |                                          |     |                                                                                      | <a href="#">477</a> | <a href="#">489</a> | <a href="#">19</a> |
| 20 | H | PVX_101625 | variable surface protein Vir18-like      | 527 |  | <a href="#">454</a> | <a href="#">477</a> | <a href="#">23</a> |
|    |   |            |                                          |     |                                                                                      | <a href="#">490</a> | <a href="#">526</a> | <a href="#">21</a> |
|    |   |            |                                          |     |                                                                                      | <a href="#">473</a> | <a href="#">489</a> | <a href="#">74</a> |
|    |   |            |                                          |     |                                                                                      | <a href="#">464</a> | <a href="#">476</a> | <a href="#">23</a> |
|    |   |            |                                          |     |                                                                                      | <a href="#">49</a>  | <a href="#">85</a>  | <a href="#">25</a> |
|    |   |            |                                          |     |                                                                                      | <a href="#">149</a> | <a href="#">224</a> | <a href="#">21</a> |
|    |   |            |                                          |     |                                                                                      | <a href="#">34</a>  | <a href="#">56</a>  | <a href="#">10</a> |
|    |   |            |                                          |     |                                                                                      | <a href="#">2</a>   | <a href="#">27</a>  | <a href="#">28</a> |
|    |   |            |                                          |     |                                                                                      | <a href="#">130</a> | <a href="#">202</a> | <a href="#">21</a> |

|                    |                    |                    |                                                     |     |                                                                                      |                     |                     |                    |
|--------------------|--------------------|--------------------|-----------------------------------------------------|-----|--------------------------------------------------------------------------------------|---------------------|---------------------|--------------------|
| 21                 | H                  | PVX_017650         | variable surface protein Vir18, putative            | 502 |    | <a href="#">453</a> | <a href="#">465</a> | <a href="#">19</a> |
|                    |                    |                    |                                                     |     |                                                                                      | <a href="#">430</a> | <a href="#">453</a> | <a href="#">23</a> |
|                    |                    |                    |                                                     |     |                                                                                      | <a href="#">470</a> | <a href="#">502</a> | <a href="#">21</a> |
|                    |                    |                    |                                                     |     |                                                                                      | <a href="#">440</a> | <a href="#">452</a> | <a href="#">23</a> |
|                    |                    |                    |                                                     |     |                                                                                      | <a href="#">64</a>  | <a href="#">101</a> | <a href="#">25</a> |
|                    |                    |                    |                                                     |     |                                                                                      | <a href="#">102</a> | <a href="#">158</a> | <a href="#">10</a> |
|                    |                    |                    |                                                     |     |                                                                                      | <a href="#">393</a> | <a href="#">429</a> | <a href="#">12</a> |
|                    |                    |                    |                                                     |     |                                                                                      | <a href="#">163</a> | <a href="#">239</a> | <a href="#">21</a> |
|                    |                    |                    |                                                     |     |                                                                                      | <a href="#">15</a>  | <a href="#">61</a>  | <a href="#">28</a> |
| 22                 | H                  | PVX_016640         | variable surface protein Vir18-like                 | 483 |    | <a href="#">434</a> | <a href="#">446</a> | <a href="#">19</a> |
|                    |                    |                    |                                                     |     |                                                                                      | <a href="#">411</a> | <a href="#">434</a> | <a href="#">23</a> |
|                    |                    |                    |                                                     |     |                                                                                      | <a href="#">447</a> | <a href="#">483</a> | <a href="#">21</a> |
|                    |                    |                    |                                                     |     |                                                                                      | <a href="#">421</a> | <a href="#">433</a> | <a href="#">23</a> |
|                    |                    |                    |                                                     |     |                                                                                      | <a href="#">64</a>  | <a href="#">100</a> | <a href="#">25</a> |
|                    |                    |                    |                                                     |     |                                                                                      | <a href="#">107</a> | <a href="#">136</a> | <a href="#">10</a> |
|                    |                    |                    |                                                     |     |                                                                                      | <a href="#">371</a> | <a href="#">410</a> | <a href="#">12</a> |
|                    |                    |                    |                                                     |     |                                                                                      | <a href="#">166</a> | <a href="#">235</a> | <a href="#">21</a> |
|                    |                    |                    |                                                     |     |                                                                                      | <a href="#">17</a>  | <a href="#">61</a>  | <a href="#">28</a> |
| 23                 | H                  | PVX_018150         | variable surface protein Vir18, putative            | 510 |  | <a href="#">456</a> | <a href="#">467</a> | <a href="#">19</a> |
|                    |                    |                    |                                                     |     |                                                                                      | <a href="#">432</a> | <a href="#">455</a> | <a href="#">23</a> |
|                    |                    |                    |                                                     |     |                                                                                      | <a href="#">470</a> | <a href="#">503</a> | <a href="#">21</a> |
|                    |                    |                    |                                                     |     |                                                                                      | <a href="#">441</a> | <a href="#">454</a> | <a href="#">23</a> |
|                    |                    |                    |                                                     |     |                                                                                      | <a href="#">238</a> | <a href="#">388</a> | <a href="#">5</a>  |
|                    |                    |                    |                                                     |     |                                                                                      | <a href="#">63</a>  | <a href="#">100</a> | <a href="#">25</a> |
|                    |                    |                    |                                                     |     |                                                                                      | <a href="#">106</a> | <a href="#">151</a> | <a href="#">10</a> |
|                    |                    |                    |                                                     |     |                                                                                      | <a href="#">391</a> | <a href="#">415</a> | <a href="#">12</a> |
|                    |                    |                    |                                                     |     |                                                                                      | <a href="#">159</a> | <a href="#">237</a> | <a href="#">21</a> |
| <a href="#">13</a> | <a href="#">60</a> | <a href="#">28</a> |                                                     |     |                                                                                      |                     |                     |                    |
| 24                 | H                  | PVX_065190         | variable surface protein Vir18, truncated, putative | 442 |  | <a href="#">387</a> | <a href="#">399</a> | <a href="#">19</a> |
|                    |                    |                    |                                                     |     |                                                                                      | <a href="#">368</a> | <a href="#">387</a> | <a href="#">23</a> |
|                    |                    |                    |                                                     |     |                                                                                      | <a href="#">401</a> | <a href="#">436</a> | <a href="#">21</a> |
|                    |                    |                    |                                                     |     |                                                                                      | <a href="#">373</a> | <a href="#">386</a> | <a href="#">23</a> |
|                    |                    |                    |                                                     |     |                                                                                      | <a href="#">175</a> | <a href="#">326</a> | <a href="#">5</a>  |
|                    |                    |                    |                                                     |     |                                                                                      | <a href="#">1</a>   | <a href="#">37</a>  | <a href="#">25</a> |
|                    |                    |                    |                                                     |     |                                                                                      | <a href="#">38</a>  | <a href="#">93</a>  | <a href="#">10</a> |
|                    |                    |                    |                                                     |     |                                                                                      | <a href="#">96</a>  | <a href="#">174</a> | <a href="#">21</a> |
|                    |                    |                    |                                                     |     |                                                                                      | <a href="#">429</a> | <a href="#">441</a> | <a href="#">19</a> |
| 25                 | H                  | PVX_010100         | variable surface protein Vir18, putative            | 478 |  | <a href="#">443</a> | <a href="#">478</a> | <a href="#">21</a> |
|                    |                    |                    |                                                     |     |                                                                                      | <a href="#">102</a> | <a href="#">151</a> | <a href="#">10</a> |
|                    |                    |                    |                                                     |     |                                                                                      | <a href="#">232</a> | <a href="#">383</a> | <a href="#">5</a>  |
|                    |                    |                    |                                                     |     |                                                                                      | <a href="#">231</a> | <a href="#">383</a> | <a href="#">5</a>  |
|                    |                    |                    |                                                     |     |                                                                                      | <a href="#">57</a>  | <a href="#">94</a>  | <a href="#">25</a> |
|                    |                    |                    |                                                     |     |                                                                                      | <a href="#">99</a>  | <a href="#">149</a> | <a href="#">10</a> |
|                    |                    |                    |                                                     |     |                                                                                      | <a href="#">385</a> | <a href="#">424</a> | <a href="#">12</a> |
|                    |                    |                    |                                                     |     |                                                                                      | <a href="#">153</a> | <a href="#">231</a> | <a href="#">21</a> |

|                     |                     |                    |                                          |     |  |                     |                     |                    |                    |
|---------------------|---------------------|--------------------|------------------------------------------|-----|--|---------------------|---------------------|--------------------|--------------------|
|                     |                     |                    |                                          |     |  |                     | <a href="#">11</a>  | <a href="#">54</a> | <a href="#">28</a> |
| 26                  | Not clustered       | PVX_015130         | variable surface protein Vir18-like      | 459 |  | <a href="#">431</a> | <a href="#">448</a> | <a href="#">23</a> |                    |
|                     |                     |                    |                                          |     |  | <a href="#">237</a> | <a href="#">388</a> | <a href="#">5</a>  |                    |
|                     |                     |                    |                                          |     |  | <a href="#">60</a>  | <a href="#">97</a>  | <a href="#">25</a> |                    |
|                     |                     |                    |                                          |     |  | <a href="#">103</a> | <a href="#">141</a> | <a href="#">10</a> |                    |
|                     |                     |                    |                                          |     |  | <a href="#">390</a> | <a href="#">413</a> | <a href="#">12</a> |                    |
|                     |                     |                    |                                          |     |  | <a href="#">158</a> | <a href="#">236</a> | <a href="#">21</a> |                    |
|                     |                     |                    |                                          |     |  | <a href="#">12</a>  | <a href="#">57</a>  | <a href="#">28</a> |                    |
| 27                  | H                   | PVX_068690         | variable surface protein Vir18, putative | 529 |  | <a href="#">474</a> | <a href="#">485</a> | <a href="#">19</a> |                    |
|                     |                     |                    |                                          |     |  | <a href="#">451</a> | <a href="#">474</a> | <a href="#">23</a> |                    |
|                     |                     |                    |                                          |     |  | <a href="#">491</a> | <a href="#">522</a> | <a href="#">21</a> |                    |
|                     |                     |                    |                                          |     |  | <a href="#">461</a> | <a href="#">473</a> | <a href="#">23</a> |                    |
|                     |                     |                    |                                          |     |  | <a href="#">60</a>  | <a href="#">96</a>  | <a href="#">25</a> |                    |
|                     |                     |                    |                                          |     |  | <a href="#">435</a> | <a href="#">446</a> | <a href="#">5</a>  |                    |
|                     |                     |                    |                                          |     |  | <a href="#">10</a>  | <a href="#">57</a>  | <a href="#">28</a> |                    |
| 28                  | H                   | PVX_013120         | variable surface protein Vir18, putative | 475 |  | <a href="#">421</a> | <a href="#">432</a> | <a href="#">19</a> |                    |
|                     |                     |                    |                                          |     |  | <a href="#">400</a> | <a href="#">420</a> | <a href="#">23</a> |                    |
|                     |                     |                    |                                          |     |  | <a href="#">433</a> | <a href="#">468</a> | <a href="#">21</a> |                    |
|                     |                     |                    |                                          |     |  | <a href="#">406</a> | <a href="#">419</a> | <a href="#">23</a> |                    |
|                     |                     |                    |                                          |     |  | <a href="#">417</a> | <a href="#">434</a> | <a href="#">74</a> |                    |
|                     |                     |                    |                                          |     |  | <a href="#">60</a>  | <a href="#">96</a>  | <a href="#">25</a> |                    |
|                     |                     |                    |                                          |     |  | <a href="#">381</a> | <a href="#">392</a> | <a href="#">5</a>  |                    |
| <a href="#">11</a>  | <a href="#">57</a>  | <a href="#">28</a> |                                          |     |  |                     |                     |                    |                    |
| 29                  | H                   | PVX_017145         | variable surface protein Vir18, putative | 478 |  | <a href="#">430</a> | <a href="#">441</a> | <a href="#">19</a> |                    |
|                     |                     |                    |                                          |     |  | <a href="#">406</a> | <a href="#">429</a> | <a href="#">23</a> |                    |
|                     |                     |                    |                                          |     |  | <a href="#">241</a> | <a href="#">280</a> | <a href="#">7</a>  |                    |
|                     |                     |                    |                                          |     |  | <a href="#">442</a> | <a href="#">478</a> | <a href="#">21</a> |                    |
|                     |                     |                    |                                          |     |  | <a href="#">108</a> | <a href="#">160</a> | <a href="#">10</a> |                    |
|                     |                     |                    |                                          |     |  | <a href="#">415</a> | <a href="#">428</a> | <a href="#">23</a> |                    |
|                     |                     |                    |                                          |     |  | <a href="#">426</a> | <a href="#">443</a> | <a href="#">74</a> |                    |
|                     |                     |                    |                                          |     |  | <a href="#">63</a>  | <a href="#">100</a> | <a href="#">25</a> |                    |
|                     |                     |                    |                                          |     |  | <a href="#">105</a> | <a href="#">137</a> | <a href="#">10</a> |                    |
|                     |                     |                    |                                          |     |  | <a href="#">239</a> | <a href="#">282</a> | <a href="#">7</a>  |                    |
| <a href="#">389</a> | <a href="#">401</a> | <a href="#">5</a>  |                                          |     |  |                     |                     |                    |                    |
| <a href="#">162</a> | <a href="#">228</a> | <a href="#">21</a> |                                          |     |  |                     |                     |                    |                    |
| <a href="#">18</a>  | <a href="#">56</a>  | <a href="#">28</a> |                                          |     |  |                     |                     |                    |                    |
| 30                  | H                   | PVX_062690         | variable surface protein Vir18, putative | 462 |  | <a href="#">414</a> | <a href="#">425</a> | <a href="#">19</a> |                    |
|                     |                     |                    |                                          |     |  | <a href="#">390</a> | <a href="#">413</a> | <a href="#">23</a> |                    |
|                     |                     |                    |                                          |     |  | <a href="#">212</a> | <a href="#">252</a> | <a href="#">7</a>  |                    |
|                     |                     |                    |                                          |     |  | <a href="#">426</a> | <a href="#">462</a> | <a href="#">21</a> |                    |
|                     |                     |                    |                                          |     |  | <a href="#">108</a> | <a href="#">160</a> | <a href="#">10</a> |                    |
|                     |                     |                    |                                          |     |  | <a href="#">399</a> | <a href="#">412</a> | <a href="#">23</a> |                    |
|                     |                     |                    |                                          |     |  | <a href="#">410</a> | <a href="#">427</a> | <a href="#">74</a> |                    |
| <a href="#">63</a>  | <a href="#">100</a> | <a href="#">25</a> |                                          |     |  |                     |                     |                    |                    |
| <a href="#">101</a> | <a href="#">133</a> | <a href="#">10</a> |                                          |     |  |                     |                     |                    |                    |

|                     |                     |                    |                                                     |     |                                                                                      |                     |                     |                    |
|---------------------|---------------------|--------------------|-----------------------------------------------------|-----|--------------------------------------------------------------------------------------|---------------------|---------------------|--------------------|
|                     |                     |                    |                                                     |     |                                                                                      | <a href="#">210</a> | <a href="#">253</a> | <a href="#">7</a>  |
|                     |                     |                    |                                                     |     |                                                                                      | <a href="#">373</a> | <a href="#">386</a> | <a href="#">5</a>  |
|                     |                     |                    |                                                     |     |                                                                                      | <a href="#">163</a> | <a href="#">207</a> | <a href="#">21</a> |
|                     |                     |                    |                                                     |     |                                                                                      | <a href="#">15</a>  | <a href="#">60</a>  | <a href="#">28</a> |
| 31                  | H                   | PVX_241295         | variable surface protein Vir18, putative            | 489 |    | <a href="#">435</a> | <a href="#">446</a> | <a href="#">19</a> |
|                     |                     |                    |                                                     |     |                                                                                      | <a href="#">411</a> | <a href="#">434</a> | <a href="#">23</a> |
|                     |                     |                    |                                                     |     |                                                                                      | <a href="#">245</a> | <a href="#">288</a> | <a href="#">7</a>  |
|                     |                     |                    |                                                     |     |                                                                                      | <a href="#">447</a> | <a href="#">482</a> | <a href="#">21</a> |
|                     |                     |                    |                                                     |     |                                                                                      | <a href="#">112</a> | <a href="#">165</a> | <a href="#">10</a> |
|                     |                     |                    |                                                     |     |                                                                                      | <a href="#">420</a> | <a href="#">433</a> | <a href="#">23</a> |
|                     |                     |                    |                                                     |     |                                                                                      | <a href="#">431</a> | <a href="#">448</a> | <a href="#">74</a> |
|                     |                     |                    |                                                     |     |                                                                                      | <a href="#">64</a>  | <a href="#">101</a> | <a href="#">25</a> |
|                     |                     |                    |                                                     |     |                                                                                      | <a href="#">247</a> | <a href="#">287</a> | <a href="#">7</a>  |
|                     |                     |                    |                                                     |     |                                                                                      | <a href="#">394</a> | <a href="#">407</a> | <a href="#">5</a>  |
|                     |                     |                    |                                                     |     |                                                                                      | <a href="#">167</a> | <a href="#">243</a> | <a href="#">21</a> |
|                     |                     |                    |                                                     |     |                                                                                      | <a href="#">20</a>  | <a href="#">61</a>  | <a href="#">28</a> |
|                     |                     |                    |                                                     |     |                                                                                      | 32                  | H                   | PVX_103150         |
| <a href="#">410</a> | <a href="#">432</a> | <a href="#">23</a> |                                                     |     |                                                                                      |                     |                     |                    |
| <a href="#">410</a> | <a href="#">433</a> | <a href="#">23</a> |                                                     |     |                                                                                      |                     |                     |                    |
| <a href="#">244</a> | <a href="#">287</a> | <a href="#">7</a>  |                                                     |     |                                                                                      |                     |                     |                    |
| <a href="#">446</a> | <a href="#">482</a> | <a href="#">21</a> |                                                     |     |                                                                                      |                     |                     |                    |
| <a href="#">111</a> | <a href="#">164</a> | <a href="#">10</a> |                                                     |     |                                                                                      |                     |                     |                    |
| <a href="#">419</a> | <a href="#">432</a> | <a href="#">23</a> |                                                     |     |                                                                                      |                     |                     |                    |
| <a href="#">63</a>  | <a href="#">100</a> | <a href="#">25</a> |                                                     |     |                                                                                      |                     |                     |                    |
| <a href="#">108</a> | <a href="#">154</a> | <a href="#">10</a> |                                                     |     |                                                                                      |                     |                     |                    |
| <a href="#">246</a> | <a href="#">286</a> | <a href="#">7</a>  |                                                     |     |                                                                                      |                     |                     |                    |
| <a href="#">166</a> | <a href="#">243</a> | <a href="#">21</a> |                                                     |     |                                                                                      |                     |                     |                    |
| <a href="#">18</a>  | <a href="#">60</a>  | <a href="#">28</a> |                                                     |     |                                                                                      |                     |                     |                    |
| 33                  | H                   | PVX_055190         | variable surface protein Vir18, truncated, putative | 378 |  |                     |                     |                    |
|                     |                     |                    |                                                     |     |                                                                                      | <a href="#">210</a> | <a href="#">253</a> | <a href="#">7</a>  |
|                     |                     |                    |                                                     |     |                                                                                      | <a href="#">77</a>  | <a href="#">130</a> | <a href="#">10</a> |
|                     |                     |                    |                                                     |     |                                                                                      | <a href="#">355</a> | <a href="#">368</a> | <a href="#">23</a> |
|                     |                     |                    |                                                     |     |                                                                                      | <a href="#">29</a>  | <a href="#">66</a>  | <a href="#">25</a> |
|                     |                     |                    |                                                     |     |                                                                                      | <a href="#">212</a> | <a href="#">252</a> | <a href="#">7</a>  |
|                     |                     |                    |                                                     |     |                                                                                      | <a href="#">135</a> | <a href="#">208</a> | <a href="#">21</a> |
|                     |                     |                    |                                                     |     |                                                                                      | <a href="#">1</a>   | <a href="#">24</a>  | <a href="#">28</a> |
|                     |                     |                    |                                                     |     |                                                                                      | <a href="#">441</a> | <a href="#">459</a> | <a href="#">23</a> |
|                     |                     |                    |                                                     |     |                                                                                      | <a href="#">451</a> | <a href="#">460</a> | <a href="#">23</a> |
|                     |                     |                    |                                                     |     |                                                                                      | <a href="#">407</a> | <a href="#">434</a> | <a href="#">12</a> |
|                     |                     |                    |                                                     |     |                                                                                      | <a href="#">29</a>  | <a href="#">53</a>  | <a href="#">10</a> |
|                     |                     |                    |                                                     |     |                                                                                      | <a href="#">126</a> | <a href="#">214</a> | <a href="#">21</a> |
| 34                  | Not clustered       | PVX_066190         | variable surface protein Vir18-like                 | 463 |  | <a href="#">232</a> | <a href="#">257</a> | <a href="#">14</a> |
|                     |                     |                    |                                                     |     |                                                                                      | <a href="#">122</a> | <a href="#">135</a> | <a href="#">20</a> |
|                     |                     |                    |                                                     |     |                                                                                      | <a href="#">122</a> | <a href="#">135</a> | <a href="#">20</a> |
| 1                   | D                   | PVX_074695         | variable surface protein Vir10, putative            | 257 |  | <a href="#">90</a>  | <a href="#">121</a> | <a href="#">18</a> |



|    |   |            |                                                     |     |  |  |                     |                     |                    |
|----|---|------------|-----------------------------------------------------|-----|--|--|---------------------|---------------------|--------------------|
|    |   |            |                                                     |     |  |  | <a href="#">87</a>  | <a href="#">109</a> | <a href="#">18</a> |
|    |   |            |                                                     |     |  |  | <a href="#">152</a> | <a href="#">178</a> | <a href="#">11</a> |
| 2  | D | PVX_109785 | variable surface protein Vir35, putative            | 261 |  |  | <a href="#">231</a> | <a href="#">258</a> | <a href="#">14</a> |
|    |   |            |                                                     |     |  |  | <a href="#">130</a> | <a href="#">157</a> | <a href="#">20</a> |
|    |   |            |                                                     |     |  |  | <a href="#">130</a> | <a href="#">150</a> | <a href="#">20</a> |
|    |   |            |                                                     |     |  |  | <a href="#">96</a>  | <a href="#">129</a> | <a href="#">18</a> |
|    |   |            |                                                     |     |  |  | <a href="#">94</a>  | <a href="#">116</a> | <a href="#">18</a> |
|    |   |            |                                                     |     |  |  | <a href="#">162</a> | <a href="#">183</a> | <a href="#">11</a> |
| 3  | D | PVX_103160 | variable surface protein Vir10-like                 | 254 |  |  | <a href="#">225</a> | <a href="#">252</a> | <a href="#">14</a> |
|    |   |            |                                                     |     |  |  | <a href="#">122</a> | <a href="#">135</a> | <a href="#">20</a> |
|    |   |            |                                                     |     |  |  | <a href="#">122</a> | <a href="#">135</a> | <a href="#">20</a> |
|    |   |            |                                                     |     |  |  | <a href="#">89</a>  | <a href="#">120</a> | <a href="#">18</a> |
|    |   |            |                                                     |     |  |  | <a href="#">88</a>  | <a href="#">109</a> | <a href="#">18</a> |
|    |   |            |                                                     |     |  |  | <a href="#">152</a> | <a href="#">178</a> | <a href="#">11</a> |
| 4  | D | PVX_182275 | variable surface protein Vir11, truncated, putative | 151 |  |  | <a href="#">124</a> | <a href="#">151</a> | <a href="#">14</a> |
|    |   |            |                                                     |     |  |  | <a href="#">17</a>  | <a href="#">44</a>  | <a href="#">20</a> |
|    |   |            |                                                     |     |  |  | <a href="#">17</a>  | <a href="#">42</a>  | <a href="#">20</a> |
|    |   |            |                                                     |     |  |  | <a href="#">1</a>   | <a href="#">16</a>  | <a href="#">18</a> |
|    |   |            |                                                     |     |  |  | <a href="#">47</a>  | <a href="#">73</a>  | <a href="#">11</a> |
| 5  | D | PVX_019665 | variable surface protein Vir11, putative            | 282 |  |  | <a href="#">255</a> | <a href="#">282</a> | <a href="#">14</a> |
|    |   |            |                                                     |     |  |  | <a href="#">130</a> | <a href="#">157</a> | <a href="#">20</a> |
|    |   |            |                                                     |     |  |  | <a href="#">130</a> | <a href="#">154</a> | <a href="#">20</a> |
|    |   |            |                                                     |     |  |  | <a href="#">95</a>  | <a href="#">129</a> | <a href="#">18</a> |
|    |   |            |                                                     |     |  |  | <a href="#">160</a> | <a href="#">186</a> | <a href="#">11</a> |
| 6  | D | PVX_178275 | variable surface protein Vir11, putative            | 267 |  |  | <a href="#">235</a> | <a href="#">262</a> | <a href="#">14</a> |
|    |   |            |                                                     |     |  |  | <a href="#">128</a> | <a href="#">155</a> | <a href="#">20</a> |
|    |   |            |                                                     |     |  |  | <a href="#">128</a> | <a href="#">151</a> | <a href="#">20</a> |
|    |   |            |                                                     |     |  |  | <a href="#">93</a>  | <a href="#">127</a> | <a href="#">18</a> |
|    |   |            |                                                     |     |  |  | <a href="#">158</a> | <a href="#">181</a> | <a href="#">11</a> |
| 7  | D | PVX_146260 | variable surface protein Vir11, putative            | 239 |  |  | <a href="#">218</a> | <a href="#">236</a> | <a href="#">14</a> |
|    |   |            |                                                     |     |  |  | <a href="#">129</a> | <a href="#">156</a> | <a href="#">20</a> |
|    |   |            |                                                     |     |  |  | <a href="#">129</a> | <a href="#">151</a> | <a href="#">20</a> |
|    |   |            |                                                     |     |  |  | <a href="#">94</a>  | <a href="#">128</a> | <a href="#">18</a> |
|    |   |            |                                                     |     |  |  | <a href="#">159</a> | <a href="#">182</a> | <a href="#">11</a> |
| 8  | D | PVX_041190 | variable surface protein Vir35, truncated, putative | 144 |  |  | <a href="#">114</a> | <a href="#">141</a> | <a href="#">14</a> |
|    |   |            |                                                     |     |  |  | <a href="#">13</a>  | <a href="#">40</a>  | <a href="#">20</a> |
|    |   |            |                                                     |     |  |  | <a href="#">13</a>  | <a href="#">33</a>  | <a href="#">20</a> |
|    |   |            |                                                     |     |  |  | <a href="#">45</a>  | <a href="#">69</a>  | <a href="#">11</a> |
| 9  | D | PVX_086850 | variable surface protein Vir35, putative            | 245 |  |  | <a href="#">215</a> | <a href="#">242</a> | <a href="#">14</a> |
|    |   |            |                                                     |     |  |  | <a href="#">113</a> | <a href="#">139</a> | <a href="#">20</a> |
|    |   |            |                                                     |     |  |  | <a href="#">113</a> | <a href="#">136</a> | <a href="#">20</a> |
|    |   |            |                                                     |     |  |  | <a href="#">78</a>  | <a href="#">111</a> | <a href="#">18</a> |
| 10 | D | PVX_109780 | variable surface protein Vir35, putative            | 266 |  |  | <a href="#">239</a> | <a href="#">266</a> | <a href="#">14</a> |
|    |   |            |                                                     |     |  |  | <a href="#">114</a> | <a href="#">140</a> | <a href="#">20</a> |
|    |   |            |                                                     |     |  |  | <a href="#">114</a> | <a href="#">136</a> | <a href="#">20</a> |

|    |             |            |                                                     |     |                                                                                      |                     |                     |                    |
|----|-------------|------------|-----------------------------------------------------|-----|--------------------------------------------------------------------------------------|---------------------|---------------------|--------------------|
|    |             |            |                                                     |     |                                                                                      | <a href="#">82</a>  | <a href="#">110</a> | <a href="#">18</a> |
|    |             |            |                                                     |     |                                                                                      | <a href="#">82</a>  | <a href="#">99</a>  | <a href="#">18</a> |
|    |             |            |                                                     |     |                                                                                      | <a href="#">227</a> | <a href="#">243</a> | <a href="#">7</a>  |
|    |             |            |                                                     |     |                                                                                      | <a href="#">144</a> | <a href="#">168</a> | <a href="#">11</a> |
|    |             |            |                                                     |     |                                                                                      | <a href="#">85</a>  | <a href="#">96</a>  | <a href="#">4</a>  |
| 11 | D           | PVX_108760 | variable surface protein Vir35, putative            | 261 |    | <a href="#">122</a> | <a href="#">148</a> | <a href="#">20</a> |
|    |             |            |                                                     |     |                                                                                      | <a href="#">125</a> | <a href="#">145</a> | <a href="#">20</a> |
|    |             |            |                                                     |     |                                                                                      | <a href="#">87</a>  | <a href="#">120</a> | <a href="#">18</a> |
|    |             |            |                                                     |     |                                                                                      | <a href="#">236</a> | <a href="#">252</a> | <a href="#">7</a>  |
|    |             |            |                                                     |     |                                                                                      | <a href="#">158</a> | <a href="#">176</a> | <a href="#">11</a> |
|    |             |            |                                                     |     |                                                                                      | <a href="#">94</a>  | <a href="#">104</a> | <a href="#">4</a>  |
| 12 | D           | PVX_067190 | variable surface protein Vir35, putative            | 235 |    | <a href="#">208</a> | <a href="#">234</a> | <a href="#">14</a> |
|    |             |            |                                                     |     |                                                                                      | <a href="#">85</a>  | <a href="#">112</a> | <a href="#">20</a> |
|    |             |            |                                                     |     |                                                                                      | <a href="#">85</a>  | <a href="#">107</a> | <a href="#">20</a> |
|    |             |            |                                                     |     |                                                                                      | <a href="#">51</a>  | <a href="#">80</a>  | <a href="#">18</a> |
|    |             |            |                                                     |     |                                                                                      | <a href="#">50</a>  | <a href="#">70</a>  | <a href="#">18</a> |
|    |             |            |                                                     |     |                                                                                      | <a href="#">57</a>  | <a href="#">68</a>  | <a href="#">4</a>  |
| 13 | Unavailable | PVX_109778 | variable surface protein Vir, putative              | 240 |    | <a href="#">130</a> | <a href="#">153</a> | <a href="#">20</a> |
|    |             |            |                                                     |     |                                                                                      | <a href="#">130</a> | <a href="#">153</a> | <a href="#">20</a> |
|    |             |            |                                                     |     |                                                                                      | <a href="#">95</a>  | <a href="#">129</a> | <a href="#">18</a> |
| 14 | D           | PVX_040690 | variable surface protein Vir35, putative            | 166 |  | <a href="#">122</a> | <a href="#">149</a> | <a href="#">20</a> |
|    |             |            |                                                     |     |                                                                                      | <a href="#">122</a> | <a href="#">146</a> | <a href="#">20</a> |
|    |             |            |                                                     |     |                                                                                      | <a href="#">91</a>  | <a href="#">117</a> | <a href="#">18</a> |
|    |             |            |                                                     |     |                                                                                      | <a href="#">94</a>  | <a href="#">105</a> | <a href="#">4</a>  |
| 15 | D           | PVX_143260 | variable surface protein Vir35, putative            | 248 |  | <a href="#">119</a> | <a href="#">145</a> | <a href="#">20</a> |
|    |             |            |                                                     |     |                                                                                      | <a href="#">119</a> | <a href="#">141</a> | <a href="#">20</a> |
|    |             |            |                                                     |     |                                                                                      | <a href="#">86</a>  | <a href="#">118</a> | <a href="#">18</a> |
|    |             |            |                                                     |     |                                                                                      | <a href="#">83</a>  | <a href="#">106</a> | <a href="#">18</a> |
|    |             |            |                                                     |     |                                                                                      | <a href="#">205</a> | <a href="#">225</a> | <a href="#">7</a>  |
| 16 | D           | PVX_017645 | variable surface protein Vir35, putative            | 230 |  | <a href="#">101</a> | <a href="#">127</a> | <a href="#">20</a> |
|    |             |            |                                                     |     |                                                                                      | <a href="#">101</a> | <a href="#">122</a> | <a href="#">20</a> |
|    |             |            |                                                     |     |                                                                                      | <a href="#">68</a>  | <a href="#">100</a> | <a href="#">18</a> |
|    |             |            |                                                     |     |                                                                                      | <a href="#">65</a>  | <a href="#">88</a>  | <a href="#">18</a> |
|    |             |            |                                                     |     |                                                                                      | <a href="#">187</a> | <a href="#">207</a> | <a href="#">7</a>  |
| 17 | D           | PVX_103145 | variable surface protein Vir10, putative            | 168 |  | <a href="#">101</a> | <a href="#">128</a> | <a href="#">20</a> |
|    |             |            |                                                     |     |                                                                                      | <a href="#">101</a> | <a href="#">126</a> | <a href="#">20</a> |
|    |             |            |                                                     |     |                                                                                      | <a href="#">68</a>  | <a href="#">100</a> | <a href="#">18</a> |
|    |             |            |                                                     |     |                                                                                      | <a href="#">65</a>  | <a href="#">88</a>  | <a href="#">18</a> |
|    |             |            |                                                     |     |                                                                                      | <a href="#">134</a> | <a href="#">145</a> | <a href="#">7</a>  |
| 18 | D           | PVX_047690 | variable surface protein Vir10, truncated, putative | 267 |  | <a href="#">237</a> | <a href="#">264</a> | <a href="#">14</a> |
|    |             |            |                                                     |     |                                                                                      | <a href="#">135</a> | <a href="#">162</a> | <a href="#">20</a> |
|    |             |            |                                                     |     |                                                                                      | <a href="#">135</a> | <a href="#">155</a> | <a href="#">20</a> |
|    |             |            |                                                     |     |                                                                                      | <a href="#">101</a> | <a href="#">134</a> | <a href="#">18</a> |
|    |             |            |                                                     |     |                                                                                      | <a href="#">99</a>  | <a href="#">122</a> | <a href="#">18</a> |
|    |             |            |                                                     |     |                                                                                      | <a href="#">226</a> | <a href="#">241</a> | <a href="#">7</a>  |

|     |               |            |                                                        |     |  |     |     |    |
|-----|---------------|------------|--------------------------------------------------------|-----|--|-----|-----|----|
| 19  | D             | PVX_038690 | variable surface protein Vir35-like                    | 199 |  | 105 | 128 | 20 |
|     |               |            |                                                        |     |  | 105 | 122 | 20 |
|     |               |            |                                                        |     |  | 73  | 103 | 18 |
|     |               |            |                                                        |     |  | 71  | 90  | 18 |
| 20  | D             | PVX_102635 | variable surface protein Vir10-related                 | 198 |  | 85  | 108 | 20 |
|     |               |            |                                                        |     |  | 85  | 102 | 20 |
|     |               |            |                                                        |     |  | 53  | 70  | 18 |
| 21  | Not clustered | PVX_058190 | variable surface protein Vir10/35, truncated, putative | 123 |  | 94  | 121 | 14 |
| 1   | Not clustered | PVX_096005 | variable surface protein Vir15-related                 | 367 |  | 1   | 15  | 11 |
|     |               |            |                                                        |     |  | 97  | 104 | 72 |
|     |               |            |                                                        |     |  | 96  | 105 | 72 |
|     |               |            |                                                        |     |  | 98  | 106 | 72 |
| 2   | Not clustered | PVX_121355 | variable surface protein Vir15-like                    | 222 |  | 284 | 303 | 74 |
|     |               |            |                                                        |     |  | 132 | 158 | 5  |
|     |               |            |                                                        |     |  | 165 | 195 | 74 |
| 3   | J             | PVX_057690 | variable surface protein Vir33, putative               | 301 |  | 80  | 92  | 21 |
|     |               |            |                                                        |     |  | 120 | 199 | 40 |
|     |               |            |                                                        |     |  | 80  | 92  | 21 |
|     |               |            |                                                        |     |  | 80  | 92  | 21 |
|     |               |            |                                                        |     |  | 7   | 69  | 11 |
|     |               |            |                                                        |     |  | 122 | 179 | 40 |
|     |               |            |                                                        |     |  | 241 | 271 | 74 |
|     |               |            |                                                        |     |  | 80  | 92  | 21 |
| 184 | 202           | 17         |                                                        |     |  |     |     |    |
| 4   | J             | PVX_109795 | variable surface protein Vir33, putative               | 301 |  | 77  | 93  | 21 |
|     |               |            |                                                        |     |  | 76  | 94  | 21 |
|     |               |            |                                                        |     |  | 77  | 94  | 21 |
|     |               |            |                                                        |     |  | 7   | 69  | 11 |
|     |               |            |                                                        |     |  | 122 | 179 | 40 |
|     |               |            |                                                        |     |  | 241 | 271 | 74 |
| 5   | J             | PVX_070690 | variable surface protein Vir33, truncated, putative    | 260 |  | 77  | 94  | 21 |
|     |               |            |                                                        |     |  | 184 | 202 | 17 |
|     |               |            |                                                        |     |  | 42  | 58  | 21 |
|     |               |            |                                                        |     |  | 42  | 54  | 21 |
|     |               |            |                                                        |     |  | 41  | 59  | 21 |
|     |               |            |                                                        |     |  | 42  | 59  | 21 |
| 6   | J             | PVX_067690 | variable surface protein Vir1-like                     | 266 |  | 2   | 33  | 11 |
|     |               |            |                                                        |     |  | 87  | 144 | 40 |
|     |               |            |                                                        |     |  | 42  | 59  | 21 |
|     |               |            |                                                        |     |  | 149 | 167 | 17 |
| 7   | J             | PVX_105710 | variable surface                                       | 245 |  | 6   | 110 | 11 |
|     |               |            |                                                        |     |  | 112 | 171 | 40 |
|     |               |            |                                                        |     |  | 175 | 192 | 17 |
|     |               |            |                                                        |     |  | 6   | 106 | 11 |

|    |               |            |                                                      |     |                                                                                      |  |                     |                     |                    |
|----|---------------|------------|------------------------------------------------------|-----|--------------------------------------------------------------------------------------|--|---------------------|---------------------|--------------------|
|    |               |            |                                                      |     |                                                                                      |  | <a href="#">120</a> | <a href="#">200</a> | <a href="#">40</a> |
|    |               |            |                                                      |     |                                                                                      |  | <a href="#">113</a> | <a href="#">171</a> | <a href="#">40</a> |
|    |               |            |                                                      |     |                                                                                      |  | <a href="#">121</a> | <a href="#">143</a> | <a href="#">40</a> |
|    |               |            |                                                      |     |                                                                                      |  | <a href="#">176</a> | <a href="#">194</a> | <a href="#">17</a> |
| 8  | J             | PVX_000020 | variable surface protein Vir9-like                   | 234 | 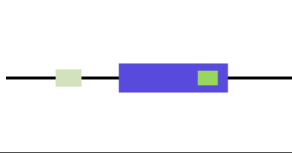   |  | <a href="#">99</a>  | <a href="#">181</a> | <a href="#">40</a> |
|    |               |            |                                                      |     |                                                                                      |  | <a href="#">41</a>  | <a href="#">61</a>  | <a href="#">21</a> |
|    |               |            |                                                      |     |                                                                                      |  | <a href="#">93</a>  | <a href="#">150</a> | <a href="#">40</a> |
|    |               |            |                                                      |     |                                                                                      |  | <a href="#">157</a> | <a href="#">173</a> | <a href="#">17</a> |
| 9  | J             | PVX_096930 | variable surface protein Vir1-related, truncated     | 248 |    |  | <a href="#">1</a>   | <a href="#">106</a> | <a href="#">11</a> |
|    |               |            |                                                      |     |                                                                                      |  | <a href="#">112</a> | <a href="#">195</a> | <a href="#">40</a> |
|    |               |            |                                                      |     |                                                                                      |  | <a href="#">73</a>  | <a href="#">82</a>  | <a href="#">21</a> |
|    |               |            |                                                      |     |                                                                                      |  | <a href="#">108</a> | <a href="#">167</a> | <a href="#">40</a> |
| 10 | Not clustered | PVX_106720 | variable surface protein Vir33 (truncated), putative | 220 |    |  | <a href="#">166</a> | <a href="#">182</a> | <a href="#">74</a> |
|    |               |            |                                                      |     |                                                                                      |  | <a href="#">166</a> | <a href="#">182</a> | <a href="#">74</a> |
|    |               |            |                                                      |     |                                                                                      |  | <a href="#">168</a> | <a href="#">183</a> | <a href="#">74</a> |
|    |               |            |                                                      |     |                                                                                      |  | <a href="#">9</a>   | <a href="#">39</a>  | <a href="#">40</a> |
|    |               |            |                                                      |     |                                                                                      |  | <a href="#">168</a> | <a href="#">181</a> | <a href="#">74</a> |
|    |               |            |                                                      |     |                                                                                      |  | <a href="#">171</a> | <a href="#">183</a> | <a href="#">74</a> |
|    |               |            |                                                      |     |                                                                                      |  | <a href="#">115</a> | <a href="#">127</a> | <a href="#">17</a> |
| 11 | J             | PVX_096935 | variable surface protein Vir9-related                | 304 |    |  | <a href="#">250</a> | <a href="#">266</a> | <a href="#">74</a> |
|    |               |            |                                                      |     |                                                                                      |  | <a href="#">250</a> | <a href="#">266</a> | <a href="#">74</a> |
|    |               |            |                                                      |     |                                                                                      |  | <a href="#">29</a>  | <a href="#">131</a> | <a href="#">11</a> |
|    |               |            |                                                      |     |                                                                                      |  | <a href="#">133</a> | <a href="#">192</a> | <a href="#">40</a> |
|    |               |            |                                                      |     |                                                                                      |  | <a href="#">254</a> | <a href="#">269</a> | <a href="#">74</a> |
|    |               |            |                                                      |     |                                                                                      |  | <a href="#">256</a> | <a href="#">266</a> | <a href="#">74</a> |
|    |               |            |                                                      |     |                                                                                      |  | <a href="#">257</a> | <a href="#">269</a> | <a href="#">74</a> |
|    |               |            |                                                      |     |                                                                                      |  | <a href="#">257</a> | <a href="#">269</a> | <a href="#">74</a> |
| 12 | Unavailable   | PVX_096925 | variable surface protein Vir15-like                  | 289 |   |  | <a href="#">93</a>  | <a href="#">191</a> | <a href="#">40</a> |
|    |               |            |                                                      |     |                                                                                      |  | <a href="#">98</a>  | <a href="#">153</a> | <a href="#">40</a> |
|    |               |            |                                                      |     |                                                                                      |  | <a href="#">60</a>  | <a href="#">68</a>  | <a href="#">72</a> |
|    |               |            |                                                      |     |                                                                                      |  | <a href="#">257</a> | <a href="#">269</a> | <a href="#">74</a> |
|    |               |            |                                                      |     |                                                                                      |  | <a href="#">258</a> | <a href="#">269</a> | <a href="#">74</a> |
|    |               |            |                                                      |     |                                                                                      |  | <a href="#">59</a>  | <a href="#">68</a>  | <a href="#">21</a> |
|    |               |            |                                                      |     |                                                                                      |  | <a href="#">60</a>  | <a href="#">68</a>  | <a href="#">72</a> |
|    |               |            |                                                      |     |                                                                                      |  | <a href="#">157</a> | <a href="#">172</a> | <a href="#">17</a> |
| 13 | J             | PVX_167265 | variable surface protein Vir15, truncated, putative  | 278 |  |  | <a href="#">195</a> | <a href="#">216</a> | <a href="#">5</a>  |
|    |               |            |                                                      |     |                                                                                      |  | <a href="#">108</a> | <a href="#">184</a> | <a href="#">40</a> |
|    |               |            |                                                      |     |                                                                                      |  | <a href="#">223</a> | <a href="#">248</a> | <a href="#">74</a> |
|    |               |            |                                                      |     |                                                                                      |  | <a href="#">107</a> | <a href="#">162</a> | <a href="#">40</a> |
|    |               |            |                                                      |     |                                                                                      |  | <a href="#">223</a> | <a href="#">251</a> | <a href="#">74</a> |
|    |               |            |                                                      |     |                                                                                      |  | <a href="#">168</a> | <a href="#">184</a> | <a href="#">17</a> |
| 14 | J             | PVX_010605 | variable surface protein Vir15, putative             | 286 |  |  | <a href="#">194</a> | <a href="#">221</a> | <a href="#">5</a>  |
|    |               |            |                                                      |     |                                                                                      |  | <a href="#">228</a> | <a href="#">253</a> | <a href="#">74</a> |
|    |               |            |                                                      |     |                                                                                      |  | <a href="#">110</a> | <a href="#">165</a> | <a href="#">40</a> |
|    |               |            |                                                      |     |                                                                                      |  | <a href="#">227</a> | <a href="#">257</a> | <a href="#">74</a> |

|    |               |            |                                                      |     |                                                                                      |  |                     |                     |                    |
|----|---------------|------------|------------------------------------------------------|-----|--------------------------------------------------------------------------------------|--|---------------------|---------------------|--------------------|
|    |               |            |                                                      |     |                                                                                      |  | <a href="#">224</a> | <a href="#">244</a> | <a href="#">74</a> |
|    |               |            |                                                      |     |                                                                                      |  | <a href="#">172</a> | <a href="#">188</a> | <a href="#">17</a> |
| 15 | Not clustered | PVX_186290 | variable surface protein Vir15-related, truncated    | 133 |    |  | <a href="#">42</a>  | <a href="#">68</a>  | <a href="#">5</a>  |
|    |               |            |                                                      |     |                                                                                      |  | <a href="#">3</a>   | <a href="#">40</a>  | <a href="#">40</a> |
|    |               |            |                                                      |     |                                                                                      |  | <a href="#">75</a>  | <a href="#">96</a>  | <a href="#">74</a> |
|    |               |            |                                                      |     |                                                                                      |  | <a href="#">70</a>  | <a href="#">88</a>  | <a href="#">74</a> |
|    |               |            |                                                      |     |                                                                                      |  | <a href="#">21</a>  | <a href="#">33</a>  | <a href="#">17</a> |
| 16 | Unavailable   | PVX_168270 | variable surface protein Vir15, pseudogene, putative | 343 |    |  | <a href="#">290</a> | <a href="#">308</a> | <a href="#">74</a> |
|    |               |            |                                                      |     |                                                                                      |  | <a href="#">129</a> | <a href="#">184</a> | <a href="#">40</a> |
|    |               |            |                                                      |     |                                                                                      |  | <a href="#">191</a> | <a href="#">207</a> | <a href="#">17</a> |
| 17 | J             | PVX_107750 | variable surface protein Vir2/15-like                | 301 |    |  | <a href="#">207</a> | <a href="#">232</a> | <a href="#">5</a>  |
|    |               |            |                                                      |     |                                                                                      |  | <a href="#">8</a>   | <a href="#">102</a> | <a href="#">11</a> |
|    |               |            |                                                      |     |                                                                                      |  | <a href="#">7</a>   | <a href="#">65</a>  | <a href="#">11</a> |
|    |               |            |                                                      |     |                                                                                      |  | <a href="#">124</a> | <a href="#">178</a> | <a href="#">40</a> |
|    |               |            |                                                      |     |                                                                                      |  | <a href="#">240</a> | <a href="#">270</a> | <a href="#">74</a> |
|    |               |            |                                                      |     |                                                                                      |  | <a href="#">167</a> | <a href="#">178</a> | <a href="#">40</a> |
|    |               |            |                                                      |     |                                                                                      |  | <a href="#">183</a> | <a href="#">201</a> | <a href="#">17</a> |
|    |               |            |                                                      |     |                                                                                      |  | <a href="#">80</a>  | <a href="#">88</a>  | <a href="#">72</a> |
|    |               |            |                                                      |     |                                                                                      |  | <a href="#">6</a>   | <a href="#">110</a> | <a href="#">11</a> |
|    |               |            |                                                      |     |                                                                                      |  | <a href="#">78</a>  | <a href="#">87</a>  | <a href="#">21</a> |
| 18 |               | PVX_105705 | hypothetical protein                                 | 191 |  |  | <a href="#">114</a> | <a href="#">172</a> | <a href="#">40</a> |
|    |               |            |                                                      |     |                                                                                      |  | <a href="#">78</a>  | <a href="#">90</a>  | <a href="#">72</a> |
|    |               |            |                                                      |     |                                                                                      |  | <a href="#">78</a>  | <a href="#">86</a>  | <a href="#">21</a> |
|    |               |            |                                                      |     |                                                                                      |  | <a href="#">78</a>  | <a href="#">86</a>  | <a href="#">72</a> |
|    |               |            |                                                      |     |                                                                                      |  | <a href="#">78</a>  | <a href="#">84</a>  | <a href="#">72</a> |
|    |               |            |                                                      |     |                                                                                      |  | <a href="#">78</a>  | <a href="#">88</a>  | <a href="#">72</a> |
|    |               |            |                                                      |     |                                                                                      |  | <a href="#">78</a>  | <a href="#">87</a>  | <a href="#">72</a> |
| 19 | Unavailable   | PVX_185285 | variable surface protein Vir2, truncated, putative   | 345 |  |  | <a href="#">238</a> | <a href="#">262</a> | <a href="#">13</a> |
|    |               |            |                                                      |     |                                                                                      |  | <a href="#">191</a> | <a href="#">208</a> | <a href="#">17</a> |
| 1  | Not clustered | PVX_032690 | variable surface protein Vir7, putative              | 156 |  |  | <a href="#">100</a> | <a href="#">112</a> | <a href="#">74</a> |
|    |               |            |                                                      |     |                                                                                      |  | <a href="#">82</a>  | <a href="#">103</a> | <a href="#">9</a>  |
|    |               |            |                                                      |     |                                                                                      |  | <a href="#">100</a> | <a href="#">112</a> | <a href="#">74</a> |
|    |               |            |                                                      |     |                                                                                      |  | <a href="#">82</a>  | <a href="#">104</a> | <a href="#">9</a>  |
|    |               |            |                                                      |     |                                                                                      |  | <a href="#">142</a> | <a href="#">154</a> | <a href="#">8</a>  |
|    |               |            |                                                      |     |                                                                                      |  | <a href="#">83</a>  | <a href="#">104</a> | <a href="#">9</a>  |
|    |               |            |                                                      |     |                                                                                      |  | <a href="#">105</a> | <a href="#">119</a> | <a href="#">15</a> |
|    |               |            |                                                      |     |                                                                                      |  | <a href="#">122</a> | <a href="#">138</a> | <a href="#">6</a>  |
| 2  | Not clustered | PVX_054690 | variable surface protein Vir29, truncated, putative  | 51  |  |  | <a href="#">37</a>  | <a href="#">49</a>  | <a href="#">8</a>  |
|    |               |            |                                                      |     |                                                                                      |  | <a href="#">2</a>   | <a href="#">26</a>  | <a href="#">15</a> |
|    |               |            |                                                      |     |                                                                                      |  | <a href="#">1</a>   | <a href="#">15</a>  | <a href="#">15</a> |
|    |               |            |                                                      |     |                                                                                      |  | <a href="#">16</a>  | <a href="#">35</a>  | <a href="#">6</a>  |
| 3  | I             | PVX_150260 | variable surface protein Vir27, truncated,           | 361 |  |  | <a href="#">60</a>  | <a href="#">66</a>  | <a href="#">8</a>  |
|    |               |            |                                                      |     |                                                                                      |  | <a href="#">327</a> | <a href="#">350</a> | <a href="#">15</a> |
|    |               |            |                                                      |     |                                                                                      |  | <a href="#">314</a> | <a href="#">350</a> | <a href="#">15</a> |



|                    |                     |                    |                                                     |     |                                                                                      |                     |                     |                     |                    |
|--------------------|---------------------|--------------------|-----------------------------------------------------|-----|--------------------------------------------------------------------------------------|---------------------|---------------------|---------------------|--------------------|
|                    |                     |                    |                                                     |     |                                                                                      |                     | <a href="#">80</a>  | <a href="#">192</a> | <a href="#">12</a> |
|                    |                     |                    |                                                     |     |                                                                                      |                     | <a href="#">283</a> | <a href="#">297</a> | <a href="#">13</a> |
|                    |                     |                    |                                                     |     |                                                                                      |                     | <a href="#">80</a>  | <a href="#">192</a> | <a href="#">12</a> |
| 7                  | Not clustered       | PVX_055690         | variable surface protein Vir27, truncated, putative | 192 | 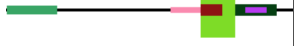   | <a href="#">131</a> | <a href="#">153</a> | <a href="#">74</a>  |                    |
|                    |                     |                    |                                                     |     |                                                                                      | <a href="#">131</a> | <a href="#">153</a> | <a href="#">74</a>  |                    |
|                    |                     |                    |                                                     |     |                                                                                      | <a href="#">154</a> | <a href="#">181</a> | <a href="#">15</a>  |                    |
|                    |                     |                    |                                                     |     |                                                                                      | <a href="#">145</a> | <a href="#">181</a> | <a href="#">15</a>  |                    |
|                    |                     |                    |                                                     |     |                                                                                      | <a href="#">161</a> | <a href="#">174</a> | <a href="#">6</a>   |                    |
|                    |                     |                    |                                                     |     |                                                                                      | <a href="#">111</a> | <a href="#">130</a> | <a href="#">6</a>   |                    |
|                    |                     |                    |                                                     |     |                                                                                      | <a href="#">141</a> | <a href="#">153</a> | <a href="#">74</a>  |                    |
|                    |                     |                    |                                                     |     |                                                                                      | <a href="#">1</a>   | <a href="#">34</a>  | <a href="#">12</a>  |                    |
|                    |                     |                    |                                                     |     |                                                                                      | <a href="#">131</a> | <a href="#">144</a> | <a href="#">13</a>  |                    |
|                    |                     |                    |                                                     |     |                                                                                      | <a href="#">1</a>   | <a href="#">34</a>  | <a href="#">12</a>  |                    |
| 8                  | I                   | PVX_002495         | variable surface protein Vir7-like                  | 324 |    | <a href="#">130</a> | <a href="#">146</a> | <a href="#">39</a>  |                    |
|                    |                     |                    |                                                     |     |                                                                                      | <a href="#">17</a>  | <a href="#">53</a>  | <a href="#">8</a>   |                    |
|                    |                     |                    |                                                     |     |                                                                                      | <a href="#">76</a>  | <a href="#">85</a>  | <a href="#">72</a>  |                    |
|                    |                     |                    |                                                     |     |                                                                                      | <a href="#">184</a> | <a href="#">210</a> | <a href="#">6</a>   |                    |
|                    |                     |                    |                                                     |     |                                                                                      | <a href="#">136</a> | <a href="#">147</a> | <a href="#">39</a>  |                    |
|                    |                     |                    |                                                     |     |                                                                                      | <a href="#">184</a> | <a href="#">210</a> | <a href="#">6</a>   |                    |
|                    |                     |                    |                                                     |     |                                                                                      | <a href="#">97</a>  | <a href="#">206</a> | <a href="#">12</a>  |                    |
|                    |                     |                    |                                                     |     |                                                                                      | <a href="#">97</a>  | <a href="#">206</a> | <a href="#">12</a>  |                    |
|                    |                     |                    |                                                     |     |                                                                                      | <a href="#">74</a>  | <a href="#">85</a>  | <a href="#">72</a>  |                    |
|                    |                     |                    |                                                     |     |                                                                                      | <a href="#">61</a>  | <a href="#">68</a>  | <a href="#">8</a>   |                    |
| 9                  | Not clustered       | PVX_048190         | variable surface protein Vir27, truncated, putative | 117 |  | <a href="#">1</a>   | <a href="#">57</a>  | <a href="#">8</a>   |                    |
|                    |                     |                    |                                                     |     |                                                                                      | <a href="#">19</a>  | <a href="#">42</a>  | <a href="#">8</a>   |                    |
|                    |                     |                    |                                                     |     |                                                                                      | <a href="#">81</a>  | <a href="#">92</a>  | <a href="#">72</a>  |                    |
|                    |                     |                    |                                                     |     |                                                                                      | <a href="#">29</a>  | <a href="#">50</a>  | <a href="#">8</a>   |                    |
|                    |                     |                    |                                                     |     |                                                                                      | <a href="#">101</a> | <a href="#">115</a> | <a href="#">12</a>  |                    |
|                    |                     |                    |                                                     |     |                                                                                      | <a href="#">101</a> | <a href="#">117</a> | <a href="#">12</a>  |                    |
|                    |                     |                    |                                                     |     |                                                                                      | <a href="#">81</a>  | <a href="#">93</a>  | <a href="#">72</a>  |                    |
|                    |                     |                    |                                                     |     |                                                                                      | <a href="#">30</a>  | <a href="#">46</a>  | <a href="#">8</a>   |                    |
|                    |                     |                    |                                                     |     |                                                                                      | <a href="#">3</a>   | <a href="#">27</a>  | <a href="#">8</a>   |                    |
|                    |                     |                    |                                                     |     |                                                                                      | <a href="#">265</a> | <a href="#">285</a> | <a href="#">9</a>   |                    |
| 10                 | I                   | PVX_177275         | variable surface protein Vir7, putative             | 328 |  | <a href="#">265</a> | <a href="#">286</a> | <a href="#">9</a>   |                    |
|                    |                     |                    |                                                     |     |                                                                                      | <a href="#">265</a> | <a href="#">286</a> | <a href="#">9</a>   |                    |
|                    |                     |                    |                                                     |     |                                                                                      | <a href="#">102</a> | <a href="#">131</a> | <a href="#">12</a>  |                    |
|                    |                     |                    |                                                     |     |                                                                                      | <a href="#">265</a> | <a href="#">286</a> | <a href="#">9</a>   |                    |
|                    |                     |                    |                                                     |     |                                                                                      | <a href="#">287</a> | <a href="#">300</a> | <a href="#">15</a>  |                    |
|                    |                     |                    |                                                     |     |                                                                                      | <a href="#">49</a>  | <a href="#">59</a>  | <a href="#">72</a>  |                    |
|                    |                     |                    |                                                     |     |                                                                                      | <a href="#">132</a> | <a href="#">152</a> | <a href="#">6</a>   |                    |
|                    |                     |                    |                                                     |     |                                                                                      | <a href="#">156</a> | <a href="#">190</a> | <a href="#">6</a>   |                    |
|                    |                     |                    |                                                     |     |                                                                                      | <a href="#">156</a> | <a href="#">190</a> | <a href="#">6</a>   |                    |
|                    |                     |                    |                                                     |     |                                                                                      | <a href="#">71</a>  | <a href="#">183</a> | <a href="#">12</a>  |                    |
| <a href="#">63</a> | <a href="#">100</a> | <a href="#">5</a>  |                                                     |     |                                                                                      |                     |                     |                     |                    |
| <a href="#">71</a> | <a href="#">183</a> | <a href="#">12</a> |                                                     |     |                                                                                      |                     |                     |                     |                    |
| <a href="#">63</a> | <a href="#">100</a> | <a href="#">5</a>  |                                                     |     |                                                                                      |                     |                     |                     |                    |

|     |     |            |                                         |     |                                                                                      |     |     |            |
|-----|-----|------------|-----------------------------------------|-----|--------------------------------------------------------------------------------------|-----|-----|------------|
| 11  | I   | PVX_064190 | variable surface protein Vir7, putative | 364 |    | 303 | 319 | 6          |
|     |     |            |                                         |     |                                                                                      | 56  | 68  | 8          |
|     |     |            |                                         |     |                                                                                      | 1   | 54  | 8          |
|     |     |            |                                         |     |                                                                                      | 290 | 311 | 9          |
|     |     |            |                                         |     |                                                                                      | 290 | 312 | 9          |
|     |     |            |                                         |     |                                                                                      | 350 | 362 | 8          |
|     |     |            |                                         |     |                                                                                      | 129 | 159 | 12         |
|     |     |            |                                         |     |                                                                                      | 291 | 312 | 9          |
|     |     |            |                                         |     |                                                                                      | 313 | 327 | 15         |
|     |     |            |                                         |     |                                                                                      | 76  | 85  | 72         |
|     |     |            |                                         |     |                                                                                      | 160 | 180 | 6          |
|     |     |            |                                         |     |                                                                                      | 181 | 215 | 6          |
|     |     |            |                                         |     |                                                                                      | 181 | 215 | 6          |
|     |     |            |                                         |     |                                                                                      | 97  | 208 | 12         |
|     |     |            |                                         |     |                                                                                      | 89  | 127 | 5          |
|     |     |            |                                         |     |                                                                                      | 97  | 208 | 12         |
|     |     |            |                                         |     |                                                                                      | 12  | I   | PVX_072190 |
| 1   | 54  | 8          |                                         |     |                                                                                      |     |     |            |
| 288 | 309 | 9          |                                         |     |                                                                                      |     |     |            |
| 292 | 316 | 74         |                                         |     |                                                                                      |     |     |            |
| 288 | 310 | 9          |                                         |     |                                                                                      |     |     |            |
| 348 | 360 | 8          |                                         |     |                                                                                      |     |     |            |
| 312 | 329 | 15         |                                         |     |                                                                                      |     |     |            |
| 128 | 158 | 12         |                                         |     |                                                                                      |     |     |            |
| 289 | 310 | 9          |                                         |     |                                                                                      |     |     |            |
| 311 | 325 | 15         |                                         |     |                                                                                      |     |     |            |
| 75  | 85  | 72         |                                         |     |                                                                                      |     |     |            |
| 159 | 179 | 6          |                                         |     |                                                                                      |     |     |            |
| 180 | 214 | 6          |                                         |     |                                                                                      |     |     |            |
| 180 | 214 | 6          |                                         |     |                                                                                      |     |     |            |
| 111 | 207 | 12         |                                         |     |                                                                                      |     |     |            |
| 89  | 126 | 5          |                                         |     |                                                                                      |     |     |            |
| 115 | 207 | 12         |                                         |     |                                                                                      |     |     |            |
| 13  | I   | PVX_014625 | variable surface protein Vir7, putative | 375 |  | 327 | 346 | 6          |
|     |     |            |                                         |     |                                                                                      | 56  | 71  | 8          |
|     |     |            |                                         |     |                                                                                      | 1   | 54  | 8          |
|     |     |            |                                         |     |                                                                                      | 289 | 310 | 9          |
|     |     |            |                                         |     |                                                                                      | 293 | 319 | 74         |
|     |     |            |                                         |     |                                                                                      | 289 | 311 | 9          |
|     |     |            |                                         |     |                                                                                      | 349 | 360 | 8          |
|     |     |            |                                         |     |                                                                                      | 128 | 156 | 12         |
|     |     |            |                                         |     |                                                                                      | 290 | 311 | 9          |





|    |               |            |                                                     |     |                                                                                      |                      |                          |                      |
|----|---------------|------------|-----------------------------------------------------|-----|--------------------------------------------------------------------------------------|----------------------|--------------------------|----------------------|
| 17 | Not clustered | PVX_039690 | variable surface protein Vir27, truncated, putative | 66  |    | 19<br>35<br>56       | 55<br>48<br>64           | 15<br>6<br>8         |
| 1  | B             | PVX_086350 | variable surface protein Vir21, putative            | 397 |    | 341<br>339<br>342    | 351<br>352<br>350        | 74<br>74<br>74       |
| 2  | Not clustered | PVX_108775 | variable surface protein Vir26, truncated, putative | 62  |    | 24<br>6<br>7         | 46<br>18<br>20           | 8<br>74<br>74        |
| 3  | B             | PVX_088790 | variable surface protein Vir21-like                 | 467 |    | 127<br>353<br>296    | 181<br>376<br>309        | 7<br>17<br>72        |
|    |               |            |                                                     |     |                                                                                      | 149<br>107<br>298    | 161<br>126<br>305        | 4<br>12<br>72        |
|    |               |            |                                                     |     |                                                                                      | 60<br>296<br>64      | 75<br>310<br>74          | 72<br>72<br>72       |
| 4  | B             | PVX_096915 | variable usrface prootein Vir21-related             | 295 |  | 188<br>210<br>168    | 242<br>222<br>187        | 7<br>4<br>12         |
|    |               |            |                                                     |     |                                                                                      | 126<br>126<br>126    | 137<br>136<br>135        | 72<br>72<br>72       |
| 5  | B             | PVX_110305 | variable surface protein Vir21, putative            | 267 |  | 152<br>152<br>204    | 203<br>207<br>213        | 7<br>7<br>6          |
|    |               |            |                                                     |     |                                                                                      | 177<br>132           | 187<br>151               | 4<br>12              |
|    |               |            |                                                     |     |                                                                                      | 90<br>90<br>90<br>90 | 100<br>101<br>101<br>101 | 72<br>72<br>72<br>72 |
| 6  | B             | PVX_115480 | variable surface protein Vir21, putative            | 276 |  | 153<br>178<br>133    | 209<br>188<br>152        | 7<br>4<br>12         |
|    |               |            |                                                     |     |                                                                                      | 90<br>88<br>91       | 102<br>100<br>102        | 72<br>72<br>72       |
| 7  | B             | PVX_180275 | variable surface protein Vir26-like, truncated      | 236 |  | 201<br>27<br>155     | 213<br>66<br>172         | 6<br>7<br>12         |
|    |               |            |                                                     |     |                                                                                      | 191                  | 200                      | 6                    |



|    |   |            |                                                     |     |                                                                                      |  |                     |                     |                    |
|----|---|------------|-----------------------------------------------------|-----|--------------------------------------------------------------------------------------|--|---------------------|---------------------|--------------------|
|    |   |            |                                                     |     |                                                                                      |  | <a href="#">190</a> | <a href="#">211</a> | <a href="#">6</a>  |
|    |   |            |                                                     |     |                                                                                      |  | <a href="#">21</a>  | <a href="#">31</a>  | <a href="#">30</a> |
|    |   |            |                                                     |     |                                                                                      |  | <a href="#">85</a>  | <a href="#">98</a>  | <a href="#">5</a>  |
|    |   |            |                                                     |     |                                                                                      |  | <a href="#">102</a> | <a href="#">111</a> | <a href="#">72</a> |
|    |   |            |                                                     |     |                                                                                      |  | <a href="#">63</a>  | <a href="#">76</a>  | <a href="#">8</a>  |
|    |   |            |                                                     |     |                                                                                      |  | <a href="#">225</a> | <a href="#">279</a> | <a href="#">6</a>  |
|    |   |            |                                                     |     |                                                                                      |  | <a href="#">319</a> | <a href="#">341</a> | <a href="#">8</a>  |
|    |   |            |                                                     |     |                                                                                      |  | <a href="#">208</a> | <a href="#">219</a> | <a href="#">7</a>  |
|    |   |            |                                                     |     |                                                                                      |  | <a href="#">185</a> | <a href="#">201</a> | <a href="#">6</a>  |
|    |   |            |                                                     |     |                                                                                      |  | <a href="#">3</a>   | <a href="#">53</a>  | <a href="#">7</a>  |
|    |   |            |                                                     |     |                                                                                      |  | <a href="#">303</a> | <a href="#">315</a> | <a href="#">74</a> |
|    |   |            |                                                     |     |                                                                                      |  | <a href="#">344</a> | <a href="#">354</a> | <a href="#">7</a>  |
|    |   |            |                                                     |     |                                                                                      |  | <a href="#">281</a> | <a href="#">302</a> | <a href="#">6</a>  |
|    |   |            |                                                     |     |                                                                                      |  | <a href="#">187</a> | <a href="#">201</a> | <a href="#">6</a>  |
|    |   |            |                                                     |     |                                                                                      |  | <a href="#">96</a>  | <a href="#">107</a> | <a href="#">72</a> |
|    |   |            |                                                     |     |                                                                                      |  | <a href="#">96</a>  | <a href="#">107</a> | <a href="#">72</a> |
|    |   |            |                                                     |     |                                                                                      |  | <a href="#">64</a>  | <a href="#">72</a>  | <a href="#">8</a>  |
|    |   |            |                                                     |     |                                                                                      |  | <a href="#">169</a> | <a href="#">223</a> | <a href="#">6</a>  |
|    |   |            |                                                     |     |                                                                                      |  | <a href="#">245</a> | <a href="#">258</a> | <a href="#">74</a> |
|    |   |            |                                                     |     |                                                                                      |  | <a href="#">261</a> | <a href="#">283</a> | <a href="#">8</a>  |
|    |   |            |                                                     |     |                                                                                      |  | <a href="#">245</a> | <a href="#">257</a> | <a href="#">74</a> |
|    |   |            |                                                     |     |                                                                                      |  | <a href="#">152</a> | <a href="#">164</a> | <a href="#">7</a>  |
|    |   |            |                                                     |     |                                                                                      |  | <a href="#">129</a> | <a href="#">151</a> | <a href="#">6</a>  |
|    |   |            |                                                     |     |                                                                                      |  | <a href="#">246</a> | <a href="#">259</a> | <a href="#">74</a> |
|    |   |            |                                                     |     |                                                                                      |  | <a href="#">86</a>  | <a href="#">101</a> | <a href="#">12</a> |
|    |   |            |                                                     |     |                                                                                      |  | <a href="#">284</a> | <a href="#">297</a> | <a href="#">7</a>  |
|    |   |            |                                                     |     |                                                                                      |  | <a href="#">225</a> | <a href="#">234</a> | <a href="#">6</a>  |
|    |   |            |                                                     |     |                                                                                      |  | <a href="#">225</a> | <a href="#">245</a> | <a href="#">6</a>  |
|    |   |            |                                                     |     |                                                                                      |  | <a href="#">121</a> | <a href="#">128</a> | <a href="#">6</a>  |
|    |   |            |                                                     |     |                                                                                      |  | <a href="#">130</a> | <a href="#">151</a> | <a href="#">6</a>  |
|    |   |            |                                                     |     |                                                                                      |  | <a href="#">24</a>  | <a href="#">38</a>  | <a href="#">5</a>  |
|    |   |            |                                                     |     |                                                                                      |  | <a href="#">235</a> | <a href="#">248</a> | <a href="#">13</a> |
|    |   |            |                                                     |     |                                                                                      |  | <a href="#">41</a>  | <a href="#">51</a>  | <a href="#">72</a> |
|    |   |            |                                                     |     |                                                                                      |  | <a href="#">42</a>  | <a href="#">50</a>  | <a href="#">72</a> |
|    |   |            |                                                     |     |                                                                                      |  | <a href="#">97</a>  | <a href="#">109</a> | <a href="#">4</a>  |
|    |   |            |                                                     |     |                                                                                      |  | <a href="#">196</a> | <a href="#">248</a> | <a href="#">6</a>  |
|    |   |            |                                                     |     |                                                                                      |  | <a href="#">288</a> | <a href="#">305</a> | <a href="#">8</a>  |
|    |   |            |                                                     |     |                                                                                      |  | <a href="#">271</a> | <a href="#">288</a> | <a href="#">74</a> |
|    |   |            |                                                     |     |                                                                                      |  | <a href="#">178</a> | <a href="#">191</a> | <a href="#">7</a>  |
|    |   |            |                                                     |     |                                                                                      |  | <a href="#">272</a> | <a href="#">284</a> | <a href="#">74</a> |
|    |   |            |                                                     |     |                                                                                      |  | <a href="#">120</a> | <a href="#">137</a> | <a href="#">12</a> |
|    |   |            |                                                     |     |                                                                                      |  | <a href="#">311</a> | <a href="#">322</a> | <a href="#">7</a>  |
|    |   |            |                                                     |     |                                                                                      |  | <a href="#">250</a> | <a href="#">271</a> | <a href="#">6</a>  |
|    |   |            |                                                     |     |                                                                                      |  | <a href="#">79</a>  | <a href="#">87</a>  | <a href="#">72</a> |
|    |   |            |                                                     |     |                                                                                      |  | <a href="#">39</a>  | <a href="#">52</a>  | <a href="#">8</a>  |
| 11 | B | PVX_033190 | variable surface protein Vir21, putative            | 357 | 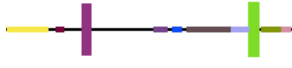   |  |                     |                     |                    |
| 12 | B | PVX_058690 | variable surface protein Vir21, truncated, putative | 299 |  |  |                     |                     |                    |
| 13 | B | PVX_062190 | variable surface protein Vir21, truncated, putative | 326 |  |  |                     |                     |                    |

|                     |                     |                    |                                                      |                     |                    |                     |                     |                    |
|---------------------|---------------------|--------------------|------------------------------------------------------|---------------------|--------------------|---------------------|---------------------|--------------------|
| 14                  | B                   | PVX_164265         | variable surface protein Vir21, putative             | 362                 |                    | <a href="#">117</a> | <a href="#">129</a> | <a href="#">4</a>  |
|                     |                     |                    |                                                      |                     |                    | <a href="#">225</a> | <a href="#">279</a> | <a href="#">6</a>  |
|                     |                     |                    |                                                      |                     |                    | <a href="#">326</a> | <a href="#">346</a> | <a href="#">8</a>  |
|                     |                     |                    |                                                      |                     |                    | <a href="#">208</a> | <a href="#">219</a> | <a href="#">7</a>  |
|                     |                     |                    |                                                      |                     |                    | <a href="#">4</a>   | <a href="#">58</a>  | <a href="#">7</a>  |
|                     |                     |                    |                                                      |                     |                    | <a href="#">140</a> | <a href="#">157</a> | <a href="#">12</a> |
|                     |                     |                    |                                                      |                     |                    | <a href="#">348</a> | <a href="#">359</a> | <a href="#">7</a>  |
|                     |                     |                    |                                                      |                     |                    | <a href="#">176</a> | <a href="#">184</a> | <a href="#">6</a>  |
|                     |                     |                    |                                                      |                     |                    | <a href="#">96</a>  | <a href="#">107</a> | <a href="#">72</a> |
|                     |                     |                    |                                                      |                     |                    | <a href="#">287</a> | <a href="#">313</a> | <a href="#">13</a> |
|                     |                     |                    | <a href="#">96</a>                                   | <a href="#">107</a> | <a href="#">72</a> |                     |                     |                    |
|                     |                     |                    | <a href="#">96</a>                                   | <a href="#">108</a> | <a href="#">72</a> |                     |                     |                    |
|                     |                     |                    | <a href="#">61</a>                                   | <a href="#">69</a>  | <a href="#">8</a>  |                     |                     |                    |
| 15                  | Not clustered       | PVX_059690         | variable surface protein Vir26, putative             | 88                  |                    | <a href="#">1</a>   | <a href="#">62</a>  | <a href="#">7</a>  |
|                     |                     |                    |                                                      |                     |                    | <a href="#">21</a>  | <a href="#">31</a>  | <a href="#">30</a> |
|                     |                     |                    |                                                      |                     |                    | <a href="#">65</a>  | <a href="#">75</a>  | <a href="#">8</a>  |
| 1                   | K                   | PVX_053690         | variable surface protein Vir30, putative             | 309                 |                    | <a href="#">10</a>  | <a href="#">26</a>  | <a href="#">5</a>  |
|                     |                     |                    |                                                      |                     |                    | <a href="#">271</a> | <a href="#">309</a> | <a href="#">4</a>  |
|                     |                     |                    |                                                      |                     |                    | <a href="#">278</a> | <a href="#">306</a> | <a href="#">4</a>  |
|                     |                     |                    |                                                      |                     |                    | <a href="#">130</a> | <a href="#">208</a> | <a href="#">40</a> |
|                     |                     |                    |                                                      |                     |                    | <a href="#">37</a>  | <a href="#">68</a>  | <a href="#">6</a>  |
|                     |                     |                    |                                                      |                     |                    | <a href="#">189</a> | <a href="#">210</a> | <a href="#">17</a> |
|                     |                     |                    |                                                      |                     |                    | <a href="#">253</a> | <a href="#">265</a> | <a href="#">74</a> |
| <a href="#">252</a> | <a href="#">264</a> | <a href="#">74</a> |                                                      |                     |                    |                     |                     |                    |
|                     |                     |                    | <a href="#">195</a>                                  | <a href="#">207</a> | <a href="#">17</a> |                     |                     |                    |
| 2                   | K                   | PVX_042690         | variable surface protein Vir30, putative             | 337                 |                    | <a href="#">36</a>  | <a href="#">54</a>  | <a href="#">5</a>  |
|                     |                     |                    |                                                      |                     |                    | <a href="#">299</a> | <a href="#">337</a> | <a href="#">4</a>  |
|                     |                     |                    |                                                      |                     |                    | <a href="#">305</a> | <a href="#">334</a> | <a href="#">4</a>  |
|                     |                     |                    |                                                      |                     |                    | <a href="#">155</a> | <a href="#">237</a> | <a href="#">40</a> |
|                     |                     |                    |                                                      |                     |                    | <a href="#">63</a>  | <a href="#">90</a>  | <a href="#">6</a>  |
|                     |                     |                    |                                                      |                     |                    | <a href="#">218</a> | <a href="#">238</a> | <a href="#">17</a> |
|                     |                     |                    |                                                      |                     |                    | <a href="#">111</a> | <a href="#">127</a> | <a href="#">72</a> |
|                     |                     |                    |                                                      |                     |                    | <a href="#">281</a> | <a href="#">295</a> | <a href="#">74</a> |
|                     |                     |                    |                                                      |                     |                    | <a href="#">183</a> | <a href="#">214</a> | <a href="#">5</a>  |
|                     |                     |                    |                                                      |                     |                    | <a href="#">280</a> | <a href="#">292</a> | <a href="#">74</a> |
| 3                   | Unavailable         | PVX_163265         | variable surface protein Vir30, pseudogene, putative | 345                 |                    | <a href="#">1</a>   | <a href="#">19</a>  | <a href="#">5</a>  |
|                     |                     |                    |                                                      |                     |                    | <a href="#">307</a> | <a href="#">345</a> | <a href="#">4</a>  |
|                     |                     |                    |                                                      |                     |                    | <a href="#">314</a> | <a href="#">342</a> | <a href="#">4</a>  |
|                     |                     |                    |                                                      |                     |                    | <a href="#">78</a>  | <a href="#">88</a>  | <a href="#">72</a> |
|                     |                     |                    |                                                      |                     |                    | <a href="#">28</a>  | <a href="#">59</a>  | <a href="#">6</a>  |
|                     |                     |                    |                                                      |                     |                    | <a href="#">185</a> | <a href="#">207</a> | <a href="#">17</a> |
|                     |                     |                    |                                                      |                     |                    | <a href="#">78</a>  | <a href="#">89</a>  | <a href="#">72</a> |
|                     |                     |                    | <a href="#">126</a>                                  | <a href="#">146</a> | <a href="#">40</a> |                     |                     |                    |
|                     |                     |                    | <a href="#">150</a>                                  | <a href="#">181</a> | <a href="#">5</a>  |                     |                     |                    |
| 4                   | K                   | PVX_145260         | variable surface                                     | 305                 |                    | <a href="#">267</a> | <a href="#">305</a> | <a href="#">4</a>  |

|    |               |            |                                                                                                            |     |                                                                                      |  |                     |                     |                    |
|----|---------------|------------|------------------------------------------------------------------------------------------------------------|-----|--------------------------------------------------------------------------------------|--|---------------------|---------------------|--------------------|
|    |               |            |                                                                                                            |     |                                                                                      |  | <a href="#">273</a> | <a href="#">302</a> | <a href="#">4</a>  |
|    |               |            |                                                                                                            |     |                                                                                      |  | <a href="#">38</a>  | <a href="#">67</a>  | <a href="#">6</a>  |
|    |               |            |                                                                                                            |     |                                                                                      |  | <a href="#">186</a> | <a href="#">207</a> | <a href="#">17</a> |
|    |               |            |                                                                                                            |     |                                                                                      |  | <a href="#">84</a>  | <a href="#">99</a>  | <a href="#">72</a> |
|    |               |            |                                                                                                            |     |                                                                                      |  | <a href="#">138</a> | <a href="#">152</a> | <a href="#">40</a> |
|    |               |            |                                                                                                            |     |                                                                                      |  | <a href="#">153</a> | <a href="#">185</a> | <a href="#">5</a>  |
| 5  | K             | PVX_031690 | variable surface protein Vir30, putative                                                                   | 268 |    |  | <a href="#">14</a>  | <a href="#">24</a>  | <a href="#">5</a>  |
|    |               |            |                                                                                                            |     |                                                                                      |  | <a href="#">134</a> | <a href="#">215</a> | <a href="#">40</a> |
|    |               |            |                                                                                                            |     |                                                                                      |  | <a href="#">40</a>  | <a href="#">71</a>  | <a href="#">6</a>  |
|    |               |            |                                                                                                            |     |                                                                                      |  | <a href="#">192</a> | <a href="#">214</a> | <a href="#">17</a> |
|    |               |            |                                                                                                            |     |                                                                                      |  | <a href="#">89</a>  | <a href="#">105</a> | <a href="#">72</a> |
|    |               |            |                                                                                                            |     |                                                                                      |  | <a href="#">137</a> | <a href="#">158</a> | <a href="#">40</a> |
|    |               |            |                                                                                                            |     |                                                                                      |  | <a href="#">159</a> | <a href="#">191</a> | <a href="#">5</a>  |
| 6  | K             | PVX_056690 | variable surface protein Vir30, truncated, putative                                                        | 190 |    |  | <a href="#">3</a>   | <a href="#">19</a>  | <a href="#">5</a>  |
|    |               |            |                                                                                                            |     |                                                                                      |  | <a href="#">123</a> | <a href="#">187</a> | <a href="#">40</a> |
|    |               |            |                                                                                                            |     |                                                                                      |  | <a href="#">30</a>  | <a href="#">59</a>  | <a href="#">6</a>  |
|    |               |            |                                                                                                            |     |                                                                                      |  | <a href="#">80</a>  | <a href="#">95</a>  | <a href="#">72</a> |
|    |               |            |                                                                                                            |     |                                                                                      |  | <a href="#">159</a> | <a href="#">181</a> | <a href="#">5</a>  |
| 7  | Not clustered | PVX_021685 | variable surface protein Vir5, putative                                                                    | 426 |   |  | <a href="#">117</a> | <a href="#">218</a> | <a href="#">40</a> |
|    |               |            |                                                                                                            |     |                                                                                      |  | <a href="#">85</a>  | <a href="#">95</a>  | <a href="#">72</a> |
|    |               |            |                                                                                                            |     |                                                                                      |  | <a href="#">275</a> | <a href="#">305</a> | <a href="#">4</a>  |
|    |               |            |                                                                                                            |     |                                                                                      |  | <a href="#">332</a> | <a href="#">369</a> | <a href="#">4</a>  |
| 8  | Not clustered | PVX_093715 | variable surface protein Vir5-like                                                                         | 499 |  |  | <a href="#">144</a> | <a href="#">256</a> | <a href="#">40</a> |
|    |               |            |                                                                                                            |     |                                                                                      |  | <a href="#">338</a> | <a href="#">366</a> | <a href="#">4</a>  |
|    |               |            |                                                                                                            |     |                                                                                      |  | <a href="#">395</a> | <a href="#">443</a> | <a href="#">4</a>  |
| 9  | Unavailable   | PVX_156260 | variable surface protein Vir5, pseudogene, putative; truncated due to end of contig at 3'. 5' interrupted. | 213 |  |  | <a href="#">14</a>  | <a href="#">44</a>  | <a href="#">4</a>  |
|    |               |            |                                                                                                            |     |                                                                                      |  | <a href="#">71</a>  | <a href="#">108</a> | <a href="#">4</a>  |
| 10 | Not clustered | PVX_101570 | variable surface protein Vir5-related                                                                      | 386 |  |  | <a href="#">51</a>  | <a href="#">59</a>  | <a href="#">72</a> |
|    |               |            |                                                                                                            |     |                                                                                      |  | <a href="#">81</a>  | <a href="#">182</a> | <a href="#">40</a> |
|    |               |            |                                                                                                            |     |                                                                                      |  | <a href="#">239</a> | <a href="#">267</a> | <a href="#">4</a>  |
|    |               |            |                                                                                                            |     |                                                                                      |  | <a href="#">50</a>  | <a href="#">59</a>  | <a href="#">72</a> |
|    |               |            |                                                                                                            |     |                                                                                      |  | <a href="#">296</a> | <a href="#">344</a> | <a href="#">4</a>  |
|    |               |            |                                                                                                            |     |                                                                                      |  | <a href="#">150</a> | <a href="#">162</a> | <a href="#">17</a> |
| 11 | Not clustered | PVX_009600 | variable surface protein Vir5-related                                                                      | 259 |  |  | <a href="#">115</a> | <a href="#">214</a> | <a href="#">40</a> |
|    |               |            |                                                                                                            |     |                                                                                      |  | <a href="#">82</a>  | <a href="#">92</a>  | <a href="#">72</a> |
| 12 |               | PVX_005565 | hypothetical protein                                                                                       | 209 |  |  | <a href="#">103</a> | <a href="#">194</a> | <a href="#">40</a> |
|    |               |            |                                                                                                            |     |                                                                                      |  | <a href="#">70</a>  | <a href="#">79</a>  | <a href="#">72</a> |
|    |               |            |                                                                                                            |     |                                                                                      |  | <a href="#">70</a>  | <a href="#">79</a>  | <a href="#">72</a> |
| 13 |               | PVX_086885 | hypothetical protein                                                                                       | 266 |  |  | <a href="#">159</a> | <a href="#">247</a> | <a href="#">7</a>  |
|    |               |            |                                                                                                            |     |                                                                                      |  | <a href="#">87</a>  | <a href="#">192</a> | <a href="#">40</a> |
|    |               |            |                                                                                                            |     |                                                                                      |  | <a href="#">56</a>  | <a href="#">66</a>  | <a href="#">72</a> |



|   |   |            |                                                     |     |                                                                                      |  |                     |                     |                    |
|---|---|------------|-----------------------------------------------------|-----|--------------------------------------------------------------------------------------|--|---------------------|---------------------|--------------------|
|   |   |            |                                                     |     |                                                                                      |  | <a href="#">110</a> | <a href="#">126</a> | <a href="#">7</a>  |
|   |   |            |                                                     |     |                                                                                      |  | <a href="#">83</a>  | <a href="#">100</a> | <a href="#">72</a> |
|   |   |            |                                                     |     |                                                                                      |  | <a href="#">89</a>  | <a href="#">98</a>  | <a href="#">72</a> |
|   |   |            |                                                     |     |                                                                                      |  | <a href="#">89</a>  | <a href="#">96</a>  | <a href="#">72</a> |
|   |   |            |                                                     |     |                                                                                      |  | <a href="#">89</a>  | <a href="#">98</a>  | <a href="#">72</a> |
|   |   |            |                                                     |     |                                                                                      |  | <a href="#">192</a> | <a href="#">221</a> | <a href="#">13</a> |
|   |   |            |                                                     |     |                                                                                      |  | <a href="#">343</a> | <a href="#">366</a> | <a href="#">6</a>  |
|   |   |            |                                                     |     |                                                                                      |  | <a href="#">368</a> | <a href="#">381</a> | <a href="#">8</a>  |
|   |   |            |                                                     |     |                                                                                      |  | <a href="#">343</a> | <a href="#">367</a> | <a href="#">6</a>  |
|   |   |            |                                                     |     |                                                                                      |  | <a href="#">343</a> | <a href="#">366</a> | <a href="#">6</a>  |
|   |   |            |                                                     |     |                                                                                      |  | <a href="#">330</a> | <a href="#">342</a> | <a href="#">9</a>  |
|   |   |            |                                                     |     |                                                                                      |  | <a href="#">328</a> | <a href="#">342</a> | <a href="#">9</a>  |
|   |   |            |                                                     |     |                                                                                      |  | <a href="#">3</a>   | <a href="#">57</a>  | <a href="#">6</a>  |
|   |   |            |                                                     |     |                                                                                      |  | <a href="#">162</a> | <a href="#">182</a> | <a href="#">8</a>  |
|   |   |            |                                                     |     |                                                                                      |  | <a href="#">302</a> | <a href="#">329</a> | <a href="#">9</a>  |
|   |   |            |                                                     |     |                                                                                      |  | <a href="#">116</a> | <a href="#">148</a> | <a href="#">11</a> |
|   |   |            |                                                     |     |                                                                                      |  | <a href="#">3</a>   | <a href="#">58</a>  | <a href="#">6</a>  |
|   |   |            |                                                     |     |                                                                                      |  | <a href="#">62</a>  | <a href="#">83</a>  | <a href="#">72</a> |
|   |   |            |                                                     |     |                                                                                      |  | <a href="#">343</a> | <a href="#">367</a> | <a href="#">6</a>  |
|   |   |            |                                                     |     |                                                                                      |  | <a href="#">3</a>   | <a href="#">58</a>  | <a href="#">6</a>  |
|   |   |            |                                                     |     |                                                                                      |  | <a href="#">69</a>  | <a href="#">78</a>  | <a href="#">72</a> |
|   |   |            |                                                     |     |                                                                                      |  | <a href="#">170</a> | <a href="#">200</a> | <a href="#">13</a> |
|   |   |            |                                                     |     |                                                                                      |  | <a href="#">322</a> | <a href="#">345</a> | <a href="#">6</a>  |
|   |   |            |                                                     |     |                                                                                      |  | <a href="#">347</a> | <a href="#">360</a> | <a href="#">8</a>  |
|   |   |            |                                                     |     |                                                                                      |  | <a href="#">322</a> | <a href="#">346</a> | <a href="#">6</a>  |
|   |   |            |                                                     |     |                                                                                      |  | <a href="#">322</a> | <a href="#">345</a> | <a href="#">6</a>  |
|   |   |            |                                                     |     |                                                                                      |  | <a href="#">309</a> | <a href="#">321</a> | <a href="#">9</a>  |
|   |   |            |                                                     |     |                                                                                      |  | <a href="#">307</a> | <a href="#">321</a> | <a href="#">9</a>  |
|   |   |            |                                                     |     |                                                                                      |  | <a href="#">1</a>   | <a href="#">45</a>  | <a href="#">6</a>  |
|   |   |            |                                                     |     |                                                                                      |  | <a href="#">140</a> | <a href="#">160</a> | <a href="#">8</a>  |
|   |   |            |                                                     |     |                                                                                      |  | <a href="#">281</a> | <a href="#">308</a> | <a href="#">9</a>  |
|   |   |            |                                                     |     |                                                                                      |  | <a href="#">112</a> | <a href="#">126</a> | <a href="#">11</a> |
|   |   |            |                                                     |     |                                                                                      |  | <a href="#">1</a>   | <a href="#">49</a>  | <a href="#">6</a>  |
|   |   |            |                                                     |     |                                                                                      |  | <a href="#">85</a>  | <a href="#">95</a>  | <a href="#">7</a>  |
|   |   |            |                                                     |     |                                                                                      |  | <a href="#">54</a>  | <a href="#">73</a>  | <a href="#">72</a> |
|   |   |            |                                                     |     |                                                                                      |  | <a href="#">322</a> | <a href="#">346</a> | <a href="#">6</a>  |
|   |   |            |                                                     |     |                                                                                      |  | <a href="#">1</a>   | <a href="#">48</a>  | <a href="#">6</a>  |
|   |   |            |                                                     |     |                                                                                      |  | <a href="#">59</a>  | <a href="#">68</a>  | <a href="#">72</a> |
|   |   |            |                                                     |     |                                                                                      |  | <a href="#">193</a> | <a href="#">227</a> | <a href="#">13</a> |
|   |   |            |                                                     |     |                                                                                      |  | <a href="#">345</a> | <a href="#">368</a> | <a href="#">6</a>  |
|   |   |            |                                                     |     |                                                                                      |  | <a href="#">370</a> | <a href="#">383</a> | <a href="#">8</a>  |
|   |   |            |                                                     |     |                                                                                      |  | <a href="#">345</a> | <a href="#">369</a> | <a href="#">6</a>  |
|   |   |            |                                                     |     |                                                                                      |  | <a href="#">345</a> | <a href="#">368</a> | <a href="#">6</a>  |
|   |   |            |                                                     |     |                                                                                      |  | <a href="#">333</a> | <a href="#">344</a> | <a href="#">9</a>  |
|   |   |            |                                                     |     |                                                                                      |  | <a href="#">330</a> | <a href="#">344</a> | <a href="#">9</a>  |
| 6 | A | PVX_015135 | variable surface protein Vir17, truncated, putative | 383 |    |  |                     |                     |                    |
| 7 | A | PVX_011610 | variable surface protein Vir17, putative            | 362 |  |  |                     |                     |                    |
| 8 | A | PVX_141260 | variable surface protein Vir17, putative            | 385 |  |  |                     |                     |                    |





|    |               |            |                                                      |      |  |                     |                     |                    |
|----|---------------|------------|------------------------------------------------------|------|--|---------------------|---------------------|--------------------|
|    |               |            | pseudogene,<br>putative                              |      |  | <a href="#">342</a> | <a href="#">367</a> | <a href="#">9</a>  |
|    |               |            |                                                      |      |  | <a href="#">171</a> | <a href="#">194</a> | <a href="#">11</a> |
|    |               |            |                                                      |      |  | <a href="#">51</a>  | <a href="#">107</a> | <a href="#">6</a>  |
|    |               |            |                                                      |      |  | <a href="#">110</a> | <a href="#">132</a> | <a href="#">72</a> |
|    |               |            |                                                      |      |  | <a href="#">51</a>  | <a href="#">105</a> | <a href="#">6</a>  |
|    |               |            |                                                      |      |  | <a href="#">117</a> | <a href="#">126</a> | <a href="#">72</a> |
| 12 | Not clustered | PVX_153260 | variable surface protein Vir17, truncated, putative  | 67   |  | <a href="#">27</a>  | <a href="#">50</a>  | <a href="#">6</a>  |
|    |               |            |                                                      |      |  | <a href="#">52</a>  | <a href="#">65</a>  | <a href="#">8</a>  |
|    |               |            |                                                      |      |  | <a href="#">27</a>  | <a href="#">51</a>  | <a href="#">6</a>  |
|    |               |            |                                                      |      |  | <a href="#">27</a>  | <a href="#">50</a>  | <a href="#">6</a>  |
|    |               |            |                                                      |      |  | <a href="#">12</a>  | <a href="#">26</a>  | <a href="#">9</a>  |
|    |               |            |                                                      |      |  | <a href="#">27</a>  | <a href="#">51</a>  | <a href="#">6</a>  |
| 13 | Unavailable   | PVX_171270 | variable surface protein Vir17, pseudogene, putative | 253  |  | <a href="#">19</a>  | <a href="#">56</a>  | <a href="#">13</a> |
|    |               |            |                                                      |      |  | <a href="#">199</a> | <a href="#">213</a> | <a href="#">9</a>  |
|    |               |            |                                                      |      |  | <a href="#">136</a> | <a href="#">150</a> | <a href="#">9</a>  |
|    |               |            |                                                      |      |  | <a href="#">152</a> | <a href="#">161</a> | <a href="#">9</a>  |
| 14 | Not clustered | PVX_144260 | variable surface protein Vir17, putative, pseudogene | 430  |  | <a href="#">314</a> | <a href="#">339</a> | <a href="#">9</a>  |
| 15 | A             | PVX_112645 | variable surface protein Vir17-like                  | 321  |  | <a href="#">208</a> | <a href="#">227</a> | <a href="#">13</a> |
| 1  | Not clustered | PVX_096980 | variable surface protein Vir, putative               | 396  |  | <a href="#">163</a> | <a href="#">179</a> | <a href="#">4</a>  |
|    |               |            |                                                      |      |  | <a href="#">281</a> | <a href="#">295</a> | <a href="#">74</a> |
|    |               |            |                                                      |      |  | <a href="#">284</a> | <a href="#">291</a> | <a href="#">74</a> |
| 2  | Not clustered | PVX_096970 | variable surface protein Vir8-related                | 491  |  | <a href="#">166</a> | <a href="#">184</a> | <a href="#">4</a>  |
|    |               |            |                                                      |      |  | <a href="#">285</a> | <a href="#">304</a> | <a href="#">74</a> |
|    |               |            |                                                      |      |  | <a href="#">287</a> | <a href="#">296</a> | <a href="#">74</a> |
| 3  | Not clustered | PVX_176270 | variable surface protein Vir8                        | 339  |  | <a href="#">60</a>  | <a href="#">70</a>  | <a href="#">28</a> |
|    |               |            |                                                      |      |  | <a href="#">281</a> | <a href="#">300</a> | <a href="#">74</a> |
|    |               |            |                                                      |      |  | <a href="#">279</a> | <a href="#">287</a> | <a href="#">74</a> |
| 4  |               | PVX_096975 | hypothetical protein                                 | 556  |  | <a href="#">172</a> | <a href="#">183</a> | <a href="#">4</a>  |
|    |               |            |                                                      |      |  | <a href="#">281</a> | <a href="#">302</a> | <a href="#">74</a> |
| 5  |               | PVX_096965 | hypothetical protein                                 | 285  |  | <a href="#">119</a> | <a href="#">136</a> | <a href="#">4</a>  |
| 6  | Not clustered | PVX_096985 | variable surface protein Vir, putative               | 387  |  | <a href="#">260</a> | <a href="#">276</a> | <a href="#">74</a> |
|    |               |            |                                                      |      |  | <a href="#">146</a> | <a href="#">165</a> | <a href="#">4</a>  |
|    |               |            |                                                      |      |  | <a href="#">268</a> | <a href="#">292</a> | <a href="#">74</a> |
|    |               |            |                                                      |      |  | <a href="#">268</a> | <a href="#">284</a> | <a href="#">74</a> |
| 7  | Not clustered | PVX_120840 | variable surface protein Vir8-related                | 324  |  | <a href="#">163</a> | <a href="#">174</a> | <a href="#">4</a>  |
|    |               |            |                                                      |      |  | <a href="#">145</a> | <a href="#">208</a> | <a href="#">40</a> |
|    |               |            |                                                      |      |  | <a href="#">50</a>  | <a href="#">59</a>  | <a href="#">28</a> |
| 8  |               | PVX_123205 | CAF1 ribonuclease domain containing protein          | 2024 |  |                     |                     |                    |

|     |               |            |                                                     |      |                                                                                      |     |     |    |  |
|-----|---------------|------------|-----------------------------------------------------|------|--------------------------------------------------------------------------------------|-----|-----|----|--|
| 9   |               | PVX_092630 | hypothetical protein, conserved                     | 2712 |                                                                                      |     |     |    |  |
| 10  |               | PVX_119620 | hypothetical protein, conserved                     | 1384 |                                                                                      |     |     |    |  |
| 11  |               | PVX_183275 | hypothetical protein                                | 391  |                                                                                      |     |     |    |  |
| 12  | Not clustered | PVX_086890 | variable surface protein Vir8-like                  | 271  |                                                                                      |     |     |    |  |
| 1   | Not clustered | PVX_173270 | variable surface protein Vir23, putative            | 346  |    | 336 | 345 | 5  |  |
|     |               |            |                                                     |      |                                                                                      | 70  | 87  | 4  |  |
|     |               |            |                                                     |      |                                                                                      | 146 | 172 | 17 |  |
|     |               |            |                                                     |      |                                                                                      | 31  | 67  | 4  |  |
|     |               |            |                                                     |      |                                                                                      | 207 | 238 | 5  |  |
|     |               |            |                                                     |      |                                                                                      | 258 | 290 | 6  |  |
|     |               |            |                                                     |      |                                                                                      | 275 | 290 | 6  |  |
|     |               |            |                                                     |      |                                                                                      | 275 | 293 | 6  |  |
|     |               |            |                                                     |      |                                                                                      | 113 | 145 | 7  |  |
|     |               |            |                                                     |      |                                                                                      | 113 | 147 | 7  |  |
|     |               |            |                                                     |      |                                                                                      | 178 | 206 | 10 |  |
|     |               |            |                                                     |      |                                                                                      | 291 | 301 | 74 |  |
|     |               |            |                                                     |      |                                                                                      | 302 | 334 | 5  |  |
|     |               |            |                                                     |      |                                                                                      | 181 | 199 | 10 |  |
| 96  | 104           | 72         |                                                     |      |                                                                                      |     |     |    |  |
| 2   | Not clustered | PVX_011615 | variable surface protein vir23, putative            | 351  |  | 341 | 351 | 5  |  |
|     |               |            |                                                     |      |                                                                                      | 75  | 91  | 4  |  |
|     |               |            |                                                     |      |                                                                                      | 152 | 178 | 17 |  |
|     |               |            |                                                     |      |                                                                                      | 40  | 72  | 4  |  |
|     |               |            |                                                     |      |                                                                                      | 212 | 244 | 5  |  |
|     |               |            |                                                     |      |                                                                                      | 263 | 295 | 6  |  |
|     |               |            |                                                     |      |                                                                                      | 280 | 295 | 6  |  |
|     |               |            |                                                     |      |                                                                                      | 280 | 298 | 6  |  |
|     |               |            |                                                     |      |                                                                                      | 117 | 151 | 7  |  |
|     |               |            |                                                     |      |                                                                                      | 117 | 152 | 7  |  |
|     |               |            |                                                     |      |                                                                                      | 183 | 211 | 10 |  |
|     |               |            |                                                     |      |                                                                                      | 296 | 306 | 74 |  |
|     |               |            |                                                     |      |                                                                                      | 307 | 339 | 5  |  |
|     |               |            |                                                     |      |                                                                                      | 186 | 204 | 10 |  |
| 96  | 112           | 72         |                                                     |      |                                                                                      |     |     |    |  |
| 101 | 113           | 72         |                                                     |      |                                                                                      |     |     |    |  |
| 3   | Not clustered | PVX_051190 | variable surface protein Vir23, truncated, putative | 286  |  | 276 | 286 | 5  |  |
|     |               |            |                                                     |      |                                                                                      | 36  | 53  | 4  |  |
|     |               |            |                                                     |      |                                                                                      | 116 | 139 | 17 |  |
|     |               |            |                                                     |      |                                                                                      | 1   | 33  | 4  |  |
|     |               |            |                                                     |      |                                                                                      | 173 | 205 | 5  |  |
|     |               |            |                                                     |      |                                                                                      | 206 | 230 | 6  |  |
| 205 | 230           | 6          |                                                     |      |                                                                                      |     |     |    |  |

|   |               |            |                                                      |     |  |                     |                     |                     |                    |
|---|---------------|------------|------------------------------------------------------|-----|--|---------------------|---------------------|---------------------|--------------------|
|   |               |            |                                                      |     |  |                     | <a href="#">215</a> | <a href="#">233</a> | <a href="#">6</a>  |
|   |               |            |                                                      |     |  |                     | <a href="#">35</a>  | <a href="#">78</a>  | <a href="#">72</a> |
|   |               |            |                                                      |     |  |                     | <a href="#">78</a>  | <a href="#">113</a> | <a href="#">7</a>  |
|   |               |            |                                                      |     |  |                     | <a href="#">144</a> | <a href="#">172</a> | <a href="#">10</a> |
|   |               |            |                                                      |     |  |                     | <a href="#">242</a> | <a href="#">274</a> | <a href="#">5</a>  |
|   |               |            |                                                      |     |  |                     | <a href="#">147</a> | <a href="#">165</a> | <a href="#">10</a> |
|   |               |            |                                                      |     |  |                     | <a href="#">57</a>  | <a href="#">73</a>  | <a href="#">72</a> |
|   |               |            |                                                      |     |  |                     | <a href="#">62</a>  | <a href="#">74</a>  | <a href="#">72</a> |
| 4 | Unavailable   | PVX_103675 | variable surface protein Vir23, pseudogene, putative | 462 |  | <a href="#">452</a> | <a href="#">461</a> | <a href="#">5</a>   |                    |
|   |               |            |                                                      |     |  | <a href="#">154</a> | <a href="#">169</a> | <a href="#">4</a>   |                    |
|   |               |            |                                                      |     |  | <a href="#">129</a> | <a href="#">149</a> | <a href="#">4</a>   |                    |
|   |               |            |                                                      |     |  | <a href="#">340</a> | <a href="#">372</a> | <a href="#">6</a>   |                    |
|   |               |            |                                                      |     |  | <a href="#">357</a> | <a href="#">375</a> | <a href="#">6</a>   |                    |
|   |               |            |                                                      |     |  | <a href="#">194</a> | <a href="#">229</a> | <a href="#">7</a>   |                    |
|   |               |            |                                                      |     |  | <a href="#">260</a> | <a href="#">281</a> | <a href="#">10</a>  |                    |
|   |               |            |                                                      |     |  | <a href="#">418</a> | <a href="#">450</a> | <a href="#">5</a>   |                    |
|   |               |            |                                                      |     |  | <a href="#">263</a> | <a href="#">274</a> | <a href="#">10</a>  |                    |
|   |               |            |                                                      |     |  | <a href="#">315</a> | <a href="#">323</a> | <a href="#">5</a>   |                    |
| 5 | Not clustered | PVX_069690 | variable surface protein Vir23, putative             | 327 |  | <a href="#">208</a> | <a href="#">239</a> | <a href="#">5</a>   |                    |
|   |               |            |                                                      |     |  | <a href="#">258</a> | <a href="#">272</a> | <a href="#">6</a>   |                    |
|   |               |            |                                                      |     |  | <a href="#">120</a> | <a href="#">147</a> | <a href="#">7</a>   |                    |
|   |               |            |                                                      |     |  | <a href="#">178</a> | <a href="#">206</a> | <a href="#">10</a>  |                    |
|   |               |            |                                                      |     |  | <a href="#">281</a> | <a href="#">313</a> | <a href="#">5</a>   |                    |
|   |               |            |                                                      |     |  | <a href="#">181</a> | <a href="#">199</a> | <a href="#">10</a>  |                    |
| 6 | Unavailable   | PVX_005047 | variable surface protein Vir22/23-related            | 527 |  | <a href="#">458</a> | <a href="#">478</a> | <a href="#">5</a>   |                    |
|   |               |            |                                                      |     |  | <a href="#">144</a> | <a href="#">167</a> | <a href="#">17</a>  |                    |
|   |               |            |                                                      |     |  | <a href="#">391</a> | <a href="#">425</a> | <a href="#">17</a>  |                    |
|   |               |            |                                                      |     |  | <a href="#">174</a> | <a href="#">186</a> | <a href="#">10</a>  |                    |
|   |               |            |                                                      |     |  | <a href="#">90</a>  | <a href="#">100</a> | <a href="#">72</a>  |                    |
| 7 | Not clustered | PVX_086880 | variable surface protein Vir23-like                  | 268 |  | <a href="#">129</a> | <a href="#">164</a> | <a href="#">17</a>  |                    |
|   |               |            |                                                      |     |  | <a href="#">173</a> | <a href="#">186</a> | <a href="#">10</a>  |                    |
|   |               |            |                                                      |     |  | <a href="#">172</a> | <a href="#">186</a> | <a href="#">40</a>  |                    |
| 8 | Not clustered | PVX_096940 | variable surface protein Vir24-related               | 292 |  | <a href="#">87</a>  | <a href="#">94</a>  | <a href="#">72</a>  |                    |
|   |               |            |                                                      |     |  | <a href="#">89</a>  | <a href="#">99</a>  | <a href="#">72</a>  |                    |
|   |               |            |                                                      |     |  | <a href="#">257</a> | <a href="#">284</a> | <a href="#">13</a>  |                    |
|   |               |            |                                                      |     |  | <a href="#">89</a>  | <a href="#">101</a> | <a href="#">72</a>  |                    |
| 9 | Not clustered | PVX_093725 | variable surface protein Vir24-related               | 392 |  | <a href="#">90</a>  | <a href="#">99</a>  | <a href="#">72</a>  |                    |
|   |               |            |                                                      |     |  | <a href="#">332</a> | <a href="#">344</a> | <a href="#">74</a>  |                    |
|   |               |            |                                                      |     |  | <a href="#">90</a>  | <a href="#">105</a> | <a href="#">72</a>  |                    |
|   |               |            |                                                      |     |  | <a href="#">330</a> | <a href="#">344</a> | <a href="#">74</a>  |                    |
|   |               |            |                                                      |     |  | <a href="#">334</a> | <a href="#">343</a> | <a href="#">74</a>  |                    |
|   |               |            |                                                      |     |  | <a href="#">92</a>  | <a href="#">101</a> | <a href="#">72</a>  |                    |
|   |               |            |                                                      |     |  | <a href="#">333</a> | <a href="#">351</a> | <a href="#">74</a>  |                    |
|   |               |            |                                                      |     |  | <a href="#">90</a>  | <a href="#">98</a>  | <a href="#">72</a>  |                    |
|   |               |            |                                                      |     |  | <a href="#">90</a>  | <a href="#">102</a> | <a href="#">72</a>  |                    |

|    |               |            |                                                     |     |                                                                                      |     |     |    |    |
|----|---------------|------------|-----------------------------------------------------|-----|--------------------------------------------------------------------------------------|-----|-----|----|----|
| 1  | Not clustered | PVX_131260 | variable surface protein Vir12, truncated, putative | 278 | 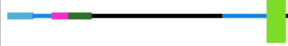   | 90  | 104 | 72 |    |
|    |               |            |                                                     |     |                                                                                      | 255 | 272 | 74 |    |
|    |               |            |                                                     |     |                                                                                      | 211 | 253 | 4  |    |
|    |               |            |                                                     |     |                                                                                      | 49  | 58  | 7  |    |
|    |               |            |                                                     |     |                                                                                      | 45  | 58  | 7  |    |
|    |               |            |                                                     |     |                                                                                      | 254 | 272 | 74 |    |
|    |               |            |                                                     |     |                                                                                      | 1   | 24  | 5  |    |
|    |               |            |                                                     |     |                                                                                      | 1   | 24  | 5  |    |
|    |               |            |                                                     |     |                                                                                      | 25  | 48  | 4  |    |
|    |               |            |                                                     |     |                                                                                      | 59  | 82  | 8  |    |
|    |               |            |                                                     |     |                                                                                      | 60  | 82  | 8  |    |
|    |               |            |                                                     |     |                                                                                      | 44  | 58  | 7  |    |
|    |               |            |                                                     |     |                                                                                      | 44  | 58  | 7  |    |
|    |               |            |                                                     |     |                                                                                      | 273 | 300 | 74 |    |
| 2  | Not clustered | PVX_043190 | variable surface protein Vir12, truncated, putative | 319 |  | 229 | 271 | 4  |    |
|    |               |            |                                                     |     |                                                                                      | 65  | 77  | 7  |    |
|    |               |            |                                                     |     |                                                                                      | 26  | 39  | 7  |    |
|    |               |            |                                                     |     |                                                                                      | 272 | 300 | 74 |    |
|    |               |            |                                                     |     |                                                                                      | 40  | 63  | 8  |    |
|    |               |            |                                                     |     |                                                                                      | 79  | 101 | 8  |    |
|    |               |            |                                                     |     |                                                                                      | 2   | 22  | 8  |    |
|    |               |            |                                                     |     |                                                                                      | 308 | 317 | 4  |    |
|    |               |            |                                                     |     |                                                                                      | 41  | 63  | 8  |    |
|    |               |            |                                                     |     |                                                                                      | 80  | 101 | 8  |    |
|    |               |            |                                                     |     |                                                                                      | 2   | 22  | 8  |    |
|    |               |            |                                                     |     |                                                                                      | 25  | 39  | 7  |    |
|    |               |            |                                                     |     |                                                                                      | 65  | 77  | 7  |    |
|    |               |            |                                                     |     |                                                                                      | 25  | 39  | 7  |    |
| 65 | 77            | 7          |                                                     |     |                                                                                      |     |     |    |    |
| 3  | Not clustered | PVX_130260 | variable surface protein Vir12, truncated, putative | 108 |  | 45  | 65  | 74 |    |
|    |               |            |                                                     |     |                                                                                      | 1   | 43  | 4  |    |
|    |               |            |                                                     |     |                                                                                      | 44  | 65  | 74 |    |
| 4  | Not clustered | PVX_129260 | variable surface protein Vir12, putative            | 59  |  | 73  | 84  | 4  |    |
|    |               |            |                                                     |     |                                                                                      | 1   | 16  | 74 |    |
|    |               |            |                                                     |     |                                                                                      | 1   | 16  | 74 |    |
|    |               |            |                                                     |     |                                                                                      | 24  | 35  | 4  |    |
|    |               |            |                                                     |     |                                                                                      |     | 8   | 16 | 74 |
